# Supplementary material for: Dearomatization of aryl sulfoxides: a switch between mono- and dual-difluoroalkylation
Source: Royal Society of Chemistry journal article supplement (doi:10.1039/d0sc00244e), 2020-01-01

## Supporting Information

### Dearomatization of Aryl Sulfoxides:

### A Switch between Mono- and Dual-Difluoroalkylation

Xin Huang,<sup>†</sup> Yage Zhang,<sup>†</sup> Weijian Liang,<sup>†</sup> Qifeng Zhang,<sup>†</sup> Yaling Zhan,<sup>†</sup> Lichun Kong,<sup>†</sup> Bo Peng<sup>\*,†</sup>

<sup>†</sup>Key Laboratory of the Ministry of Education for Advanced Catalysis Materials, Zhejiang Normal University, 688 Yingbin Road, Jinhua 321004, China

[pengbo@zjnu.cn](mailto:pengbo@zjnu.cn)

### Table of Contents

#### Contents

|                                                                                                                 |    |
|-----------------------------------------------------------------------------------------------------------------|----|
| 1 General information .....                                                                                     | 2  |
| 2 Preparation of starting materials .....                                                                       | 2  |
| 3 Optimization of reaction conditions.....                                                                      | 12 |
| 4 Identification of dearomatized key intermediate IM1.....                                                      | 14 |
| 5 General procedure for the dearomative mono- and dual-difluoroalkylation of aryl sulfoxides ...                | 21 |
| 6 General procedure for mono-difluoroalkylative dearomatization of aryl sulfoxide 1a.....                       | 45 |
| 7 Examination of difluoroenol silyl ethers 2b-2d.....                                                           | 51 |
| 8 Gram-scale reactions and conversion of product 3a to highly substituted difluoroalkylated cyclohexenones..... | 52 |
| 9 NMR spectra .....                                                                                             | 55 |

## 1 General information

Unless otherwise indicated, all glassware was oven dried before use and all reactions were performed under an atmosphere of Nitrogen. All solvents were distilled from appropriate drying agents prior to use. All reagents were used as received from commercial suppliers. Reaction progress was monitored by thin layer chromatography (TLC) performed on plastic plates coated with silica gel GF254 with 0.2 mm thickness. Chromatograms were visualized by fluorescence quenching with UV light at 254 nm or by staining using potassium permanganate. Compound isolation was performed on chromatography column using silica gel 60 (160-200 mesh) or Biotage Isolera Prime flash column system. Neat infrared spectra were recorded using a NEXUS670 FT-IR spectrometer. Wavelengths ( $\nu$ ) are reported in  $\text{cm}^{-1}$ . MS (EI) analysis was performed on Agilent GC-MS instrument. High-resolution mass spectrometry (HRMS) analysis was carried out using a TOF MS instrument with ESI or APCI source. All  $^1\text{H}$ ,  $^{13}\text{C}$  and  $^{19}\text{F}$  NMR spectra were recorded on Bruker AV-400 or AV-600.  $^1\text{H}$ -NMR and  $^{13}\text{C}$ -NMR chemical shifts were reported in parts per million (ppm), and the residual solvent peak was used as an internal reference: proton (chloroform  $\delta$  7.26, methanol  $\delta$  3.31), carbon (chloroform  $\delta$  77.16, methanol  $\delta$  49.00).  $^{19}\text{F}$ -NMR chemical shift were determined relative to  $\text{CFCl}_3$  as inter standard. Multiplicity was indicated as follows: s (singlet), d (doublet), t (triplet), q (quartet), m (multiplet), dd (doublet of doublet). Coupling constants were reported in Hertz (Hz).

## 2 Preparation of starting materials

Difluoroenol silyl ether **2a**<sup>1</sup>, **2b**<sup>2</sup>, **2c**<sup>3</sup> and **2d**<sup>4</sup> are known compounds.

1. Wu, Y.-B., Lu, G.-P., Zhou, B.-J., Bu, M.-J., Wan, L., Cai, C. *Chem. Commun.* 2016, **52**, 5965.
2. Yamana, M.; Ishihara, T.; Ando, T. *Tetrahedron Lett.* 1983, **24**, 507.
3. Fedorov, O. V.; Struchkova, M. I.; Dilman, A. D. *J. Org. Chem.* 2016, **81**, 9455.
4. Zhang, Y.; Yan, W.; Wang, Y.; Weng, Z. *Org. Lett.* 2017, **19**, 5478.

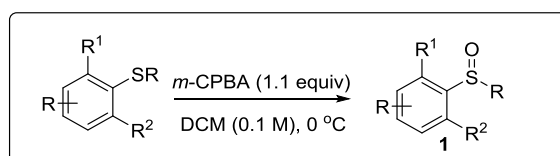

**General procedure:** To a solution of sulfide (3.0-10 mmol) in DCM (0.1 M) was added a solution

of *m*-CPBA (1.1 equiv.) in DCM (0.5 M) at -5 °C. After the starting sulfide completely consumed, the reaction was quenched with sat. aq. NaHCO<sub>3</sub>. The organic layer was separated, and the aqueous layer was extracted with CH<sub>2</sub>Cl<sub>2</sub>. The combined organic layers were washed with brine, dried over Na<sub>2</sub>SO<sub>4</sub>, filtrated and concentrated in vacuum. The obtained residue was purified by column chromatography on silica gel to afford the corresponding sulfoxides **1**.

#### 2-(butylsulfinyl)-1,3-dimethylbenzene (**1a**):

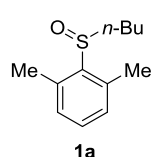

Following general procedure, the title compound was prepared from 20 mmol of corresponding aryl sulfide and was obtained as colorless oil, 3.1 g, 73% yield.

**<sup>1</sup>H NMR (600 MHz, CDCl<sub>3</sub>):** δ 7.22 – 7.18 (m, 1H), 7.02 (d, *J* = 7.6 Hz, 2H), 3.28 – 3.23 (m, 1H), 2.85 – 2.78 (m, 1H), 2.56 (s, 6H), 1.81 – 1.62 (m, 2H), 1.56 – 1.38 (m, 2H), 0.94 (t, *J* = 7.4 Hz, 3H).

**<sup>13</sup>C NMR (151 MHz, CDCl<sub>3</sub>):** δ 138.4, 138.3, 130.8, 130.3, 52.1, 25.8, 22.0, 19.4, 13.8.

**IR (neat):** 2957, 2928, 2871, 1580, 1458, 1380, 913, 773.

**HRMS (APCI-TOF):** calculated for [C<sub>12</sub>H<sub>18</sub>OSNa (M + Na<sup>+</sup>): 233.0971, found: 233.1006.

#### 1,3-dimethyl-2-(methylsulfinyl)benzene (**1b**):

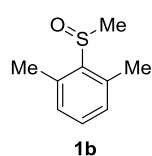

Following general procedure, the title compound was prepared from 10 mmol of corresponding aryl sulfide and was obtained as white solid, m.p. 51 – 52 °C, 1.3 g, 80% yield.

**<sup>1</sup>H NMR (600 MHz, CDCl<sub>3</sub>):** δ 7.26 – 7.22 (m, 1H), 7.06 (d, *J* = 7.6 Hz, 2H), 2.88 (s, 3H), 2.61 (s, 6H).

**<sup>13</sup>C NMR (151 MHz, CDCl<sub>3</sub>):** δ 139.1, 137.9, 130.9, 130.3, 38.3, 19.1.

**IR (neat):** 3057, 2919, 1579, 1459, 1381, 774.

The expected MS of title compound was not detected by LC/TOF-MS with ESI and APCI sources under both positive and negative models.

**EI-MS:** found 168.0.

### 1,3-dimethyl-2-((4-phenylbutyl)sulfinyl)benzene (1c):

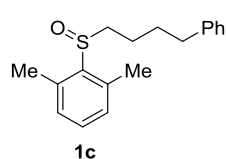

Following general procedure, the title compound was prepared from 5 mmol of corresponding aryl sulfide and was obtained as colorless oil, 1.1 g, 75% yield.

**<sup>1</sup>H NMR (600 MHz, CDCl<sub>3</sub>):** δ 7.32 – 7.28 (m, 2H), 7.26 – 7.19 (m, 2H), 7.18 (d, *J* = 7.4 Hz, 2H), 7.06 (d, *J* = 7.6 Hz, 2H), 3.35 – 3.29 (m, 1H), 2.91 – 2.81 (m, 1H), 2.68 (t, *J* = 6.5 Hz, 2H), 2.59 (s, 6H), 1.93 – 1.73 (m, 4H).

**<sup>13</sup>C NMR (151 MHz, CDCl<sub>3</sub>):** δ 141.6, 138.4, 138.3, 130.8, 130.3, 128.5, 128.4, 126.0, 52.3, 35.6, 30.6, 23.5, 19.3.

**IR (neat):** 3057, 3024, 2927, 2857, 1602, 1581, 1458, 1380, 910, 773.

**HRMS (APCI -TOF):** calculated for [C<sub>18</sub>H<sub>22</sub>OSNa (M + Na<sup>+</sup>): 309.1284, found: 309.1308.

### 2-(butylsulfinyl)-1,3,5-trimethylbenzene (1d):

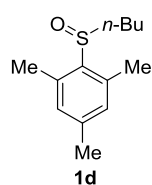

Following general procedure, the title compound was prepared from 5 mmol of corresponding aryl sulfide and was obtained as colorless oil, 1.8 g, 82% yield.

**<sup>1</sup>H NMR (600 MHz, CDCl<sub>3</sub>):** δ 6.84 (s, 2H), 3.27 – 3.22 (m, 1H), 2.86 – 2.78 (m, 1H), 2.52 (s, 6H), 2.27 (s, 3H), 1.81 – 1.70 (m, 1H), 1.66 – 1.57 (m, 1H), 1.56 – 1.37 (m, 2H), 0.93 (t, *J* = 7.4 Hz, 3H).

**<sup>13</sup>C NMR (151 MHz, CDCl<sub>3</sub>):** δ 141.0, 138.4, 135.1, 131.0, 52.3, 25.9, 22.1, 21.1, 19.3, 13.8.

**IR (neat):** 2957, 2927, 2870, 1600, 1567, 1456, 1378, 1291, 1075, 1023, 850, 615.

**HRMS (APCI -TOF):** calculated for [C<sub>13</sub>H<sub>20</sub>OSNa (M + Na<sup>+</sup>): 247.1127, found: 247.1164.

### 4-(butylsulfinyl)-3,5-dimethyl-1,1'-biphenyl (1e):

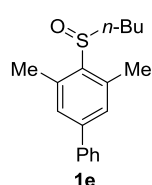

Following general procedure, the title compound was prepared from 5 mmol of corresponding aryl sulfide and was obtained as white solid, m.p. 93 – 94 °C, 958 mg, 67% yield.

**<sup>1</sup>H NMR (600 MHz, CDCl<sub>3</sub>):** δ 7.60 – 7.55 (m, 2H), 7.46 – 7.42 (m, 2H), 7.39 – 7.35 (m, 1H), 3.33 – 3.27 (m, 1H), 2.91 – 2.85 (m, 1H), 2.64 (s, 6H), 1.87 – 1.77 (m, 1H), 1.74 – 1.66 (m, 1H), 1.59 – 1.42 (m, 2H), 0.97 (t, *J* = 7.3 Hz, 3H).

**<sup>13</sup>C NMR (151 MHz, CDCl<sub>3</sub>):** δ 143.5, 139.8, 138.9, 137.2, 128.92, 128.89, 129.1, 127.2, 52.4,

25.9, 22.1, 19.6, 13.8.

**IR (neat):** 3061, 2956, 2926, 2868, 1594, 1560, 1071, 1022, 766, 697.

**HRMS (APCI -TOF):** calculated for [C<sub>18</sub>H<sub>22</sub>OSNa (M + Na<sup>+</sup>)]: 309.1284, found: 309.1300.

#### 2-(butylsulfinyl)-5-(chloromethyl)-1,3-dimethylbenzene (1f):

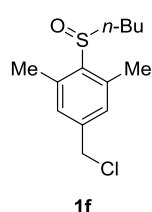

Following general procedure, the title compound was prepared from 5 mmol of corresponding aryl sulfide and was obtained as colorless oil, 929 mg, 72% yield.

**<sup>1</sup>H NMR (600 MHz, CDCl<sub>3</sub>):**  $\delta$  7.04 (s, 2H), 4.47 (s, 2H), 3.26 – 3.21 (m, 1H), 2.83 – 2.77 (m, 1H), 2.55 (s, 6H), 1.84 – 1.60 (m, 2H), 1.58 – 1.38 (m, 2H), 0.93 (t,  $J = 7.4$  Hz, 3H).

**<sup>13</sup>C NMR (151 MHz, CDCl<sub>3</sub>):**  $\delta$  139.9, 139.0, 138.4, 130.2, 52.2, 45.2, 25.8, 22.0, 19.3, 13.7.

**IR (neat):** 2957, 2928, 2870, 1600, 1571, 1445, 1380, 1075, 1027, 728, 699.

**HRMS (APCI -TOF):** calculated for [C<sub>13</sub>H<sub>19</sub>ClOSNa (M + Na<sup>+</sup>)]: 281.0737, found: 281.0783.

#### 2-(butylsulfinyl)-5-(methoxymethyl)-1,3-dimethylbenzene (1g):

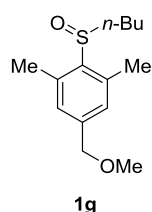

Following general procedure, the title compound was prepared from 5 mmol of corresponding aryl sulfide and was obtained as colorless oil, 660 mg, 52% yield.

**<sup>1</sup>H NMR (600 MHz, CDCl<sub>3</sub>):**  $\delta$  6.98 (s, 2H), 4.35 (s, 2H), 3.36 (s, 3H), 3.26 – 3.18 (m, 1H), 2.82 – 2.75 (m, 1H), 2.54 (s, 6H), 1.76 – 1.56 (m, 2H), 1.54 – 1.39 (m, 2H), 0.91 (t,  $J = 7.4$  Hz, 3H).

**<sup>13</sup>C NMR (151 MHz, CDCl<sub>3</sub>):**  $\delta$  141.0, 138.6, 137.3, 129.1, 73.9, 58.5, 52.2, 25.7, 22.0, 19.3, 13.7.

**IR (neat):** 2957, 2927, 2871, 1601, 1567, 1449, 1419, 1379, 1100, 1074, 1023, 859.

**HRMS (APCI -TOF):** calculated for [C<sub>14</sub>H<sub>22</sub>O<sub>2</sub>SNa (M + Na<sup>+</sup>)]: 277.1233, found: 277.1276.

#### 4-(butylsulfinyl)-3,5-dimethylbenzyl cinnamate (1h):

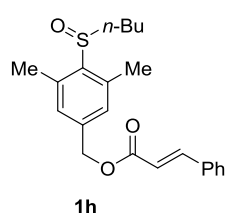

Following general procedure, the title compound was prepared from 5 mmol of corresponding aryl sulfide and was obtained as colorless oil, 1.2 g, 63% yield.

**<sup>1</sup>H NMR (600 MHz, CDCl<sub>3</sub>):** δ 7.74 (d, *J* = 16.0 Hz, 1H), 7.55 – 7.50 (m, 2H), 7.42 – 7.35 (m, 3H), 7.07 (s, 2H), 6.50 (d, *J* = 16.0 Hz, 1H), 5.18 (s, 2H), 3.29 – 3.23 (m, 1H), 2.85 – 2.79 (m, 1H), 2.58 (s, 6H), 1.78 – 1.42 (m, 4H), 0.95 (t, *J* = 7.4 Hz, 3H).

**<sup>13</sup>C NMR (151 MHz, CDCl<sub>3</sub>):** δ 166.8, 145.6, 138.9, 138.8, 138.3, 134.3, 130.6, 129.7, 129.0, 128.3, 117.6, 65.5, 52.3, 25.8, 22.1, 19.4, 13.8.

**IR (neat):** 2957, 2928, 2871, 1708, 1634, 1156, 1028, 980, 863, 767.

**HRMS (APCI -TOF):** calculated for [C<sub>22</sub>H<sub>26</sub>O<sub>3</sub>SNa (M + Na<sup>+</sup>): 393.1495, found: 393.1496.

**methyl 4-(butylsulfinyl)-3,5-dimethylbenzoate (1i):**

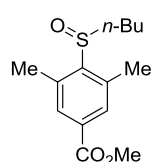

Following general procedure, the title compound was prepared from 5 mmol of corresponding aryl sulfide and was obtained as colorless oil, 884 mg, 66% yield.

**<sup>1</sup>H NMR (600 MHz, CDCl<sub>3</sub>):** δ 7.68 (s, 2H), 3.90 (s, 3H), 3.28 – 3.22 (m, 1H), 2.84 – 2.78 (m, 1H), 2.60 (s, 6H), 1.81 – 1.64 (m, 2H), 1.56 – 1.43 (m, 2H), 0.94 (t,

*J* = 7.3 Hz, 3H).

**<sup>13</sup>C NMR (151 MHz, CDCl<sub>3</sub>):** δ 166.4, 143.3, 138.7, 131.8, 131.0, 52.5, 52.2, 25.8, 22.0, 19.4, 13.8.

**IR (neat):** 2955, 2931, 2871, 1719, 1569, 1435, 1406, 1306, 1214, 1017, 756.

**HRMS (APCI -TOF):** calculated for [C<sub>14</sub>H<sub>20</sub>O<sub>3</sub>SNa (M + Na<sup>+</sup>): 291.1025, found: 291.1059.

**4-(butylsulfinyl)-3,5-dimethylbenzonitrile (1j):**

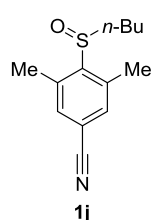

Following general procedure, the title compound was prepared from 5 mmol of corresponding aryl sulfide and was obtained as white solid, m.p. 67 – 68 °C, 846 mg, 72% yield.

**<sup>1</sup>H NMR (600 MHz, CDCl<sub>3</sub>):** δ 7.30 (s, 2H), 3.29 – 3.17 (m, 1H), 2.82 – 2.75 (m, 1H), 2.56 (s, 6H), 1.82 – 1.63 (m, 2H), 1.57 – 1.38 (m, 2H), 0.93 (t, *J* = 7.3 Hz, 3H).

**<sup>13</sup>C NMR (151 MHz, CDCl<sub>3</sub>):** δ 143.8, 139.5, 133.1, 117.8, 114.2, 52.0, 25.5, 21.8, 19.0, 13.6.

**IR (neat):** 2957, 2923, 2855, 2220, 1560, 1442, 1379, 1077, 1031, 881, 607.

**HRMS (APCI -TOF):** calculated for [C<sub>13</sub>H<sub>17</sub>NOSNa (M + Na<sup>+</sup>): 258.0923, found: 258.0953.

### 2-(butylsulfinyl)-1,3-dimethyl-5-(phenylethynyl)benzene (1k):

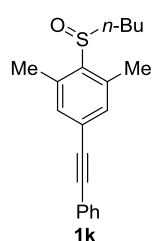

Following general procedure, the title compound was prepared from 5 mmol of corresponding aryl sulfide and was obtained as colorless oil, 1.1 g, 73% yield.

**<sup>1</sup>H NMR (600 MHz, CDCl<sub>3</sub>):** δ 7.52 – 7.49 (m, 2H), 7.36 – 7.31 (m, 3H), 7.20 (s, 2H), 3.29 – 3.23 (m, 1H), 2.86 – 2.80 (m, 1H), 2.54 (s, 6H), 1.81 – 1.62 (m, 2H), 1.56 – 1.42 (m, 2H), 0.95 (t, *J* = 7.3 Hz, 3H).

**<sup>13</sup>C NMR (151 MHz, CDCl<sub>3</sub>):** δ 138.6, 138.4, 132.9, 131.8, 128.7, 128.5, 125.8, 122.8, 91.3, 88.3, 52.3, 25.8, 22.0, 19.2, 13.8.

**IR (neat):** 2958, 2928, 2971, 2232, 1598, 1588, 1074, 1026, 909, 871, 755.

**HRMS (APCI -TOF):** calculated for [C<sub>20</sub>H<sub>22</sub>OSNa (M + Na<sup>+</sup>): 333.1284, found: 333.1302.

### 5-bromo-2-(butylsulfinyl)-1,3-dimethylbenzene (1l):

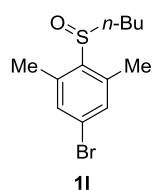

Following general procedure, the title compound was prepared from 5 mmol of corresponding aryl sulfide and was obtained as colorless oil, 1.2 g, 82% yield.

**<sup>1</sup>H NMR (600 MHz, CDCl<sub>3</sub>):** δ 7.21 (s, 2H), 3.26 – 3.21 (m, 1H), 2.84 – 2.78, 1H), 2.54 (s, 6H), 1.79 – 1.65 (m, 2H), 1.54 – 1.44 (m, 2H), 0.95 (t, *J* = 7.3 Hz,

3H).

**<sup>13</sup>C NMR (151 MHz, CDCl<sub>3</sub>):** δ 140.4, 137.5, 132.9, 125.8, 52.3, 25.8, 22.1, 19.2, 13.8.

**IR (neat):** 3051, 2957, 2928, 2870, 1561, 1457, 1398, 1379, 1246, 1075, 1029, 832.

**HRMS (APCI -TOF):** calculated for [C<sub>12</sub>H<sub>17</sub>BrOSNa (M + Na<sup>+</sup>): 311.0076, found: 311.0027.

### 2-(butylsulfinyl)-1,3-diethylbenzene (1m):

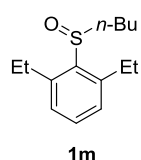

Following general procedure, the title compound was prepared from 5 mmol of corresponding aryl sulfide and was obtained as colorless oil, 892 mg, 75% yield.

**<sup>1</sup>H NMR (600 MHz, CDCl<sub>3</sub>):** δ 7.38 -7.29 (m, 1H), 7.11 (d, *J* = 7.6 Hz, 2H), 3.41 – 3.30 (m, 1H), 3.07 (s, 2H), 2.97 – 2.89 (m, 2H), 2.82 – 2.75 (m, 1H), 1.84 – 1.66 (m, 2H), 1.57 – 1.43 (m, 2H), 1.26 (t, *J* = 7.5 Hz, 6H), 0.95 (t, *J* = 7.4 Hz, 3H).

**<sup>13</sup>C NMR (151 MHz, CDCl<sub>3</sub>):** δ 145.2, 138.1, 131.3, 128.6, 54.0, 26.3, 25.3, 22.1, 16.4, 13.8.

**IR (neat):** 2940, 2930, 2871, 1579, 1458, 1401, 1379, 1073, 1030, 801, 739.

**HRMS (APCI -TOF):** calculated for [C<sub>14</sub>H<sub>22</sub>OSNa (M + Na<sup>+</sup>): 261.1284, found: 261.1314.

### 2-(butylsulfinyl)-1-ethyl-3-methylbenzene (1n):

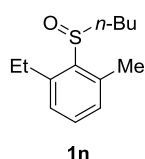

Following general procedure, the title compound was prepared from 5 mmol of corresponding aryl sulfide and was obtained as colorless oil, 862 mg, 77% yield.

**<sup>1</sup>H NMR (600 MHz, CDCl<sub>3</sub>):** δ 7.29 – 7.26 (m, 1H), 7.11 (d, *J* = 7.6 Hz, 1H), 7.07 (d, *J* = 7.5 Hz, 1H), 3.39 – 3.29 (m, 1H), 3.03 – 2.80 (m, 3H), 2.66 (s, 3H), 1.87 – 1.67 (m, 2H), 1.60 – 1.42 (m, 2H), 1.27 (t, *J* = 7.5 Hz, 3H), 0.97 (t, *J* = 7.3 Hz, 3H).

**<sup>13</sup>C NMR (151 MHz, CDCl<sub>3</sub>):** δ 144.8, 138.8, 131.1, 130.6, 128.4, 26.1, 25.6, 22.1, 19.4, 16.5, 13.8.

**IR (neat):** 2959, 2929, 2870, 1580, 1458, 1380, 1073, 1029, 784, 756, 732.

**HRMS (APCI -TOF):** calculated for [C<sub>13</sub>H<sub>20</sub>OSNa (M + Na<sup>+</sup>): 247.1127, found: 247.1167.

### 2-(butylsulfinyl)-3-methyl-1,1'-biphenyl (1o):

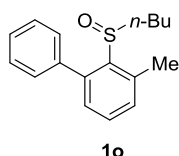

Following general procedure, the title compound was prepared from 5 mmol of corresponding aryl sulfide and was obtained as colorless oil, 1.1 g, 81% yield.

**<sup>1</sup>H NMR (600 MHz, CDCl<sub>3</sub>):** δ 7.42 – 7.36 (m, 4H), 7.31 – 7.24 (m, 3H), 7.13 – 7.09 (m, 1H), 3.24 – 3.18 (m, 1H), 2.85 (s, 3H), 2.83 – 2.78 (m, 1H), 1.62 –

1.50 (m, 2H), 1.36 – 1.23 (m, 2H), 0.85 (t, *J* = 7.4 Hz, 3H).

**<sup>13</sup>C NMR (151 MHz, CDCl<sub>3</sub>):** δ 143.1, 139.9, 139.5, 138.3, 132.8, 130.5, 129.7, 128.8, 128.0, 127.7, 52.4, 25.8, 21.7, 18.9, 13.6.

**IR (neat):**

**HRMS (APCI -TOF):** calculated for [C<sub>17</sub>H<sub>20</sub>OSNa (M + Na<sup>+</sup>): 295.1127, found: 296.1162.

### 2-(butylsulfinyl)-1-(methoxymethyl)-3-methylbenzene (1p):

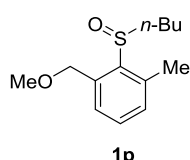

Following general procedure, the title compound was prepared from 5 mmol of corresponding aryl sulfide and was obtained as white solid, m.p. 48 – 49 °C, 864 mg, 72% yield.

**<sup>1</sup>H NMR (600 MHz, CDCl<sub>3</sub>):** δ 7.31 – 7.27 (m, 1H), 7.23 (d, *J* = 7.4 Hz, 1H), 7.17 (d, *J* = 7.6 Hz, 1H), 4.71 (d, *J* = 11.3 Hz, 1H), 4.57 (s, 1H), 3.40 – 3.32 (m, 4H), 2.85 – 2.78 (m, 1H), 2.65 (s, 3H), 1.88 – 1.73 (m, 2H), 1.60 – 1.43 (m, 2H), 0.95 (t, *J* = 7.4 Hz, 3H).kk

**<sup>13</sup>C NMR (151 MHz, CDCl<sub>3</sub>):** δ 139.9, 139.1, 137.9, 132.9, 130.7, 128.1, 58.1, 52.9, 26.2, 21.9,



19.0, 13.8.

**IR (neat):** 2954, 2927, 2869, 1582, 1453, 1389, 1087, 1029, 797, 777.

**HRMS (APCI -TOF):** calculated for [C<sub>13</sub>H<sub>20</sub>O<sub>2</sub>SNa (M + Na<sup>+</sup>): 263.1076, found: 263.1125.

**2-(butylsulfinyl)-3-methylbenzyl 4-chlorobutanoate (1q):**

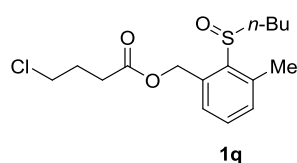

Following general procedure, the title compound was prepared from 5 mmol of corresponding aryl sulfide and was obtained as colorless oil, 974 mg, 59% yield.

**<sup>1</sup>H NMR (600 MHz, CDCl<sub>3</sub>):** δ 7.35 – 7.32 (m, 1H), 7.30 (d, *J* = 7.2 Hz, 1H), 7.19 (d, *J* = 7.4 Hz, 1H), 5.67 (d, *J* = 11.1 Hz, 1H), 5.37 (d, *J* = 12.9 Hz, 1H), 3.58 (t, *J* = 6.3 Hz, 2H), 3.49 – 3.34 (m, 1H), 2.91 – 2.76 (m, 1H), 2.57 (s, 3H), 2.53 (t, *J* = 7.2 Hz, 2H), 2.16 – 2.02 (m, 2H), 1.91 – 1.67 (m, 2H), 1.61 – 1.43 (m, 2H), 0.96 (t, *J* = 7.4 Hz, 3H).

**<sup>13</sup>C NMR (151 MHz, CDCl<sub>3</sub>):** δ 172.1, 139.5, 138.4, 136.4, 132.6, 131.1, 128.8, 62.9, 53.1, 44.1, 31.2, 27.6, 26.0, 22.1, 19.3, 13.8.

**IR (neat):** 2958, 2930, 2871, 1733, 1583, 1459, 1169, 1141, 1073, 784, 730.

**HRMS (APCI -TOF):** calculated for [C<sub>16</sub>H<sub>23</sub>ClO<sub>3</sub>SNa (M + Na<sup>+</sup>): 353.0949, found: 353.0957.

**2-(butylsulfinyl)-3-methylbenzyl ethyl fumarate (1r):**

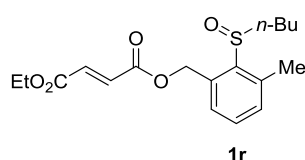

Following general procedure, the title compound was prepared from 5 mmol of corresponding aryl sulfide and was obtained as white solid, m.p. 88 – 89 °C, 1.1 g, 62% yield.

**<sup>1</sup>H NMR (600 MHz, CDCl<sub>3</sub>):** δ 7.36 – 7.30 (m, 2H), 7.19 (d, *J* = 6.8 Hz, 1H), 6.85 (s, 2H), 5.78 (s, 1H), 5.50 (d, *J* = 12.9 Hz, 1H), 4.27 – 4.13 (m, 2H), 3.47 – 3.29 (m, 1H), 2.82 (s, 1H), 2.56 (s, 3H), 1.90 – 1.80 (m, 1H), 1.76 – 1.66 (m, 1H), 1.57 – 1.41 (m, 2H), 1.29 (t, *J* = 7.3 Hz, 3H), 0.94 (t, *J* = 7.3 Hz, 3H).

**<sup>13</sup>C NMR (151 MHz, CDCl<sub>3</sub>):** δ 164.8, 164.4, 139.6, 138.3, 135.9, 134.4, 133.1, 132.7, 131.1, 128.9, 63.6, 61.5, 53.2, 26.0, 22.0, 19.2, 14.2, 13.8.

**IR (neat):**

**HRMS (APCI -TOF):** calculated for [C<sub>18</sub>H<sub>24</sub>O<sub>5</sub>SNa (M + Na<sup>+</sup>): 375.1237, found: XXXXX

### 2-(butylsulfinyl)-3-methylbenzyl 5-chlorothiophene-2-carboxylate (1s):

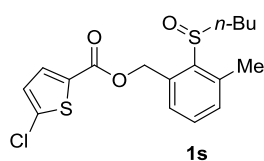

Following general procedure, the title compound was prepared from 5 mmol of corresponding aryl sulfide and was obtained as light yellow semi solid, 1.2 g, 67% yield.

**<sup>1</sup>H NMR (600 MHz, CDCl<sub>3</sub>):** δ 7.60 (d, *J* = 4.0 Hz, 1H), 7.38 – 7.32 (m, 2H), 7.20 (d, *J* = 7.3 Hz, 1H), 6.93 (d, *J* = 4.0 Hz, 1H), 5.86 (s, 1H), 5.58 (d, *J* = 13.0 Hz, 1H), 3.47 – 3.42 (m, 1H), 2.87 – 2.81 (m, 1H), 2.58 (s, 3H), 1.92 – 1.72 (m, 2H), 1.54 – 1.38 (m, 2H), 0.94 (t, *J* = 7.4 Hz, 3H).

**<sup>13</sup>C NMR (151 MHz, CDCl<sub>3</sub>):** δ 160.7, 139.6, 138.4, 137.8, 136.2, 133.5, 132.7, 131.5, 131.1, 128.9, 127.5, 63.6, 53.2, 26.1, 22.1, 19.3, 13.8

**IR (neat):** 2958, 2929, 2870, 1707, 1421, 1272, 1243, 1081, 1032, 783, 711.

**HRMS (APCI -TOF):** calculated for [C<sub>17</sub>H<sub>19</sub>ClO<sub>3</sub>S<sub>2</sub>Na (M + Na<sup>+</sup>)]: 393.0356, found: 393.0364.

### 2-(butylsulfinyl)-1-chloro-3-methylbenzene (1t):

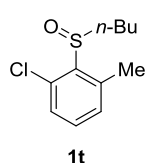

Following general procedure, the title compound was prepared from 5 mmol of corresponding aryl sulfide and was obtained as white solid, m.p. 62 – 64 °C, 886 mg, 77% yield.

**<sup>1</sup>H NMR (600 MHz, CDCl<sub>3</sub>):** δ 7.25 – 7.19 (m, 2H), 7.12 – 7.09 (m, 1H), 3.30 – 3.23 (m, 1H), 3.01 – 2.95 (m, 1H), 2.67 (s, 3H), 1.83 – 1.70 (m, 2H), 1.58 – 1.43 (m, 2H), 0.94 (t, *J* = 7.4 Hz, 3H).

**<sup>13</sup>C NMR (151 MHz, CDCl<sub>3</sub>):** δ 141.5, 137.8, 133.0, 131.8, 131.5, 128.5, 52.4, 25.6, 21.9, 18.6, 13.7.

**IR (neat):** 2951, 2900, 2869, 1582, 1453, 1389, 1075, 1029, 797, 720.

**HRMS (APCI -TOF):** calculated for [C<sub>11</sub>H<sub>15</sub>ClOSNa (M + Na<sup>+</sup>)]: 253.0424, found: 253.0409.

### 2-methyl-3-(methylsulfinyl)furan (1u):

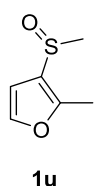

Following general procedure, the title compound was prepared from 5 mmol of corresponding aryl sulfide and was obtained as light yellow semi solid, 518 mg, 72% yield.

**<sup>1</sup>H NMR (600 MHz, CDCl<sub>3</sub>):** δ 7.35 (d, *J* = 2.1 Hz, 1H), 6.67 (d, *J* = 2.0 Hz, 1H), 2.76 (s, 3H), 2.41 (s, 3H).

**<sup>13</sup>C NMR (151 MHz, CDCl<sub>3</sub>):** δ 154.2, 142.6, 123.7, 106.2, 40.9, 12.3.

**IR (neat):** 3448, 3110, 2996, 1586, 1515, 1418, 1388, 1035, 1011, 939, 888, 738.

**HRMS (APCI -TOF):** calculated for [C<sub>6</sub>H<sub>8</sub>O<sub>2</sub>SNa (M + Na<sup>+</sup>): 167.0137, found: 167.0136.

#### 1-(butylsulfinyl)-2-methylnaphthalene (1v):

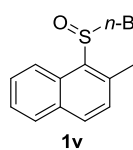

Following general procedure, the title compound was prepared from 5 mmol of corresponding aryl sulfide and was obtained as light yellow semi solid, 947 mg, 77% yield.

**<sup>1</sup>H NMR (600 MHz, CDCl<sub>3</sub>):** δ 9.08 (s, 1H), 7.88 – 7.82 (m, 2H), 7.60 – 7.49 (m, 2H), 7.32 – 7.22 (m, 1H), 3.62 – 3.48 (m, 1H), 3.10 – 3.04 (m, 1H), 2.73 (s, 3H), 1.90 – 1.75 (m, 1H), 1.71 – 1.60 (m, 1H), 1.57 – 1.43 (m, 2H), 0.94 (t, *J* = 7.3 Hz, 3H).

**<sup>13</sup>C NMR (151 MHz, CDCl<sub>3</sub>):** δ 137.4, 134.2, 133.3, 131.9, 131.2, 129.3, 129.0, 127.3, 126.0, 123.6, 52.8, 25.9, 22.0, 20.0, 13.8.

**IR (neat):** 2960, 2930, 2872, 1961, 1596, 1447, 1270, 1167, 1054, 859, 710, 686

**HRMS (APCI -TOF):** calculated for [C<sub>15</sub>H<sub>18</sub>OSNa (M + Na<sup>+</sup>): 269.0971, found: 269.0968

#### 3-(butylsulfinyl)-2-methyl-1-tosyl-1H-indole (1w):

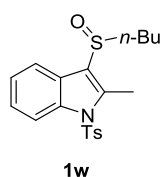

Following general procedure, the title compound was prepared from 5 mmol of corresponding aryl sulfide and was obtained as light yellow semi solid, 1.1 g, 63% yield.

**<sup>1</sup>H NMR (600 MHz, CDCl<sub>3</sub>):** δ 8.26 (d, *J* = 8.0 Hz, 1H), 8.08 (d, *J* = 7.2 Hz, 1H), 7.72 (d, *J* = 7.4 Hz, 2H), 7.42 – 7.18 (m, 4H), 3.00 (s, 3H), 2.75 (s, 3H), 2.37 (s, 3H).

**<sup>13</sup>C NMR (151 MHz, CDCl<sub>3</sub>):** δ 145.8, 138.3, 136.5, 135.6, 130.3, 126.6, 125.3, 124.8, 124.2, 120.8, 119.8, 114.8, 40.2, 21.7, 13.6.

**IR (neat):** 2956, 2927, 2871, 1691, 1596, 1447, 1275, 1091, 1045, 910, 713, 686.

**HRMS (APCI -TOF):** calculated for [C<sub>17</sub>H<sub>17</sub>NO<sub>3</sub>S<sub>2</sub>Na (M + Na<sup>+</sup>): 370.0542, found: 370.0541.

### 3 Optimization of reaction conditions

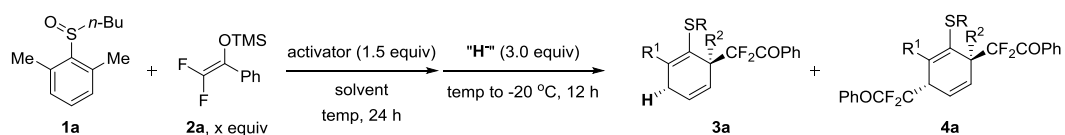

| entry | activator                            | solvent           | temp (°C) | "H"                           | x (equiv) of 2a | yield of 3a (%) | yield of 4a (%) |
|-------|--------------------------------------|-------------------|-----------|-------------------------------|-----------------|-----------------|-----------------|
| 1     | TFAA                                 | DCM               | -78       | Et <sub>3</sub> SiH           | 1.5             | 0               | 0               |
| 2     | TFAA                                 | CHCl <sub>3</sub> | -60       | Et <sub>3</sub> SiH           | 1.5             | 0               | 0               |
| 3     | TFAA                                 | MeCN              | -50       | Et <sub>3</sub> SiH           | 1.5             | 47              | 15              |
| 6     | TFAA                                 | MeCN/DCM (1/1)    | -50       | Et <sub>3</sub> SiH           | 1.5             | 19              | 26              |
| 7     | TFAA                                 | MeCN/DCM (10/1)   | -50       | Et <sub>3</sub> SiH           | 1.5             | 50              | 20              |
| 8     | TFAA                                 | MeCN/DCM (9/1)    | -50       | Et <sub>3</sub> SiH           | 1.5             | 65              | 5               |
| 9     | TFAA                                 | MeCN/DCM (8/1)    | -50       | Et <sub>3</sub> SiH           | 1.5             | 27              | 29              |
| 10    | TFAA                                 | MeCN/DCM (9/1)    | -40       | Et <sub>3</sub> SiH           | 1.5             | 47              | 23              |
| 11    | TFAA                                 | MeCN/DCM (9/1)    | -50       | (MeO) <sub>3</sub> SiH        | 1.5             | 43              | 9               |
| 12    | TFAA                                 | MeCN/DCM (9/1)    | -50       | <i>i</i> -Pr <sub>3</sub> SiH | 1.5             | 54              | 9               |
| 13    | TFAA                                 | MeCN/DCM (9/1)    | -50       | L-selectride                  | 1.5             | 0               | 0               |
| 14    | TFAA                                 | MeCN/DCM (9/1)    | -50       | DIBAL-H                       | 1.5             | 32              | trace           |
| 15    | TFAA                                 | MeCN/DCM (9/1)    | -50       | Et <sub>3</sub> SiH           | 2.0             | 58              | 16              |
| 17    | Ts <sub>2</sub> O                    | MeCN/DCM (9/1)    | -50       | Et <sub>3</sub> SiH           | 1.5             | 0               | trace           |
| 18    | Tf <sub>2</sub> O                    | MeCN/DCM (9/1)    | -50       | Et <sub>3</sub> SiH           | 1.5             | 0               | 17              |
| 19    | (ClF <sub>2</sub> CO) <sub>2</sub> O | MeCN/DCM (9/1)    | -50       | Et <sub>3</sub> SiH           | 1.5             | 61              | 10              |
| 20    | Tf <sub>2</sub> O                    | DCM               | -78       | none                          | 3.0             | 0               | 48              |
| 21    | Tf <sub>2</sub> O                    | MeCN              | -50       | none                          | 3.0             | 0               | 19              |
| 22    | Tf <sub>2</sub> O                    | DCM               | -50       | none                          | 3.0             | 0               | 35              |
| 23    | Tf <sub>2</sub> O                    | DCM               | -100      | none                          | 3.0             | 0               | 73              |
| 24    | Tf <sub>2</sub> O                    | DCM               | -100      | none                          | 2.5             | 0               | 66              |

General procedure for entries 1 to 19: To a stirred solution of sulfoxide **1a** (63 mg, 0.3 mmol) and difluoroenol silyl ether **2a** (1.5 to 2.0 equiv) in indicated solvent (3 mL) was added anhydride (1.5 equiv) at indicated temperature (-50 to -78 °C). The mixture was stirred for 24 h. After that, to the mixture was added reducing agent "H" (3.0 equiv), and the resulting mixture was then slowly warmed up to -20 °C. After stirring for 12 h, the mixture was passed through a short silica gel column and concentrated under vacuum. The obtained residue was further purified by flash chromatography on silica gel giving the title compounds **3a** and **4a**.

General procedure for entries 20 to 24: To a stirred solution of sulfoxide **1a** (63 mg, 0.3 mmol) and difluoroenol silyl ether **2a** (1.5 to 2.0 equiv) in indicated solvent (3 mL) was added  $\text{TiF}_4$  (76  $\mu\text{L}$ , 1.5 equiv) at indicated temperature (-50 to -100  $^\circ\text{C}$ ). The mixture was stirred for 24 h. After that, the mixture was passed through a short silica gel column and concentrated under vacuum. The obtained residue was further purified by flash chromatography on silica gel giving the title compound **4a**.

#### 4 Identification of dearomatized key intermediate **IM1**.

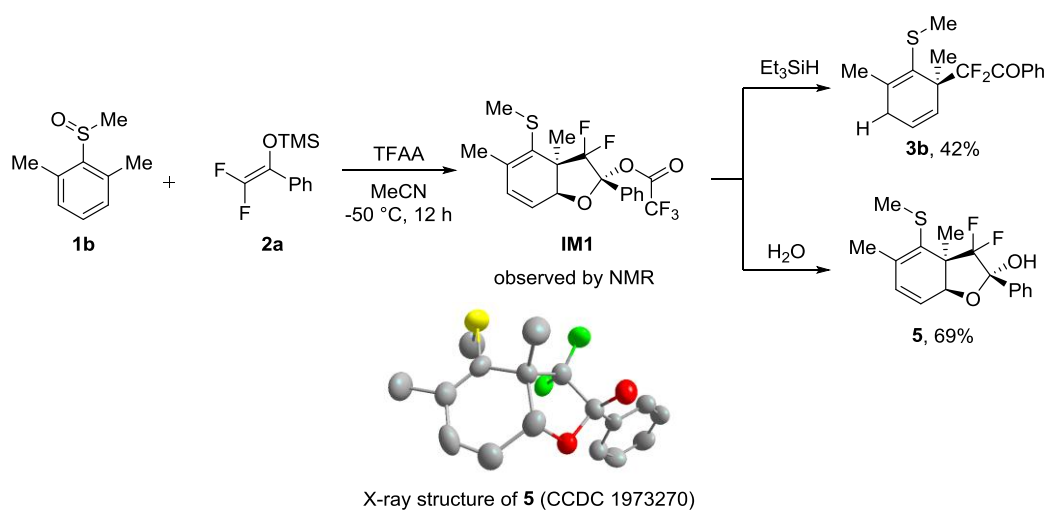

To a stirred solution of sulfoxide **1b** (17 mg, 0.1 mmol) and difluoroenol silyl ether **2a** (36 mg, 1.5 equiv) in CD<sub>3</sub>CN/DCM (0.45/0.05 mL) was added TFAA (21 μL, 1.5 equiv) at -50 °C. The NMR tube charged with reaction mixture was kept at -50 °C for 24 h. After that, the reaction mixture was brought for NMR analysis. The obtained <sup>1</sup>H, <sup>13</sup>C, and <sup>19</sup>F-NMR spectrum were shown at page S17.

**Reduction:** to the obtained mixture of **IM1** was added Et<sub>3</sub>SiH (35 mg, 3 equiv), and the resulting mixture was then slowly warmed up to -20 °C. After stirring for 12 h, the mixture was passed through a short silica gel column and concentrated under vacuum. The obtained residue was further purified by flash chromatography on silica gel giving the title compound **3b**, as light yellow oil, 15 mg, 42% yield

**<sup>1</sup>H NMR (600 MHz, CDCl<sub>3</sub>):** δ 7.96 (d, *J* = 7.9 Hz, 2H), 7.58 – 7.53 (m, 1H), 7.45 – 7.39 (m, 2H),

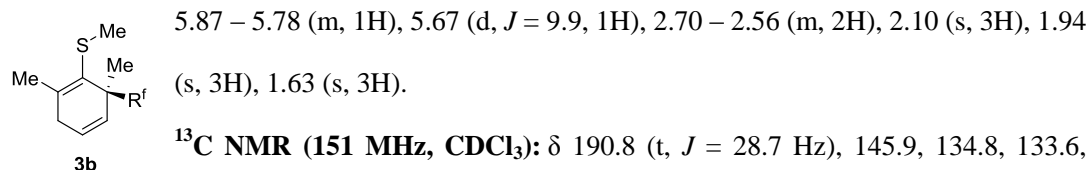

130.2 (t, *J* = 6.0 Hz), 128.8, 128.3, 127.7, 126.6, 120.5 (t, *J* = 262.7 Hz), 49.6 (t, *J* = 21.1 Hz), 34.8, 22.6, 22.2, 22.1, 20.1.

**<sup>19</sup>F NMR (565 MHz, CDCl<sub>3</sub>)** δ -104.7 (s, 1F), -104.8 (s, 1F).

**IR (neat):** 3037, 2980, 2920, 1691, 1596, 1577, 1447, 1092, 1050, 910, 686.

**HRMS (ESI-TOF):** calculated for [C<sub>17</sub>H<sub>18</sub>F<sub>2</sub>OSNa (M + Na<sup>+</sup>)]: 331.0939, found: 331.0939.

**Hydrolysis:** to the obtained mixture of **IM1** was added at. aq. NaHCO<sub>3</sub> (0.5 mL). The mixture was warmed to 0 °C. After that, the mixture was passed through a short silica gel column and concentrated under vacuum. The obtained residue was further purified by flash chromatography on silica gel giving the title compound **5**, as light yellow solid, 22 mg, m.p. 87 – 89 °C, 69% yield. (R<sub>f</sub> = 0.23, eluent: PE/EtOAc = 10/1). The crystal of **5** was obtained by crystallization from DCM and hexane at room temperature.

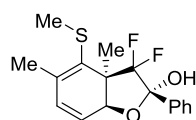

**5**

**<sup>1</sup>H NMR (600 MHz, CDCl<sub>3</sub>):** δ 7.65 – 7.59 (m, 2H), 7.42 – 7.34 (m, 3H), 6.04 (d, *J* = 9.8 Hz, 1H), 5.88 (dd, *J* = 9.7, 3.8 Hz, 1H), 4.71 (d, *J* = 3.9 Hz, 1H), 3.22 (bs, 1H), 2.15 (s, 3H), 2.11 (s, 3H), 1.58 (d, *J* = 2.0 Hz, 3H).

**<sup>13</sup>C NMR (151 MHz, CDCl<sub>3</sub>):** δ 136.8, 135.5, 131.1, 129.9, 129.5, 128.3, 126.9, 125.9 (t, *J* = 271.3 Hz), 121.8, 98.4 (m), 79.6, 50.1 (t, *J* = 21.1 Hz), 23.7 (dd, *J* = 9.0, 1.5 Hz), 21.1, 18.8 (d, *J* = 6.0 Hz).

**<sup>19</sup>F NMR (565 MHz, CDCl<sub>3</sub>)** δ -101.1 (d, *J* = 231.8 Hz, 1F), -121.3 (d, *J* = 231.8 Hz, 1F).

**IR (neat):** 3371, 2927, 1576, 1448, 1234, 1142, 1102, 1064, 1018, 976, 921, 709.

**HRMS (ESI-TOF):** calculated for [C<sub>17</sub>H<sub>18</sub>F<sub>2</sub>O<sub>2</sub>SNa (M + Na<sup>+</sup>): 347.0888, found: 347.0879.

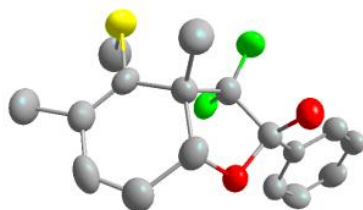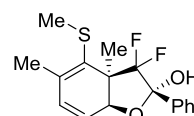

**5**

|                       |                                                                  |                 |
|-----------------------|------------------------------------------------------------------|-----------------|
| Bond precision        | c-c=0.00105 Å Wavelength=0.71073                                 |                 |
| Cell                  | a=8.497 (3) b=13.357 (5) c=13.775 (5)<br>α=90 β=85.689 (14) γ=90 |                 |
| Temperature           | 294 K                                                            |                 |
|                       | Calculated                                                       | Reported        |
| Volumn                | 1559.0(10)                                                       | 1559.0(10)      |
| Space group           | P 21/c                                                           | P2(1)/c         |
| Hall group            | -P 2ybc                                                          |                 |
| Moiety formula        | C17 H18 F2 O2 S                                                  | C17 H18 F2 O2 S |
| Sum formula           | C17 H18 F2 O2 S                                                  | C17 H18 F2 O2 S |
| Mr                    | 324.37                                                           | 324.37          |
| Dx,g cm <sup>-3</sup> | 1.382                                                            | 1.382           |

|                        |             |             |
|------------------------|-------------|-------------|
| Z                      | 4           | 4           |
| Mu (mm <sup>-1</sup> ) | 0.233       | 0.233       |
| F000                   | 680.0       | 680.0       |
| F000'                  | 680.88      |             |
| h,k,lmax               | 9,14,14     | 9,14,14     |
| Nref                   | 1941        | 1895        |
| Tmin,Tmax              | 0.954,0.975 | 0.954,0.975 |
| Tmin'                  | 0.937       |             |

Correction method= # Reported T Limits: Tmin=0.954 Tmax=0.975

AbsCorr = EMPIRICAL

Data completeness= 0.976    Theta(max)= 22.130

R(reflections)= 0.937    wR2(reflections)= 0.2022(1895)

S = 1.011    Npar= 199

---

Crystallographic data (excluding structural factors) for compound **5** also has been deposited at the Cambridge Crystallographic Data Centre under the deposition number CCDC 1973270.



## In-situ <sup>1</sup>H-NMR analysis of IM1

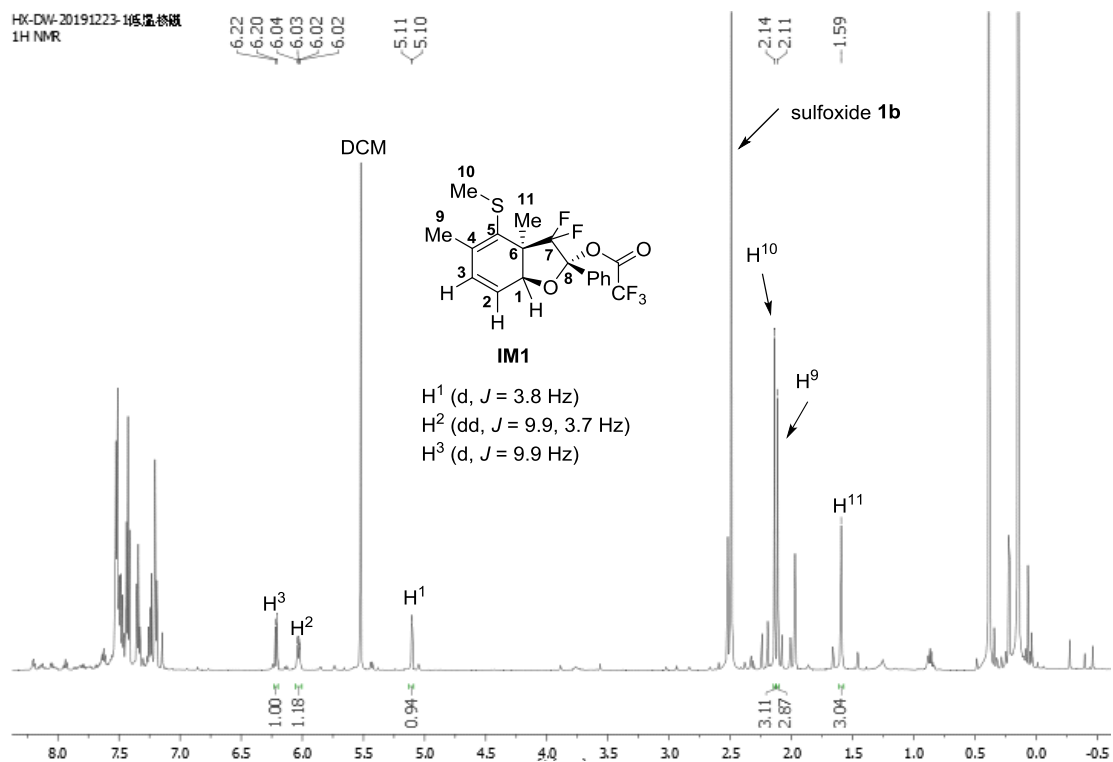

## <sup>1</sup>H-NMR analysis of 5

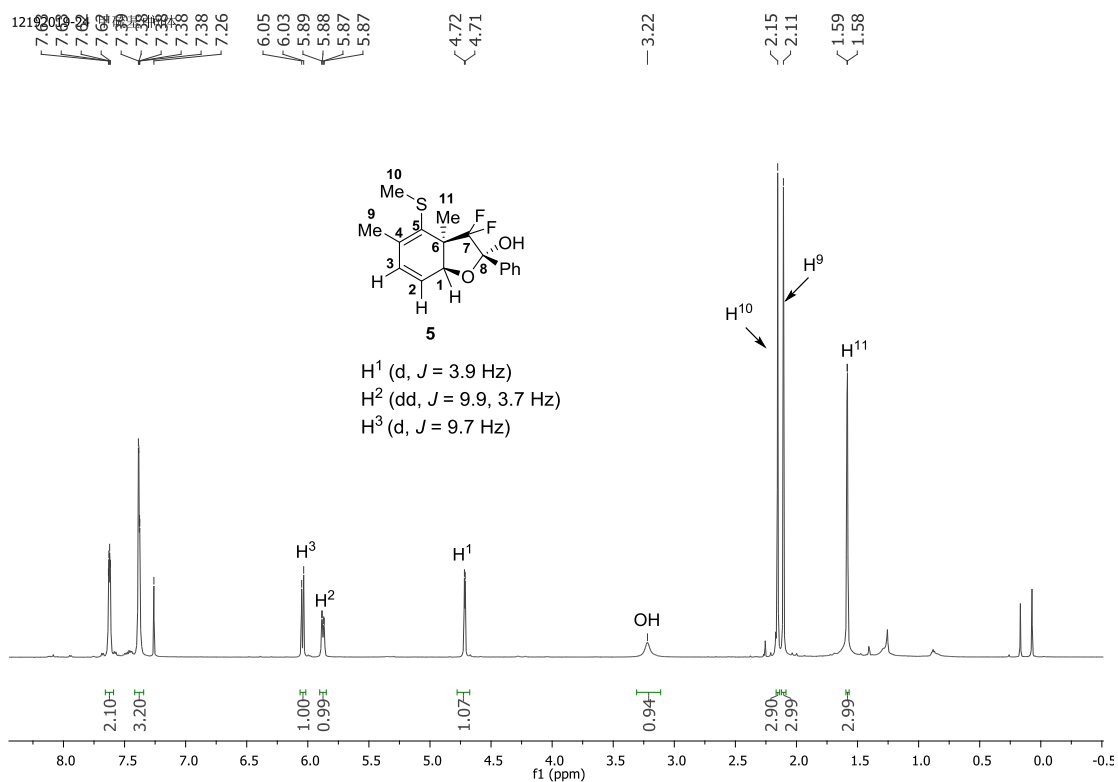

# In-situ <sup>13</sup>C-NMR analysis of IM1

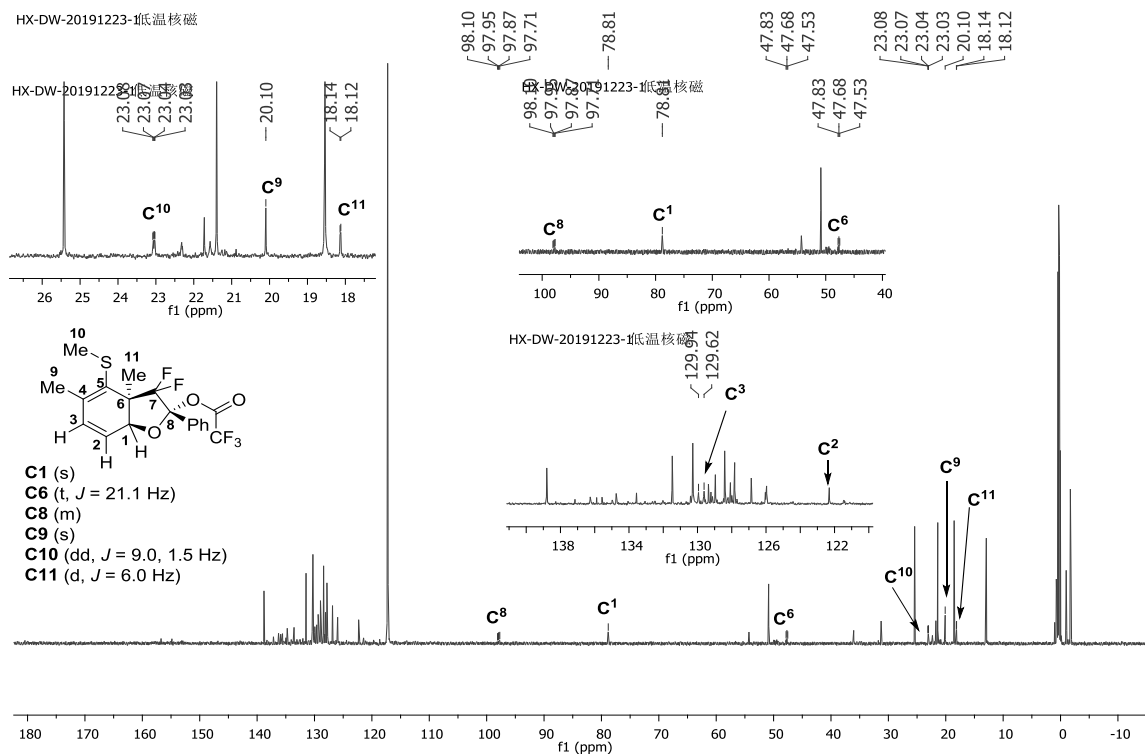

# <sup>13</sup>C-NMR analysis of 5

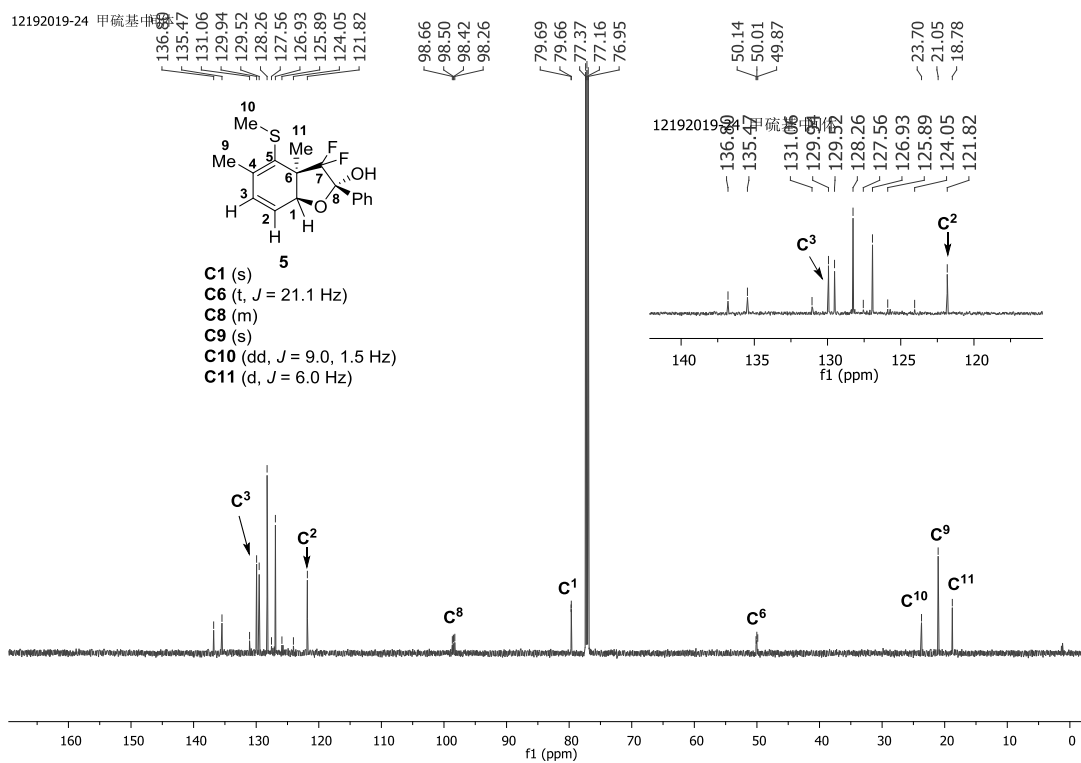

## In-situ <sup>19</sup>F-NMR analysis of IM1

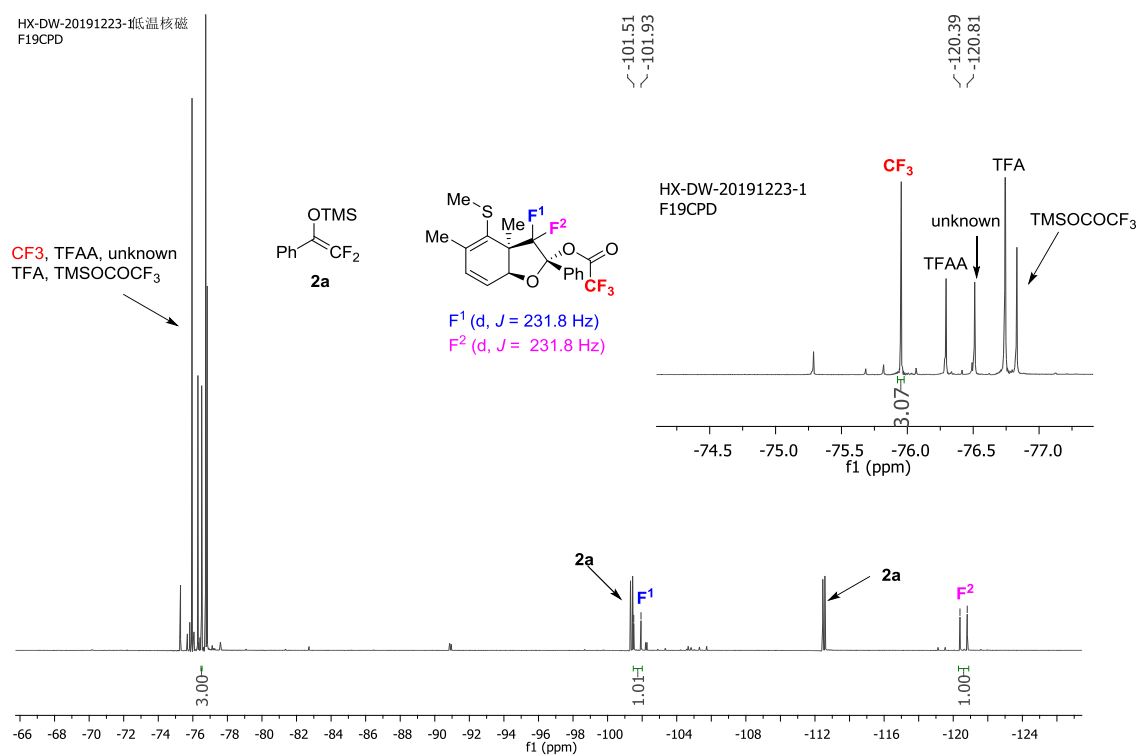

## <sup>19</sup>F-NMR analysis of 5

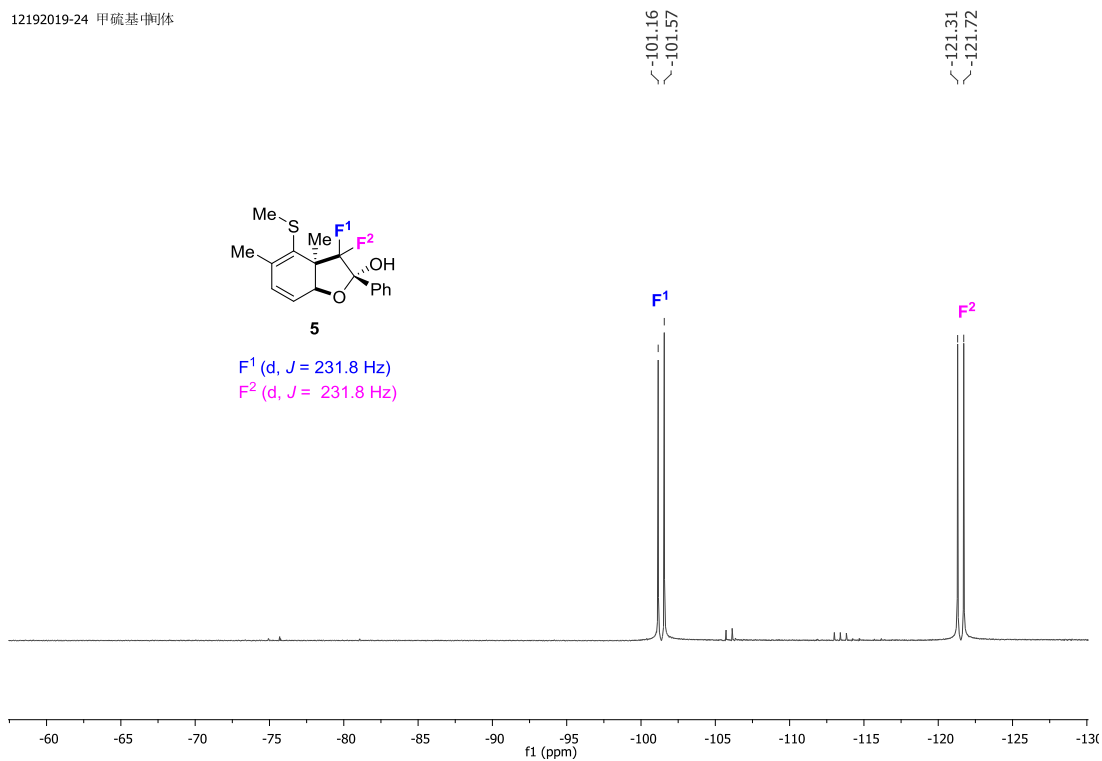

## In-situ COSEY-NMR analysis of IM1

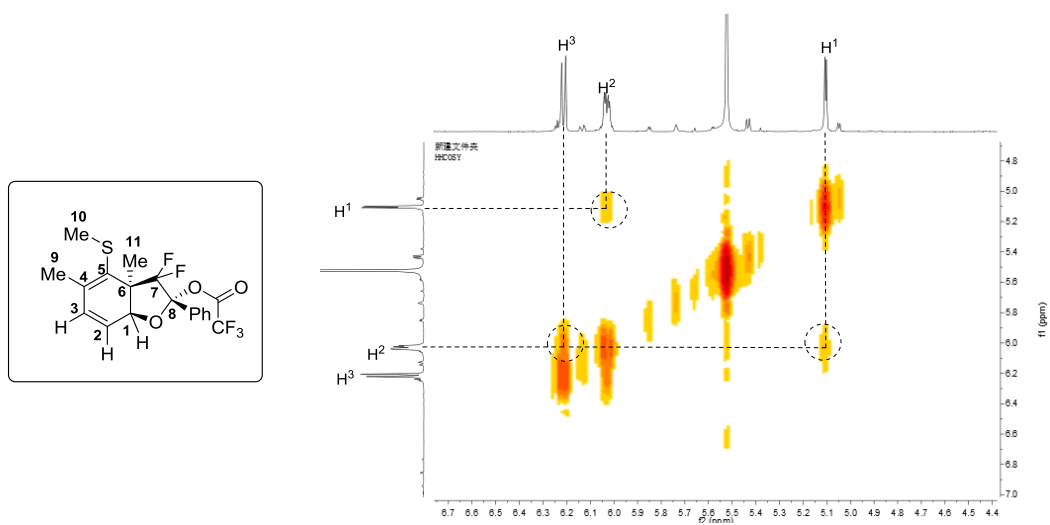

## In-situ HMQC AND HMQC analysis OF IM1

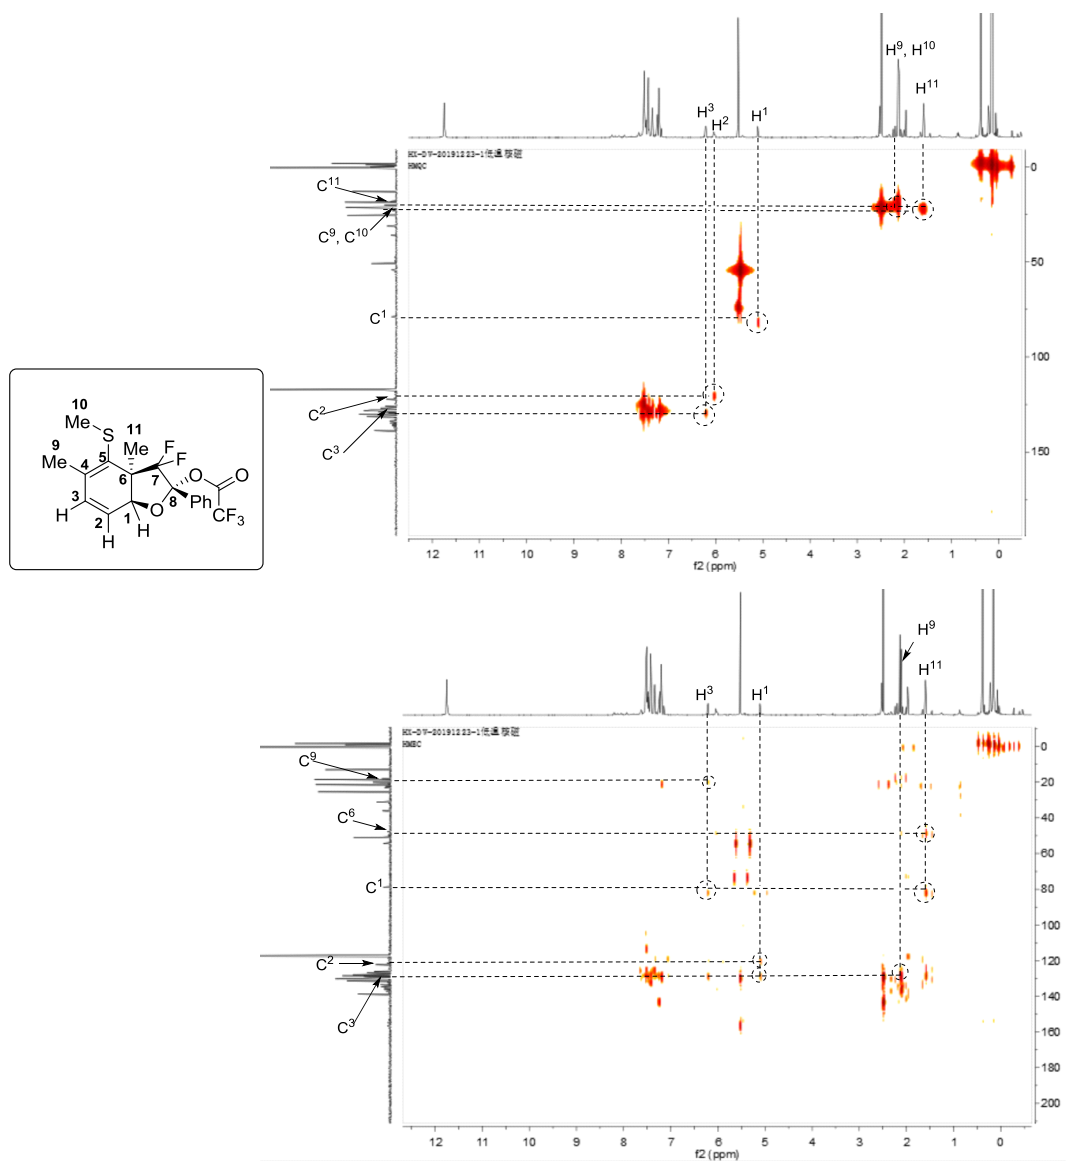

## 5 General procedure for the dearomative mono- and dual-difluoroalkylation of aryl sulfoxides

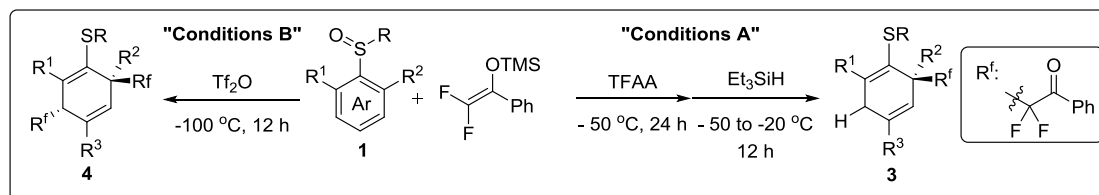

General procedure A for “**Conditions A**”: To a stirred solution of sulfoxide **1** (0.3 mmol) and difluoroenol silyl ether **2a** (103 mg, 1.5 equiv) in MeCN/DCM (9/1, 3 mL) was added TFAA (63  $\mu$ L, 1.5 equiv) at -50  $^{\circ}$ C. The mixture was then stirred at -50  $^{\circ}$ C for 24 h. After that, to the mixture was added Et<sub>3</sub>SiH (104 mg, 3.0 equiv), and the resulting mixture was then slowly warmed up to -20  $^{\circ}$ C. After stirring for 12 h, the mixture was passed through a short silica gel column and concentrated under vacuum. The obtained residue was further purified by flash chromatography on silica gel giving the title compound **3** (Note: After Et<sub>3</sub>SiH was added, reaction mixture was slowly warmed up to 0  $^{\circ}$ C for **1i**, **1j**, **1q**, **1r**, **1s** or 20  $^{\circ}$ C for **1k**).

General procedure B for “**Conditions B**”: To a stirred solution of sulfoxide **1** (0.3 mmol) and difluoroenol silyl ether **2a** (205 mg, 3.0 equiv) in DCM (3 mL) was added Tf<sub>2</sub>O (76  $\mu$ L, 1.5 equiv) at -100  $^{\circ}$ C. The mixture was stirred for 12 h. After that, the mixture was passed through a short silica gel column and concentrated under vacuum. The obtained residue was further purified by flash chromatography on silica gel giving the title compound **4**.

### 2-(2-(butylthio)-1,3-dimethylcyclohexa-2,5-dien-1-yl)-2,2-difluoro-1-phenylethan-1-one (**3a**):

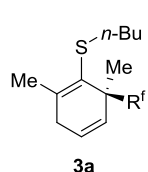

Following the general procedure A, the title compound was obtained as light yellow oil, 68 mg, 65% yield. (*R<sub>f</sub>* = 0.28, eluent: PE/EtOAc = 10/1).

<sup>1</sup>H NMR (600 MHz, CDCl<sub>3</sub>):  $\delta$  7.96 (d, *J* = 7.9 Hz, 2H), 7.56 – 7.52 (m, 1H), 7.43 – 7.38 (m, 2H), 5.83 – 5.79 (m, 1H), 5.68 – 5.65 (m, 1H), 2.65 – 2.62 (m, 1H), 2.58 – 2.51 (m, 3H), 1.91 (s, 3H), 1.63 (s, 3H), 1.52 – 1.46 (m, 2H), 1.39 – 1.32 (m, 2H), 0.87 (t, *J* = 7.3 Hz, 3H).

<sup>13</sup>C NMR (151 MHz, CDCl<sub>3</sub>):  $\delta$  190.8 (t, *J* = 28.7 Hz), 145.9, 134.7, 133.3, 130.2 (t, *J* = 6.0 Hz), 128.9, 126.9, 126.6, 120.5 (t, *J* = 262.7 Hz), 49.4 (t, *J* = 21.1 Hz), 36.9, 34.9, 31.6, 22.6, 22.4, 22.2, 13.8.

**<sup>19</sup>F NMR (565 MHz, CDCl<sub>3</sub>)** δ -104.1 (d, *J* = 254.3 Hz, 1F), -104.7 (d, *J* = 204.3 Hz, 1F).

**IR (neat):** 3057, 2958, 2930, 2872, 1694, 1597, 1448, 1101, 1043, 912, 821.

**HRMS (ESI-TOF):** calculated for [C<sub>20</sub>H<sub>24</sub>F<sub>2</sub>OSNa (M + Na<sup>+</sup>)]: 373.1408, found: 373.1407.

**2-(1,3-dimethyl-2-((4-phenylbutyl)thio)cyclohexa-2,5-dien-1-yl)-2,2-difluoro-1-phenylethan-1-one (3c):**

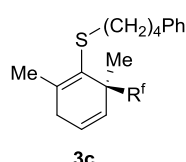

Following the general procedure A, the title compound was obtained as light yellow oil, 73 mg, 57% yield. (*R*<sub>f</sub> = 0.26, eluent: PE/EtOAc = 10/1).

**<sup>1</sup>H NMR (600 MHz, CDCl<sub>3</sub>):** δ 7.99 (d, *J* = 7.7 Hz, 2H), 7.61 – 7.55 (m, 1H), 7.48 – 7.41 (m, 2H), 7.33 – 7.27 (m, 2H), 7.23 – 7.15 (m, 3H), 5.87 – 5.83 (m,

1H), 5.71 (dd, *J* = 9.9, 2.4 Hz, 1H), 2.68 – 2.54 (m, 6H), 1.93 (s, 3H), 1.75 – 1.68 (m, 2H), 1.66 (s, 3H), 1.62 – 1.56 (m, 2H).

**<sup>13</sup>C NMR (151 MHz, CDCl<sub>3</sub>):** δ 190.9 (t, *J* = 28.7 Hz), 146.1, 142.3, 134.7, 133.5, 130.3 (t, *J* = 6.0 Hz), 128.9, 128.5, 128.4, 128.3, 126.7, 126.6, 125.9, 120.5 (t, *J* = 262.7 Hz), 49.4 (t, *J* = 21.1 Hz), 36.9, 35.7, 34.9, 30.8, 29.1, 22.6, 22.5.

**<sup>19</sup>F NMR (565 MHz, CDCl<sub>3</sub>)** δ -104.1 (d, *J* = 254.3 Hz, 1F), -104.7 (d, *J* = 204.3 Hz, 1F).

**IR (neat):** 3025, 2931, 2854, 1691, 1596, 1447, 1367, 1092, 1050, 910, 733, 679.

**HRMS (ESI-TOF):** calculated for [C<sub>26</sub>H<sub>28</sub>F<sub>2</sub>OSNa (M + Na<sup>+</sup>)]: 449.1721, found: 449.1718.

**2-(2-(butylthio)-1,3,5-trimethylcyclohexa-2,5-dien-1-yl)-2,2-difluoro-1-phenylethan-1-one (3d):**

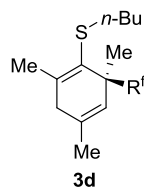

Following the general procedure A, the title compound was obtained as light yellow oil, 86 mg, 79% yield. (*R*<sub>f</sub> = 0.28, eluent: PE/EtOAc = 30/1).

**<sup>1</sup>H NMR (600 MHz, CDCl<sub>3</sub>):** δ 7.92 (d, *J* = 7.7 Hz, 2H), 7.52 (d, *J* = 7.2 Hz, 1H), 7.42 – 7.37 (m, 2H), 5.32 (s, 1H), 2.61 – 2.33 (m, 4H), 1.91 (s, 3H), 1.59 (s, 3H),

1.57 (s, 3H), 1.53 – 1.46 (m, 2H), 1.40 – 1.33 (m, 2H), 0.88 (t, *J* = 7.3 Hz, 3H).

**<sup>13</sup>C NMR (151 MHz, CDCl<sub>3</sub>):** δ 191.0 (t, *J* = 28.7 Hz), 145.6, 134.8, 133.4, 134.3, 130.2 (t, *J* = 6.0 Hz), 128.1, 126.8, 123.8, 120.7 (t, *J* = 262.7 Hz), 49.9 (t, *J* = 21.1 Hz), 39.5, 36.8, 31.7, 22.4, 22.33, 22.26, 22.22, 13.9.

**<sup>19</sup>F NMR (565 MHz, CDCl<sub>3</sub>)** δ -104.2 (d, *J* = 254.3 Hz, 1F), -104.8 (d, *J* = 254.3 Hz, 1F).

**IR (neat):** 2956, 2929, 2871, 1692, 1596, 1446, 1272, 1089, 1048, 914, 714, 687.

**HRMS (ESI-TOF):** calculated for [C<sub>21</sub>H<sub>26</sub>F<sub>2</sub>OSNa (M + Na<sup>+</sup>): 387.1565, found: 387.1559.

**2-(4-(butylthio)-3,5-dimethyl-3,6-dihydro-[1,1'-biphenyl]-3-yl)-2,2-difluoro-1-phenylethan-1-one (3e):**

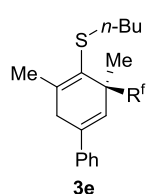

Following the general procedure A, the title compound was obtained as light yellow oil, 73 mg, 57% yield. (R<sub>f</sub> = 0.25, eluent: PE/EtOAc = 30/1).

**<sup>1</sup>H NMR (600 MHz, CDCl<sub>3</sub>):** δ 7.94 (d, *J* = 7.6 Hz, 2H), 7.52 – 7.47 (m, 1H), 7.38 – 7.34 (m, 2H), 7.32 – 7.25 (m, 5H), 5.97 (d, *J* = 2.4 Hz, 1H), 3.02 (d, *J* = 21.9 Hz, 1H), 2.88 (d, *J* = 21.9, 1H), 2.63 – 2.55 (m, 2H), 2.02 (s, 3H), 1.72 (s, 3H), 1.56 – 1.50 (m, 2H), 1.43 – 1.36 (m, 2H), 0.90 (t, *J* = 7.3 Hz, 3H).

**<sup>13</sup>C NMR (151 MHz, CDCl<sub>3</sub>):** δ 190.8 (t, *J* = 28.7 Hz), 145.8, 139.6, 136.6, 134.7, 130.2 (t, *J* = 6.0 Hz), 128.5, 128.3, 127.6, 126.7, 125.6, 125.5, 120.7 (t, *J* = 262.7 Hz), 50.4 (t, *J* = 21.1 Hz), 37.1, 36.9, 31.7, 22.7, 22.6, 22.3, 13.9.

**<sup>19</sup>F NMR (565 MHz, CDCl<sub>3</sub>)** δ -104.3 (s, 2F).

**IR (neat):** 2955, 2928, 2870, 1691, 1596, 1446, 1272, 1094, 1049, 889, 714, 687.

**HRMS (ESI-TOF):** calculated for [C<sub>26</sub>H<sub>28</sub>F<sub>2</sub>OSNa (M + Na<sup>+</sup>): 449.1721, found: 449.1722.

**2-(2-(butylthio)-5-(chloromethyl)-1,3-dimethylcyclohexa-2,5-dien-1-yl)-2,2-difluoro-1-phenylethan-1-one (3f):**

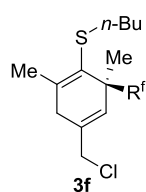

Following the general procedure A, the title compound was obtained as light yellow oil, 84 mg, 71% yield. (R<sub>f</sub> = 0.30, eluent: PE/EtOAc = 10/1).

**<sup>1</sup>H NMR (600 MHz, CDCl<sub>3</sub>):** δ 7.93 (d, *J* = 7.7 Hz, 2H), 7.57 – 7.53 (m, 1H), 7.45 – 7.38 (m, 2H), 5.73 (s, 1H), 3.96 (d, *J* = 11.6 Hz, 1H), 3.90 (d, *J* = 11.6 Hz, 1H), 2.77 (d, *J* = 22.2 Hz, 1H), 2.62 – 2.48 (m, 3H), 1.96 (s, 3H), 1.63 (s, 3H), 1.52 – 1.46 (m, 2H), 1.40 – 1.33 (m, 2H), 0.88 (t, *J* = 7.3 Hz, 3H).

**<sup>13</sup>C NMR (151 MHz, CDCl<sub>3</sub>):** δ 190.6 (t, *J* = 28.7 Hz), 145.2, 134.6, 134.1, 133.7, 130.2 (t, *J* = 6.0 Hz), 128.4, 128.3, 126.5, 120.7 (t, *J* = 262.7 Hz), 50.2 (t, *J* = 21.1 Hz), 47.8, 36.9, 35.5, 31.6, 22.5, 22.2, 22.1, 13.9.

**<sup>19</sup>F NMR (565 MHz, CDCl<sub>3</sub>)** δ -103.9 (d, *J* = 254.3 Hz, 1F), -104.5 (d, *J* = 254.3 Hz, 1F).

**IR (neat):** 2956, 2929, 2870, 1691, 1596, 1446, 1262, 1100, 1045, 906, 715, 687.

**HRMS (ESI-TOF):** calculated for [C<sub>21</sub>H<sub>25</sub>ClF<sub>2</sub>OSNa (M + Na<sup>+</sup>): 421.1175, found: 421.1174.

**2-(2-(butylthio)-5-(methoxymethyl)-1,3-dimethylcyclohexa-2,5-dien-1-yl)-2,2-difluoro-1-phenylethan-1-one (3g):**

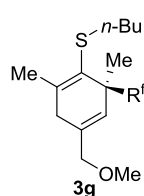

Following the general procedure A, the title compound was obtained as light yellow oil, 85 mg, 72% yield. (R<sub>f</sub> = 0.43, eluent: PE/EtOAc = 10/1).

**<sup>1</sup>H NMR (600 MHz, CDCl<sub>3</sub>):** δ 7.93 (d, *J* = 7.8 Hz, 2H), 7.56 – 7.51 (m, 1H), 7.42 – 7.38 (m, 2H), 5.63 (s, 1H), 3.77 (d, *J* = 12.1 Hz, 1H), 3.73 (d, *J* = 12.1 Hz, 1H), 3.26 (s, 3H), 2.65 (d, *J* = 22.3 Hz, 1H), 2.56 – 2.45 (m, 3H), 1.92 (s, 3H), 1.63 (s, 3H), 1.51 – 1.44 (m, 2H), 1.38 – 1.31 (m, 2H), 0.86 (t, *J* = 7.3 Hz, 3H).

**<sup>13</sup>C NMR (151 MHz, CDCl<sub>3</sub>):** δ 190.8 (t, *J* = 28.7 Hz), 145.7, 135.0, 134.7, 133.5, 130.2 (t, *J* = 6.0 Hz), 128.3, 126.7, 125.9, 120.5 (t, *J* = 262.7 Hz), 75.2, 58.0, 50.0 (t, *J* = 21.1 Hz), 36.9, 35.4, 31.6, 22.5, 22.3, 22.2, 13.8.

**<sup>19</sup>F NMR (565 MHz, CDCl<sub>3</sub>)** δ -104.0 (d, *J* = 254.3 Hz, 1F), -104.6 (d, *J* = 254.3 Hz, 1F).

**IR (neat):** 2956, 2929, 2870, 1691, 1596, 1446, 1262, 1100, 1045, 906, 715, 687.

**HRMS (ESI-TOF):** calculated for [C<sub>22</sub>H<sub>28</sub>F<sub>2</sub>O<sub>2</sub>SNa (M + Na<sup>+</sup>): 417.1670, found: 417.1667.

**(4-(butylthio)-3-(1,1-difluoro-2-oxo-2-phenylethyl)-3,5-dimethylcyclohexa-1,4-dien-1-yl)methyl cinnamate (3h):**

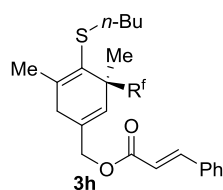

Following the general procedure A, the title compound was obtained as light yellow oil, 109 mg, 68% yield. (R<sub>f</sub> = 0.33, eluent: PE/EtOAc = 10/1).

**<sup>1</sup>H NMR (600 MHz, CDCl<sub>3</sub>):** δ 7.95 (d, *J* = 7.6 Hz, 2H), 7.69 (d, *J* = 16.0 Hz, 1H), 7.55 – 7.51 (m, 3H), 7.43 – 7.36 (m, 5H), 6.44 (d, *J* = 16.0 Hz, 1H), 5.74 (s, 1H), 4.55 (s, 2H), 2.66 (d, *J* = 22.3 Hz, 1H), 2.60 – 2.50 (m, 3H), 1.97 (s, 3H), 1.66 (s, 3H), 1.54 – 1.47 (m, 2H), 1.40 – 1.34 (m, 2H), 0.88 (t, *J* = 7.3 Hz, 3H).

**<sup>13</sup>C NMR (151 MHz, CDCl<sub>3</sub>):** δ 190.6 (t, *J* = 28.7 Hz), 166.6, 145.4, 145.0, 134.6, 134.3, 133.6, 133.1, 130.5, 130.2 (t, *J* = 6.0 Hz), 129.0, 128.3, 128.2, 127.0, 126.8, 120.4 (t, *J* = 262.7 Hz), 117.7, 66.5, 49.9 (t, *J* = 21.1 Hz), 36.8, 35.4, 31.6, 22.5, 22.2, 13.8.

**<sup>19</sup>F NMR (565 MHz, CDCl<sub>3</sub>)** δ -104.4 (s, 2F).



**IR (neat):** 2955, 2928, 2870, 1710, 1692, 1635, 1596, 1447, 1154, 1094, 766, 713.

**HRMS (ESI-TOF):** calculated for [C<sub>30</sub>H<sub>32</sub>F<sub>2</sub>O<sub>3</sub>SNa (M + Na<sup>+</sup>): 533.1932, found: 533.1931.

**methyl**

**4-(butylthio)-3-(1,1-difluoro-2-oxo-2-phenylethyl)-3,5-dimethylcyclohexa-1,4-diene-1-carboxylate (3i):**

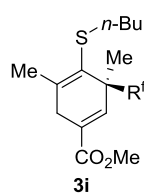

Following the general procedure A, the title compound was obtained as light yellow oil, 73 mg, 59% yield. (R<sub>f</sub> = 0.41, eluent: PE/EtOAc = 10/1).

**<sup>1</sup>H NMR (600 MHz, CDCl<sub>3</sub>):** δ 7.93 (d, *J* = 7.8 Hz, 2H), 7.56 – 7.52 (m, 1H), 7.43 – 7.38 (m, 2H), 6.83 (d, *J* = 2.4 Hz, 1H), 3.73 (s, 3H), 3.00 (d, *J* = 22.8 Hz, 1H),

2.77 (d, *J* = 22.8, 1H), 2.53 – 2.43 (m, 2H), 1.97 (s, 3H), 1.67 (s, 3H), 1.48 – 1.42 (m, 2H), 1.38 – 1.30 (m, 2H), 0.85 (t, *J* = 7.3 Hz, 3H).

**<sup>13</sup>C NMR (151 MHz, CDCl<sub>3</sub>):** δ 190.1 (t, *J* = 28.7 Hz), 166.3, 145.8, 138.8, 134.2, 133.8, 130.2 (t, *J* = 6.0 Hz), 129.4, 128.4, 125.8, 119.9 (t, *J* = 262.7 Hz), 52.0, 50.8 (t, *J* = 21.1 Hz), 36.9, 34.0, 31.5, 22.6, 22.2, 21.9, 13.9

**<sup>19</sup>F NMR (565 MHz, CDCl<sub>3</sub>)** δ -103.2 (d, *J* = 254.3 Hz, 1F), -104.2 (d, *J* = 254.3 Hz, 1F).

**IR (neat):** 2954, 2871, 1717, 1692, 1596, 1436, 1267, 1100, 1044, 906, 711,

**HRMS (ESI-TOF):** calculated for [C<sub>22</sub>H<sub>26</sub>F<sub>2</sub>O<sub>3</sub>SNa (M + Na<sup>+</sup>): 431.1463, found: 431.1458.

**4-(butylthio)-3-(1,1-difluoro-2-oxo-2-phenylethyl)-3,5-dimethylcyclohexa-1,4-diene-1-carbonitrile (3j):**

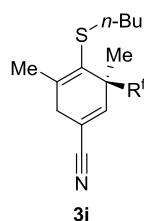

Following the general procedure A, the title compound was obtained as light yellow oil, 45 mg, 40% yield. (R<sub>f</sub> = 0.19, eluent: PE/EtOAc = 10/1).

**<sup>1</sup>H NMR (600 MHz, CDCl<sub>3</sub>):** δ 7.95 (d, *J* = 7.7 Hz, 2H), 7.61 – 7.58 (m, 1H), 7.48 – 7.42 (m, 2H), 6.58 (s, 1H), 2.88 (s, 2H), 2.53 – 2.45 (m, 2H), 2.01 (s, 3H), 1.66 (s, 3H), 1.49 – 1.43 (m, 2H), 1.36 – 1.30 (m, 2H), 0.86 (t, *J* = 7.3 Hz, 3H).

**<sup>13</sup>C NMR (151 MHz, CDCl<sub>3</sub>):** δ 189.4 (t, *J* = 28.7 Hz), 144.4, 143.7, 134.2, 133.7, 130.2 (t, *J* = 6.0 Hz), 128.6, 126.3, 119.3 (t, *J* = 262.7 Hz), 117.4, 112.2, 50.5 (t, *J* = 21.1 Hz), 36.9, 35.6, 31.5, 22.4, 22.1, 21.8, 13.8.

**<sup>19</sup>F NMR (565 MHz, CDCl<sub>3</sub>)** δ -102.7 (d, *J* = 254.3 Hz, 1F), -103.4 (d, *J* = 254.3 Hz, 1F).

**IR (neat):** 2957, 2930, 2871, 2221, 1691, 1596, 1447, 1274, 1108, 1044, 907, 715.

**HRMS (ESI-TOF):** calculated for [C<sub>21</sub>H<sub>23</sub>F<sub>2</sub>NOSNa (M + Na<sup>+</sup>)]: 398.1361, found: 398.1359.

**2-(2-(butylthio)-1,3-dimethyl-5-(phenylethynyl)cyclohexa-2,5-dien-1-yl)-2,2-difluoro-1-phenylethanol (3k):**

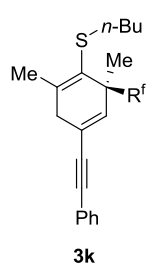

Following the general procedure A, the title compound was obtained as light yellow oil, 71.5 mg, 53% yield. (R<sub>f</sub> = 0.21, eluent: PE/EtOAc = 30/1).

**<sup>1</sup>H NMR (600 MHz, CDCl<sub>3</sub>):** δ 7.98 (d, *J* = 7.7 Hz, 2H), 7.58 – 7.54 (m, 1H), 7.46 – 7.39 (m, 4H), 7.33 – 7.28 (m, 3H), 6.11 (s, 1H), 2.90 – 2.78 (m, 2H), 2.57 – 2.49 (m, 2H), 1.98 (s, 3H), 1.67 (s, 3H), 1.53 – 1.46 (m, 2H), 1.39 – 1.33 (m, 2H), 0.88 (t, *J* = 7.3 Hz, 3H).

**<sup>13</sup>C NMR (151 MHz, CDCl<sub>3</sub>):** δ 190.4 (t, *J* = 28.7 Hz), 145.5, 134.6, 134.4, 133.7, 133.2, 131.8, 131.6, 130.2, 130.2 (t, *J* = 6.0 Hz), 128.6, 123.1, 122.0, 120.4 (t, *J* = 262.7 Hz), 89.8, 88.4, 50.6 (t, *J* = 21.1 Hz), 38.6, 37.0, 31.6, 22.5, 22.3, 22.2, 13.8.

**<sup>19</sup>F NMR (565 MHz, CDCl<sub>3</sub>)** δ -103.4 (d, *J* = 254.3 Hz, 1F), -104.0 (d, *J* = 254.3 Hz, 1F).

**IR (neat):** 2955, 2926, 2870, 1691, 1596, 1447, 1272, 1100, 1044, 754, 687.

**HRMS (ESI-TOF):** calculated for [C<sub>28</sub>H<sub>28</sub>F<sub>2</sub>OSNa (M + Na<sup>+</sup>)]: 473.1721, found: 473.1722.

**2-(5-bromo-2-(butylthio)-1,3-dimethylcyclohexa-2,5-dien-1-yl)-2,2-difluoro-1-phenylethanol (3l):**

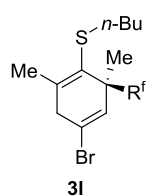

Following the general procedure A, the title compound was obtained as light yellow oil, 83 mg, 65% yield. (R<sub>f</sub> = 0.32, eluent: PE/EtOAc = 30/1).

**<sup>1</sup>H NMR (600 MHz, CDCl<sub>3</sub>):** δ 7.94 (d, *J* = 7.8 Hz, 2H), 7.58 – 7.55 (m, 1H), 7.46 – 7.42 (m, 2H), 6.01 (s, 1H), 3.01 – 2.85 (m, 2H), 2.59 – 2.46 (m, 2H), 1.95 (s, 3H), 1.63 (s, 3H), 1.53 – 1.44 (m, 2H), 1.38 – 1.32 (m, 2H), 0.87 (t, *J* = 7.3 Hz, 3H).

**<sup>13</sup>C NMR (151 MHz, CDCl<sub>3</sub>):** δ 190.2 (t, *J* = 28.7 Hz), 145.0, 134.4, 133.8, 130.2 (t, *J* = 6.0 Hz), 129.9, 128.4, 126.6, 121.6, 119.6 (t, *J* = 262.7 Hz), 52.7 (t, *J* = 21.1 Hz), 43.5, 36.8, 31.6, 22.2, 22.1, 22.0, 13.8.

**<sup>19</sup>F NMR (565 MHz, CDCl<sub>3</sub>)** δ -103.7 (d, *J* = 254.3 Hz, 1F), -104.2 (d, *J* = 254.3 Hz, 1F).

**IR (neat):** 2955, 2928, 2870, 1691, 1596, 1447, 1271, 1097, 1047, 712, 662.

**HRMS (ESI-TOF):** calculated for [C<sub>20</sub>H<sub>23</sub>BrF<sub>2</sub>OSNa (M + Na<sup>+</sup>): 451.0513, found: 451.0512.

**2-(2-(butylthio)-1,3-diethylcyclohexa-2,5-dien-1-yl)-2,2-difluoro-1-phenylethan-1-one (3m):**

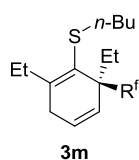

Following the general procedure A, the title compound was obtained as light yellow oil, 70 mg, 62% yield. (R<sub>f</sub> = 0.41, eluent: PE/EtOAc = 10/1).

**<sup>1</sup>H NMR (600 MHz, CDCl<sub>3</sub>):** δ 7.98 (d, *J* = 7.8 Hz, 2H), 7.56 – 7.52 (m, 1H), 7.44 – 7.38 (m, 2H), 5.96 – 5.80 (m, 1H), 5.49 (d, *J* = 10.0, 1H), 2.72 – 2.51 (m, 6H), 2.43 – 2.36 (m, 1H), 1.80 – 1.73 (m, 1H), 1.56 – 1.49 (m, 2H), 1.41 – 1.34 (m, 2H), 0.97 (t, *J* = 7.6 Hz, 3H), 0.89 (t, *J* = 7.4 Hz, 3H), 0.72 (t, *J* = 7.4 Hz, 3H).

**<sup>13</sup>C NMR (151 MHz, CDCl<sub>3</sub>):** δ 191.0 (t, *J* = 28.7 Hz), 152.3, 134.9, 133.5, 130.4 (t, *J* = 6.0 Hz), 129.3, 127.1, 124.6, 120.5 (t, *J* = 262.7 Hz), 53.8 (t, *J* = 21.1 Hz), 37.0, 31.9, 31.8, 29.4, 25.2, 22.3, 13.9, 12.7, 8.9.

**<sup>19</sup>F NMR (565 MHz, CDCl<sub>3</sub>)** δ -102.5 (d, *J* = 254.3 Hz, 1F), -103.4 (d, *J* = 254.3 Hz, 1F).

**IR (neat):** 2955, 2928, 2870, 1691, 1596, 1447, 1271, 1097, 1047, 712, 662.

**HRMS (ESI-TOF):** calculated for [C<sub>22</sub>H<sub>28</sub>F<sub>2</sub>OSNa (M + Na<sup>+</sup>): 401.1721, found: 401.1726.

**2-(2-(butylthio)-3-ethyl-1-methylcyclohexa-2,5-dien-1-yl)-2,2-difluoro-1-phenylethan-1-one (3n):**

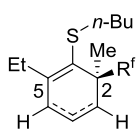

**3n(C2/C5 65/35)**

Following the general procedure A, the title compound was obtained as a mixture of C2/C5 65/35, light yellow oil, 69 mg, 63% yield. (R<sub>f</sub> = 0.32, eluent: PE/EtOAc = 30/1).

**<sup>1</sup>H NMR (600 MHz, CDCl<sub>3</sub>):** δ 8.00 – 7.94 (m, 2H), 7.57 – 7.52 (m, 1H), 7.44 – 7.37 (m, 2H), 5.88 – 5.83 (m, 3H), 5.68 (d, *J* = 9.8 Hz, 0.66H), 5.49 (d, *J* = 10.0 Hz, 0.32H), 2.69 – 2.51 (m, 5H), 2.30 – 2.24 (m, 0.66H), 1.95 (s, 1H), 1.77 – 1.73 (m, 0.38H), 1.64 (s, 2.14H), 1.55 – 1.46 (m, 2H), 1.40 – 1.30 (m, 2H), 0.92 – 0.84 (m, 5H), 0.74 – 0.70 (t, *J* = 7.4 Hz, 1H).

**<sup>13</sup>C NMR (151 MHz, CDCl<sub>3</sub>):** δ 191.2 (t, *J* = 28.7 Hz), 190.7 (t, *J* = 28.7 Hz), 151.7, 146.3, 134.9, 134.6, 133.6, 133.4, 130.4 (t, *J* = 6.0 Hz), 130.2 (t, *J* = 6.0 Hz), 128.8, 128.3, 128.2, 128.1, 127.2, 126.9, 126.2, 125.4, 120.6 (t, *J* = 262.7 Hz), 120.5 (t, *J* = 262.7 Hz), 53.7 (t, *J* = 21.1 Hz), 49.8 (t, *J* = 21.1 Hz), 38.1, 36.2, 34.9, 31.9, 31.7, 31.6, 29.2, 25.2, 22.9, 22.4, 22.3, 13.9, 13.8, 12.4, 8.9.

**<sup>19</sup>F NMR (565 MHz, CDCl<sub>3</sub>)** δ -103.0 – -104.8 (m, 2F).

**IR (neat):** 2959, 2931, 2872, 1691, 1596, 1447, 1059, 907, 729, 686.

**HRMS (ESI-TOF):** calculated for [C<sub>21</sub>H<sub>26</sub>F<sub>2</sub>OSNa (M + Na<sup>+</sup>): 387.1565, found: 387.1562.

**2-(2-(butylthio)-3-methyl-3,6-dihydro-[1,1'-biphenyl]-3-yl)-2,2-difluoro-1-phenylethan-1-one**

**(3o):**

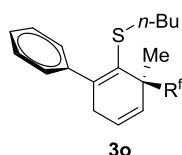

Following the general procedure A, the title compound was obtained as light yellow oil, 91.5 mg, 74% yield. (R<sub>f</sub> = 0.27, eluent: PE/EtOAc = 30/1).

**<sup>1</sup>H NMR (600 MHz, CDCl<sub>3</sub>):** δ 8.10 (d, *J* = 7.7 Hz, 2H), 7.62 – 7.62 (m, 1H), 7.48 – 7.43 (m, 2H), 7.32 – 7.27 (m, 2H), 7.26 – 7.23 (m, 1H), 7.14 – 7.11 (m,

2H), 5.92 – 5.87 (m, 1H), 5.77 (d, *J* = 9.9 Hz, 1H), 3.04 – 2.77 (m, 2H), 2.17 – 2.03 (m, 2H), 1.71 (s, 3H), 1.19 – 1.01 (m, 4H), 0.70 (t, *J* = 7.3 Hz, 3H).

**<sup>13</sup>C NMR (151 MHz, CDCl<sub>3</sub>):** δ 191.6 (t, *J* = 28.7 Hz), 147.0, 142.6, 133.8, 130.4 (t, *J* = 6.0 Hz), 129.7, 128.7, 128.5, 129.1, 128.0, 127.7, 127.1, 126.9, 120.5 (t, *J* = 262.7 Hz), 49.4 (t, *J* = 21.1 Hz), 36.2, 36.1, 31.2, 22.5, 21.9, 13.6.

**<sup>19</sup>F NMR (565 MHz, CDCl<sub>3</sub>)** δ -103.5 (d, *J* = 254.3 Hz, 1F), -104.2 (d, *J* = 254.3 Hz, 1F).

**IR (neat):** 2959, 2931, 2872, 1691, 1596, 1447, 1059, 907, 729, 686.

**HRMS (ESI-TOF):** calculated for [C<sub>25</sub>H<sub>26</sub>F<sub>2</sub>OSNa (M + Na<sup>+</sup>): 435.1565, found: 435.1559.

**2-(2-(butylthio)-3-(methoxymethyl)-1-methylcyclohexa-2,5-dien-1-yl)-2,2-difluoro-1-phenylethan-1-one (3p):**

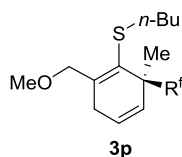

Following the general procedure A, the title compound was obtained as light yellow oil, 63 mg, 55% yield. (R<sub>f</sub> = 0.20, eluent: PE/EtOAc = 10/1).

**<sup>1</sup>H NMR (600 MHz, CDCl<sub>3</sub>):** δ 7.98 (d, *J* = 7.8 Hz, 2H), 7.57 – 7.54 (m, 1H), 7.44 – 7.39 (m, 2H), 5.91 – 5.87 (m, 1H), 5.66 (d, *J* = 9.8 Hz, 1H), 4.33 (d, *J* =

11.9 Hz, 1H), 4.24 (d, *J* = 11.9 Hz, 1H), 3.26 (s, 3H), 2.88 (dd, *J* = 23.1, 4.5 Hz, 1H), 2.67 (d, *J* = 23.2 Hz, 1H), 2.57 – 2.52 (m, 2H), 1.64 (s, 3H), 1.52 – 1.47 (m, 2H), 1.39 – 1.32 (m, 2H), 0.88 (t, *J* = 7.3 Hz, 3H).

**<sup>13</sup>C NMR (151 MHz, CDCl<sub>3</sub>):** δ 190.6 (t, *J* = 28.7 Hz), 146.8, 134.6, 133.7, 130.4 (t, *J* = 6.0 Hz), 130.2, 128.4, 127.2, 120.4 (t, *J* = 262.7 Hz), 73.9, 58.3, 49.6 (t, *J* = 21.1 Hz), 38.2, 31.6, 30.5, 22.4, 22.2, 13.8.

<sup>19</sup>F NMR (565 MHz, CDCl<sub>3</sub>) δ -103.7 (d, *J* = 254.3 Hz, 1F), -104.3 (d, *J* = 254.3 Hz, 1F).

IR (neat): 2956, 2927, 2871, 1691, 1596, 1447, 1275, 1091, 1045, 910, 713, 686.

HRMS (ESI-TOF): calculated for [C<sub>21</sub>H<sub>26</sub>F<sub>2</sub>O<sub>2</sub>SNa (M + Na<sup>+</sup>)]: 403.1514, found: 403.1508

**(2-(butylthio)-3-(1,1-difluoro-2-oxo-2-phenylethyl)-3-methylcyclohexa-1,4-dien-1-yl)methyl 4-chlorobutanoate (3q):**

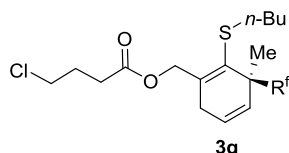

Following the general procedure A, the title compound was obtained as light yellow oil, 76 mg, 54% yield. (*R*<sub>f</sub> = 0.37, eluent: PE/EtOAc = 10/1).

<sup>1</sup>H NMR (600 MHz, CDCl<sub>3</sub>): δ 7.97 (d, *J* = 7.8 Hz, 2H), 7.59 – 7.55 (m, 1H), 7.45 – 7.41 (m, 2H), 5.92 – 5.84 (m, 1H), 5.68 (d, *J* = 9.8 Hz, 1H), 5.02 (d, *J* = 12.7 Hz, 1H), 4.94 (d, *J* = 12.7 Hz, 1H), 3.61 (t, *J* = 6.3 Hz, 2H), 2.78 – 2.72 (m, 1H), 2.68 – 2.61 (m, 1H), 2.59 – 2.54 (m, 2H), 2.51 (t, *J* = 7.2 Hz, 2H), 2.16 – 2.04 (m, 2H), 1.65 (s, 3H), 1.53 – 1.47 (m, 2H), 1.37 – 1.32 (m, 2H), 0.87 (t, *J* = 7.3 Hz, 3H).

<sup>13</sup>C NMR (151 MHz, CDCl<sub>3</sub>): δ 190.4 (t, *J* = 28.7 Hz), 172.5, 144.0, 134.5, 133.8, 132.2, 130.4 (t, *J* = 6.0 Hz), 128.6, 128.4, 126.5, 120.2 (t, *J* = 262.7 Hz), 66.2, 49.7 (t, *J* = 21.1 Hz), 44.2, 38.3, 31.6, 31.2, 30.5, 27.7, 22.3, 22.2, 13.8.

<sup>19</sup>F NMR (565 MHz, CDCl<sub>3</sub>) δ -103.7 (d, *J* = 254.3 Hz, 1F), -104.4 (d, *J* = 254.3 Hz, 1F).

IR (neat): 2957, 2927, 2871, 1734, 1691, 1596, 1447, 1169, 1094, 1044, 912, 714, 687.

HRMS (ESI-TOF): calculated for [C<sub>24</sub>H<sub>29</sub>ClF<sub>2</sub>O<sub>3</sub>SNa (M + Na<sup>+</sup>)]: 493.1386, found: 493.1384.

**(2-(butylthio)-3-(1,1-difluoro-2-oxo-2-phenylethyl)-3-methylcyclohexa-1,4-dien-1-yl)methyl ethyl maleate (3r):**

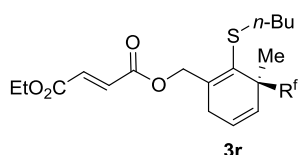

Following the general procedure A, the title compound was obtained as light yellow oil, 84 mg, 57% yield. (*R*<sub>f</sub> = 0.34, eluent: PE/EtOAc = 10/1).

<sup>1</sup>H NMR (600 MHz, CDCl<sub>3</sub>): δ 7.97 (d, *J* = 7.7 Hz, 2H), 7.57 – 7.54 (m, 1H), 7.44 – 7.40 (m, 2H), 6.83 (s, 2H), 5.88 – 5.85 (m, 1H), 5.68 (dd, *J* = 9.8, 2.4 Hz, 1H), 5.11 (d, *J* = 12.7 Hz, 1H), 5.05 (d, *J* = 12.8 Hz, 1H), 4.26 (q, *J* = 7.1 Hz, 2H), 2.77 – 2.72 (m, 1H), 2.67 – 2.61 (m, 1H), 2.60 – 2.55 (m, 2H), 1.65 (s, 3H), 1.53 – 1.46 (m, 2H), 1.36 – 1.28 (m, 5H),

0.86 (t,  $J = 7.4$  Hz, 3H).

**$^{13}\text{C}$  NMR (151 MHz,  $\text{CDCl}_3$ ):**  $\delta$  190.3 (t,  $J = 28.7$  Hz), 164.9, 164.7, 143.5, 134.4, 134.3, 133.8, 133.1, 132.7, 130.3 (t,  $J = 6.0$  Hz), 128.5, 128.4, 126.3, 120.1 (t,  $J = 262.7$  Hz), 66.8, 61.5, 49.7 (t,  $J = 21.1$  Hz), 38.3, 31.6, 30.5, 22.2, 22.1, 14.2, 13.8.

**$^{19}\text{F}$  NMR (565 MHz,  $\text{CDCl}_3$ )**  $\delta$  -103.8 (d,  $J = 254.3$  Hz, 1F), -104.3 (d,  $J = 254.3$  Hz, 1F).

**IR (neat):** 2957, 2927, 2871, 1734, 1691, 1596, 1447, 1169, 1094, 1044, 912, 714, 687.

**HRMS (ESI-TOF):** calculated for  $[\text{C}_{26}\text{H}_{30}\text{F}_2\text{O}_5\text{SNa} (\text{M} + \text{Na}^+)]$ : 515.1674, found: 515.1670.

**(2-(butylthio)-3-(1,1-difluoro-2-oxo-2-phenylethyl)-3-methylcyclohexa-1,4-dien-1-yl)methyl 5-chlorothiophene-2-carboxylate (3s):**

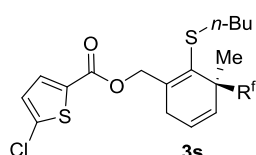

Following the general procedure A, the title compound was obtained as light yellow oil, 79.5 mg, 52% yield. ( $R_f = 0.51$ , eluent: PE/EtOAc = 10/1).

**$^1\text{H}$  NMR (600 MHz,  $\text{CDCl}_3$ ):**  $\delta$  7.98 (d,  $J = 7.8$  Hz, 2H), 7.60 – 7.52 (m, 2H), 7.41 (t,  $J = 7.8$  Hz, 2H), 6.95 (d,  $J = 4.0$  Hz, 1H), 5.91 – 5.85 (m, 1H), 5.69 (dd,  $J = 9.8, 2.4$  Hz, 1H), 5.19 (d,  $J = 12.8$  Hz, 1H), 5.13 (d,  $J = 12.8$  Hz, 1H), 2.85 – 2.79 (m, 1H), 2.73 – 2.67 (m, 1H), 2.64 – 2.57 (m, 2H), 1.67 (s, 3H), 1.55 – 1.48 (m, 2H), 1.37 – 1.32 (m, 2H), 0.87 (t,  $J = 7.4$  Hz, 3H).

**$^{13}\text{C}$  NMR (151 MHz,  $\text{CDCl}_3$ ):**  $\delta$  190.5 (t,  $J = 28.7$  Hz), 160.9, 143.8, 137.8, 134.5, 133.8, 133.4, 132.4, 131.5, 130.3 (t,  $J = 6.0$  Hz), 128.5, 128.4, 127.5, 126.4, 120.2 (t,  $J = 262.7$  Hz), 66.6, 49.7 (t,  $J = 21.1$  Hz), 38.2, 31.7, 30.5, 22.2, 22.1, 13.8.

**$^{19}\text{F}$  NMR (565 MHz,  $\text{CDCl}_3$ )**  $\delta$  -103.8 (d,  $J = 254.3$  Hz, 1F), -104.4 (d,  $J = 204.3$  Hz, 1F).

**IR (neat):** 2956, 2928, 2871, 1707, 1691, 1596, 1447, 1421, 1274, 1243, 1085, 909, 737, 686.

**HRMS (ESI-TOF):** calculated for  $[\text{C}_{25}\text{H}_{25}\text{ClF}_2\text{O}_3\text{S}_2\text{Na} (\text{M} + \text{Na}^+)]$ : 533.0794, found: 533.0794.

**2-(2-(butylthio)-3-chloro-1-methylcyclohexa-2,5-dien-1-yl)-2,2-difluoro-1-phenylethan-1-one (3t):**

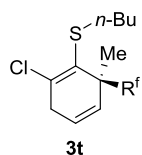

Following the general procedure A, the title compound was obtained as light yellow oil, 63 mg, 55% yield. ( $R_f = 0.41$ , eluent: PE/EtOAc = 10/1).

**<sup>1</sup>H NMR (600 MHz, CDCl<sub>3</sub>):** δ 7.98 (d, *J* = 7.8 Hz, 2H), 7.60 – 7.56 (m, 1H), 7.47 – 7.43 (m, 2H), 5.79 – 5.74 (m, 1H), 5.67 (d, *J* = 9.9 Hz, 1H), 3.06 – 2.96 (m, 2H), 2.78 (t, *J* = 7.5 Hz, 2H), 1.64 (s, 3H), 1.57 – 1.48 (m, 2H), 1.41 – 1.35 (m, 2H), 0.88 (t, *J* = 7.3 Hz, 3H).

**<sup>13</sup>C NMR (151 MHz, CDCl<sub>3</sub>):** δ 190.1 (t, *J* = 28.7 Hz), 142.4, 134.3, 133.9, 130.3 (t, *J* = 6.0 Hz), 128.5, 128.4, 125.9, 119.6 (t, *J* = 262.7 Hz), 51.1 (t, *J* = 21.1 Hz), 37.2, 35.7, 31.5, 22.4, 22.2, 13.8.

**<sup>19</sup>F NMR (565 MHz, CDCl<sub>3</sub>)** δ -103.1 (d, *J* = 254.3 Hz, 1F), -104.1 (d, *J* = 254.3 Hz, 1F).

**IR (neat):** 2959, 2920, 2870, 1705, 1596, 1447, 1271, 1097, 1047, 712, 660.

**HRMS (ESI-TOF):** calculated for [C<sub>19</sub>H<sub>21</sub>ClF<sub>2</sub>OSNa (M + Na<sup>+</sup>): 393.0862, found: 393.0866.

**2,2'-(2-(butylthio)-1,3-dimethylcyclohexa-2,5-diene-1,4-diyl)bis(2,2-difluoro-1-phenylethan-1-one) (4a):**

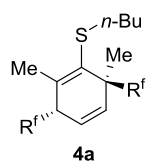

Following the general procedure B, the title compound was obtained as light yellow oil, 110 mg, 73% yield. (*R*<sub>f</sub> = 0.46, eluent: PE/EtOAc = 10/1).

**<sup>1</sup>H NMR (600 MHz, CDCl<sub>3</sub>):** δ 8.01 (d, *J* = 7.9 Hz, 2H), 7.90 (d, *J* = 7.9 Hz, 2H), 7.64 – 7.62 (m, 1H), 7.56 – 7.54 (m, 1H), 7.49 – 7.47 (m, 2H), 7.44 – 7.42 (m, 2H), 5.95 (d, *J* = 10.3 Hz, 1H), 5.70 (dd, *J* = 10.3, 3.4 Hz, 1H), 3.62 – 3.58 (m, 1H), 2.60 – 2.58 (m, 1H), 2.47 – 2.43 (m, 1H), 2.05 (s, 3H), 1.57 (s, 3H), 1.54 – 1.47 (m, 2H), 1.41 – 1.33 (m, 2H), 0.88 (t, *J* = 7.3 Hz, 3H).

**<sup>13</sup>C NMR (151 MHz, CDCl<sub>3</sub>):** δ 190.5 (t, *J* = 28.7 Hz), 189.2 (t, *J* = 28.7 Hz), 138.0, 134.8, 134.5, 134.4, 133.5, 132.8, 132.6, 130.2 (t, *J* = 3.0 Hz), 130.0 (t, *J* = 3.0 Hz), 128.9, 128.4, 121.3 (t, *J* = 6.0 Hz), 119.6 (t, *J* = 255.2 Hz), 118.6 (t, *J* = 255.2 Hz), 49.7 (t, *J* = 21.1 Hz), 47.7 (t, *J* = 21.1 Hz), 36.5, 31.6, 23.1, 22.3, 22.2, 13.8.

**<sup>19</sup>F NMR (565 MHz, CDCl<sub>3</sub>)** δ -97.9 (d, *J* = 273.5 Hz, 1F), -100.9 (d, *J* = 273.5 Hz, 1F), -103.7 (d, *J* = 259.9 Hz, 1F), -103.8 (d, *J* = 259.9 Hz, 1F).

**IR (neat):** 3057, 2958, 2930, 2872, 1694, 1597, 1448, 1101, 1043, 912, 821.

**HRMS (ESI-TOF):** calculated for [C<sub>28</sub>H<sub>28</sub>F<sub>4</sub>O<sub>2</sub>SNa (M + Na<sup>+</sup>): 527.1638, found: 527.1664.

**2,2'-(1,3-dimethyl-2-(methylthio)cyclohexa-2,5-diene-1,4-diyl)bis(2,2-difluoro-1-phenylethan-1-one) (4b):**

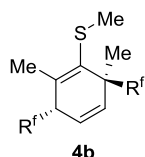

Following the general procedure B, the title compound was obtained as light yellow oil, 76 mg, 55% yield. (Rf = 0.44, eluent: PE/EtOAc = 10/1).

**<sup>1</sup>H NMR (600 MHz, CDCl<sub>3</sub>):** δ 8.01 (d, *J* = 7.9 Hz, 2H), 7.90 (d, *J* = 7.9 Hz, 2H), 7.65 – 7.60 (m, 1H), 7.57 – 7.54 (m, 1H), 7.50 – 7.46 (m, 2H), 7.44 – 7.40 (m, 2H),

5.95 (d, *J* = 10.3 Hz, 1H), 5.70 (dd, *J* = 10.3, 3.4 Hz, 1H), 3.66 – 3.59 (m, 1H), 2.60 – 2.58 (m, 1H), 2.47 – 2.43 (m, 1H), 2.09 – 2.07 (m, 6H), 1.57 (s, 3H).

**<sup>13</sup>C NMR (151 MHz, CDCl<sub>3</sub>):** δ 190.5 (t, *J* = 28.7 Hz), 189.2 (t, *J* = 28.7 Hz), 138.3, 135.4, 134.8, 134.5, 133.6, 132.8, 132.5, 130.2 (t, *J* = 3.0 Hz), 130.0 (t, *J* = 3.0 Hz), 128.9, 128.4, 121.4, 119.6 (t, *J* = 255.2 Hz), 118.6 (t, *J* = 255.2 Hz), 49.9 (t, *J* = 21.1 Hz), 47.7 (t, *J* = 21.1 Hz), 22.6, 21.9, 19.7.

**<sup>19</sup>F NMR (565 MHz, CDCl<sub>3</sub>)** δ -97.7 (d, *J* = 273.5 Hz, 1F), -100.2 (d, *J* = 273.5 Hz, 1F), -103.4 (d, *J* = 259.9 Hz, 1F), -103.9 (d, *J* = 259.9 Hz, 1F).

**IR (neat):** 3063, 2988, 2924, 1693, 1596, 1448, 1101, 1043, 714, 685, 672.

**HRMS (ESI-TOF):** calculated for [C<sub>25</sub>H<sub>22</sub>F<sub>4</sub>O<sub>2</sub>SNa (M + Na<sup>+</sup>): 485.1169, found: 485.1191.

**2,2'-(1,3-dimethyl-2-((4-phenylbutyl)thio)cyclohexa-2,5-diene-1,4-diyl)bis(2,2-difluoro-1-phenylethan-1-one) (4c):**

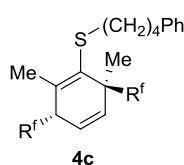

Following the general procedure B, the title compound was obtained as light yellow oil, 104 mg, 60% yield. (Rf = 0.44, eluent: PE/EtOAc = 10/1).

**<sup>1</sup>H NMR (600 MHz, CDCl<sub>3</sub>):** δ 8.03 (d, *J* = 7.9 Hz, 2H), 7.92 (d, *J* = 7.8 Hz, 2H), 7.66 – 7.62 (m, 1H), 7.58 – 7.54 (m, 1H), 7.51 – 7.47 (m, 2H), 7.45 – 7.41

(m, 2H), 7.31 – 7.26 (m, 2H), 7.22 – 7.15 (m, 3H), 5.97 (d, *J* = 10.4 Hz, 1H), 5.73 (dd, *J* = 10.3, 3.4 Hz, 1H), 3.63 (dd, *J* = 16.7, 9.0 Hz, 1H), 2.70 – 2.58 (m, 3H), 2.55 – 2.46 (m, 1H), 2.07 (s, 3H), 1.74 – 1.67 (m, 2H), 1.65 – 1.57 (m, 5H).

**<sup>13</sup>C NMR (151 MHz, CDCl<sub>3</sub>):** δ 190.4 (t, *J* = 28.7 Hz), 189.2 (t, *J* = 28.7 Hz), 142.2, 138.2, 134.8, 134.5, 134.3, 133.6, 132.7, 132.6, 130.4 (t, *J* = 3.0 Hz), 129.9 (t, *J* = 3.0 Hz), 128.9, 128.5, 128.4, 128.3, 125.9, 121.3 (t, *J* = 6.0 Hz), 119.6 (t, *J* = 255.2 Hz), 118.6 (t, *J* = 255.2 Hz), 49.7 (t, *J* = 21.1 Hz), 47.8 (t, *J* = 21.1 Hz), 36.6, 35.6, 30.7, 29.1, 23.1, 22.3.

**<sup>19</sup>F NMR (565 MHz, CDCl<sub>3</sub>)** δ -97.6 (d, *J* = 271.2 Hz, 1F), -100.9 (d, *J* = 271.2 Hz, 1F), -103.2 (d, *J* = 259.9 Hz, 1F), -103.8 (d, *J* = 259.9 Hz, 1F).



**IR (neat):** 3063, 2931, 2856, 1694, 1597, 1448, 1102, 1043, 908, 821.

**HRMS (ESI-TOF):** calculated for [C<sub>34</sub>H<sub>32</sub>F<sub>4</sub>O<sub>2</sub>SNa (M + Na<sup>+</sup>): 603.1951, found: 603.1986.

**2,2'-(2-(butylthio)-1,3,5-trimethylcyclohexa-2,5-diene-1,4-diyl)bis(2,2-difluoro-1-phenylethan-1-one) (4d):**

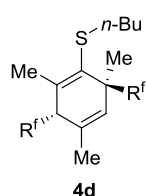

Following the general procedure B, the title compound was obtained as light yellow oil, 112 mg, 72% yield. (R<sub>f</sub> = 0.40, eluent: PE/EtOAc = 10/1).

**<sup>1</sup>H NMR (600 MHz, CDCl<sub>3</sub>):** δ 8.00 (d, *J* = 7.9 Hz, 2H), 7.85 (d, *J* = 7.9 Hz, 2H), 7.65 – 7.61 (m, 1H), 7.54 – 7.46 (m, 3H), 7.43 – 7.38 (m, 2H), 5.81 (s, 1H), 3.70 – 3.66 (m, 1H), 2.58 – 2.51 (m, 1H), 2.45 – 2.39 (m, 1H), 2.01 (s, 3H), 1.64 (s, 3H), 1.54 (s, 3H), 1.50 – 1.45 (m, 2H), 1.37 – 1.30 (m, 2H), 0.86 (t, *J* = 7.3 Hz, 3H).

**<sup>13</sup>C NMR (151 MHz, CDCl<sub>3</sub>):** δ 190.6 (t, *J* = 28.7 Hz), 189.9 (t, *J* = 28.7 Hz), 137.5, 135.4, 135.2, 134.5, 133.1, 132.9, 130.2, 129.8 (t, *J* = 3.0 Hz), 128.9, 128.3, 120.5 (t, *J* = 261.2 Hz), 117.9 (t, *J* = 261.2 Hz), 52.2 (t, *J* = 21.1 Hz), 50.9 (t, *J* = 21.1 Hz), 36.1, 31.7, 24.1, 23.5, 22.1, 21.3, 13.8.

**<sup>19</sup>F NMR (565 MHz, CDCl<sub>3</sub>)** δ -98.2 (d, *J* = 271.2 Hz, 1F), -98.5 (d, *J* = 271.2 Hz, 1F), -102.6 (d, *J* = 259.9 Hz, 1F), -104.5 (d, *J* = 259.9 Hz, 1F).

**IR (neat):** 3158, 2929, 2872, 1696, 1597, 1447, 1104, 1065, 1047, 910, 872.

**HRMS (ESI-TOF):** calculated for [C<sub>29</sub>H<sub>30</sub>F<sub>4</sub>O<sub>2</sub>SNa (M + Na<sup>+</sup>): 541.1795, found: 541.1819.

**2,2'-(4-(butylthio)-3,5-dimethyl-2,5-dihydro-[1,1'-biphenyl]-2,5-diyl)bis(2,2-difluoro-1-phenylethan-1-one) (4e):**

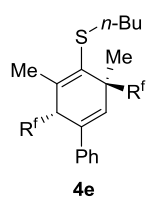

Following the general procedure B, the title compound was obtained as light yellow solid, m.p. 72 – 74 °C, 96 mg, 55% yield. (R<sub>f</sub> = 0.38, eluent: PE/EtOAc = 10/1).

**<sup>1</sup>H NMR (600 MHz, CDCl<sub>3</sub>):** δ 7.82 (d, *J* = 7.9 Hz, 2H), 7.65 (d, *J* = 7.9 Hz, 2H), 7.55 – 7.51 (m, 1H), 7.47 – 7.44 (m, 1H), 7.36 – 7.30 (m, 4H), 7.14 – 7.06 (m, 3H), 7.02 – 6.98 (m, 2H), 6.11 (s, 1H), 4.44 – 4.40 (m, 1H), 2.68 – 2.63 (m, 1H), 2.58 – 2.53 (m, 1H), 2.22 (s, 3H), 1.74 (s, 3H), 1.56 – 1.54 (m, 2H), 1.41 – 1.36 (m, 2H), 0.89 (t, *J* = 7.3 Hz, 3H).

**<sup>13</sup>C NMR (151 MHz, CDCl<sub>3</sub>):** δ 190.2 (t, *J* = 28.7 Hz), 189.0 (t, *J* = 28.7 Hz), 139.6, 137.8, 135.1, 134.9, 134.1, 134.3, 132.7 (m), 129.8 (t, *J* = 3.0 Hz), 128.5, 128.3, 128.2, 128.1, 127.7, 127.0, 120.1 (t, *J* = 259.7 Hz), 117.9 (t, *J* = 259.7 Hz), 51.8 (t, *J* = 21.1 Hz), 50.2 (t, *J* = 21.1 Hz), 36.3,

31.7, 24.3, 22.2, 21.5, 13.8

**<sup>19</sup>F NMR (565 MHz, CDCl<sub>3</sub>)** δ -96.7 (d, *J* = 259.9 Hz, 1F), -101.4 (d, *J* = 259.7 Hz, 1F), -101.9 (d, *J* = 265.6 Hz, 1F), -103.9 (d, *J* = 265.6 Hz, 1F).

**IR (neat):** 2959, 2920, 2849, 1698, 1684, 1597, 1449, 713, 692.

**HRMS (ESI-TOF):** calculated for [C<sub>34</sub>H<sub>32</sub>F<sub>4</sub>O<sub>2</sub>SNa (M + Na<sup>+</sup>)]: 603.1951, found: 603.1974.

**2,2'-(2-(butylthio)-5-(chloromethyl)-1,3-dimethylcyclohexa-2,5-diene-1,4-diyl)bis(2,2-difluoro-1-phenylethan-1-one) (4f):**

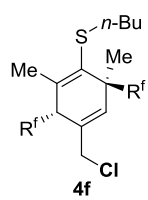

Following the general procedure B, the title compound was obtained as light yellow oil, 99.5 mg, 60% yield. (*R*<sub>f</sub> = 0.19, eluent: PE/EtOAc = 10/1).

**<sup>1</sup>H NMR (600 MHz, CDCl<sub>3</sub>):** δ 8.07 (d, *J* = 7.8 Hz, 2H), 7.90 (d, *J* = 7.7 Hz, 2H), 7.67 – 7.63 (m, 1H), 7.56 – 7.48 (m, 3H), 7.43 – 7.39 (m, 2H), 6.29 (s, 1H), 4.28 (d, *J* = 11.8 Hz, 1H), 4.25 – 4.19 (m, 1H), 4.07 (d, *J* = 12.0 Hz, 1H), 2.62 – 2.56 (m, 1H), 2.44 – 2.38 (m, 1H), 1.95 (s, 3H), 1.61 (s, 3H), 1.51 – 1.42 (m, 2H), 1.36 – 1.30 (m, 2H), 0.86 (t, *J* = 7.4 Hz, 3H).

**<sup>13</sup>C NMR (151 MHz, CDCl<sub>3</sub>):** δ 190.0 (t, *J* = 28.7 Hz), 189.1 (t, *J* = 28.7 Hz), 136.9, 135.1, 134.8, 134.7, 133.7, 132.5, 130.2 (t, *J* = 3.0 Hz), 129.9 (t, *J* = 3.0 Hz), 129.0, 128.8, 128.4, 119.2 (t, *J* = 261.2 Hz), 118.5 (t, *J* = 261.2 Hz), 51.3 (t, *J* = 21.1 Hz), 48.2, 48.1 (t, *J* = 21.1 Hz), 36.2, 31.6, 23.9, 22.1, 21.2, 13.7.

**<sup>19</sup>F NMR (565 MHz, CDCl<sub>3</sub>)** δ -96.5 (d, *J* = 271.2 Hz, 1F), -100.1 (d, *J* = 265.6 Hz, 1F), -101.6 (d, *J* = 271.2 Hz, 1F), -103.6 (d, *J* = 265.6 Hz, 1F).

**IR (neat):** 2958, 2929, 2872, 1697, 1597, 1448, 1264, 1152, 1065, 1064.

**HRMS (ESI-TOF):** calculated for [C<sub>29</sub>H<sub>29</sub>ClF<sub>4</sub>O<sub>2</sub>SNa (M + Na<sup>+</sup>)]: 575.1405, found: 575.1437.

**2,2'-(2-(butylthio)-5-(methoxymethyl)-1,3-dimethylcyclohexa-2,5-diene-1,4-diyl)bis(2,2-difluoro-1-phenylethan-1-one) (4g):**

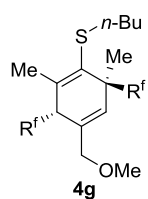

Following the general procedure B, the title compound was obtained as light yellow oil, 86 mg, 52% yield. (*R*<sub>f</sub> = 0.36, eluent: PE/EtOAc = 10/1).

**<sup>1</sup>H NMR (600 MHz, CDCl<sub>3</sub>):** δ 8.07 (d, *J* = 7.8 Hz, 2H), 7.91 (d, *J* = 7.7 Hz, 2H), 7.63 – 7.59 (m, 1H), 7.50 – 7.46 (m, 3H), 7.43 – 7.39 (m, 2H), 6.17 (s, 1H), 4.17 –

4.12 (m, 1H), 3.89 (d,  $J = 11.8$  Hz, 1H), 3.75 (d,  $J = 12.0$  Hz, 1H), 3.03 (s, 3H), 2.62 – 2.57 (m, 1H), 2.53 – 2.47 (m, 1H), 2.06 (s, 3H), 1.64 (s, 3H), 1.53 – 1.46 (m, 2H), 1.38 – 1.32 (m, 2H), 0.87 (t,  $J = 7.4$  Hz, 3H).

**$^{13}\text{C}$  NMR (151 MHz,  $\text{CDCl}_3$ ):**  $\delta$  190.2 (t,  $J = 28.7$  Hz), 188.9 (t,  $J = 28.7$  Hz), 138.0, 135.0, 134.7, 134.2, 132.2, 132.8, 132.7, 130.2 (t,  $J = 3.0$  Hz), 129.9 (t,  $J = 3.0$  Hz), 129.2, 128.8, 128.4, 119.3 (t,  $J = 261.2$  Hz), 118.7 (t,  $J = 261.2$  Hz), 75.2, 57.4, 51.3 (t,  $J = 21.1$  Hz), 48.2 (t,  $J = 21.1$  Hz), 36.3, 31.6, 24.3, 22.1, 21.7, 13.8.

**$^{19}\text{F}$  NMR (565 MHz,  $\text{CDCl}_3$ )**  $\delta$  -96.8 (d,  $J = 271.2$  Hz, 1F), -100.0 (d,  $J = 265.6$  Hz, 1F), -101.4 (d,  $J = 271.2$  Hz, 1F), -103.4 (d,  $J = 265.6$  Hz, 1F).

**IR (neat):** 2962, 2928, 2875, 1700, 1597, 1448, 1378, 1264, 1104, 1065, 1064.

**HRMS (ESI-TOF):** calculated for  $[\text{C}_{30}\text{H}_{32}\text{F}_4\text{O}_3\text{SNa} (\text{M} + \text{Na}^+)]$ : 571.1900, found: 571.1924.

**(4-(butylthio)-3,6-bis(1,1-difluoro-2-oxo-2-phenylethyl)-3,5-dimethylcyclohexa-1,4-dien-1-yl) methyl cinnamate (4h):**

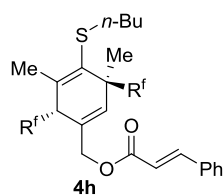

Following the general procedure B, the title compound was obtained as light yellow solid, m.p. 74 – 76 °C, 102 mg, 51% yield. ( $R_f = 0.25$ , eluent: PE/EtOAc = 10/1).

**$^1\text{H}$  NMR (600 MHz,  $\text{CDCl}_3$ ):**  $\delta$  8.08 (d,  $J = 7.8$  Hz, 2H), 7.90 (d,  $J = 7.8$  Hz, 2H), 7.65 – 7.57 (m, 2H), 7.53 – 7.49 (m, 1H), 7.49 – 7.35 (m, 9H), 6.31 (s, 1H), 6.19 (d,  $J = 16.0$  Hz, 1H), 4.76 (d,  $J = 13.1$  Hz, 1H), 4.58 (d,  $J = 13.1$  Hz, 1H), 4.21 – 4.15 (m, 1H), 2.63 – 2.55 (m, 1H), 2.52 – 2.43 (m, 1H), 2.05 (s, 3H), 1.64 (s, 3H), 1.53 – 1.47 (m, 2H), 1.39 – 1.31 (m, 2H), 0.87 (t,  $J = 7.4$  Hz, 3H).

**$^{13}\text{C}$  NMR (151 MHz,  $\text{CDCl}_3$ ):**  $\delta$  189.9 (t,  $J = 28.7$  Hz), 188.9 (t,  $J = 28.7$  Hz), 166.3, 145.2, 137.3, 134.9, 134.6, 134.3, 134.0, 133.3, 132.4, 130.5, 130.3 (t,  $J = 3.0$  Hz), 129.9 (t,  $J = 3.0$  Hz), 129.0, 128.9, 128.3, 128.2, 127.6, 120.2 (t,  $J = 261.2$  Hz), 118.5 (t,  $J = 261.2$  Hz), 117.6, 66.6, 51.1 (t,  $J = 21.1$  Hz), 48.5 (t,  $J = 21.1$  Hz), 36.2, 31.6, 24.1, 22.1, 21.5, 13.8.

**$^{19}\text{F}$  NMR (565 MHz,  $\text{CDCl}_3$ )**  $\delta$  -97.2 (d,  $J = 271.2$  Hz, 1F), -98.4 (d,  $J = 271.2$  Hz, 1F), -101.6 (d,  $J = 271.2$  Hz, 1F), -103.7 (d,  $J = 271.2$  Hz, 1F).

**IR (neat):** 2956, 2925, 2853, 1719, 1712, 1636, 1598, 1448, 1101, 1055.

**HRMS (ESI-TOF):** calculated for  $[\text{C}_{38}\text{H}_{36}\text{F}_4\text{O}_4\text{SNa} (\text{M} + \text{Na}^+)]$ : 687.2163, found: 687.2175.

methyl

**4-(butylthio)-3,6-bis(1,1-difluoro-2-oxo-2-phenylethyl)-3,5-dimethylcyclohexa-1,4-diene-1-carboxylate (4i):**

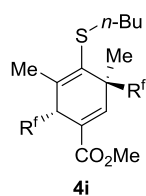

Following the general procedure B, the title compound was obtained as light yellow oil, 115 mg, 68% yield. (R<sub>f</sub> = 0.28, eluent: PE/EtOAc = 10/1).

**<sup>1</sup>H NMR (600 MHz, CDCl<sub>3</sub>):** δ 8.13 (d, *J* = 7.9 Hz, 2H), 7.91 (d, *J* = 7.9 Hz, 2H), 7.67 – 7.62 (m, 1H), 7.56 – 7.49 (m, 3H), 7.44 – 7.40 (m, 2H), 7.35 (s, 1H), 4.60 – 4.54 (m, 1H), 3.62 (s, 3H), 2.64 – 2.59 (m, 1H), 2.55 – 2.49 (m, 1H), 2.08 (s, 3H), 1.69 (s, 3H), 1.52 – 1.43 (m, 2H), 1.37 – 1.30 (m, 2H), 0.86 (t, *J* = 7.4 Hz, 3H).

**<sup>13</sup>C NMR (151 MHz, CDCl<sub>3</sub>):** δ 189.9 (t, *J* = 28.7 Hz), 188.8 (t, *J* = 28.7 Hz), 166.3, 143.9, 137.7, 134.5, 134.3, 133.6, 133.5, 132.5, 130.3 (t, *J* = 3.0 Hz), 129.9 (t, *J* = 3.0 Hz), 128.9, 128.4, 124.4, 120.2 (t, *J* = 261.2 Hz), 118.8 (t, *J* = 261.2 Hz), 52.2, 52.1 (t, *J* = 21.1 Hz), 47.6 (t, *J* = 21.1 Hz), 36.3, 31.6, 23.7, 22.1, 20.9, 13.8.

**<sup>19</sup>F NMR (565 MHz, CDCl<sub>3</sub>)** δ -98.6 (d, *J* = 265.6 Hz, 1F), -101.1 (d, *J* = 271.2 Hz, 1F), -101.6 (d, *J* = 265.6 Hz, 1F), -102.7 (d, *J* = 271.2 Hz, 1F).

**IR (neat):** 2955, 2872, 1701, 1597, 1448, 1112, 1045, 907, 822, 711.

**HRMS (ESI-TOF):** calculated for [C<sub>30</sub>H<sub>30</sub>F<sub>4</sub>O<sub>4</sub>SNa (M + Na<sup>+</sup>)]: 585.1693, found: 585.1719.

**4-(butylthio)-3,6-bis(1,1-difluoro-2-oxo-2-phenylethyl)-3,5-dimethylcyclohexa-1,4-diene-1-carbonitrile (4j):**

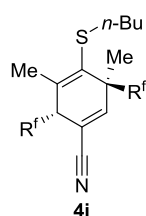

Following the general procedure B, the title compound was obtained as light yellow oil, 103 mg, 65% yield. (R<sub>f</sub> = 0.26, eluent: PE/EtOAc = 10/1).

**<sup>1</sup>H NMR (600 MHz, CDCl<sub>3</sub>):** δ 8.10 (d, *J* = 7.8 Hz, 2H), 7.93 (d, *J* = 7.8 Hz, 2H), 7.69 – 7.65 (m, 1H), 7.61 – 7.58 (m, 1H), 7.55 – 7.51 (m, 2H), 7.48 – 7.44 (m, 2H), 7.06 (s, 1H), 4.25 – 4.12 (m, 1H), 2.59 – 2.54 (m, 1H), 2.50 – 2.43 (m, 1H), 2.04 (s, 3H), 1.62 (s, 3H), 1.49 – 1.43 (m, 2H), 1.34 – 1.29 (m, 2H), 0.85 (t, *J* = 7.3 Hz, 3H).

**<sup>13</sup>C NMR (151 MHz, CDCl<sub>3</sub>):** δ 189.1 (t, *J* = 28.7 Hz), 188.1 (t, *J* = 28.7 Hz), 150.4, 135.9, 135.0, 134.0, 133.9, 133.7, 132.1, 130.2 (t, *J* = 3.0 Hz), 130.0 (t, *J* = 3.0 Hz), 129.1, 128.7, 119.2 (t, *J* = 261.2 Hz), 118.2 (t, *J* = 261.2 Hz), 117.5, 106.8, 51.7 (t, *J* = 21.1 Hz), 48.6 (t, *J* = 21.1 Hz), 36.3,

31.5, 23.5, 22.0, 21.2, 13.7.

<sup>19</sup>F NMR (565 MHz, CDCl<sub>3</sub>) δ -96.3 (d, *J* = 276.9 Hz, 1F), -99.8 (d, *J* = 276.9 Hz, 1F), -100.7 (d, *J* = 276.9 Hz, 1F), -102.1 (d, *J* = 276.9 Hz, 1F).

IR (neat): 2958, 2926, 2872, 2224, 1697, 1596, 1448, 1153, 1114, 1068, 1046.

HRMS (ESI-TOF): calculated for [C<sub>29</sub>H<sub>27</sub>F<sub>4</sub>NO<sub>2</sub>SNa (M + Na<sup>+</sup>)]: 552.1591, found: 552.1614.

**2,2'-(5-bromo-2-(butylthio)-1,3-dimethylcyclohexa-2,5-diene-1,4-diyl)bis(2,2-difluoro-1-phenylethanol) (4l):**

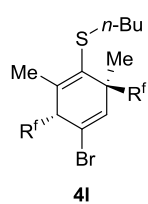

Following the general procedure B, the title compound was obtained as light yellow oil, 119 mg, 68% yield. (R<sub>f</sub> = 0.49, eluent: PE/EtOAc = 10/1).

<sup>1</sup>H NMR (600 MHz, CDCl<sub>3</sub>): δ 8.07 (d, *J* = 7.8 Hz, 2H), 7.90 (d, *J* = 7.7 Hz, 2H), 7.68 – 7.62 (m, 1H), 7.59 – 7.54 (m, 1H), 7.53 – 7.48 (m, 2H), 7.47 – 7.41 (m, 2H),

6.53 (s, 1H), 4.25 – 4.19 (m, 1H), 2.65 – 2.59 (m, 1H), 2.56 – 2.43 (m, 1H), 2.12 (s, 3H), 1.63 (s, 3H), 1.55 – 1.45 (m, 2H), 1.38 – 1.31 (m, 2H), 0.87 (t, *J* = 7.4 Hz, 3H).

<sup>13</sup>C NMR (151 MHz, CDCl<sub>3</sub>): δ 189.8 (t, *J* = 28.7 Hz), 189.1 (t, *J* = 28.7 Hz), 137.6, 136.5 (t, *J* = 7.6 Hz), 134.7, 134.6, 134.5, 133.6, 132.9, 130.2 (t, *J* = 3.0 Hz), 129.9 (t, *J* = 3.0 Hz), 128.9, 128.5, 118.6 (t, *J* = 261.2 Hz), 116.9 (t, *J* = 261.2 Hz), 114.4, 55.1 (t, *J* = 21.1 Hz), 54.1 (t, *J* = 21.1 Hz), 36.3, 31.5, 24.1, 22.1, 21.1, 13.8.

<sup>19</sup>F NMR (565 MHz, CDCl<sub>3</sub>) δ -97.3 (d, *J* = 265.6 Hz, 1F), -101.5 (d, *J* = 271.2 Hz, 1F), -102.3 (d, *J* = 265.6 Hz, 1F), -103.2 (d, *J* = 271.2 Hz, 1F).

IR (neat): 2958, 2929, 1697, 1577, 1448, 1111, 1044, 907, 873, 713.

HRMS (ESI-TOF): calculated for [C<sub>28</sub>H<sub>27</sub>F<sub>4</sub>NaO<sub>2</sub>SNa (M + Na<sup>+</sup>)]: 605.0743, found: 605.0779.

**2,2'-(2-(butylthio)-1,3-diethylcyclohexa-2,5-diene-1,4-diyl)bis(2,2-difluoro-1-phenylethanol) (4m):**

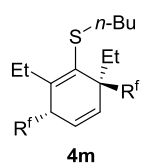

Following the general procedure B, the title compound was obtained as light yellow oil, 104 mg, 65% yield. (R<sub>f</sub> = 0.55, eluent: PE/EtOAc = 10/1).

<sup>1</sup>H NMR (600 MHz, CDCl<sub>3</sub>): δ 8.08 (d, *J* = 7.8 Hz, 0.87H), 8.05 – 8.00 (m, 4.8 Hz, 2H), 7.97 (d, *J* = 7.8 Hz, 1H), 7.66 – 7.60 (m, 1H), 7.58 – 7.45 (m, 3H), 7.44 – 7.34

(m, 2H), 5.87 – 5.80 (m, 1H), 5.74 (dd, *J* = 10.5, 3.4 Hz, 0.6H), 5.61 (d, *J* = 10.2 Hz, 0.38H), 4.15

– 4.06 (m, 0.39H), 3.94 – 3.86 (m, 0.6H), 3.34 – 3.18 (m, 1H), 2.71 – 2.65 (m, 1.42H), 2.58 – 2.38 (m, 1.68H), 2.33 – 2.20 (m, 1H), 1.95 – 1.88 (m, 0.62H), 1.77 – 1.71 (m, 0.43H), 1.58 – 1.32 (m, 4H), 1.10 (t,  $J = 7.4$  Hz, 1.2H), 0.95 – 0.84 (m, 5H), 0.77 (t,  $J = 7.5$  Hz, 1.92H), 0.60 (t,  $J = 7.5$  Hz, 1.2H).

**$^{13}\text{C}$  NMR (151 MHz,  $\text{CDCl}_3$ ):**  $\delta$  191.1 (t,  $J = 28.7$  Hz), 190.2 (t,  $J = 28.7$  Hz), 190.1 (t,  $J = 28.7$  Hz), 189.5 (t,  $J = 28.7$  Hz), 145.4, 145.1, 134.8, 134.7, 134.5, 134.4, 133.7, 133.6, 132.8, 132.3, 131.8, 130.8, 130.6, 130.4, 130.3, 128.9, 128.8, 128.4, 124.8, 123.2, 120.5 – 117.0 (m), 55.2, (t,  $J = 21.1$  Hz), 54.3 (t,  $J = 21.1$  Hz), 43.3 (t,  $J = 21.1$  Hz), 42.9 (t,  $J = 21.1$  Hz), 37.8, 36.7, 31.8, 31.3, 28.5, 28.1, 26.0, 25.5, 22.3, 22.2, 13.9, 13.8, 12.9, 12.5, 9.0, 8.4.

**$^{19}\text{F}$  NMR (565 MHz,  $\text{CDCl}_3$ )**  $\delta$  -96.7 – -103.8 (m, 4F)

**IR (neat):** 3057, 2958, 2930, 2872, 1694, 1597, 1448, 1101, 1043, 912, 821.

**HRMS (ESI-TOF):** calculated for  $[\text{C}_{30}\text{H}_{32}\text{F}_4\text{O}_2\text{SNa} (\text{M} + \text{Na}^+)]$ : 555.1951, found: 555.1961.

**2,2'-(2-(butylthio)-3-ethyl-1-methylcyclohexa-2,5-diene-1,4-diyl)bis(2,2-difluoro-1-phenylethanol-1-one) (4n):**

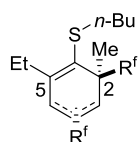

**4n**(C2/C5 85/15)

Following the general procedure B, the title compound was obtained as a mixture of C2/C5 85/15, light yellow oil, 95 mg, 61% yield. ( $R_f = 0.53$ , eluent: PE/EtOAc = 10/1).

**$^1\text{H}$  NMR (600 MHz,  $\text{CDCl}_3$ ):**  $\delta$  8.07 (d,  $J = 7.9$  Hz, 0.37H), 8.01 (d,  $J = 7.9$  Hz, 1.84H), 7.96 (d,  $J = 7.9$  Hz, 1.62H), 7.91 (d,  $J = 7.9$  Hz, 0.19H), 7.64 – 7.62 (m, 1H), 7.56 – 7.54 (m, 1H), 7.49 – 7.47 (m, 2H), 7.44 – 7.42 (m, 2H), 6.02(d,  $J = 10.3$  Hz, 0.85H), 5.85 (dd,  $J = 10.3$ , 4.0 Hz, 0.15H), 5.71 (dd,  $J = 10.3$ , 3.9 Hz, 0.85H), 5.66 (d,  $J = 10.3$  Hz, 0.13H), 3.97 – 3.92 (m, 1H), 3.25 – 3.18 (m, 1H), 2.65 – 2.50 (m, 2H), 2.25 – 2.18 (m, 1H), 1.97 (s, 0.36H), 1.57 (s, 2.64H), 1.54 – 1.47 (m, 2H), 1.41 – 1.33 (m, 2H), 0.94 (t,  $J = 7.3$  Hz, 2.59H), 0.88 (t,  $J = 7.3$  Hz, 3H), 0.61 (t,  $J = 7.3$  Hz, 0.40H).

**$^{13}\text{C}$  NMR (151 MHz,  $\text{CDCl}_3$ ):**  $\delta$  190.0 (t,  $J = 28.7$  Hz), 189.2 (t,  $J = 28.7$  Hz), 144.1, 134.8, 134.6, 134.4, 133.5, 133.4, 133.3, 133.2, 132.7, 131.6, 130.6, 130.3, 130.19, 130.17, 129.9, 128.9, 128.8, 128.34, 128.30, 120.9, 120.8, 119.6 (t,  $J = 255.2$  Hz), 118.6 (t,  $J = 255.2$  Hz), 50.6 (t,  $J = 21.1$  Hz), 43.6 (t,  $J = 21.1$  Hz), 37.8, 35.3, 31.8, 31.5, 31.1, 28.1, 23.7, 22.2, 21.8, 13.8, 12.6.

**$^{19}\text{F}$  NMR (565 MHz,  $\text{CDCl}_3$ )**  $\delta$  -97.7 (d,  $J = 273.5$  Hz, 1F, C5), -102.1 (d,  $J = 273.5$  Hz, 1F, C5),

-102.2 (d,  $J = 273.5$  Hz, 1F, C5), -103.2 (d,  $J = 273.5$  Hz, 1F, C5).

**IR (neat):** 2959, 2931, 2873, 1693, 1597, 1448, 1102, 1042, 731, 686.

**HRMS (ESI-TOF):** calculated for  $[C_{29}H_{30}F_4O_2SNa (M + Na^+)]$ : 541.1795, found: 541.1818.

**2,2'-(6-(butylthio)-5-methyl-2,5-dihydro-[1,1'-biphenyl]-2,5-diyl)bis(2,2-difluoro-1-phenylethanol-1-one) (4o):**

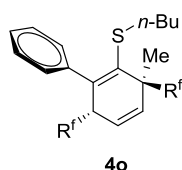

Following the general procedure B, the title compound was obtained as light yellow oil, 73 mg, 43% yield. ( $R_f = 0.51$ , eluent: PE/EtOAc = 10/1).

**$^1H$  NMR (600 MHz,  $CDCl_3$ ):**  $\delta$  8.02 (d,  $J = 7.8$  Hz, 2H), 7.72 (d,  $J = 7.7$  Hz, 2H), 7.68 – 7.62 (m, 2H), 7.57 – 7.52 (m, 2H), 7.38 – 7.34 (m, 2H), 7.16 – 7.08 (m, 5H), 6.27 (d,  $J = 10.3$  Hz, 1H), 6.02 (dd,  $J = 10.3, 3.5$  Hz, 1H), 4.59 – 4.43 (m, 1H), 2.02 – 1.92 (m, 2H), 1.67 (s, 3H), 0.92 – 0.81 (m, 4H), 0.58 (t,  $J = 7.1$  Hz, 3H).

**$^{13}C$  NMR (151 MHz,  $CDCl_3$ ):**  $\delta$  189.4 (t,  $J = 28.7$  Hz), 188.5 (t,  $J = 28.7$  Hz), 140.4, 140.2, 136.0, 134.7, 134.0, 133.4, 132.5, 130.2 (t,  $J = 3.0$  Hz), 129.9 (t,  $J = 3.0$  Hz), 129.6, 128.4, 128.1, 127.4, 120.6, 120.5, 119.2 (t,  $J = 261.2$  Hz), 118.2 (t,  $J = 261.2$  Hz), 51.4 (t,  $J = 21.1$  Hz), 48.2 (t,  $J = 21.1$  Hz), 36.2, 30.6, 23.4, 21.9, 13.5.

**$^{19}F$  NMR (565 MHz,  $CDCl_3$ )**  $\delta$  -98.3 (d,  $J = 271.2$  Hz, 1F), -98.8 (d,  $J = 282.5$  Hz, 1F), -101.7 (d,  $J = 282.5$  Hz, 1F), -102.8 (d,  $J = 271.2$  Hz, 1F).

**IR (neat):**

**HRMS (ESI-TOF):** calculated for  $[C_{33}H_{30}F_4O_2SNa (M + Na^+)]$ : 589.1795, found: 589.1810.

**2,2'-(2-(butylthio)-3-(methoxymethyl)-1-methylcyclohexa-2,5-diene-1,4-diyl)bis(2,2-difluoro-1-phenylethanol-1-one) (4p):**

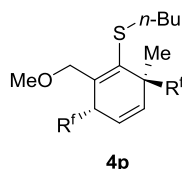

Following the general procedure B, the title compound was obtained as light yellow oil, 91 mg, 57% yield. ( $R_f = 0.43$ , eluent: PE/EtOAc = 10/1).

**$^1H$  NMR (600 MHz,  $CDCl_3$ ):**  $\delta$  8.06 (d,  $J = 7.8$  Hz, 2H), 7.93 (d,  $J = 7.7$  Hz, 2H), 7.64 – 7.60 (m, 1H), 7.57 – 7.54 (m, 1H), 7.51 – 7.47 (m, 2H), 7.43 – 7.39 (m, 2H), 6.02 (d,  $J = 10.4$  Hz, 1H), 5.83 (dd,  $J = 10.4, 3.8$  Hz, 1H), 4.52 (d,  $J = 12.1$  Hz, 1H), 4.24 – 4.14 (m, 2H), 2.99 (s, 3H), 2.65 – 2.55 (m, 1H), 2.54 – 2.46 (m, 1H), 1.65 (s, 3H), 1.58 – 1.49 (m, 2H), 1.37 – 1.35 (m, 2H), 0.89 (t,  $J = 7.4$  Hz, 3H).

**<sup>13</sup>C NMR (151 MHz, CDCl<sub>3</sub>):** δ 190.2 (t, *J* = 28.7 Hz), 188.2 (t, *J* = 28.7 Hz), 138.4, 137.7, 134.6, 134.2, 133.7, 132.7, 132.2, 130.2 (t, *J* = 3.0 Hz), 130.1 (t, *J* = 3.0 Hz), 128.7, 128.4, 121.0, 119.2 (t, *J* = 261.2 Hz), 118.2 (t, *J* = 261.2 Hz), 72.5, 57.4, 50.0 (t, *J* = 21.1 Hz), 42.8 (t, *J* = 21.1 Hz), 38.1, 31.7, 29.9, 22.3, 22.1, 13.8.

**<sup>19</sup>F NMR (565 MHz, CDCl<sub>3</sub>)** δ -100.2 (d, *J* = 271.2 Hz, 1F), -102.1 (d, *J* = 282.5 Hz, 1F), -102.2 (d, *J* = 282.5 Hz, 1F), -103.5 (d, *J* = 271.2 Hz, 1F).

**IR (neat):** 3057, 2962, 2928, 1697, 1597, 1448, 1101, 1072, 1043, 911, 829.

**HRMS (ESI-TOF):** calculated for [C<sub>29</sub>H<sub>30</sub>F<sub>4</sub>O<sub>3</sub>SNa (M + Na<sup>+</sup>): 557.1744, found: 557.1767.

**(2-(butylthio)-3,6-bis(1,1-difluoro-2-oxo-2-phenylethyl)-3-methylcyclohexa-1,4-dien-1-yl)methyl 4-chlorobutanoate (4q):**

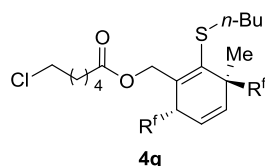

Following the general procedure B, the title compound was obtained as light yellow oil, 97 mg, 52% yield. (*R<sub>f</sub>* = 0.27, eluent: PE/EtOAc = 10/1).

**<sup>1</sup>H NMR (600 MHz, CDCl<sub>3</sub>):** δ 8.03 (d, *J* = 7.8 Hz, 2H), 7.93 (d, *J* = 7.7 Hz, 2H), 7.66 – 7.62 (m, 1H), 7.58 – 7.54 (m, 1H), 7.51 – 7.48 (m, 2H), 7.45 – 7.40 (m, 2H), 5.99 (d, *J* = 10.3 Hz, 1H), 5.72 (dd, *J* = 10.3, 3.9 Hz, 1H), 5.38 (d, *J* = 12.9 Hz, 1H), 4.88 (d, *J* = 13.0 Hz, 1H), 4.18 – 4.05 (m, 1H), 3.57 (t, *J* = 6.3 Hz, 2H), 2.67 – 2.62 (m, 1H), 2.53 – 2.48 (m, 1H), 2.42 – 2.36 (m, 2H), 2.08 – 2.02 (m, 2H), 1.63 (s, 3H), 1.57 – 1.51 (m, 2H), 1.41 – 1.35 (m, 2H), 0.90 (t, *J* = 7.4 Hz, 3H).

**<sup>13</sup>C NMR (151 MHz, CDCl<sub>3</sub>):** δ 190.2 (t, *J* = 28.7 Hz), 188.7 (t, *J* = 28.7 Hz), 171.9, 140.2, 135.7, 134.7, 134.6, 133.8, 130.2 (t, *J* = 3.0 Hz), 130.1 (t, *J* = 3.0 Hz), 129.0, 128.5, 120.7, 119.2 (t, *J* = 261.2 Hz), 118.3 (t, *J* = 261.2 Hz), 95.4, 50.1 (t, *J* = 21.1 Hz), 44.1, 43.1 (t, *J* = 21.1 Hz), 38.2, 31.7, 31.2, 29.8, 27.7, 22.2, 22.1, 13.8.

**<sup>19</sup>F NMR (565 MHz, CDCl<sub>3</sub>)** δ -98.4 (d, *J* = 271.2 Hz, 1F), -102.3 (d, *J* = 282.5 Hz, 1F), -102.6 (d, *J* = 282.5 Hz, 1F), -103.5 (d, *J* = 271.2 Hz, 1F).

**IR (neat):** 2958, 2919, 2849, 1736, 1696, 1597, 1448, 1107, 1043, 912, 821.

**HRMS (ESI-TOF):** calculated for [C<sub>32</sub>H<sub>33</sub>ClF<sub>4</sub>O<sub>4</sub>SNa (M + Na<sup>+</sup>): 647.1616, found: 647.1646.



**(2-(butylthio)-3,6-bis(1,1-difluoro-2-oxo-2-phenylethyl)-3-methylcyclohexa-1,4-dien-1-yl)methyl ethyl fumarate (4r):**

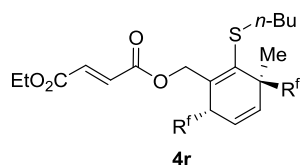

Following the general procedure B, the title compound was obtained as light yellow solid, m.p. 88 – 89 °C, 128 mg, 66% yield. (*R<sub>f</sub>* = 0.25, eluent: PE/EtOAc = 10/1).

**<sup>1</sup>H NMR (600 MHz, CDCl<sub>3</sub>):** δ 8.01 (d, *J* = 7.9 Hz, 2H), 7.92 (d, *J* = 7.8 Hz, 2H), 7.65 – 7.60 (m, 1H), 7.56 – 7.52 (m, 1H), 7.49 – 7.45 (m, 2H), 7.43 – 7.39 (m, 2H), 6.78 (d, *J* = 15.8 Hz, 1H), 6.72 (d, *J* = 15.8 Hz, 1H), 5.99 (d, *J* = 10.2 Hz, 1H), 5.72 (dd, *J* = 10.4, 3.8 Hz, 1H), 5.47 (d, *J* = 13.0 Hz, 1H), 4.98 (d, *J* = 13.0 Hz, 1H), 4.28 (q, *J* = 7.2 Hz, 2H), 4.13 – 4.06 (m, 1H), 2.68 – 2.62 (m, 1H), 2.54 – 2.49 (m, 1H), 1.63 (s, 3H), 1.57 – 1.51 (m, 2H), 1.40 – 1.31 (m, 5H), 0.89 (t, *J* = 7.3 Hz, 3H).

**<sup>13</sup>C NMR (151 MHz, CDCl<sub>3</sub>):** δ 189.9 (t, *J* = 28.7 Hz), 188.5 (t, *J* = 28.7 Hz), 164.8, 164.1, 140.9, 135.0, 134.8, 134.4, 134.1, 133.8, 132.9, 132.5, 132.3, 130.07 (t, *J* = 3.0 Hz), 130.05 (t, *J* = 3.0 Hz), 129.0, 128.4, 120.5, 119.9 (t, *J* = 261.2 Hz), 118.2 (t, *J* = 261.2 Hz), 66.1, 61.6, 50.0 (t, *J* = 21.1 Hz), 43.1 (t, *J* = 21.1 Hz), 38.3, 31.7, 22.2, 22.1, 14.2, 13.8.

**<sup>19</sup>F NMR (565 MHz, CDCl<sub>3</sub>):** δ -98.8 (d, *J* = 271.2 Hz, 1F), -102.5 (d, *J* = 271.2 Hz, 1F), -102.6 (d, *J* = 271.2 Hz, 1F), -103.6 (d, *J* = 271.2 Hz, 1F).

**IR (neat):** 2958, 2930, 2870, 1719, 1701, 1645, 1596, 1447, 1291, 1255, 1148, 1035, 976, 913, 714, 686.

**HRMS (ESI-TOF):** calculated for [C<sub>34</sub>H<sub>34</sub>F<sub>4</sub>O<sub>6</sub>SNa (M + Na<sup>+</sup>): 669.1904, found: 669.1900.

**(2-(butylthio)-3,6-bis(1,1-difluoro-2-oxo-2-phenylethyl)-3-methylcyclohexa-1,4-dien-1-yl)methyl 5-chlorothiophene-2-carboxylate (4s):**

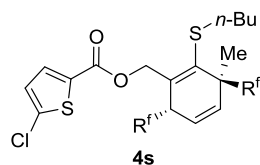

Following the general procedure B, the title compound was obtained as light yellow solid, m.p. 69 – 71 °C, 119.5 mg, 60% yield., (*R<sub>f</sub>* = 0.36, eluent: PE/EtOAc = 10/1). The crystal of **4s** was obtained by crystallization from DCM and hexane at room temperature. **<sup>1</sup>H NMR**

**(600 MHz, CDCl<sub>3</sub>):** δ 8.00 (d, *J* = 7.8 Hz, 2H), 7.91 (d, *J* = 7.7 Hz, 2H), 7.62 – 7.58 (m, 1H), 7.54 – 7.49 (m, 2H), 7.44 – 7.35 (m, 4H), 6.92 (d, *J* = 4.0 Hz, 1H), 6.01 (d, *J* = 10.3 Hz, 1H), 5.72 (dd,

$J = 10.3, 3.9$  Hz, 1H), 5.52 (d,  $J = 12.8$  Hz, 1H), 5.07 (d,  $J = 12.8$  Hz, 1H), 4.18 – 4.12 (m, 1H), 2.70 – 2.64 (m, 1H), 2.58 – 2.51 (m, 1H), 1.65 (s, 3H), 1.59 – 1.52 (m, 2H), 1.40 – 1.33 (m, 2H), 0.89 (t,  $J = 7.4$  Hz, 3H).

**$^{13}\text{C}$  NMR (151 MHz,  $\text{CDCl}_3$ ):**  $\delta$  190.0 (t,  $J = 28.7$  Hz), 188.5 (t,  $J = 28.7$  Hz), 160.3, 141.0, 137.8, 135.4, 134.7, 134.6, 133.7, 133.3, 132.6, 132.3, 130.2 (t,  $J = 3.0$  Hz), 130.0 (t,  $J = 3.0$  Hz), 128.9, 128.5, 127.4, 120.5, 119.2 (t,  $J = 261.2$  Hz), 118.2 (t,  $J = 261.2$  Hz), 66.2, 50.1 (t,  $J = 21.1$  Hz), 43.2 (t,  $J = 21.1$  Hz), 38.3, 31.8, 22.2, 22.1, 13.8.

**$^{19}\text{F}$  NMR (565 MHz,  $\text{CDCl}_3$ )**  $\delta$  -98.7 (d,  $J = 271.2$  Hz, 1F), -102.8 (d,  $J = 271.2$  Hz, 1F), -102.9 (d,  $J = 271.2$  Hz, 1F), -103.7 (d,  $J = 271.2$  Hz, 1F).

**IR (neat):** 2929, 2854, 1714, 1702, 1687, 1423, 1270, 1688, 1061, 912, 826.

**HRMS (ESI-TOF):** calculated for  $[\text{C}_{33}\text{H}_{29}\text{ClF}_4\text{O}_4\text{S}_2\text{Na} (\text{M} + \text{Na}^+)]$ : 687.1024, found: 687.1042.

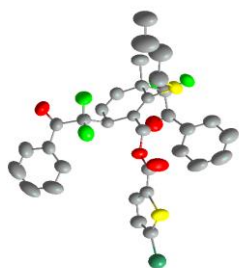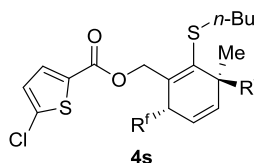

|                        |                                                                                 |                                                                                 |
|------------------------|---------------------------------------------------------------------------------|---------------------------------------------------------------------------------|
| Bond precision         | c-c=0.0048 Å                                                                    | Wavelength=0.71073                                                              |
| Cell                   | a=10.2039 (5)                                                                   | b=13.2445 (5) c=13.5012 (6)                                                     |
|                        | $\alpha$ =66.799(1)                                                             | $\beta$ =70.330(1) $\gamma$ =75.627(1)                                          |
| Temperature            | 294 K                                                                           |                                                                                 |
|                        | Calculated                                                                      | Reported                                                                        |
| Volumn                 | 1569.19(12)                                                                     | 1569.19(12)                                                                     |
| Space group            | P -1                                                                            | P -1                                                                            |
| Hall group             | -P 1                                                                            | -P 1                                                                            |
| Moiety formula         | C <sub>33</sub> H <sub>29</sub> Cl F <sub>4</sub> O <sub>4</sub> S <sub>2</sub> | C <sub>33</sub> H <sub>29</sub> Cl F <sub>4</sub> O <sub>4</sub> S <sub>2</sub> |
| Sum formula            | C <sub>33</sub> H <sub>29</sub> Cl F <sub>4</sub> O <sub>4</sub> S <sub>2</sub> | C <sub>33</sub> H <sub>29</sub> Cl F <sub>4</sub> O <sub>4</sub> S <sub>2</sub> |
| Mr                     | 665.13                                                                          | 665.13                                                                          |
| Dx, g cm <sup>-3</sup> | 1.408                                                                           | 1.408                                                                           |
| Z                      | 2                                                                               | 2                                                                               |
| Mu (mm <sup>-1</sup> ) | 0.316                                                                           | 0.316                                                                           |
| F000                   | 688.0                                                                           | 688.0                                                                           |
| F000'                  | 689.17                                                                          |                                                                                 |

|           |             |             |
|-----------|-------------|-------------|
| h,k,lmax  | 13,17,17    | 13,17,17    |
| Nref      | 7180        | 7140        |
| Tmin,Tmax | 0.903,0.954 | 0.903,0.954 |
| Tmin'     | 0.887       |             |

Correction method= # Reported T Limits: Tmin=0.903 Tmax=0.954

AbsCorr = EMPIRICAL

Data completeness= 0.994 Theta(max)= 27.460

R(reflections)= 0.0537(5151) wR2(reflections)= 0.1818( 7140)

S = 1.021 Npar= 397

Crystallographic data (excluding structural factors) for compound **4s** also has been deposited at the Cambridge Crystallographic Data Centre under the deposition number CCDC 1973271.

### 2,2'-2-meth

### 2,2'-(2-(butylthio)-3-chloro-1-methylcyclohexa-2,5-diene-1,4-diyl)bis(2,2-difluoro-1-phenylethan-1-one) (**4t**)

### and 2,2'-(2-(butylthio)-3-methyl-1,4-phenylene)bis(2,2-difluoro-1-phenylethan-1-one) (**4t'**):

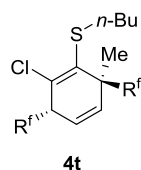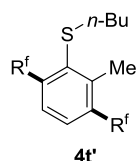

Following the general procedure B, the title compound was obtained as the mixture of **4q** and **4q'** with the ratio of 1.3/1, light yellow oil, 110 mg, 72% yield. ( $R_f = 0.46$ , eluent: PE/EtOAc = 10/1).

**<sup>1</sup>H NMR (600 MHz, CDCl<sub>3</sub>):**  $\delta$  8.10 (d,  $J = 7.7$  Hz, 4H, **4t'**), 8.04 (d,  $J = 7.8$  Hz, 2H, **4t**), 7.96 (d,  $J = 7.8$  Hz, 2H, **4t**), 7.83 (s, 2H, **4t'**), 7.67 – 7.56 (m, 4H, **4t&4t'**), 7.52 – 7.43 (m, 8H, **4t&4t'**), 6.07 (d,  $J = 10.4$  Hz, 1H, **4t**), 5.89 (dd,  $J = 10.3, 3.5$  Hz, 1H, **4t**), 4.28 – 4.14 (m, 1H, **4t**), 2.77 – 2.68 (m, 2H, **4t**), 2.50 (s, 3H, **4t'**), 2.44 (t,  $J = 7.4$  Hz, 2H, **4t'**), 1.67 (s, 3H, **4t**), 1.53 – 1.47 (m, 2H, **4t**), 1.37 – 1.29 (m, 4H, **4t'**), 1.24 – 1.18 (m, 2H, **4t'**), 0.86 (t,  $J = 7.4$  Hz, 3H, **4t**), 0.78 (t,  $J = 7.3$  Hz, 3H, **4t'**).

**<sup>13</sup>C NMR (151 MHz, CDCl<sub>3</sub>):**  $\delta$  189.6 – 188.4 (m), 143.1, 136.7, 135.7, 135.5, 134.6, 134.4, 134.1, 133.9, 133.8, 133.6, 132.8, 132.2, 132.1, 130.4, 130.2, 130.0, 128.9, 128.8, 128.6, 126.9, 124.3, 120.9, 118.9 – 116.5 (m), 51.7 (t,  $J = 21.1$  Hz, **4t**), 49.2 (t,  $J = 21.1$  Hz, **4t**), 36.3 (**4t'**), 35.8 (**4t**), 31.5 (**4t**), 30.7 (**4t'**), 22.14 (**4t**), 22.10 (**4t**), 22.0 (**4t'**), 17.9 (**4t'**), 13.74 (**4t**), 13.67 (**4t'**).

**<sup>19</sup>F NMR (565 MHz, CDCl<sub>3</sub>)**  $\delta$  -93.3 (s, 2F, **4t'**), -95.6 (s, 2F, **4t'**), -98.2 (d,  $J = 271.2$  Hz, 1F, **4t**),

-101.1 (d,  $J = 282.5$  Hz, 1F, **4t**), -103.2 (d,  $J = 282.5$  Hz, 1F, **4t**), -104.7 (d,  $J = 271.2$  Hz, 1F, **4t**).

**IR (neat):** 2958, 2929, 2872, 1701, 1597, 1448, 1254, 1125, 1057, 908, 870, 816.

**HRMS (ESI-TOF):** calculated for **4t** [ $C_{27}H_{25}ClF_4O_2SNa$  ( $M + Na^+$ )]: 547.1092, found: 547.1122;

**4t'** [ $C_{27}H_{24}F_4O_2SNa$  ( $M + Na^+$ )]: 511.1325, found: 511.1353.

**1,1'-(2-methyl-3-(methylthio)-2,5-dihydrofuran-2,5-diyl)bis(2,2-difluoro-2-phenylethan-1-ol) (4u):**

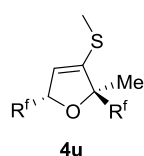

Following the general procedure B, the title compound was obtained as light yellow oil, 78 mg, 61% yield. ( $R_f = 0.35$ , eluent: PE/EtOAc = 10/1).

**$^1H$  NMR (600 MHz,  $CDCl_3$ ):**  $\delta$  8.10 (d,  $J = 7.9$  Hz, 2H), 8.04 (d,  $J = 7.8$  Hz, 2H), 7.68 – 7.64 (m, 1H), 7.63 – 7.59 (m, 1H), 7.52 – 7.48 (m, 2H), 7.47 – 7.43 (m, 2H), 5.38 (s, 1H), 5.09 – 5.03 (m, 1H), 2.40 (s, 3H), 1.61 (s, 3H).

**$^{13}C$  NMR (151 MHz,  $CDCl_3$ ):**  $\delta$  189.7 (t,  $J = 28.7$  Hz), 189.0 (t,  $J = 28.7$  Hz), 144.3, 134.6, 134.2, 133.6, 132.5, 130.6, 130.3, 128.8, 128.5, 117.0 (t,  $J = 261.2$  Hz), 116.9 (t,  $J = 261.2$  Hz), 113.4, 93.0 (t,  $J = 21.1$  Hz), 85.3 (t,  $J = 21.1$  Hz), 29.8, 20.3, 16.3.

**$^{19}F$  NMR (565 MHz,  $CDCl_3$ )**  $\delta$  -106.2 (d,  $J = 271.2$  Hz, 1F), -108.7 (d,  $J = 271.2$  Hz, 1F), -108.9 (d,  $J = 271.2$  Hz, 1F), -113.6 (d,  $J = 271.2$  Hz, 1F).

**IR (neat):** 3077, 2923, 1693, 1596, 1448, 1280, 1113, 1069, 913, 825, 711.

**HRMS (ESI-TOF):** calculated for [ $C_{22}H_{18}F_4O_3SNa$  ( $M + Na^+$ )]: 461.0805, found: 461.0803.

## 6 General procedure for mono-difluoroalkylative dearomatization of aryl sulfoxide **1a**

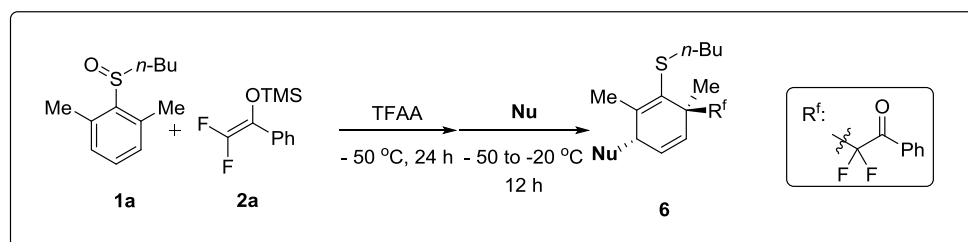

To a stirred solution of sulfoxide **1a** (63 mg, 0.3 mmol) and difluoroenol silyl ether **2a** (103 mg, 1.5 equiv) in MeCN/DCM (9/1, 3 mL) was added TFAA (63  $\mu$ L, 1.5 equiv) at -50 °C. The mixture was then stirred at -50 °C for 24 h. After that, to the mixture was added different nucleophiles (2 equiv), and the resulting mixture was then slowly warmed up to -20 °C. After stirring for 12 h, the mixture was passed through a short silica gel column and concentrated under vacuum. The obtained residue was further purified by flash chromatography on silica gel giving the title compound **6**.

### 2-(4-allyl-2-(butylthio)-1,3-dimethylcyclohexa-2,5-dien-1-yl)-2,2-difluoro-1-phenylethan-1-one (**6a**):

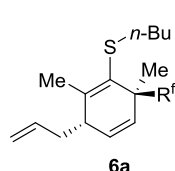

Following the general procedure, the title compound was obtained as light yellow oil, 76 mg, 65% yield. ( $R_f$  = 0.29, eluent: PE/EtOAc = 30/1).

**<sup>1</sup>H NMR (600 MHz, CDCl<sub>3</sub>):**  $\delta$  8.01 (d,  $J$  = 7.8 Hz, 2H), 7.56 (d,  $J$  = 7.4 Hz, 1H), 7.45 – 7.41 (m, 2H), 5.86 (dd,  $J$  = 10.0, 4.2 Hz, 1H), 5.82 – 5.74 (m, 1H),

5.66 (d,  $J$  = 10.0 Hz, 1H), 5.03 – 4.92 (m, 2H), 2.78 – 2.72 (m, 1H), 2.58 – 2.46 (m, 3H), 2.10 (s, 3H), 2.03 – 1.97 (m, 1H), 1.58 (s, 3H), 1.50 – 1.45 (m, 2H), 1.38 – 1.32 (m, 2H), 0.87 (t,  $J$  = 7.3 Hz, 3H).

**<sup>13</sup>C NMR (151 MHz, CDCl<sub>3</sub>):**  $\delta$  191.0 (t,  $J$  = 28.7 Hz), 148.3, 136.2, 134.8, 133.6, 130.7 (t,  $J$  = 3.0 Hz), 128.4, 128.2, 128.1, 127.8, 119.9 (t,  $J$  = 261.2 Hz), 116.8, 50.2 (t,  $J$  = 21.1 Hz), 43.9, 39.1, 36.8, 31.5, 22.9, 22.3, 21.2, 13.9.

**<sup>19</sup>F NMR (565 MHz, CDCl<sub>3</sub>)**  $\delta$  -102.9 (s, 2F).

**IR (neat):** 2956, 2928, 2870, 1691, 1596, 1447, 1275, 1094, 1042, 910, 713, 686.

**HRMS (ESI-TOF):** calculated for [C<sub>23</sub>H<sub>28</sub>F<sub>2</sub>OSNa (M + Na<sup>+</sup>)]: 413.1721, found: 413.1721.

**2-(2-(butylthio)-4-ethyl-1,3-dimethylcyclohexa-2,5-dien-1-yl)-2,2-difluoro-1-phenylethan-1-one (6b):**

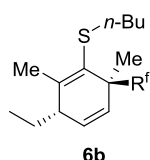

Following the general procedure, the title compound was obtained as light yellow oil, 74 mg, 65% yield. (*R*<sub>f</sub> = 0.23, eluent: PE/EtOAc = 30/1).

**<sup>1</sup>H NMR (600 MHz, CDCl<sub>3</sub>):** δ 7.91 (d, *J* = 7.8 Hz, 2H), 7.55 – 7.51 (m, 1H), 7.43 – 7.38 (m, 2H), 5.72 (dd, *J* = 10.1, 1.5 Hz, 1H), 5.56 (dd, *J* = 10.1, 2.7 Hz, 1H), 2.57 – 2.49 (m, 2H), 2.45 – 2.40 (m, 1H), 1.84 (s, 3H), 1.64 – 1.57 (m, 4H), 1.53 – 1.44 (m, 3H), 1.38 – 1.32 (m, 2H), 0.87 (t, *J* = 7.3 Hz, 3H), 0.62 (t, *J* = 7.4 Hz, 3H).

**<sup>13</sup>C NMR (151 MHz, CDCl<sub>3</sub>):** δ 191.0 (t, *J* = 28.7 Hz), 146.9, 135.1, 133.3, 130.5, 130.1 (t, *J* = 3.0 Hz), 129.3, 128.5, 128.2, 120.4 (t, *J* = 261.2 Hz), 49.3 (t, *J* = 21.1 Hz), 42.8, 36.8, 31.7, 25.4, 23.1, 22.2, 20.8, 13.8, 8.6.

**<sup>19</sup>F NMR (565 MHz, CDCl<sub>3</sub>)** δ -104.2 (d, *J* = 254.3 Hz, 1F), -105.0 (d, *J* = 254.3 Hz, 1F).

**IR (neat):** 2958, 2930, 2871, 1692, 1596, 1447, 1276, 1094, 1041, 912, 804, 713, 687.

**HRMS (ESI-TOF):** calculated for [C<sub>22</sub>H<sub>28</sub>F<sub>2</sub>OSNa (M + Na<sup>+</sup>): 401.1721, found: 401.1719.

**ethyl-3-(butylthio)-4-(1,1-difluoro-2-oxo-2-phenylethyl)-2,4-dimethylcyclohexa-2,5-dien-1-yl acetate (6c):**

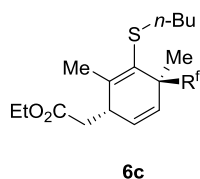

Following the general procedure, the title compound was obtained as light yellow oil, 80 mg, 62% yield. (*R*<sub>f</sub> = 0.20, eluent: PE/EtOAc = 10/1).

**<sup>1</sup>H NMR (600 MHz, CDCl<sub>3</sub>):** δ 7.99 (d, *J* = 7.9 Hz, 2H), 7.56 (d, *J* = 7.4 Hz, 1H), 7.46 – 7.40 (m, 2H), 5.93 (dd, *J* = 9.9, 4.3 Hz, 1H), 5.69 (d, *J* = 10.0 Hz, 1H), 4.21 – 4.08 (m, 2H), 3.26 – 3.17 (m, 1H), 2.67 (dd, *J* = 15.9, 4.1 Hz, 1H), 2.55 (t, *J* = 7.5 Hz, 2H), 2.23 (dd, *J* = 15.9, 10.2 Hz, 1H), 2.08 (s, 3H), 1.58 (s, 3H), 1.52 – 1.43 (m, 2H), 1.38 – 1.31 (m, 2H), 1.25 (t, *J* = 7.1 Hz, 3H), 0.86 (t, *J* = 7.3 Hz, 3H).

**<sup>13</sup>C NMR (151 MHz, CDCl<sub>3</sub>):** δ 190.6 (t, *J* = 28.7 Hz), 172.3, 147.3, 134.6, 133.7, 130.6, 130.1, 129.1, 128.7, 128.4, 119.7 (t, *J* = 261.2 Hz), 60.8, 50.0 (t, *J* = 21.1 Hz), 40.5, 39.1, 36.7, 31.5, 22.7, 22.3, 20.9, 14.3, 13.8.

**<sup>19</sup>F NMR (565 MHz, CDCl<sub>3</sub>)** δ -102.7 (d, *J* = 254.3 Hz, 1F), -103.2 (d, *J* = 254.3 Hz, 1F).

**IR (neat):** 2957, 2930, 2871, 1730, 1691, 1596, 1447, 1368, 1271, 1153, 1093, 1040, 910, 737, 687.

**HRMS (ESI-TOF):** calculated for [C<sub>24</sub>H<sub>30</sub>F<sub>2</sub>O<sub>3</sub>SNa (M + Na<sup>+</sup>): 459.1776, found: 459.1784.

**2-(butylthio)-4-(5-methoxythiophen-3-yl)-1,3-dimethylcyclohexa-2,5-dien-1-yl)-2,2-difluoro-1-phenylethan-1-one (6d):**

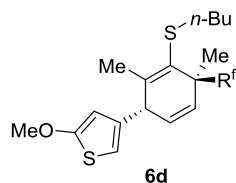

Following the general procedure, the title compound was obtained as light yellow oil, 98 mg, 71% yield. (R<sub>f</sub> = 0.31, eluent: PE/EtOAc = 10/1).

**<sup>1</sup>H NMR (600 MHz, CDCl<sub>3</sub>):** δ 7.96 (d, *J* = 7.7 Hz, 2H), 7.57 – 7.53 (m, 1H), 7.45 – 7.41 (m, 2H), 6.39 (d, *J* = 3.8 Hz, 1H), 5.94 (d, *J* = 3.8 Hz, 1H), 5.80 – 5.71 (m, 2H), 3.81 (s, 3H), 3.72 (s, 1H), 2.52 – 2.46 (m, 2H), 1.77 (s, 3H), 1.70 (s, 3H), 1.52 – 1.47 (m, 2H), 1.38 – 1.31 (m, 2H), 0.87 (t, *J* = 7.3 Hz, 3H).

**<sup>13</sup>C NMR (151 MHz, CDCl<sub>3</sub>):** δ 190.7 (t, *J* = 28.7 Hz), 165.9, 146.1, 134.9, 133.6, 132.8, 130.1 (t, *J* = 3.0 Hz), 130.0, 128.3, 127.0, 122.3, 120.1 (t, *J* = 261.2 Hz), 102.6, 60.1, 49.1 (t, *J* = 21.1 Hz), 45.4, 36.5, 31.7, 22.7, 22.2, 21.9, 13.8.

**<sup>19</sup>F NMR (565 MHz, CDCl<sub>3</sub>)** δ -103.8 (d, *J* = 254.3 Hz, 1F), -104.5 (d, *J* = 254.3 Hz, 1F).

**IR (neat):** 2955, 2931, 2871, 1691, 1596, 1560, 1501, 1447, 1208, 1094, 1036, 908, 806, 729, 687.

**HRMS (ESI-TOF):** calculated for [C<sub>25</sub>H<sub>28</sub>F<sub>2</sub>O<sub>2</sub>S<sub>2</sub>Na (M + Na<sup>+</sup>): 485.1391, found: 485.1378.

**2-(2-(butylthio)-4-(1H-indol-3-yl)-1,3-dimethylcyclohexa-2,5-dien-1-yl)-2,2-difluoro-1-phenyl ethan-1-one (6e):**

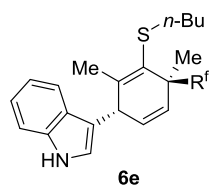

Following the general procedure, the title compound was obtained as light yellow oil, 91 mg, 65% yield. (R<sub>f</sub> = 0.21, eluent: PE/EtOAc = 5/1).

**<sup>1</sup>H NMR (600 MHz, CDCl<sub>3</sub>):** δ 8.14 (bs, 1H), 8.05 (d, *J* = 7.7 Hz, 2H), 7.63 – 7.55 (m, 1H), 7.51 – 7.41 (m, 3H), 7.36 (d, *J* = 8.2 Hz, 1H), 7.20 – 7.15 (m, 1H), 7.07 – 7.01 (m, 1H), 6.94 (d, *J* = 2.4 Hz, 1H), 5.84 (dd, *J* = 9.9, 2.4 Hz, 1H), 5.78 (dd, *J* = 9.9, 2.4 Hz, 1H), 3.88 (s, 1H), 2.52 (t, *J* = 7.5 Hz, 2H), 1.84 (s, 3H), 1.71 (s, 3H), 1.54 – 1.45 (m, 2H), 1.36 – 1.30 (m, 2H), 0.84 (t, *J* = 7.4 Hz, 3H).

**<sup>13</sup>C NMR (151 MHz, CDCl<sub>3</sub>):** δ 191.1 (t, *J* = 28.7 Hz), 148.1, 136.6, 134.9, 133.6, 131.5, 130.2 (t,

$J = 3.0$  Hz), 128.3, 127.5, 126.6, 126.5, 122.4, 122.3, 120.6 (t,  $J = 261.2$  Hz), 119.4, 119.1, 118.8, 111.5, 49.4 (t,  $J = 21.1$  Hz), 41.4, 36.7, 31.8, 22.6, 22.2, 22.1, 13.8.

$^{19}\text{F}$  NMR (565 MHz,  $\text{CDCl}_3$ )  $\delta$  -103.8 (d,  $J = 271.2$  Hz, 1F), -104.6 (d,  $J = 271.2$  Hz, 1F).

IR (neat): 3408, 2955, 2870, 1688, 1595, 1454, 1275, 1092, 1039, 909, 811, 735, 687.

HRMS (ESI-TOF): calculated for  $[\text{C}_{28}\text{H}_{29}\text{F}_2\text{NOSNa} (\text{M} + \text{Na}^+)]$ : 488.1830, found: 488.1832.

**2-(2-(butylthio)-4-(2-hydroxynaphthalen-1-yl)-1,3-dimethylcyclohexa-2,5-dien-1-yl)-2,2-difluoro-1-phenylethan-1-one (6f):**

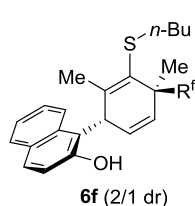

Following the general procedure B, the title compound was obtained as light yellow oil, 74 mg, 51% yield. ( $R_f = 0.37$ , eluent: PE/EtOAc = 3/1).

$^1\text{H}$  NMR (600 MHz,  $\text{CDCl}_3$ ):  $\delta$  8.11 – 8.06 (m, 2H), 7.89 – 7.77 (m, 2H), 7.76 – 7.68 (m, 1H), 7.65 – 7.60 (m, 1H), 7.59 – 7.55 (m, 0.45H), 7.55 – 7.49 (m, 2H), 7.46 (t,  $J = 7.8$  Hz, 0.84H), 7.37 (t,  $J = 7.4$  Hz, 0.67H), 7.29 – 7.22 (m, 1.18H, overlap with protons of  $\text{CDCl}_3$ ), 7.07 – 7.01 (m, 1H), 6.03 (dd,  $J = 9.8, 2.6$  Hz, 0.64H), 5.89 – 5.77 (m, 1.43H), 5.45 (s, 1H), 4.84 (s, 0.39H), 4.60 (s, 0.63H), 2.65 – 2.47 (m, 2H), 1.89 (s, 1.21H), 1.82 (s, 1.97H), 1.71 (s, 2H), 1.60 (s, 1.25H), 1.56 – 1.47 (m, 2H), 1.40 – 1.35 (m, 1H), 1.34 – 1.28 (m, 1H), 0.88 (t,  $J = 7.3$  Hz, 1.95H), 0.83 (t,  $J = 7.4$  Hz, 1.2H).

$^{13}\text{C}$  NMR (151 MHz,  $\text{CDCl}_3$ ):  $\delta$  191.3 (t,  $J = 28.7$  Hz), 190.5 (t,  $J = 28.7$  Hz), 153.5, 150.5, 150.2, 147.8, 134.7, 134.5, 134.0, 133.7, 133.6, 132.9, 132.5, 130.4, 130.2, 129.9, 129.8, 129.5, 129.2, 129.1, 128.7, 128.5, 128.4, 127.2, 126.4, 125.8, 123.7, 123.4, 123.3, 121.9, 120.1 (t,  $J = 261.2$  Hz), 119.6 (t,  $J = 261.2$  Hz), 118.9, 117.9, 117.7, 50.0 (t,  $J = 21.1$  Hz), 49.4 (t,  $J = 21.1$  Hz), 40.6, 40.5, 36.9, 36.5, 31.9, 31.7, 22.7, 22.3, 22.2, 22.1, 21.4, 21.3, 13.8, 13.7.

$^{19}\text{F}$  NMR (565 MHz,  $\text{CDCl}_3$ )  $\delta$  -103.8 – -105.6 (m, 2F).

IR (neat): 3438, 2955, 2927, 2870, 1681, 1625, 1596, 1513, 1446, 1271, 1095, 1040, 909, 803, 716, 686.

HRMS (ESI-TOF): calculated for  $[\text{C}_{30}\text{H}_{30}\text{F}_2\text{O}_2\text{SNa} (\text{M} + \text{Na}^+)]$ : 515.1827, found: 515.1828.

**2-(2-(butylthio)-4-((4-chlorophenyl)thio)-1,3-dimethylcyclohexa-2,5-dien-1-yl)-2,2-difluoro-1-phenylethan-1-one (6g):**



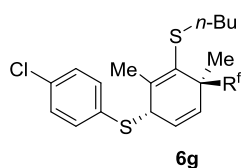

Following the general procedure, the title compound was obtained as light yellow oil, 96 mg, 65% yield. ( $R_f = 0.26$ , eluent: PE/EtOAc = 30/1).

**$^1\text{H NMR}$  (600 MHz,  $\text{CDCl}_3$ ):**  $\delta$  (d,  $J = 7.7$  Hz, 0.30H), 7.89 (d,  $J = 7.7$  Hz, 1.70H), 7.62 – 7.54 (m, 1H), 7.50 – 7.36 (m, 2.37H), 7.29 (d,  $J = 8.1$  Hz, 2H), 7.23 (d,  $J = 8.1$  Hz, 1.62H), 6.01 (dd,  $J = 9.8, 4.2$  Hz, 0.12H), 5.93 (dd,  $J = 10.0, 2.7$  Hz, 0.84H), 5.79 (d,  $J = 9.8$  Hz, 0.15H), 5.74 (d,  $J = 10.0$  Hz, 0.84H), 4.06 (s, 0.12H), 3.79 (s, 0.85H), 2.38 – 2.32 (m, 1H), 2.28 (s, 0.40H), 2.16 – 2.02 (m, 3.62H), 1.42 – 1.26 (m, 4.31H), 1.20 (s, 2.84H), 0.90 (t,  $J = 7.2$  Hz, 3H).

**$^{13}\text{C NMR}$  (151 MHz,  $\text{CDCl}_3$ ):**  $\delta$  190.5 (t,  $J = 28.7$  Hz), 143.7, 142.6, 136.9, 135.2, 135.0, 134.4, 133.7, 133.5, 133.0, 130.7 (t,  $J = 3.0$  Hz), 130.0 (t,  $J = 3.0$  Hz), 129.8, 129.3, 129.2, 128.8, 128.4, 128.3, 128.0, 127.8, 119.6 (t,  $J = 261.2$  Hz), 52.6, 51.5, 49.3 (t,  $J = 21.1$  Hz), 36.9, 36.7, 31.6, 31.4, 22.4, 22.3, 22.2, 21.9, 21.7, 13.8.

**$^{19}\text{F NMR}$  (565 MHz,  $\text{CDCl}_3$ )**  $\delta$  -101.3 (d,  $J = 271.2$  Hz, 0.25F), -102.3 (d,  $J = 271.2$  Hz, 0.25F), -104.2 (s, 3.46F).

**IR (neat):** 2956, 2928, 2871, 1692, 1596, 1474, 1173, 1092, 1013, 907, 805, 726, 688.

**HRMS (ESI-TOF):** calculated for  $[\text{C}_{26}\text{H}_{27}\text{ClF}_2\text{OS}_2\text{Na} (\text{M} + \text{Na}^+)]$ : 515.1052, found: 515.1057.

**N-(3-(butylthio)-4-(1,1-difluoro-2-oxo-2-phenylethyl)-2,4-dimethylcyclohexa-2,5-dien-1-yl)-4-methylbenzenesulfonamide (6h):**

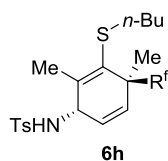

Following the general procedure, the title compound was obtained as light yellow oil, 101 mg, 65% yield. ( $R_f = 0.23$ , eluent: PE/EtOAc = 10/1).

**$^1\text{H NMR}$  (600 MHz,  $\text{CDCl}_3$ ):**  $\delta$  8.00 (d,  $J = 7.9$  Hz, 2H), 7.76 (d,  $J = 8.1$  Hz, 2H), 7.62 (t,  $J = 7.3$  Hz, 1H), 7.49 – 7.45 (m, 2H), 7.30 (d,  $J = 8.1$  Hz, 2H), 5.75 (d,  $J = 9.9$  Hz, 1H), 5.33 (dd,  $J = 9.9, 4.4$  Hz, 1H), 4.84 (d,  $J = 10.0$  Hz, 1H), 4.22 (dd,  $J = 10.1, 4.4$  Hz, 1H), 2.53 – 2.37 (m, 5H), 2.03 (s, 3H), 1.51 (s, 3H), 1.45 – 1.37 (m, 2H), 1.32 – 1.26 (m, 2H), 0.81 (t,  $J = 7.3$  Hz, 3H).

**$^{13}\text{C NMR}$  (151 MHz,  $\text{CDCl}_3$ ):**  $\delta$  190.0 (t,  $J = 28.7$  Hz), 143.7, 143.6, 138.6, 134.4, 135.5, 132.7, 132.3, 130.4 (t,  $J = 3.0$  Hz), 129.9, 128.7, 127.1, 125.9, 118.8 (t,  $J = 261.2$  Hz), 52.3, 48.6 (t,  $J = 21.1$  Hz), 36.3, 31.5, 22.1, 21.7, 19.9, 13.7.

**$^{19}\text{F NMR}$  (565 MHz,  $\text{CDCl}_3$ )**  $\delta$  -101.3 (d,  $J = 254.3$  Hz, 1F), -101.8 (d,  $J = 254.3$  Hz, 1F).

**IR (neat):** 3326, 2956, 2871, 1692, 1596, 1447, 1330, 1156, 1093, 1044, 906, 814, 713, 662.

**HRMS (ESI-TOF):** calculated for [C<sub>27</sub>H<sub>31</sub>F<sub>2</sub>NO<sub>3</sub>S<sub>2</sub>Na (M + Na<sup>+</sup>): 542.1606, found: 542.1601.

**2-(1,1-difluoro-2-oxo-2-phenylethyl)-2-methylnaphthalen-1(2H)-one (7a):**

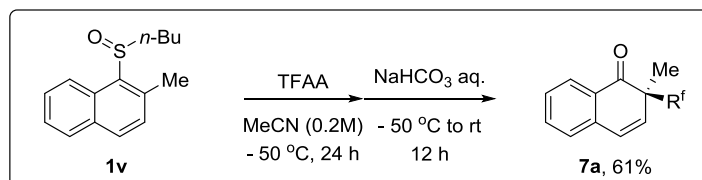

To a stirred solution of sulfoxide **1v** (74 mg, 0.3 mmol) and difluoroenol silyl ether **2a** (103 mg, 1.5 equiv) in MeCN (1.5 mL) was added TFAA (63  $\mu$ L, 1.5 equiv) at -50 °C. The mixture was then stirred for 24 h. After that, to the mixture was added NaHCO<sub>3</sub> (1.0 mL), and the resulting mixture was then slowly warmed up to rt. After stirring for 12 h, the mixture was passed through a short silica gel column and concentrated under vacuum. The obtained residue was further purified by flash chromatography on silica gel giving the title compound **7a** as light yellow oil, 48 mg, 61% yield. (R<sub>f</sub> = 37, eluent: PE/EtOAc = 10/1)

**<sup>1</sup>H NMR (600 MHz, CDCl<sub>3</sub>):**  $\delta$  8.11 – 8.03 (m, 3H), 7.64 – 7.56 (m, 2H), 7.50 – 7.39 (m, 3H), 7.31 (d, *J* = 7.6 Hz, 1H), 6.71 (d, *J* = 9.9 Hz, 1H), 6.22 (d, *J* = 9.9 Hz, 1H), 1.56 (s, 3H).

**<sup>13</sup>C NMR (151 MHz, CDCl<sub>3</sub>):**  $\delta$  196.9, 187.7 (t, *J* = 28.7 Hz), 137.7, 134.6, 134.5, 132.5 (m), 131.9, 130.5 (t, *J* = 3.0 Hz), 129.3, 128.7, 127.9, 127.4, 125.9, 120.1, 120.0 (t, *J* = 261.2 Hz), 53.0 (t, *J* = 21.1 Hz), 19.4 (m).

**<sup>19</sup>F NMR (565 MHz, CDCl<sub>3</sub>)**  $\delta$  -101.0 (d, *J* = 254.3 Hz, 1F), -103.4 (d, *J* = 254.3 Hz, 1F).

**IR (neat):** 3059, 2936, 1677, 1596, 1448, 1291, 1145, 1064, 945, 785, 713, 684.

**HRMS (ESI-TOF):** calculated for [C<sub>19</sub>H<sub>14</sub>F<sub>2</sub>O<sub>2</sub>Na (M + Na<sup>+</sup>): 335.0854, found: 335.0854.

**2-(1,1-difluoro-2-oxo-2-phenylethyl)-2-methyl-1-tosylindolin-3-one (7b):**

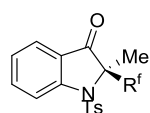

**7b**

Following a similar procedure for the synthesis of **7b**, the title compound was obtained as light yellow oil, 78 mg, 57% yield. (R<sub>f</sub> = 0.29, eluent: PE/EtOAc = 10/1).

**<sup>1</sup>H NMR (600 MHz, CDCl<sub>3</sub>):**  $\delta$  8.06 (d, *J* = 8.5 Hz, 1H), 7.87 (d, *J* = 7.8 Hz, 2H), 7.82 (d, *J* = 7.5 Hz, 1H), 7.71 – 7.65 (m, 3H), 7.63 – 7.58 (m, 1H), 7.45 – 7.39 (m, 2H), 7.29 – 7.25 (m, 1H), 7.08 (d, *J* = 8.2 Hz, 2H), 2.26 (s, 3H), 1.98 (s, 3H).

**<sup>13</sup>C NMR (151 MHz, CDCl<sub>3</sub>):**  $\delta$  193.1, 187.7 (t, *J* = 28.7 Hz), 152.6, 144.8, 137.2, 134.5, 132.3,

130.4, 130.3, 129.7, 128.5, 127.1, 124.9, 124.6, 123.9, 116.9 (t,  $J = 261.2$  Hz), 116.5, 29.8, 21.6, 17.0.

$^{19}\text{F}$  NMR (565 MHz,  $\text{CDCl}_3$ )  $\delta$  -103.1 (s, 1F), -103.6 (s, 1F).

IR (neat): 2923, 2853, 1722, 1692, 1611, 1596, 1466, 1322, 1166, 1084, 1067, 750, 714, 659, 575.

HRMS (ESI-TOF): calculated for  $[\text{C}_{24}\text{H}_{19}\text{F}_2\text{NO}_4\text{SNa} (\text{M} + \text{Na}^+)]$ : 478.0895, found: 478.0891.

### 7 Examination of difluoroenol silyl ethers 2b-2d.

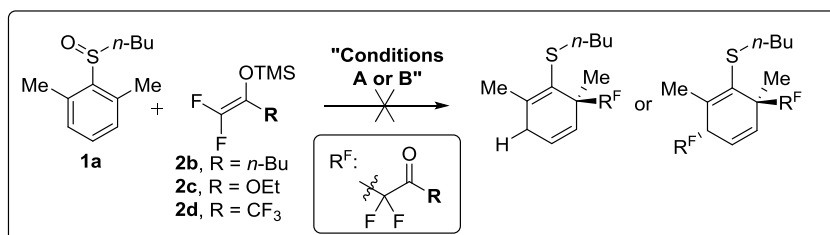

Following the general procedure A and B, the reaction of sulfoxide **1a** (63 mg, 0.3 mmol) with difluoroenol silyl ethers **2b-2d** was carried out. The progress of the reaction was monitored by TLC. During the whole process, no expected product was determined from these reactions.

## 8 Gram-scale reactions and conversion of product **3a** to highly substituted difluoroalkylated cyclohexenones.

### 8.1 Gram-scale reactions for the synthesis of **3a** and **4a**

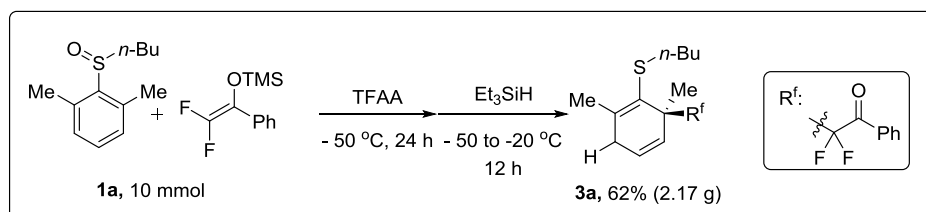

Following the general procedure A, the reaction of sulfoxide **1a** (2.1 g, 10 mmol) produced the title compound **3a**, 2.17 g, 62% yield.

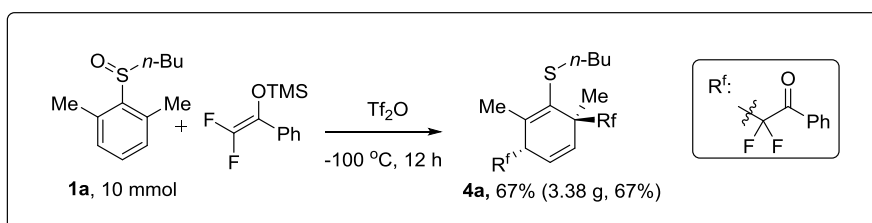

Following the general procedure B, the reaction of sulfoxide **1a** (2.1 g, 10 mmol) produced the title compound **4a**, 3.38 g, 67% yield.

### 8.2 Conversion of products **3a** to highly substituted difluoroalkylated cyclohexenones.

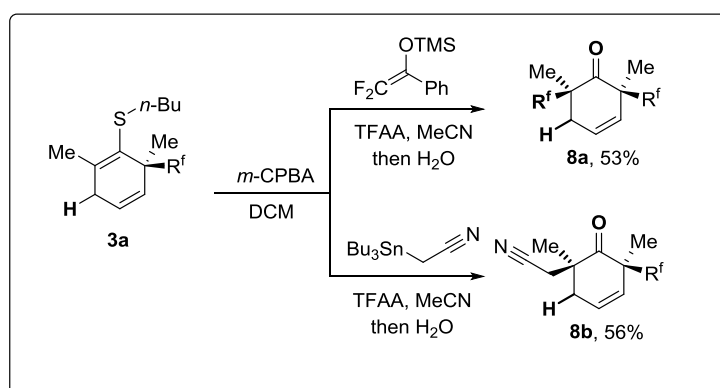

To a solution of sulfide **3a** (70 mg, 0.2 mmol) in DCM (2 mL, 0.1 M) was added a solution of *m*-CPBA (38 mg, 1.1 equiv.) in DCM (0.44 mL, 0.5 M) at 0 °C. After sulfides **3a** was completely consumed, the reaction was quenched with sat. aq. NaHCO<sub>3</sub>. The organic layer was separated, and the aqueous layer was extracted with CH<sub>2</sub>Cl<sub>2</sub>. The combined organic layers were washed with

brine, dried over Na<sub>2</sub>SO<sub>4</sub>, filtrated and concentrated in vacuum. The obtained sulfoxides were directly used for the next step.

To the solution of sulfoxides obtained following the above procedure was added nucleophiles difluoroenol silyl ether **2a** (69 mg, 1.5 equiv) or  $\alpha$ -stannyl nitrile (99 mg, 1.5 equiv), and TFAA (42  $\mu$ L, 1.5 equiv) at -40 °C. After stirring for 12 h, sat. aq. NaHCO<sub>3</sub> (1.0 mL) was added, and the resulting mixture was then slowly warmed up to rt and kept stirring for another 12 h. After that, the mixture was passed through a short silica gel column and concentrated under vacuum. The obtained residue was further purified by flash chromatography on silica gel giving compound **8a** or **8b**.

**2,2'-(1,3-dimethyl-2-oxocyclohex-4-ene-1,3-diyl)bis(2,2-difluoro-1-phenylethan-1-one) (8a):**

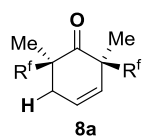

Following the general procedure, the title compound **8a** was obtained as light yellow oil, 46 mg, 53% yield. (R<sub>f</sub> = 0.55, eluent: PE/EtOAc = 10/1)

<sup>1</sup>H NMR (600 MHz, CDCl<sub>3</sub>):  $\delta$  8.04 (d, *J* = 7.7 Hz, 2H), 8.00 (d, *J* = 7.6 Hz, 2H), 7.59 (dd, *J* = 15.6, 7.5 Hz, 2H), 7.45 (dd, *J* = 15.8, 8.0 Hz, 4H), 6.06 – 5.90 (m, 2H), 2.99 – 2.94 (m, 1H), 2.50 – 2.41 (m, 1H), 1.66 (s, 3H), 1.58 (d, *J* = 1.3 Hz, 3H).

<sup>13</sup>C NMR (151 MHz, CDCl<sub>3</sub>):  $\delta$  207.7, 188.9 (t, *J* = 28.7 Hz), 188.7 (t, *J* = 28.7 Hz), 134.3, 134.2, 133.1, 130.4, 130.3, 128.7, 128.6, 127.9, 125.5, 119.8 (t, *J* = 261.2 Hz), 119.1 (t, *J* = 261.2 Hz), 54.6 (t, *J* = 21.1 Hz), 52.3 (t, *J* = 21.2 Hz), 31.6, 20.8, 20.3.

<sup>19</sup>F NMR (565 MHz, CDCl<sub>3</sub>)  $\delta$  -99.8 (d, *J* = 254.3 Hz, 1F), -101.8 (d, *J* = 254.3 Hz, 1F), -102.4 (d, *J* = 254.3 Hz, 1F), -104.4 (d, *J* = 254.3 Hz, 1F).

IR (neat): 3062, 2950, 2852, 1701, 1596, 1449, 1298, 1147, 1051, 994, 844, 709, 659.

HRMS (ESI-TOF): calculated for [C<sub>24</sub>H<sub>20</sub>F<sub>4</sub>O<sub>3</sub>Na (M + Na<sup>+</sup>)]: 455.1241, found: 455.1240.

**2-(5-(1,1-difluoro-2-oxo-2-phenylethyl)-1,5-dimethyl-6-oxocyclohex-3-en-1-yl)acetonitrile (8b):**

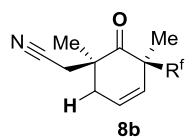

Following the general procedure, the title compound **8b** was obtained as light yellow oil, 53 mg, 56% yield. (R<sub>f</sub> = 43, eluent: PE/EtOAc = 10/1)

<sup>1</sup>H NMR (600 MHz, CDCl<sub>3</sub>):  $\delta$  8.04 (d, *J* = 7.7 Hz, 2H), 7.65 – 7.60 (m, 1H), 7.50 – 7.44 (m, 2H), 6.05 – 5.95 (m, 1H), 5.63 – 5.59 (m, 1H), 3.03 (d, *J* = 17.0 Hz, 1H), 2.86 (d, *J* = 17.0 Hz, 1H), 2.70 (d, *J* = 17.0 Hz, 1H), 2.51 (dd, *J* = 17.0, 6.6 Hz, 1H), 1.52 (d, *J* = 1.5 Hz,

3H), 1.36 (s, 3H).

$^{13}\text{C}$  NMR (151 MHz,  $\text{CDCl}_3$ ):  $\delta$  208.7, 188.0 (t,  $J = 28.7$  Hz), 134.9, 131.5, 130.5, 128.8, 128.1, 127.1, 120.1 (t,  $J = 261.2$  Hz), 118.2, 50.7 (t,  $J = 21.1$  Hz), 45.2, 36.5, 26.7, 24.2, 20.0, 19.9.

$^{19}\text{F}$  NMR (565 MHz,  $\text{CDCl}_3$ )  $\delta$  -96.6 (d,  $J = 254.3$  Hz, 1F), -102.5 (d,  $J = 254.3$  Hz, 1F).

IR (neat): 2982, 2939, 2245, 1693, 1596, 1448, 1203, 1149, 1064, 1003, 930, 882, 711, 648.

HRMS (ESI-TOF): calculated for  $[\text{C}_{18}\text{H}_{17}\text{F}_2\text{NO}_2\text{Na} (\text{M} + \text{Na}^+)]$ : 340.1120, found: 340.1117

The relative configuration of **8b** was assigned according to the NOE analysis, and the corresponding spectrum was shown as blow.

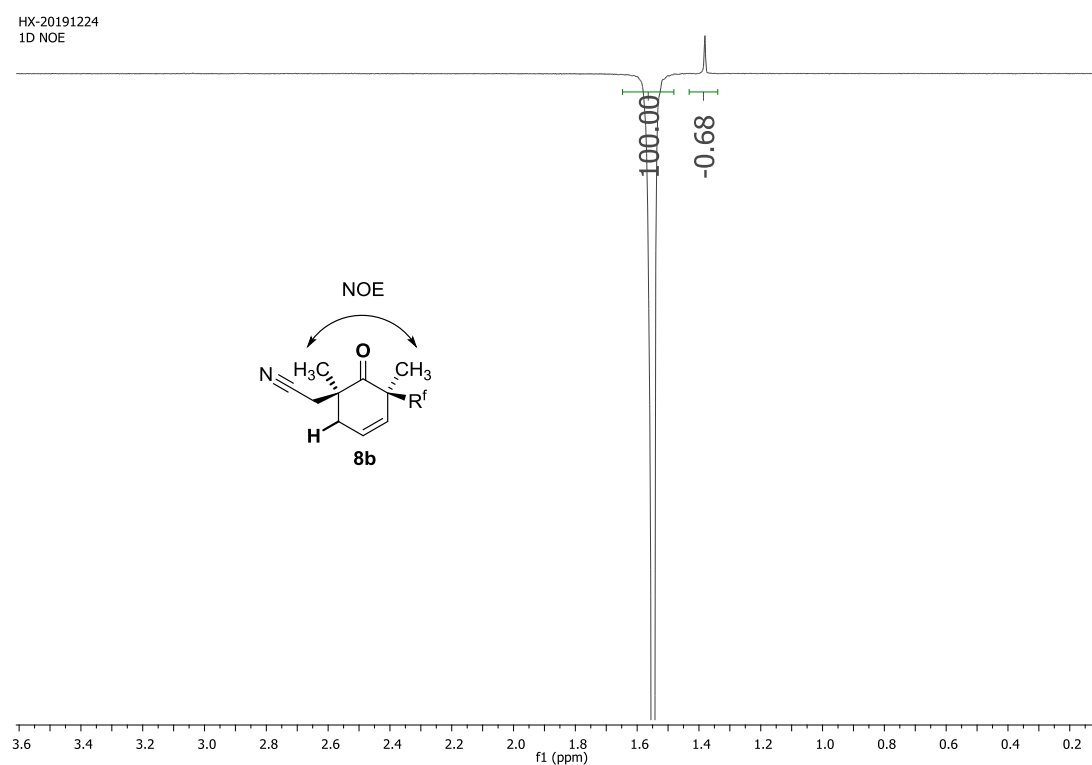

## 9 NMR spectra

06272019-18 (ZYG-05-13) TMS S(n-Bu)

7.22  
7.20  
7.19  
7.03  
7.02

3.28  
3.27  
3.27  
3.26  
3.26  
3.25  
3.25  
3.24  
2.85  
2.83  
2.83  
2.82  
2.81  
2.81  
2.80  
2.56

1.51  
1.51  
1.48  
0.95  
0.94  
0.93

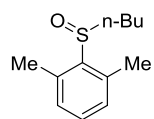

**1a**

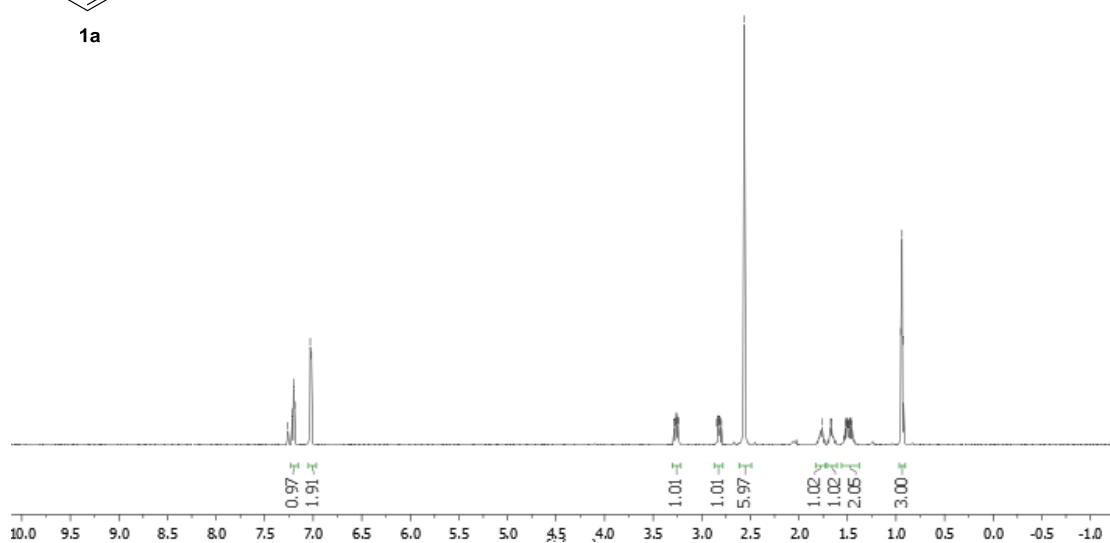

06272019-18 (ZYG-05-13) TMS S(n-Bu)

138.39  
138.26  
130.81  
130.26

77.37  
77.16  
76.95

-52.14

25.83  
22.04  
19.35  
13.77

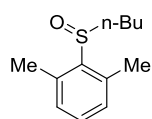

**1a**

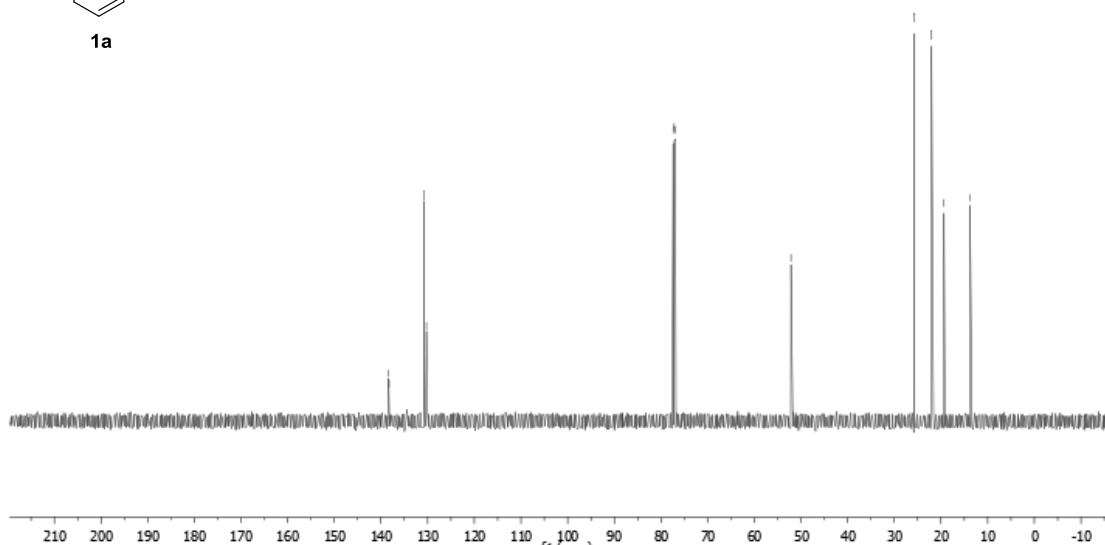

06272019-16 (ZYG-05-06B) 甲基基 SMe

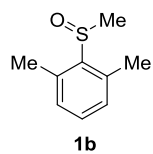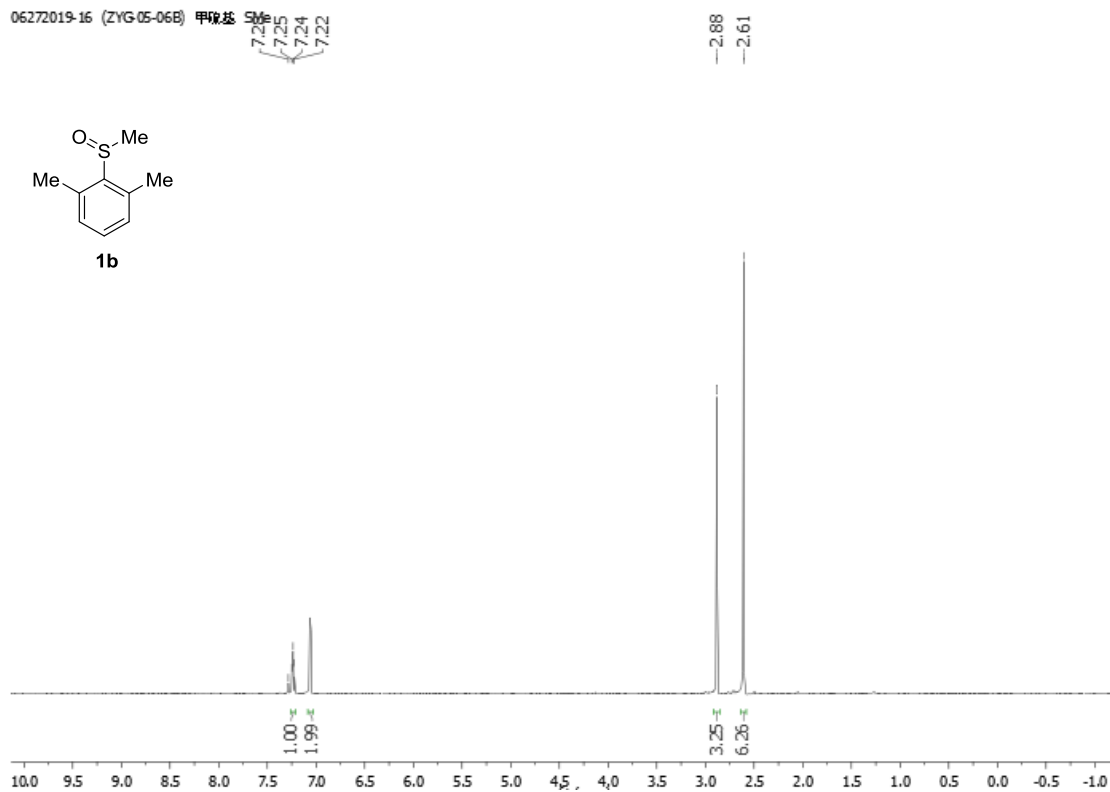

06272019-16 (ZYG-05-06B) 甲基基 SMe

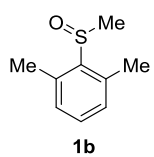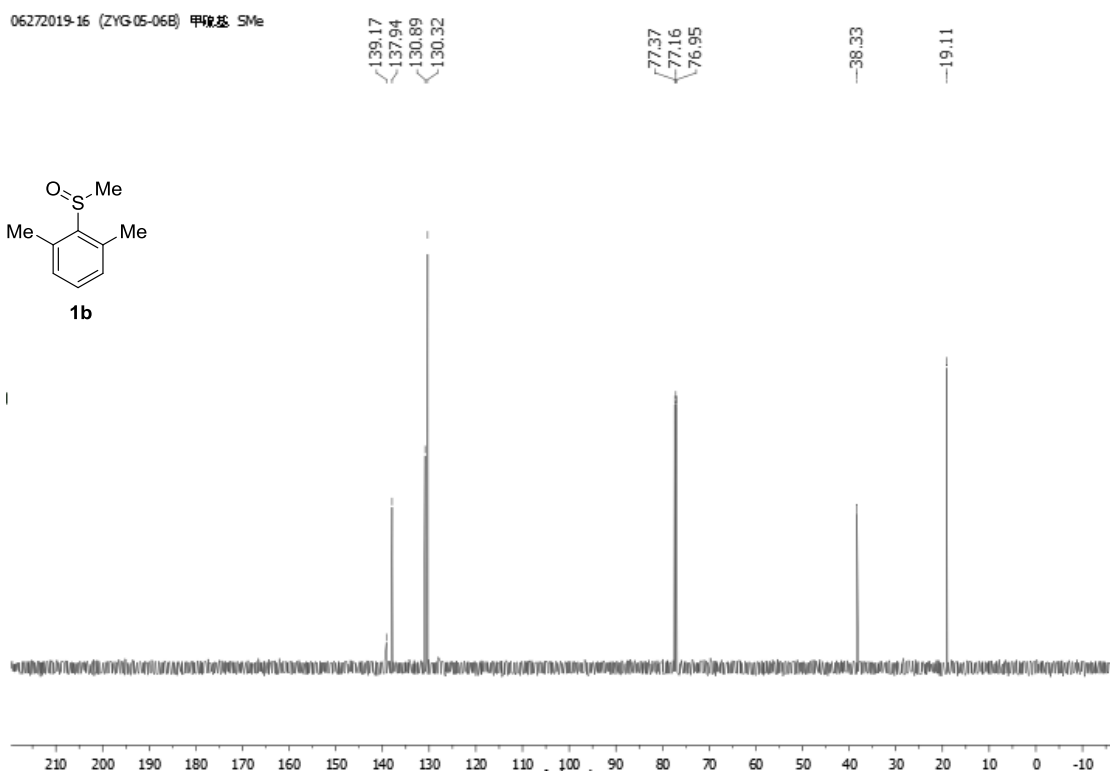



10092019-57 (ZYG-05-105) 长链苯

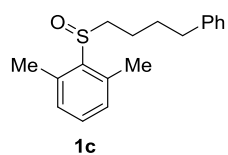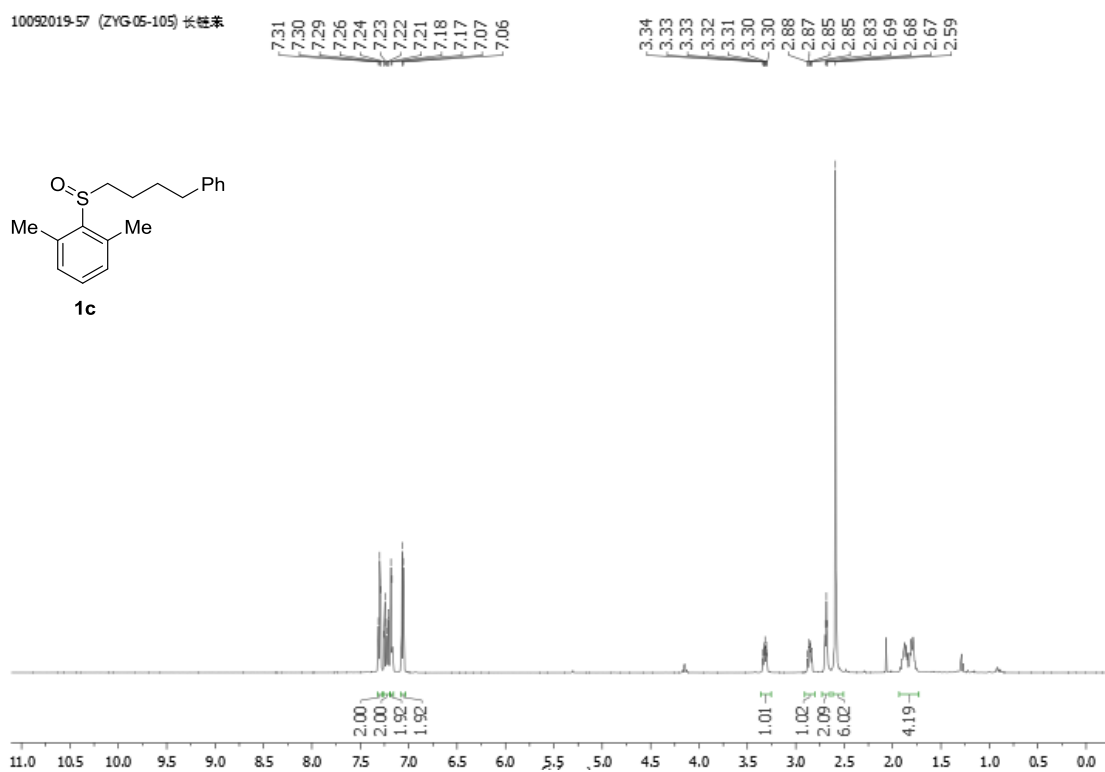

10092019-57 (ZYG-05-105) 长链苯

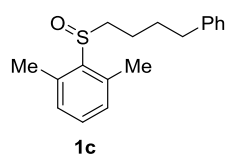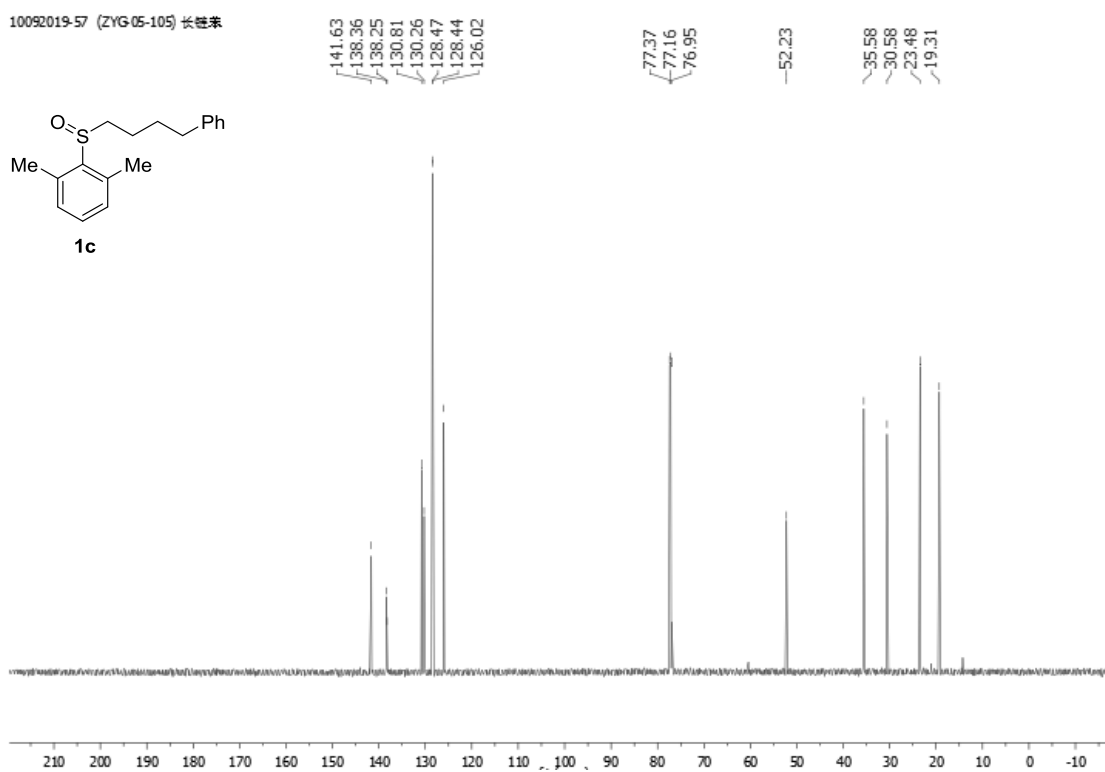

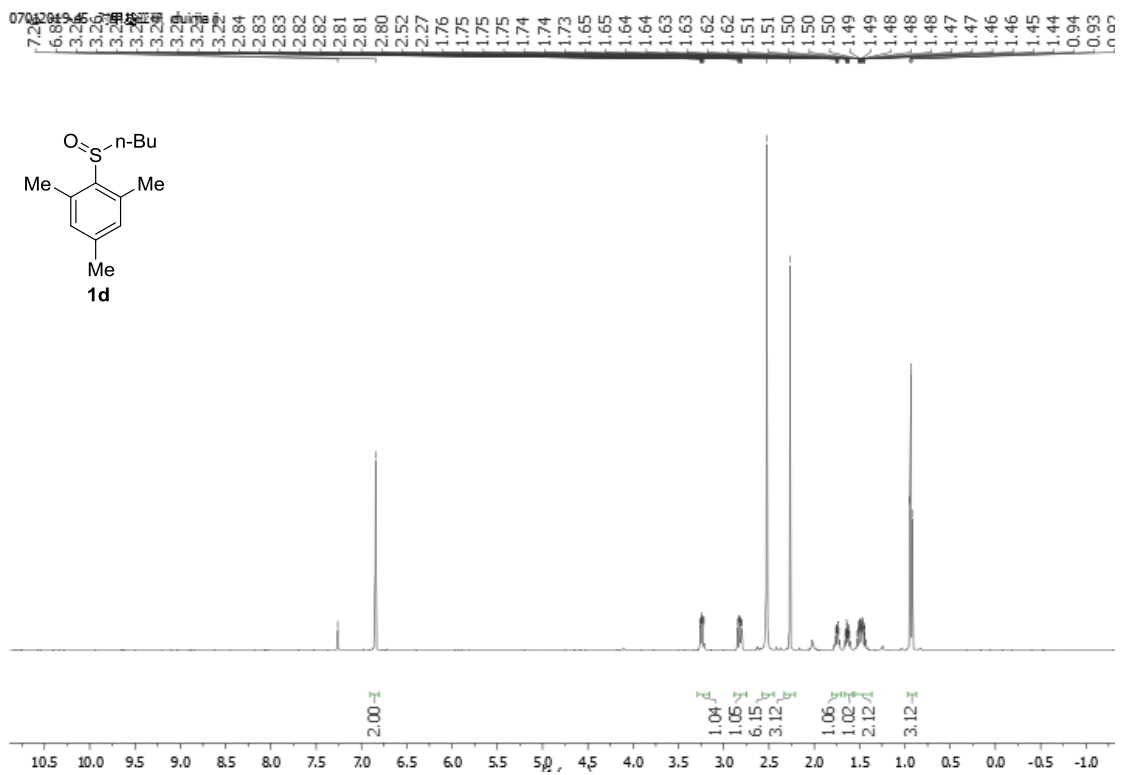

07012019-45 对甲基亚砜 duijia ji

141.04  
138.39  
135.12  
130.99

77.37  
77.16  
76.95

52.32

25.86  
22.07  
21.10  
19.29  
13.78

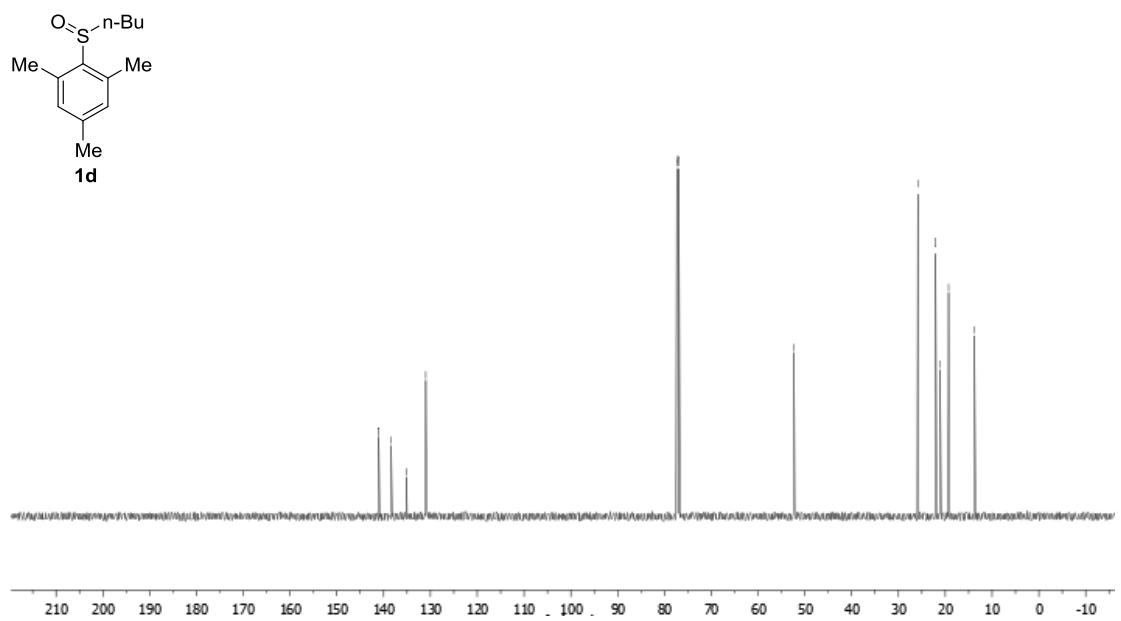

11.82, 9.19, 7.52, 7.51, 7.45, 7.44, 7.43, 7.38, 7.37, 7.36, 7.26, 3.34, 3.33, 3.32, 3.31, 3.31, 3.31, 3.30, 3.29, 2.91, 2.90, 2.89, 2.89, 2.88, 2.87, 2.87, 2.86, 2.64, 1.82, 1.82, 1.81, 1.81, 1.80, 1.72, 1.71, 1.70, 1.56, 1.55, 1.55, 1.54, 1.54, 1.53, 1.53, 1.52, 1.52, 1.51, 1.51, 1.50, 1.50, 1.49, 1.49, 0.98

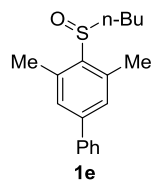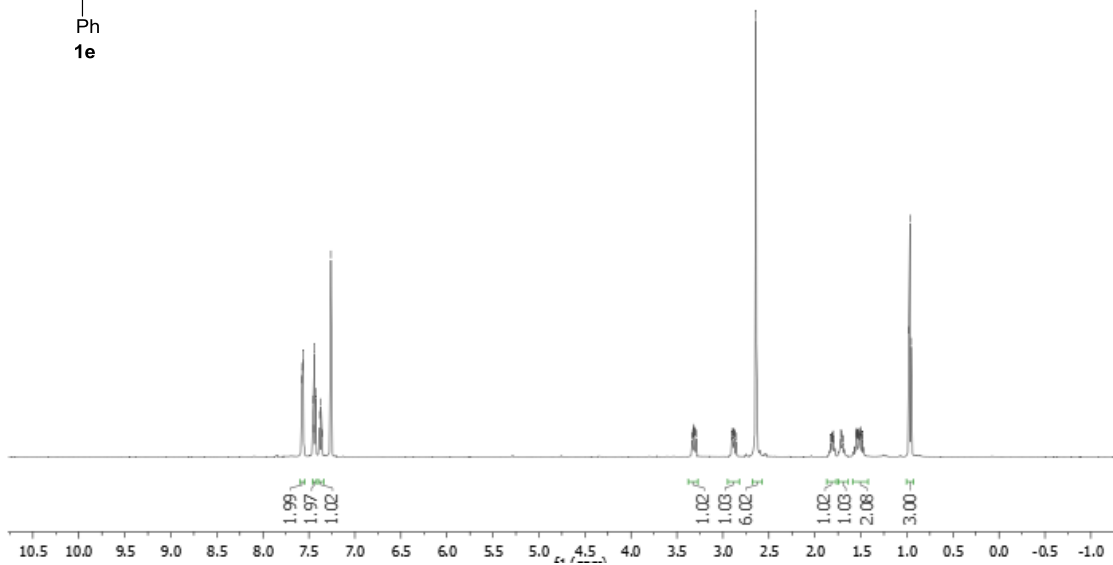

07172019-23 (ZYG-05-40) 对苯基 对苯基

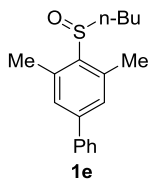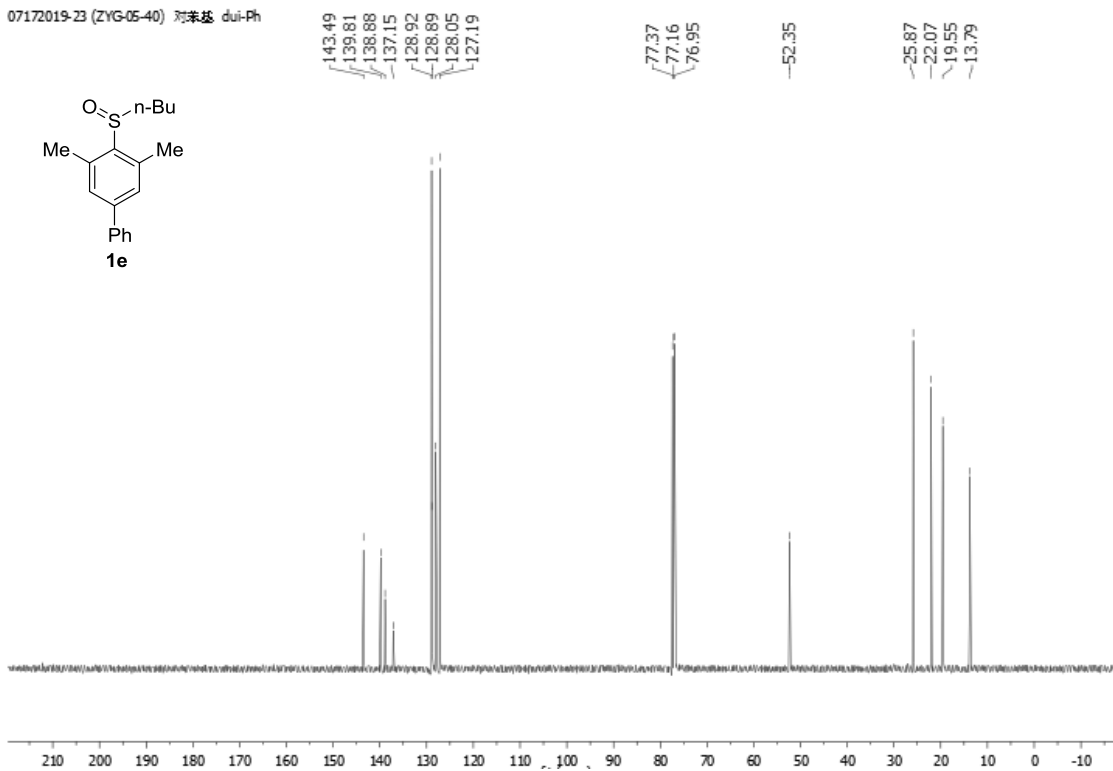

09102019-20 (ZYG-05-67) 对苯基 dui bian lv

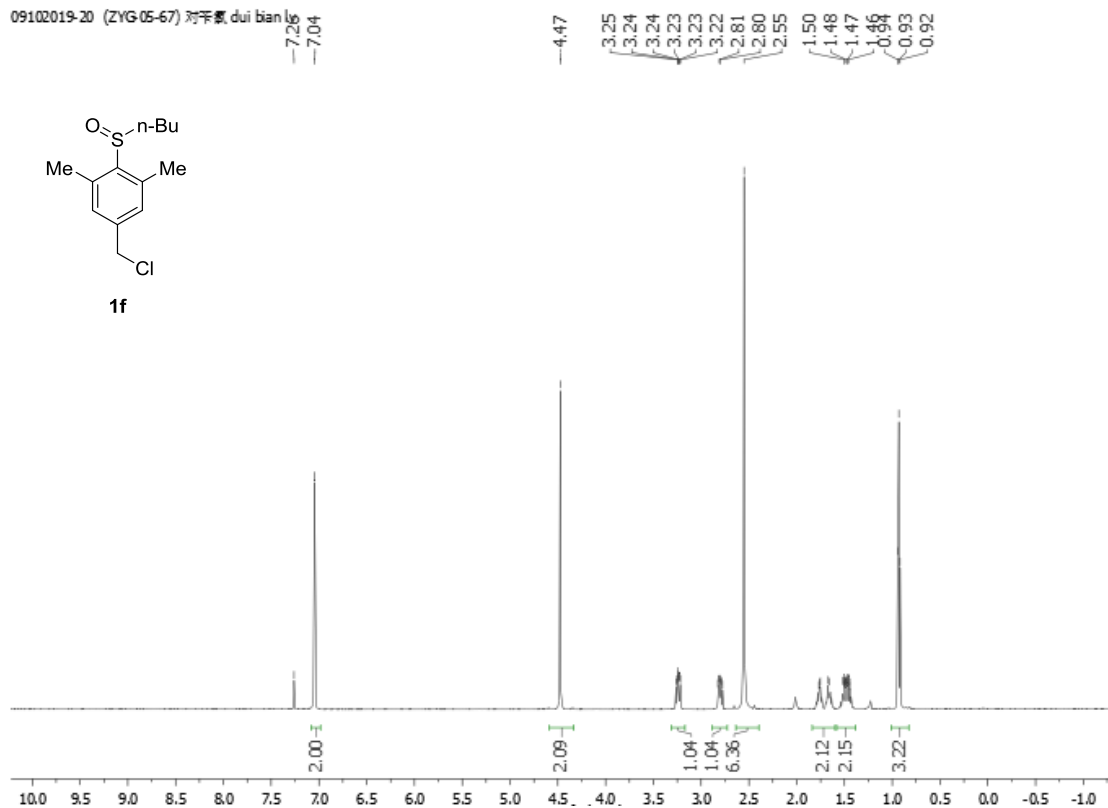

09102019-20 (ZYG-05-67) 对苯基 dui bian lv

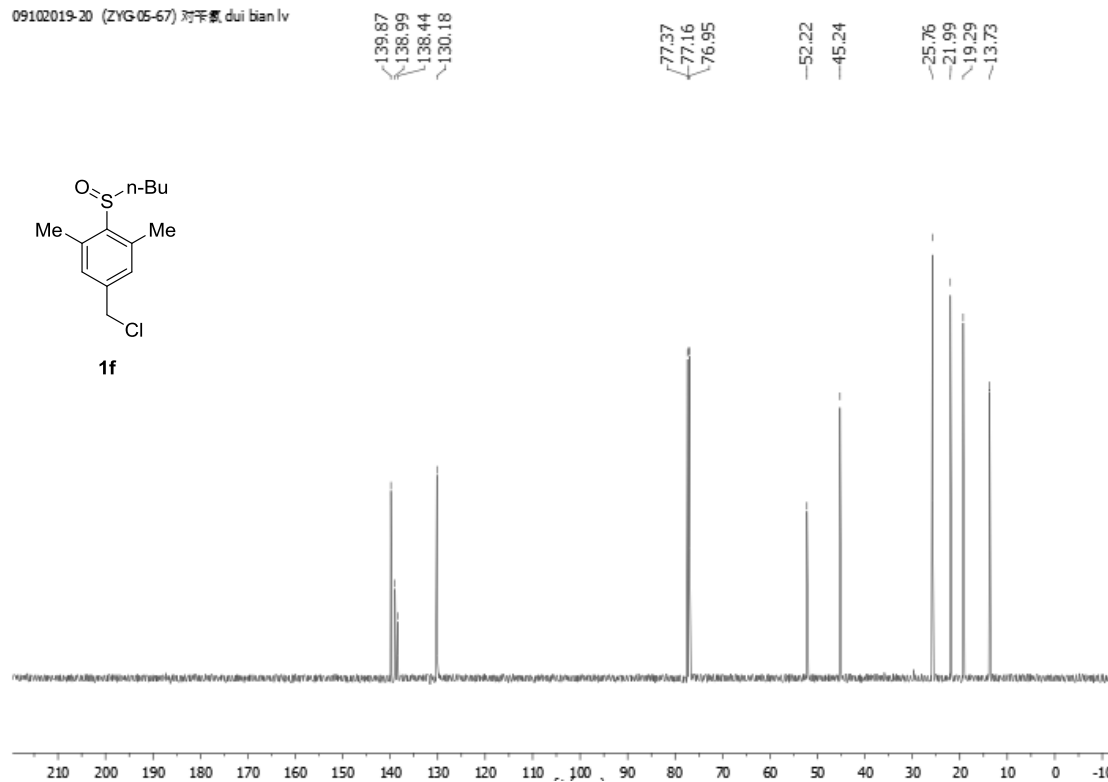

09112019-67 对苯甲醚 dui ban mi

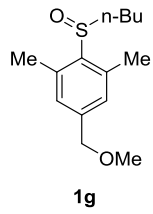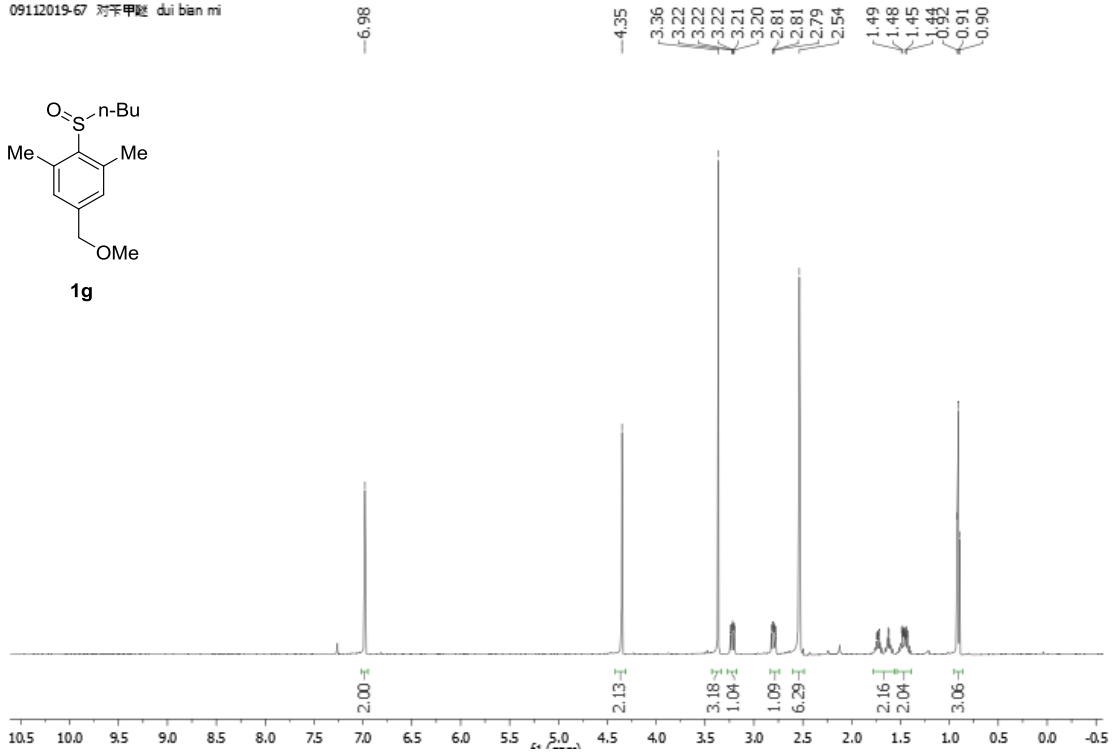

09112019-67 对苯甲醚 dui ban mi

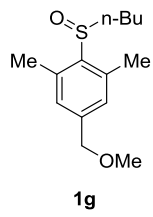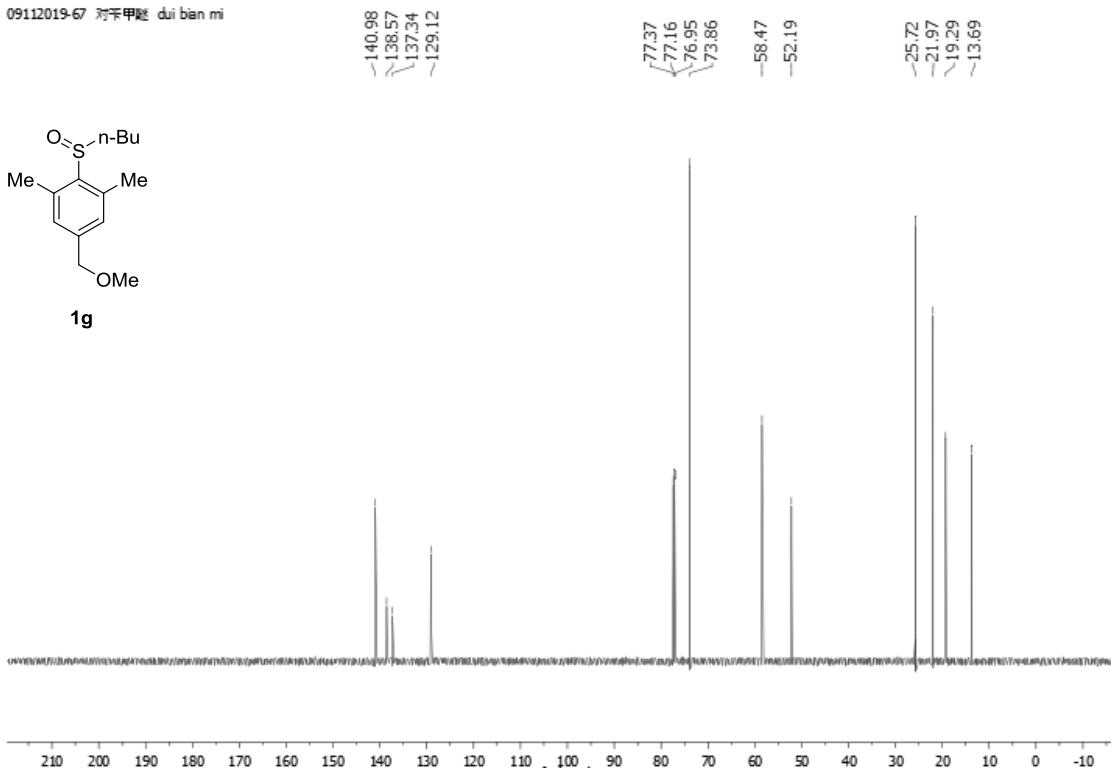

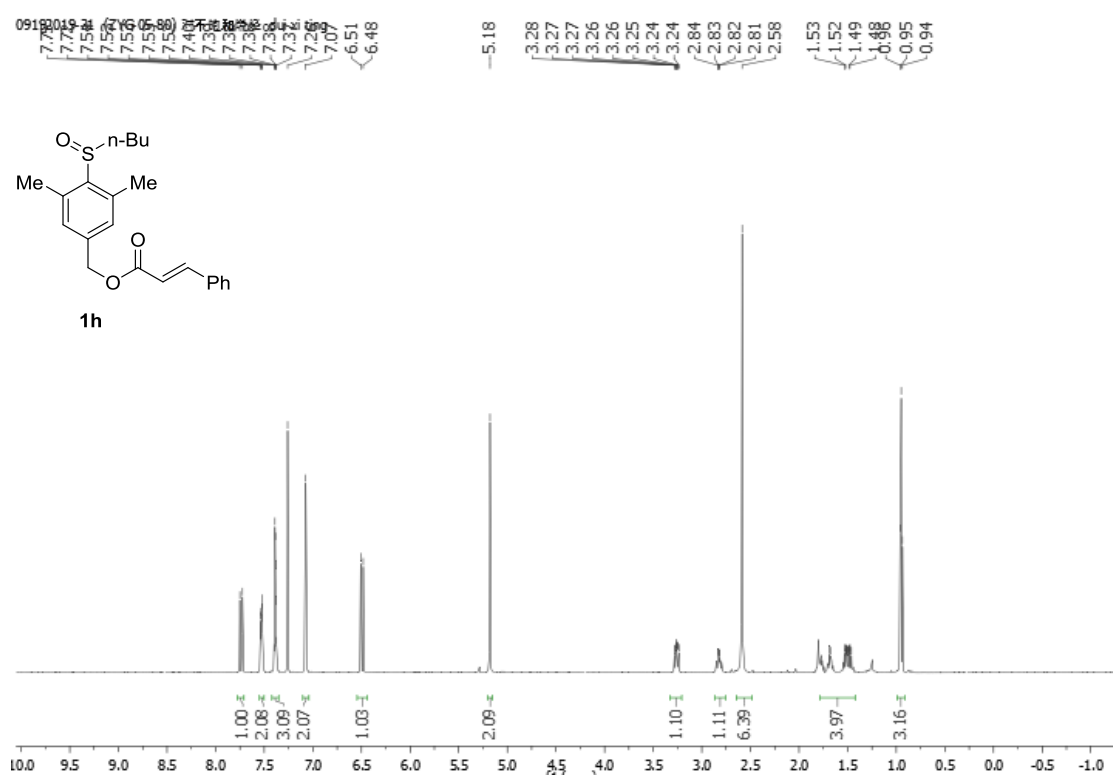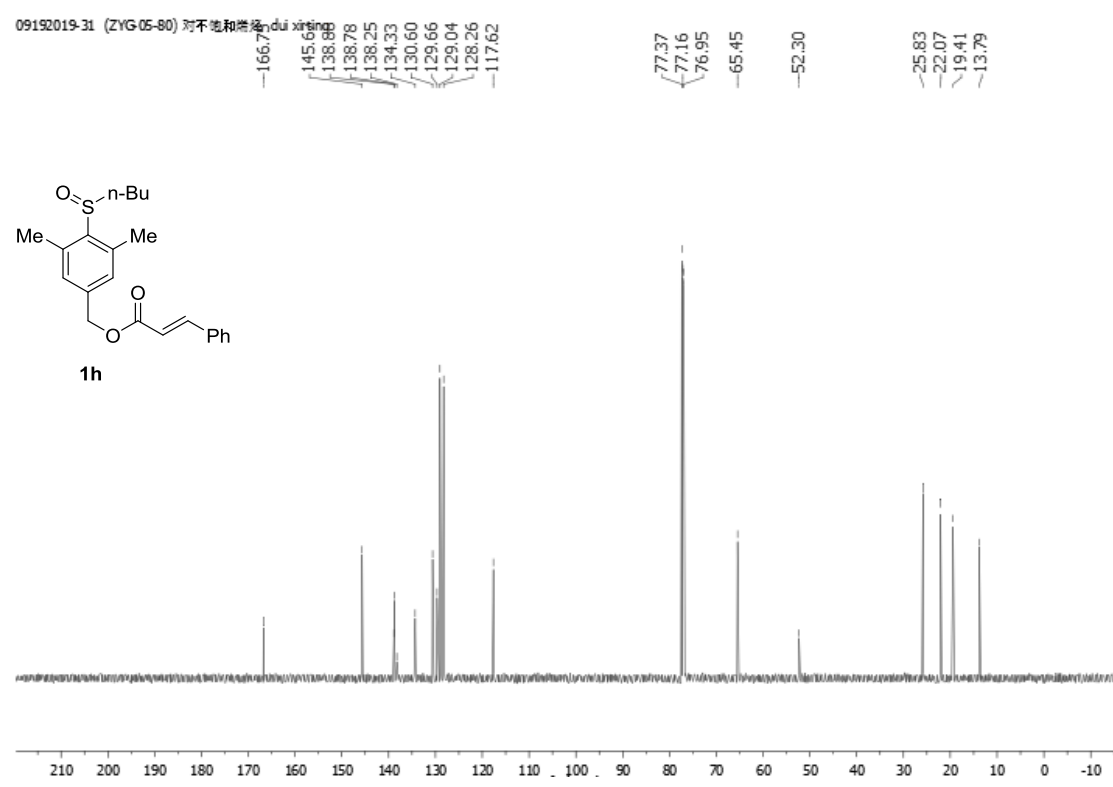

09102019-19 (ZYG-05-66) 对甲硫甲酯 dui-CC2Me

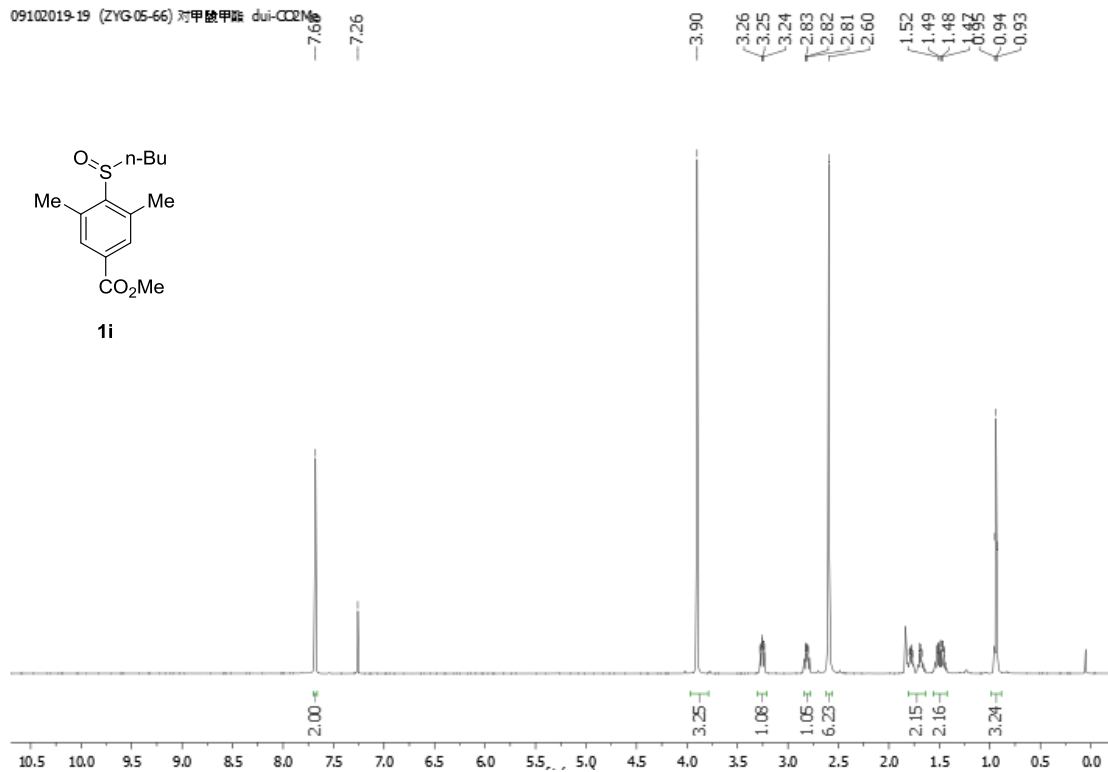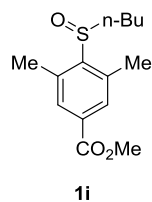

09102019-19 (ZYG-05-66) 对甲硫甲酯 dui-CC2Me

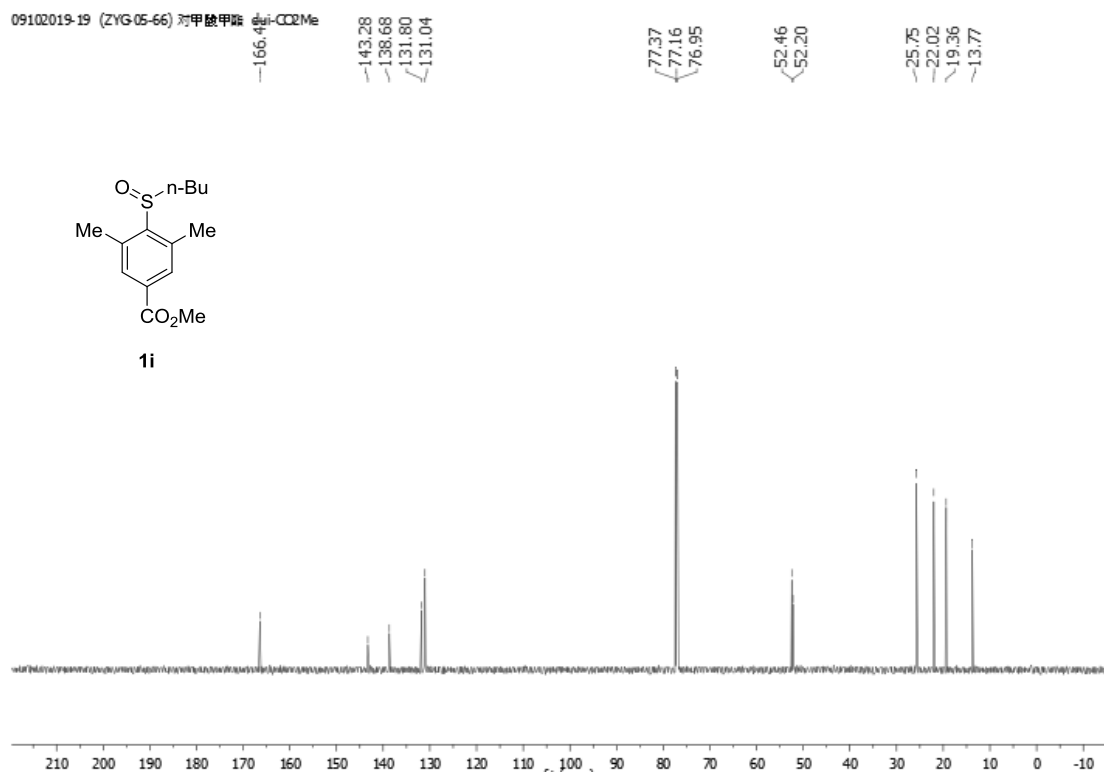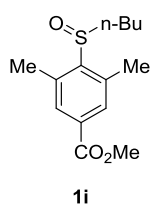

09052019-6 (ZYG-05-61) 对硝基 4-丁基

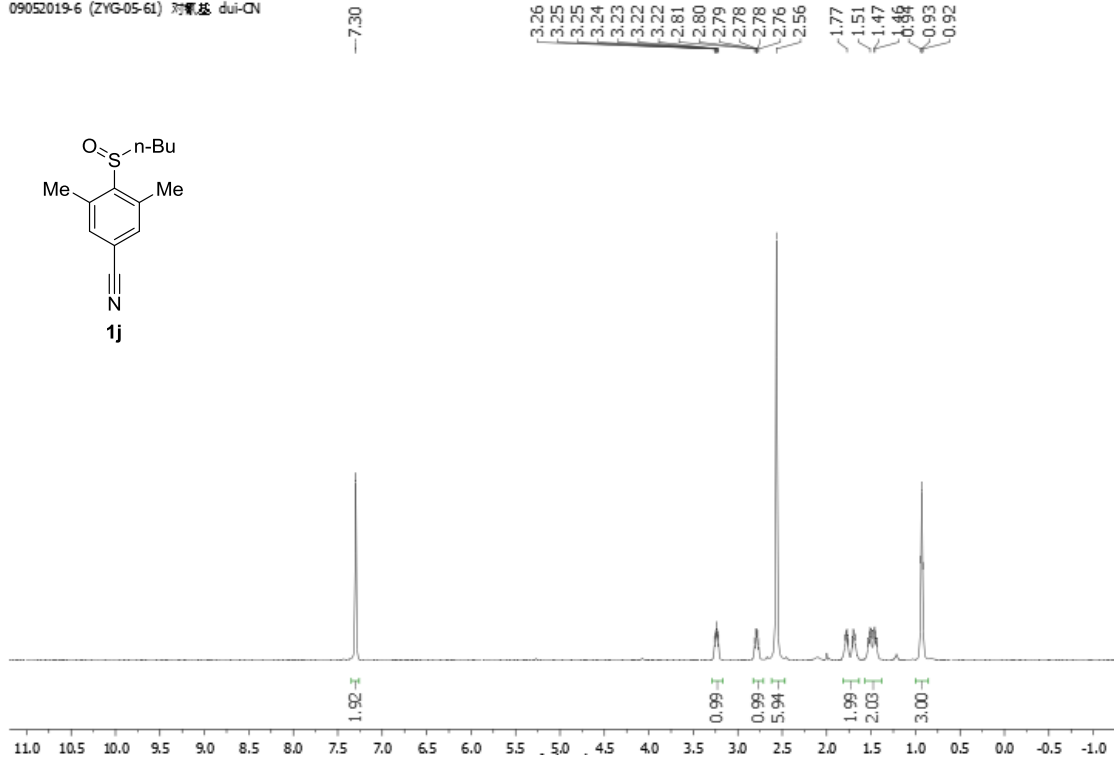

09052019-6 (ZYG-05-61) 对硝基 4-丁基

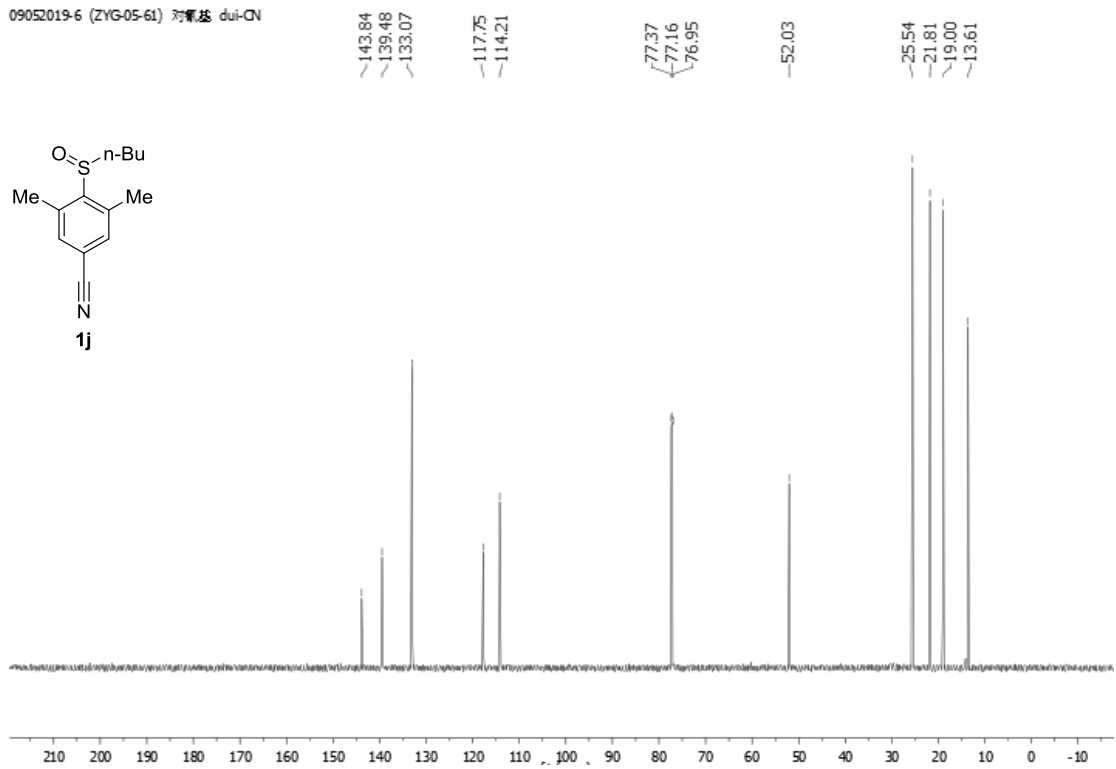



10172019-21 对苯乙炔 dui ben yi que

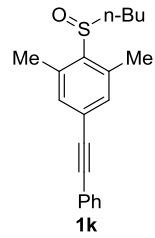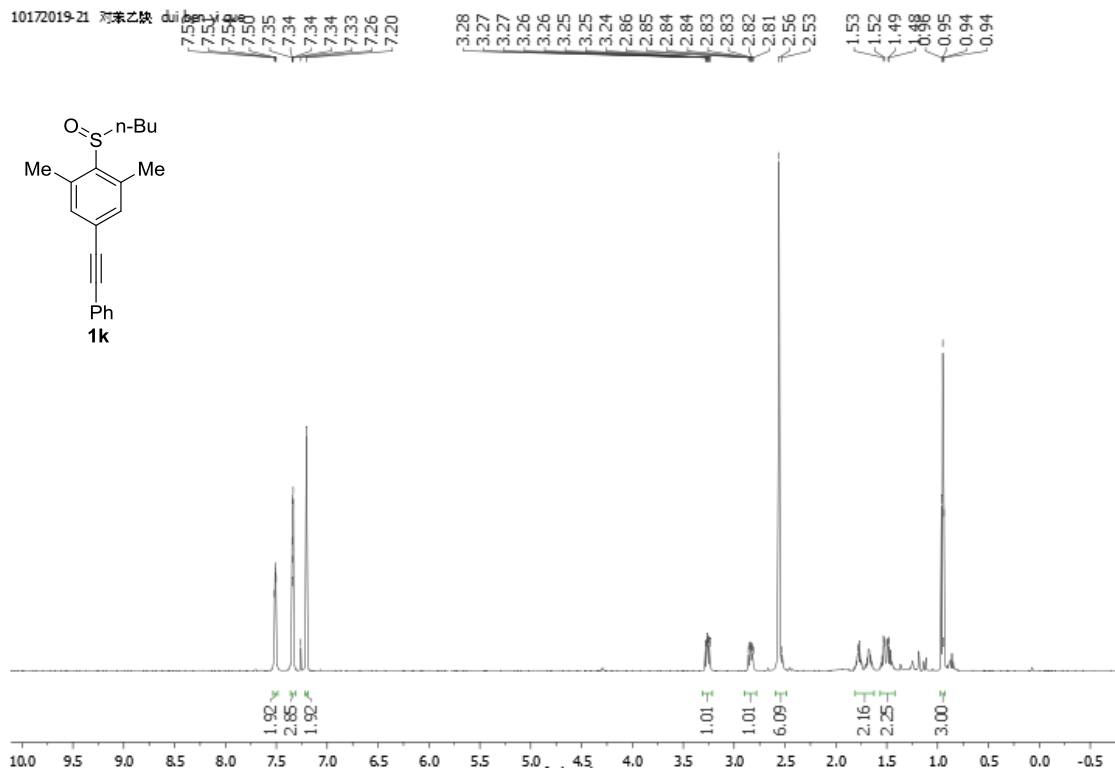

10172019-21 对苯乙炔 dui ben yi que

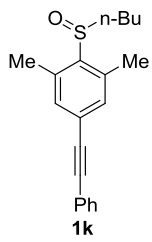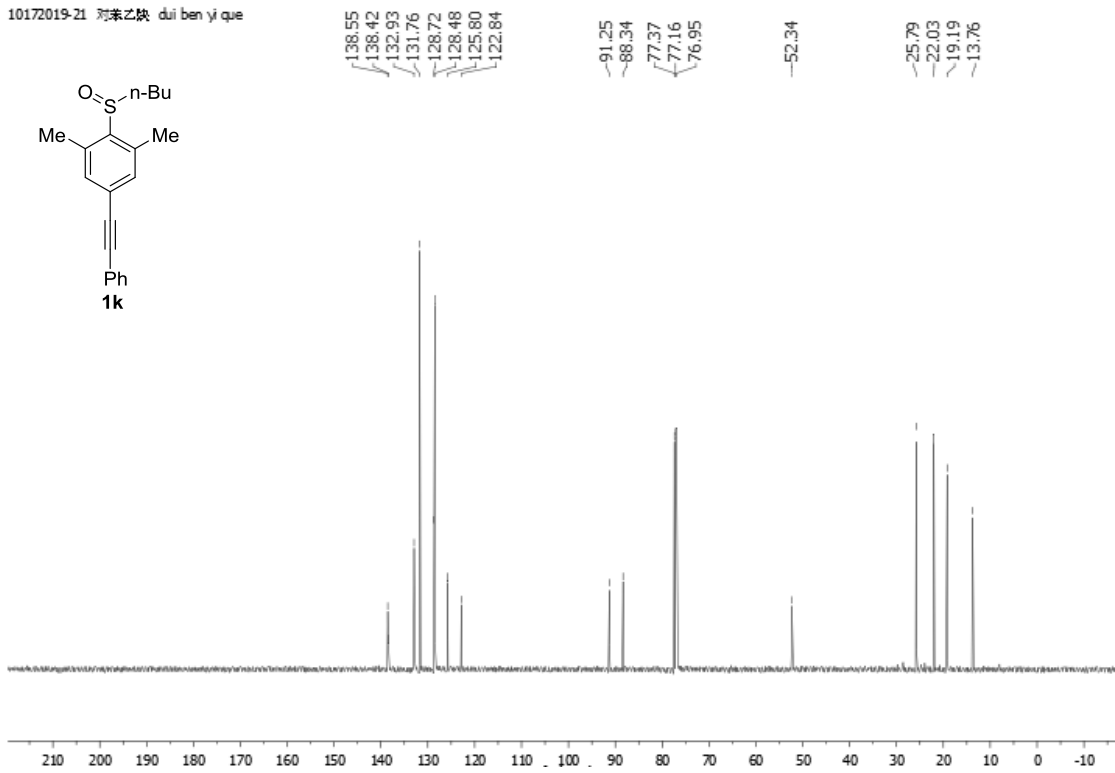

07172019-25 (LWJ-01-8) 对溴 二-Br

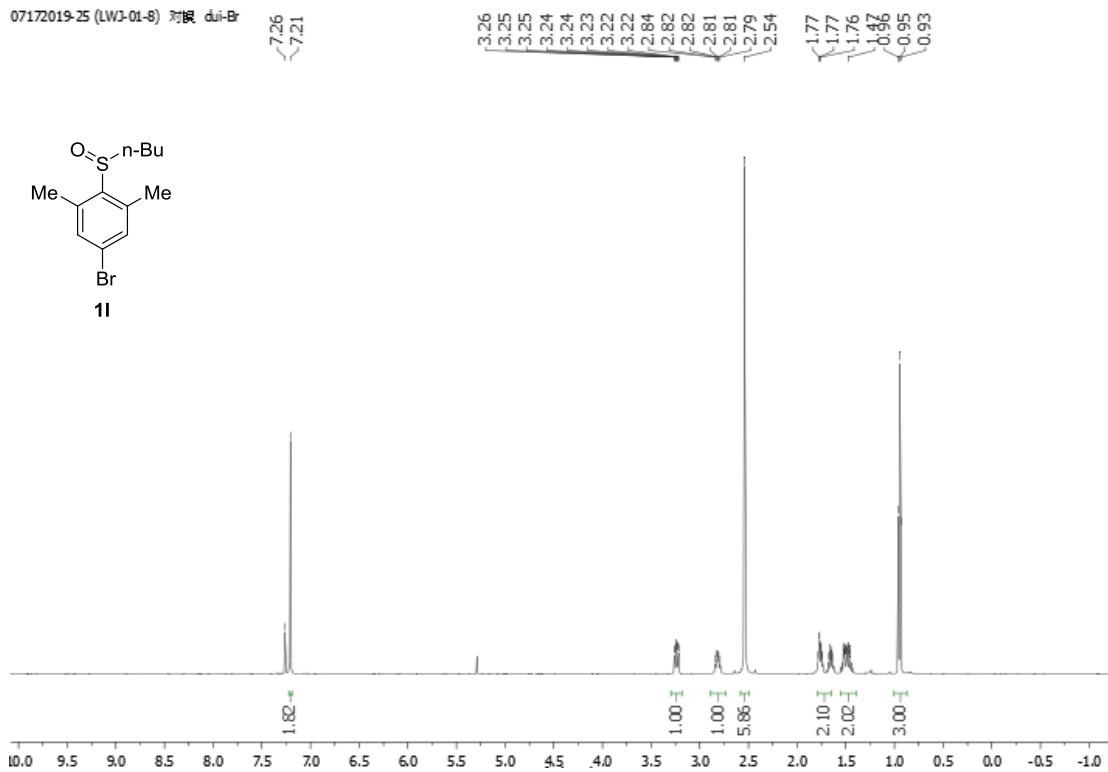

07172019-25 (LWJ-01-8) 对溴 二-Br

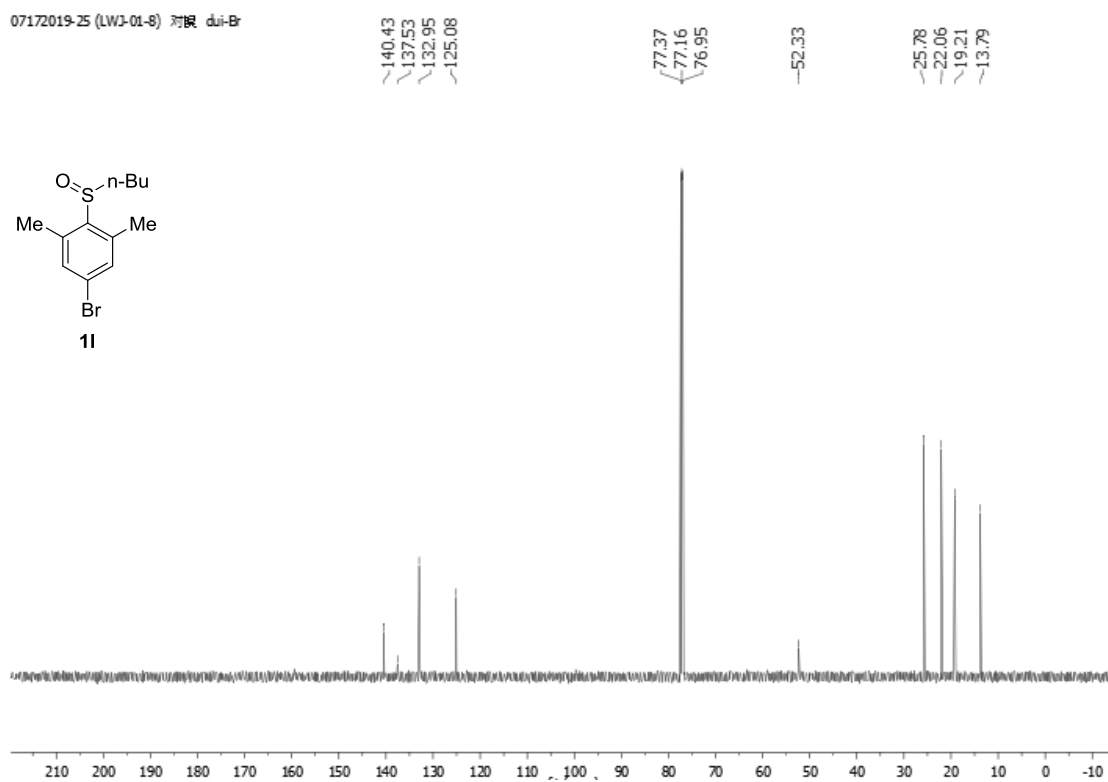

07102019-23 (LW3-1-03) 二乙基

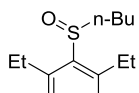

1m

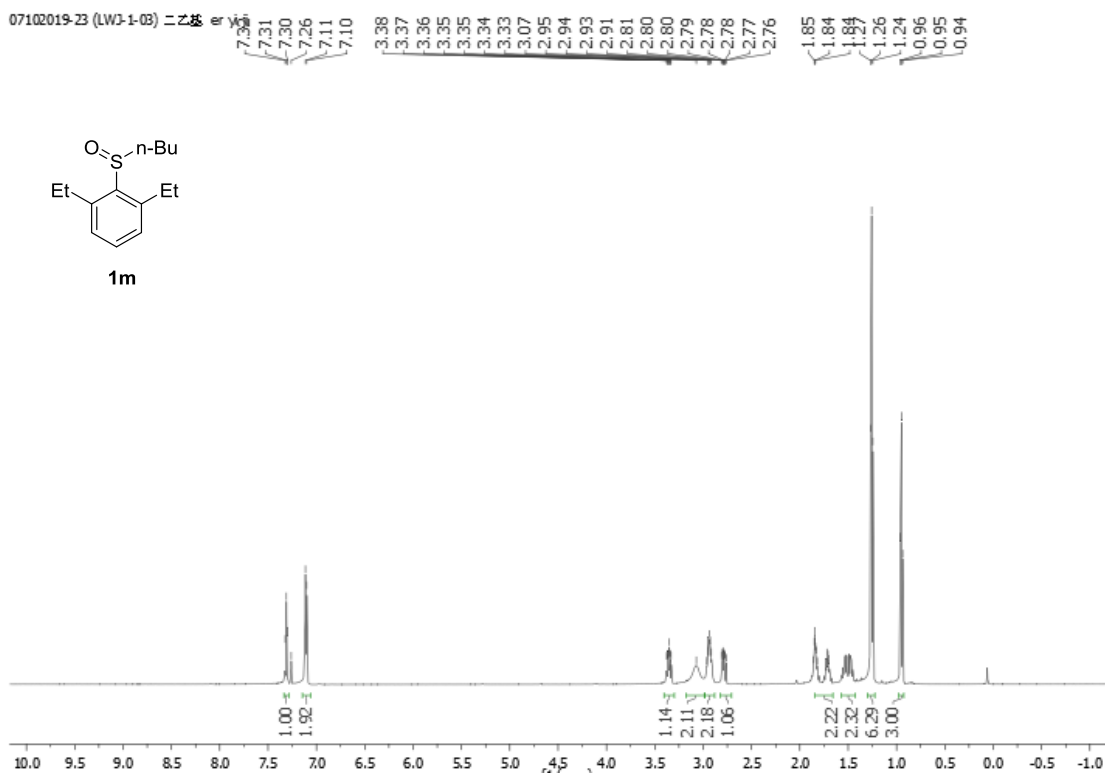

07102019-23 (LW3-1-03) 二乙基

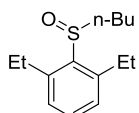

1m

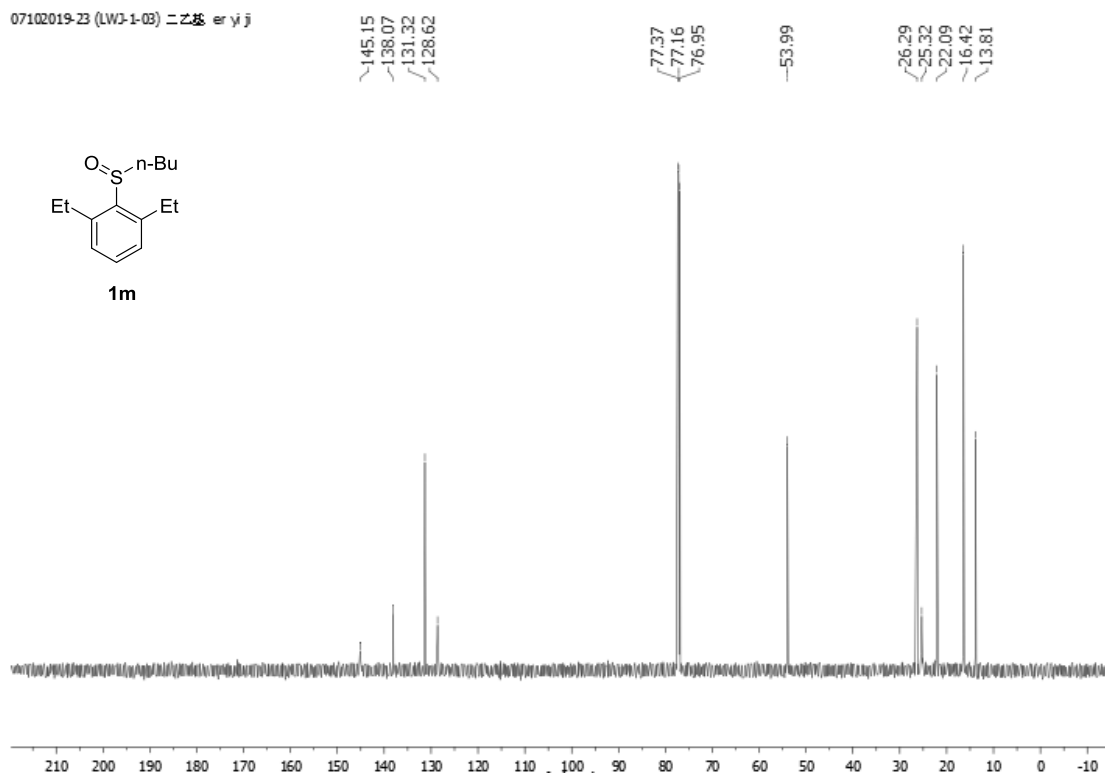

09302019-17

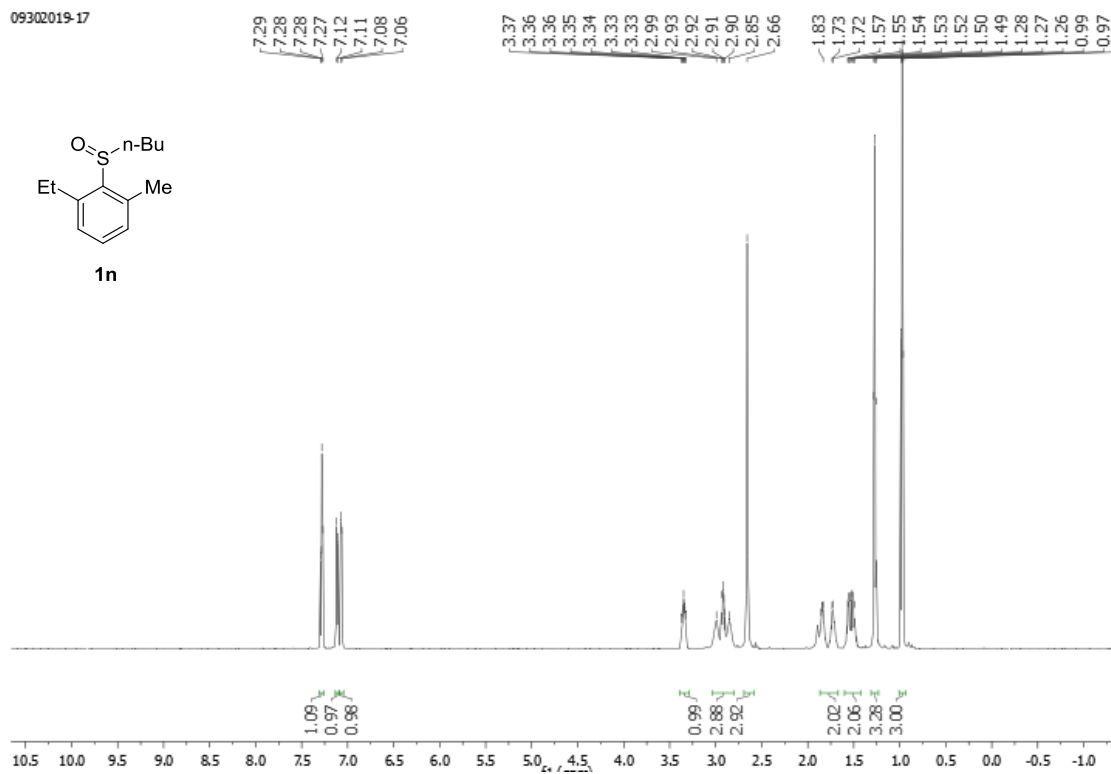

09302019-17

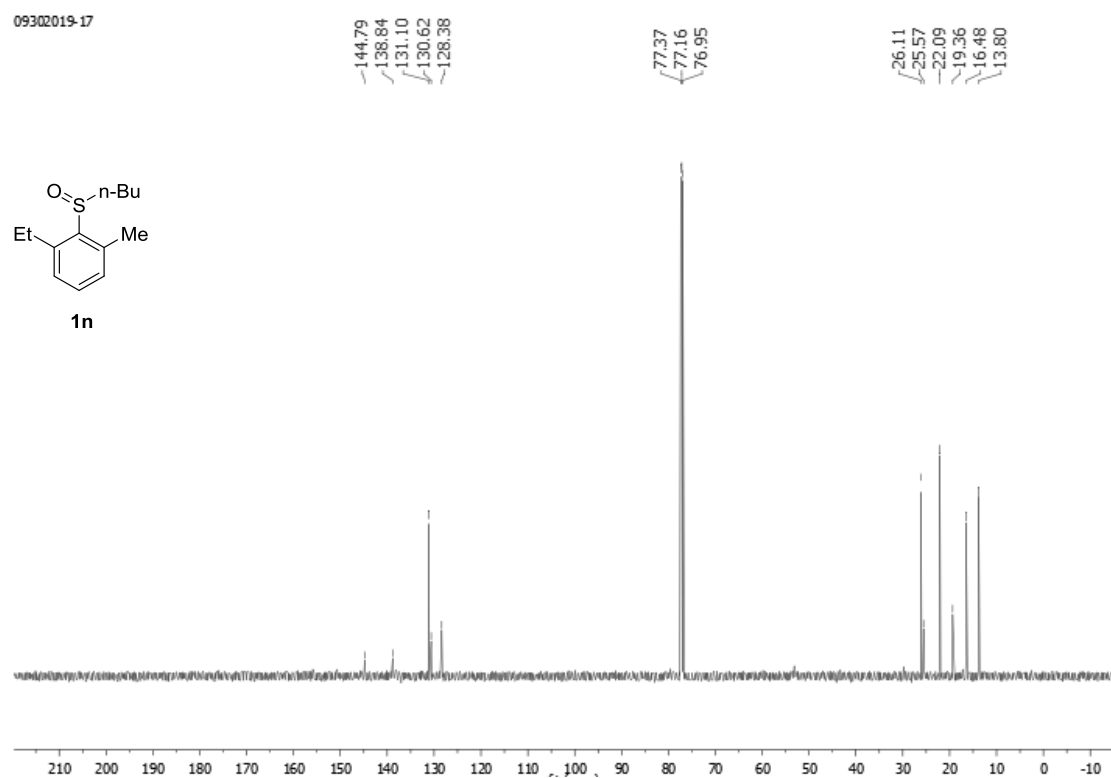

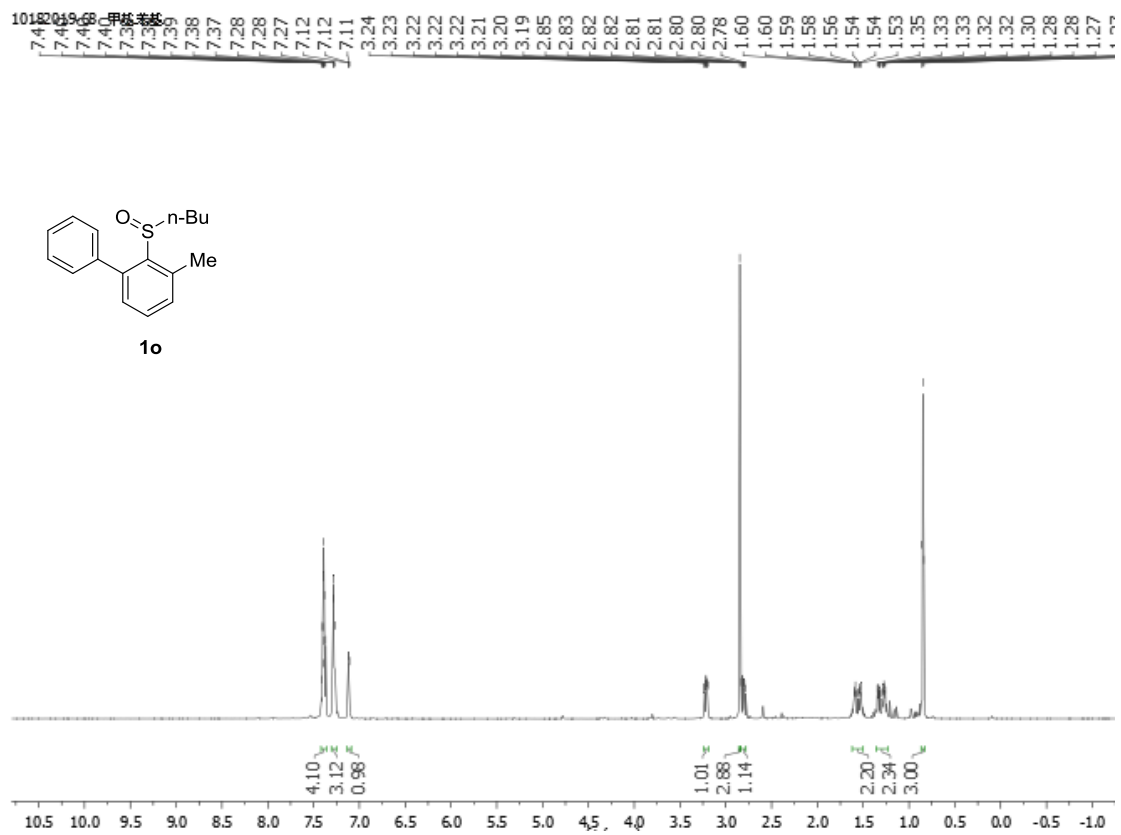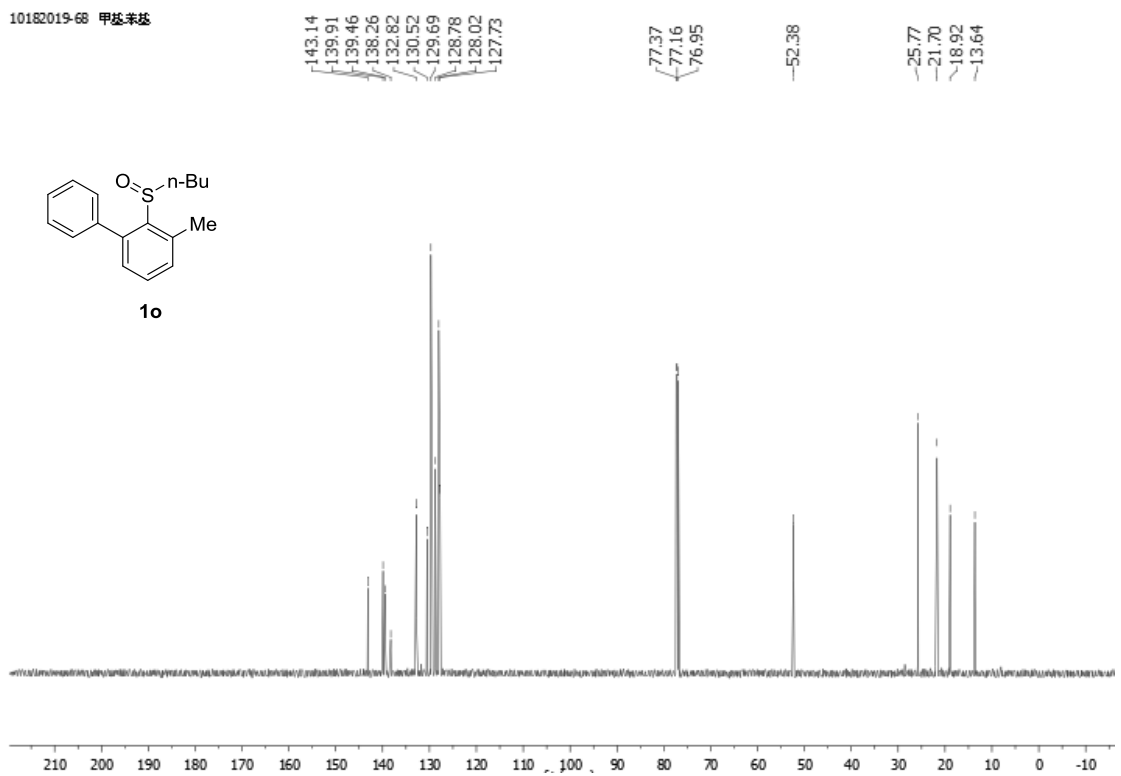

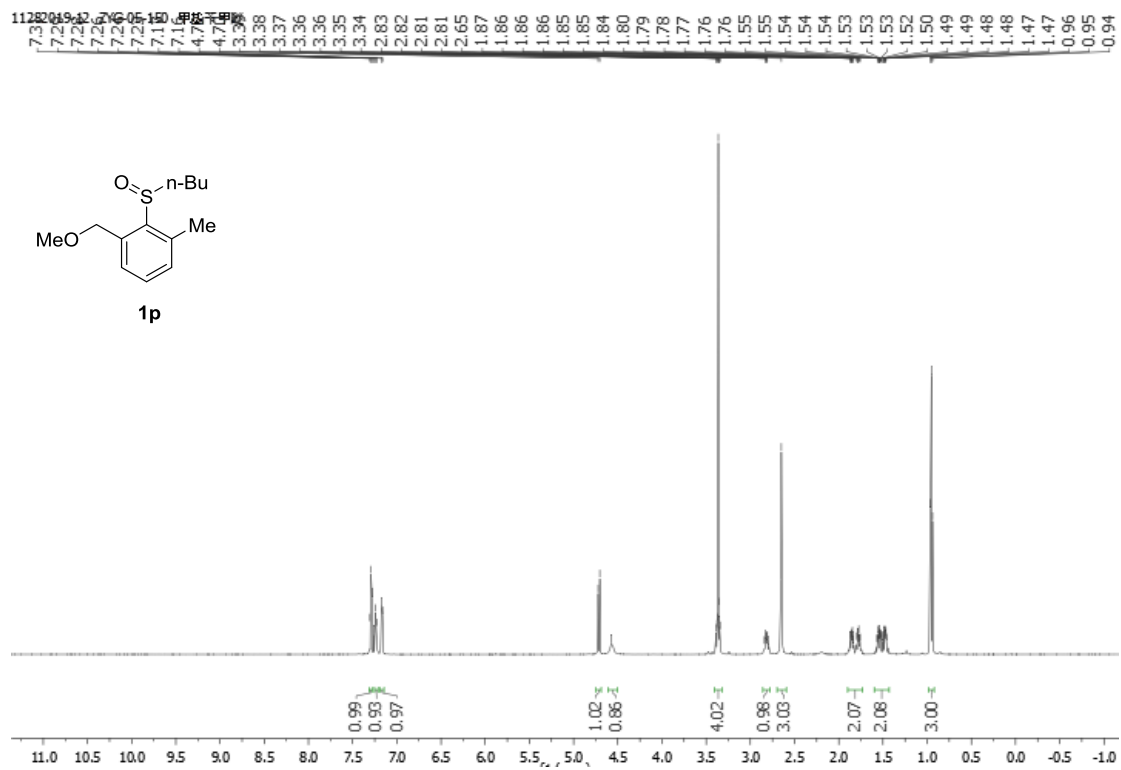

11282019-12 ZYG-05-150 甲基二甲醚

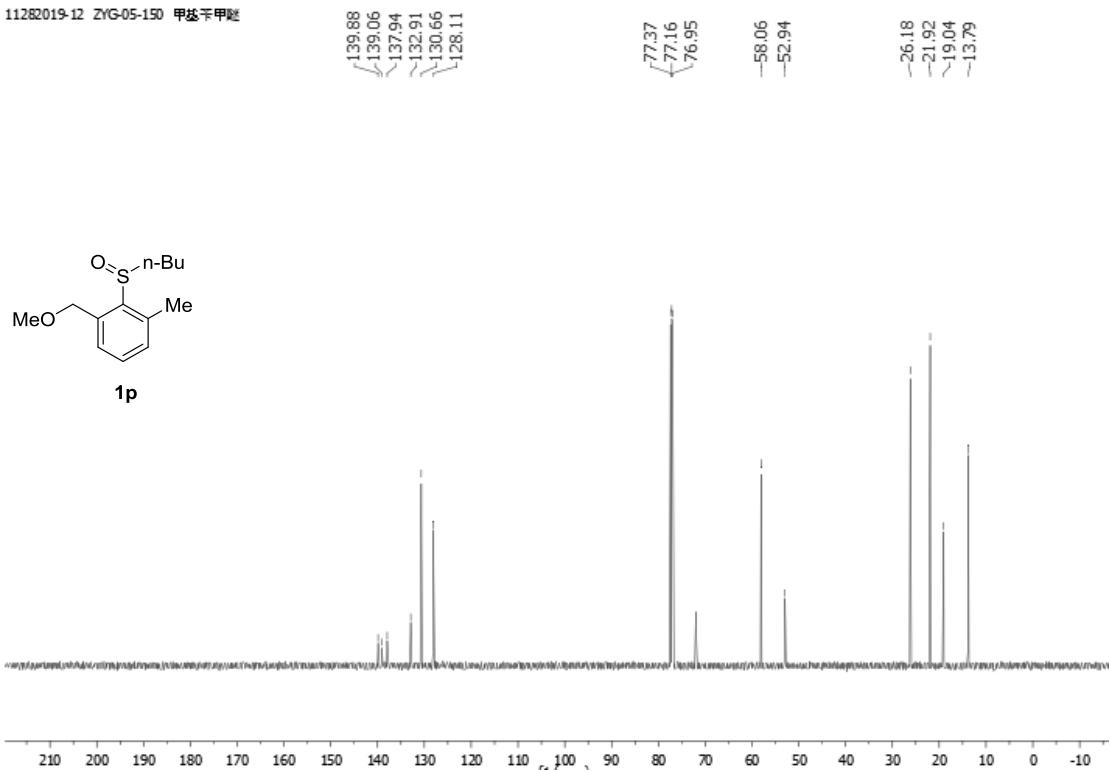

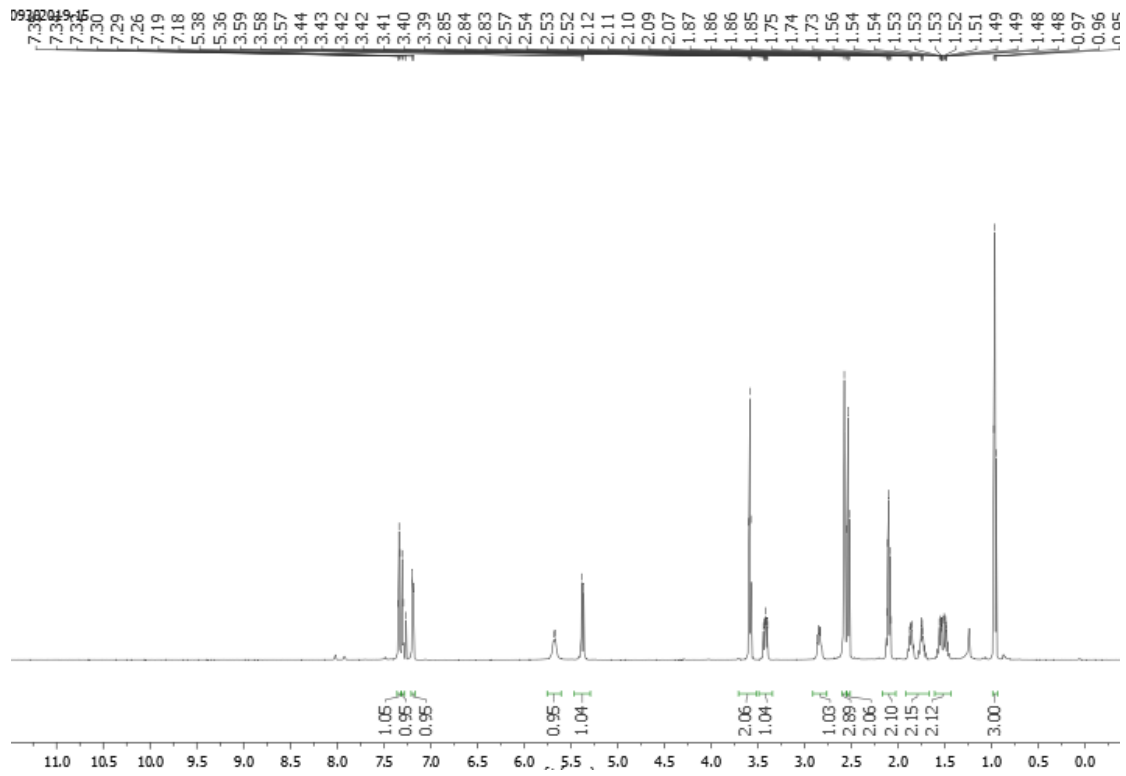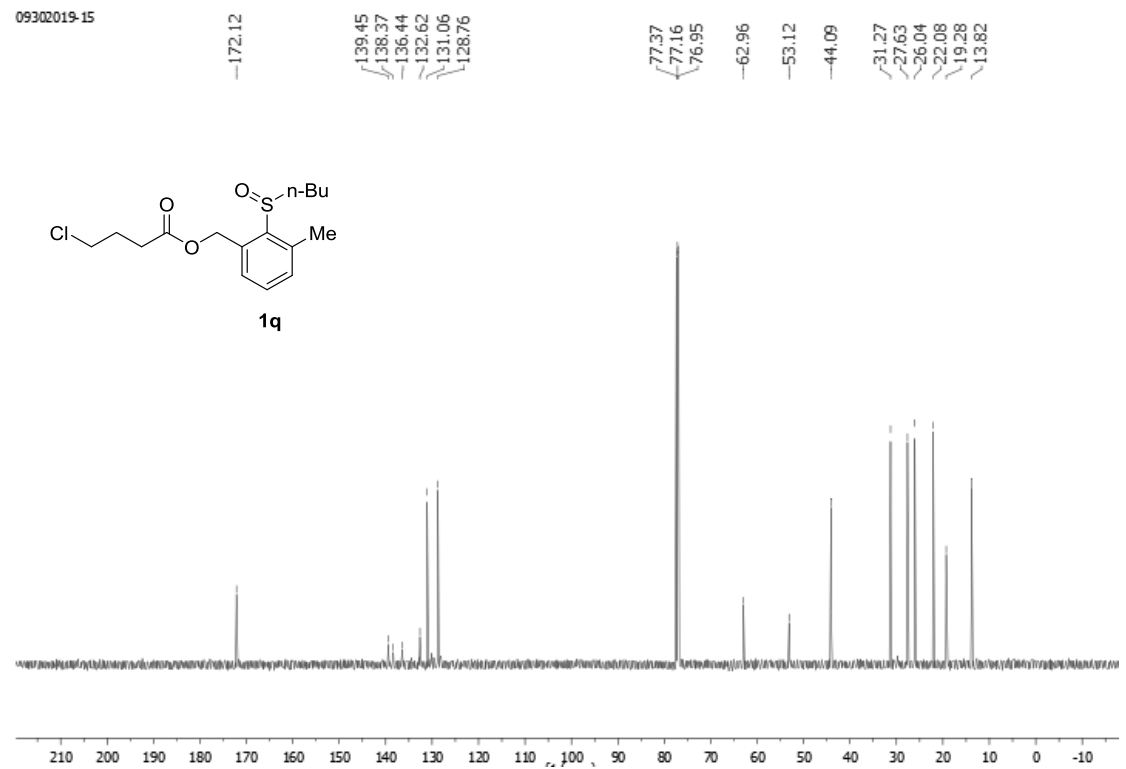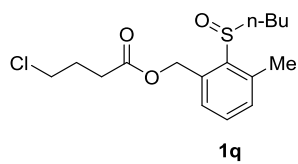

10212019-10 甲基苯胺 jia jixi zhi

7.35  
7.33  
7.32  
7.31  
7.26  
7.20  
7.19  
6.85  
5.78  
5.51  
5.49  
4.25  
4.25  
4.24  
4.23  
4.22  
3.41  
3.39  
3.38  
3.32  
2.56  
1.86  
1.85  
1.84  
1.73  
1.72  
1.30  
1.29  
1.28  
0.96  
0.94  
0.93

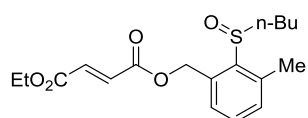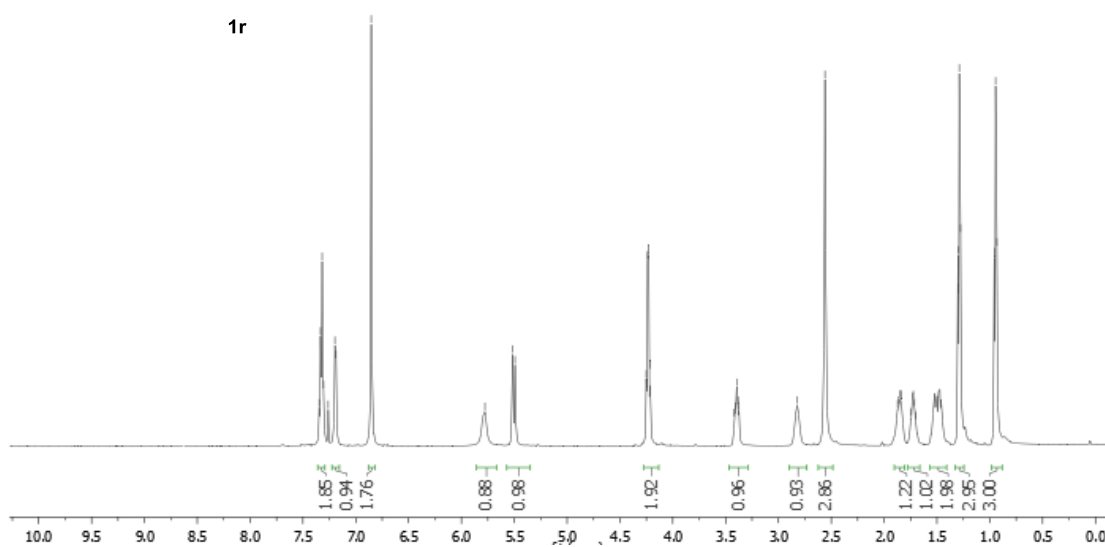

10212019-10 甲基苯胺 jia jixi zhi

164.79  
164.41  
139.59  
138.31  
135.90  
134.43  
133.05  
132.71  
131.06  
128.89  
77.37  
77.16  
76.95  
63.57  
61.50  
53.23  
26.03  
22.03  
19.24  
14.16  
13.77

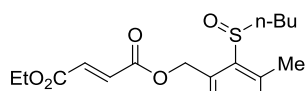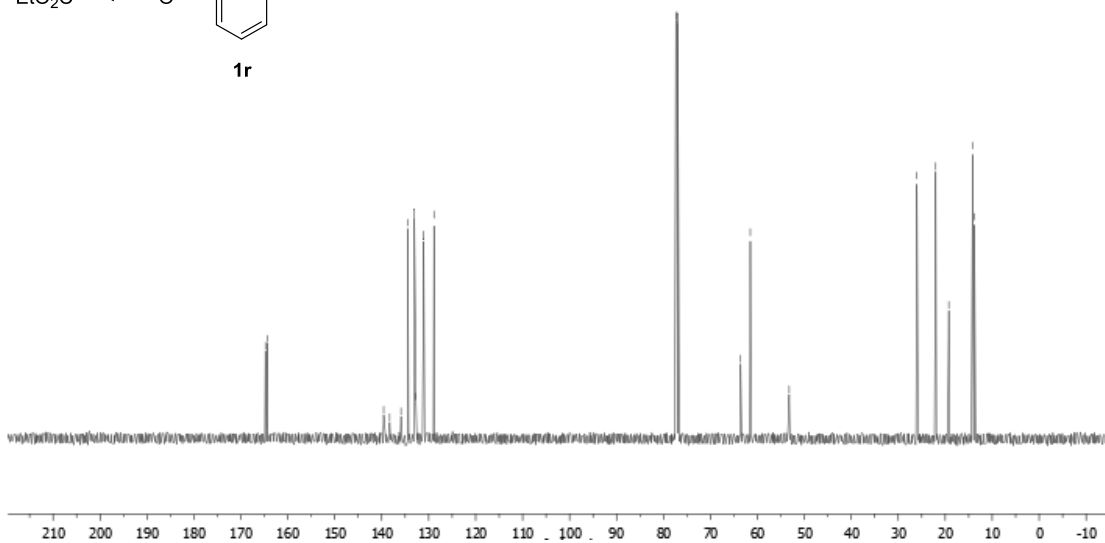



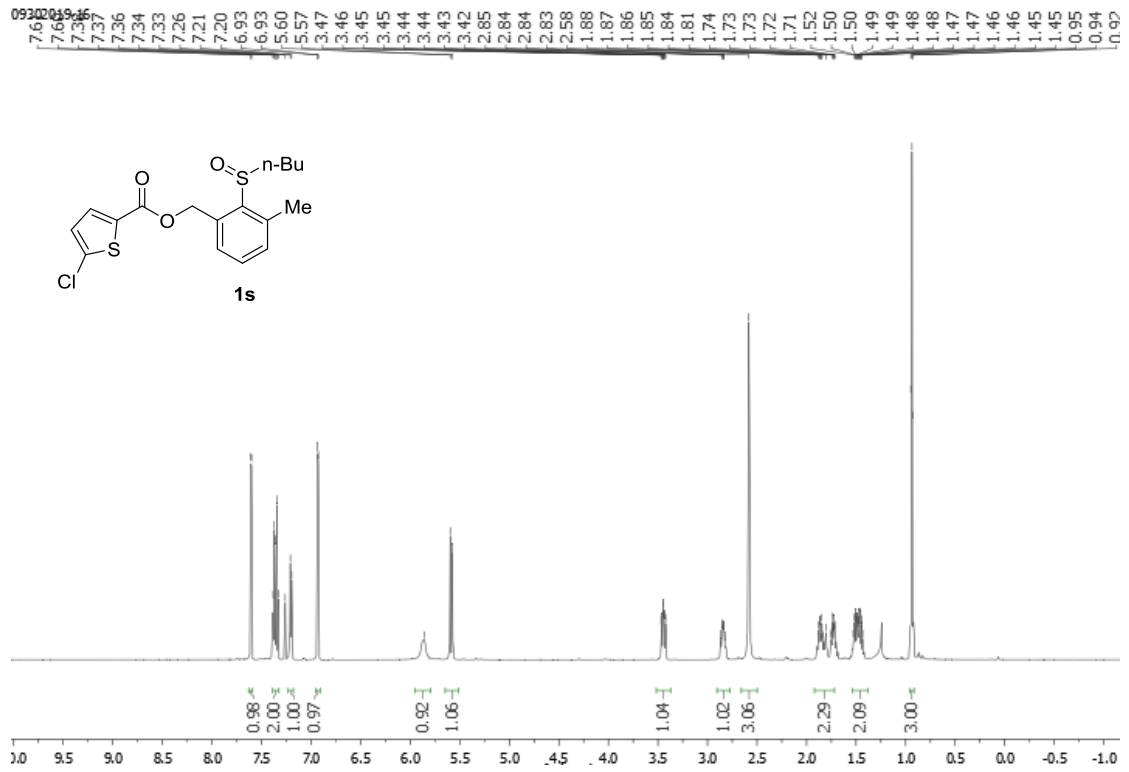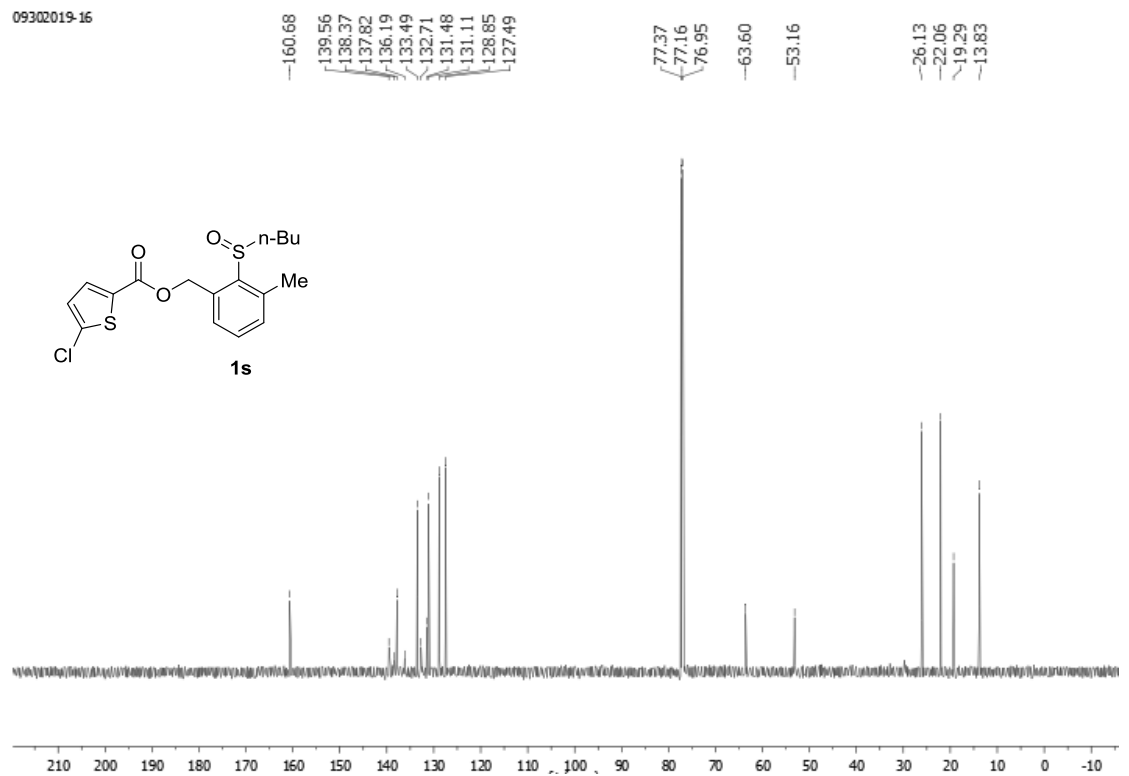



12162019-44 沃糖亚坝

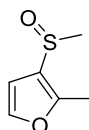

1u

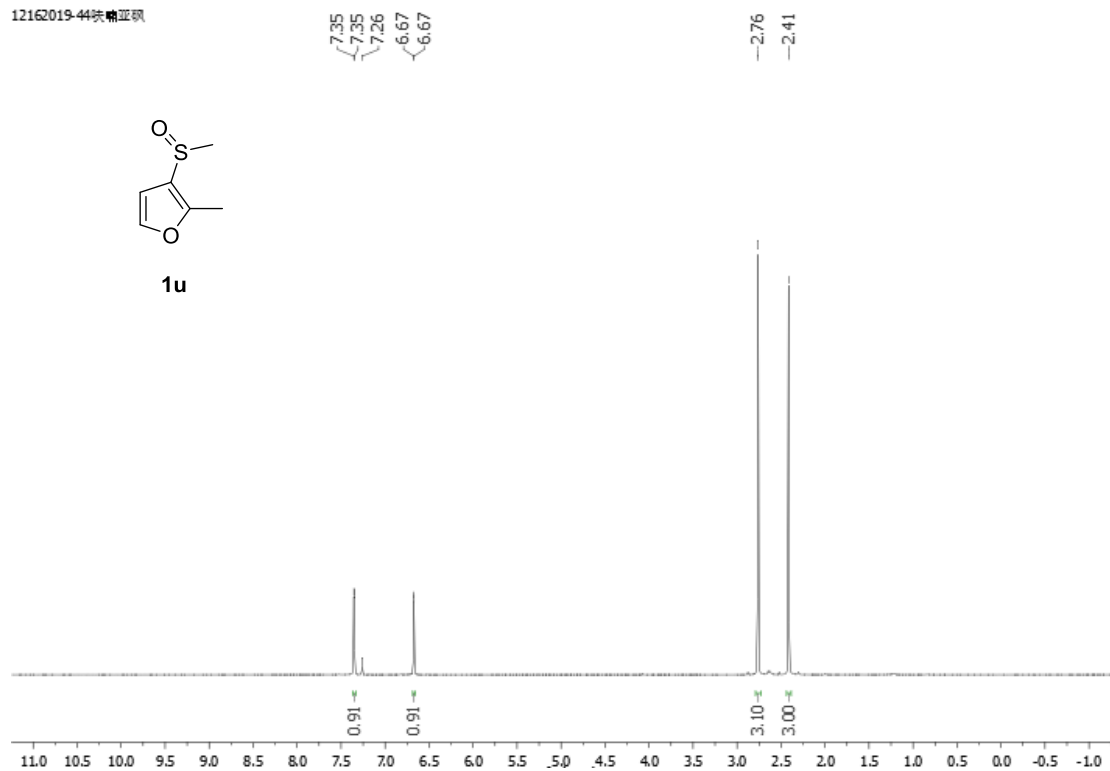

12162019-44 沃糖亚坝

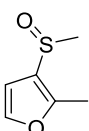

1u

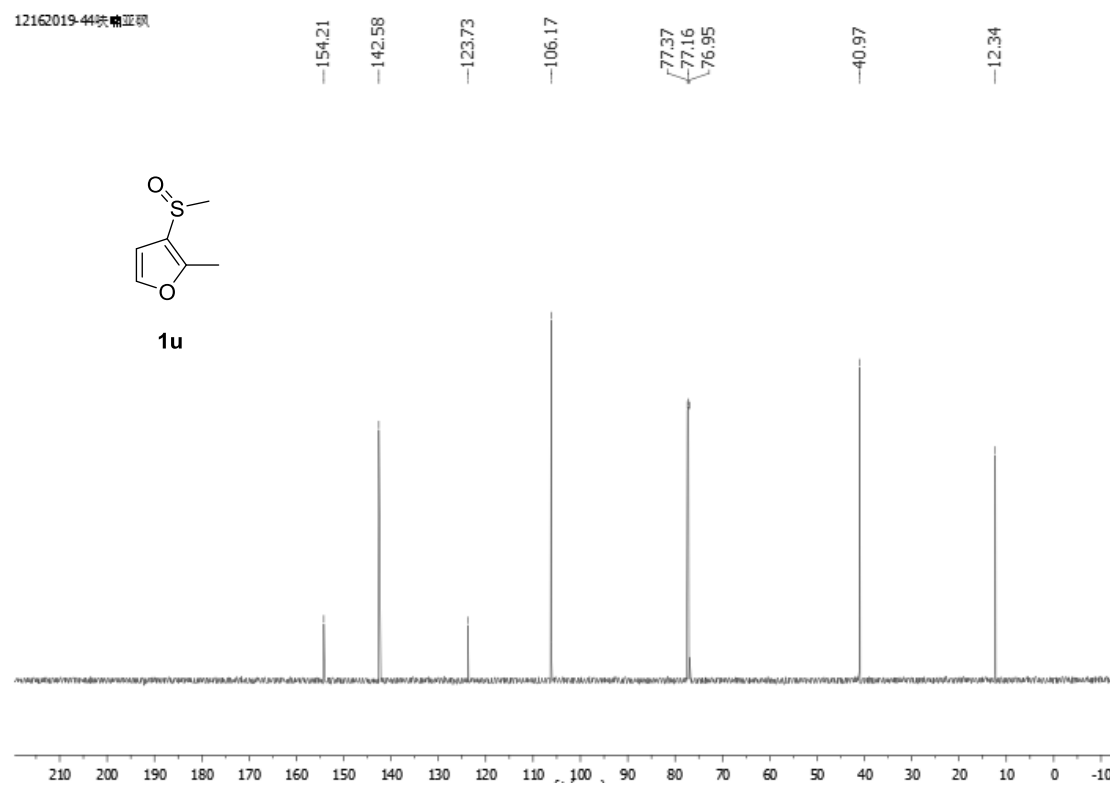

12162019-45 苯亚磺

9.08 7.87 7.86 7.85 7.84 7.59 7.58 7.57 7.53 7.51 7.50 7.29 7.28 3.55 3.54 3.53 3.10 3.08 3.08 3.07 3.06 3.05 2.73 1.52 1.51 1.50 0.99 0.94 0.93

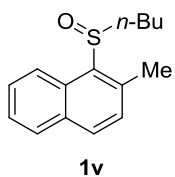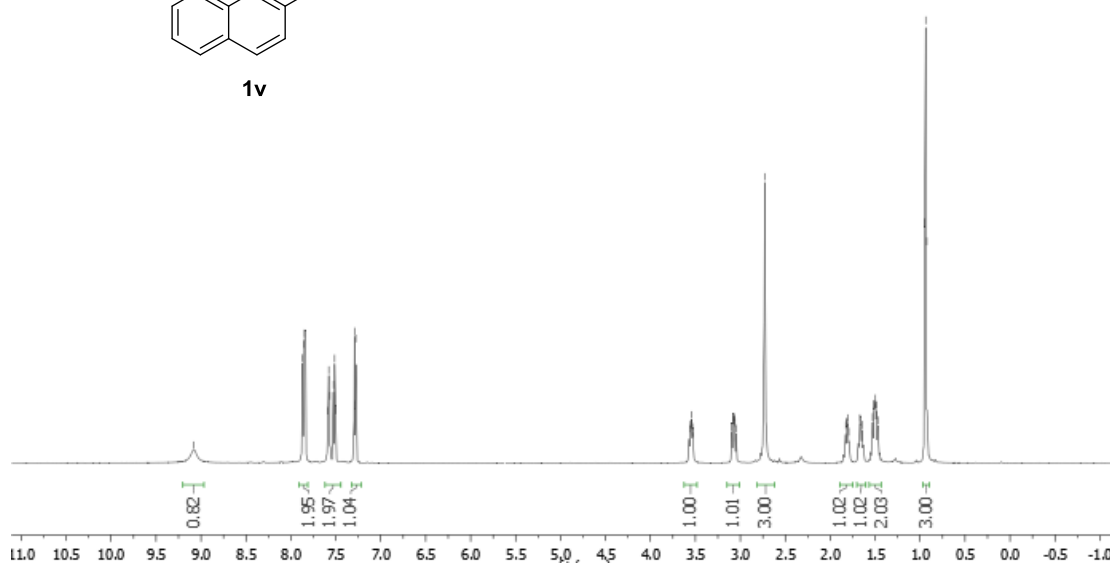

12162019-45 苯亚磺

137.36 134.24 133.25 131.90 131.15 129.29 129.04 127.30 126.00 123.57 77.37 77.16 76.95 52.77 25.91 22.04 19.96 13.76

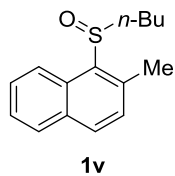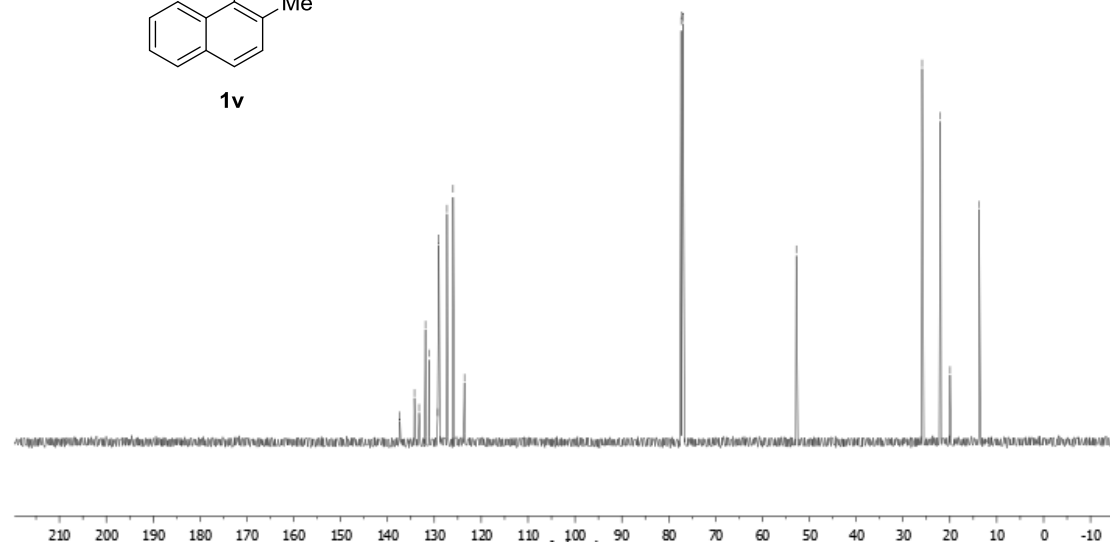

11192019-6 杂质

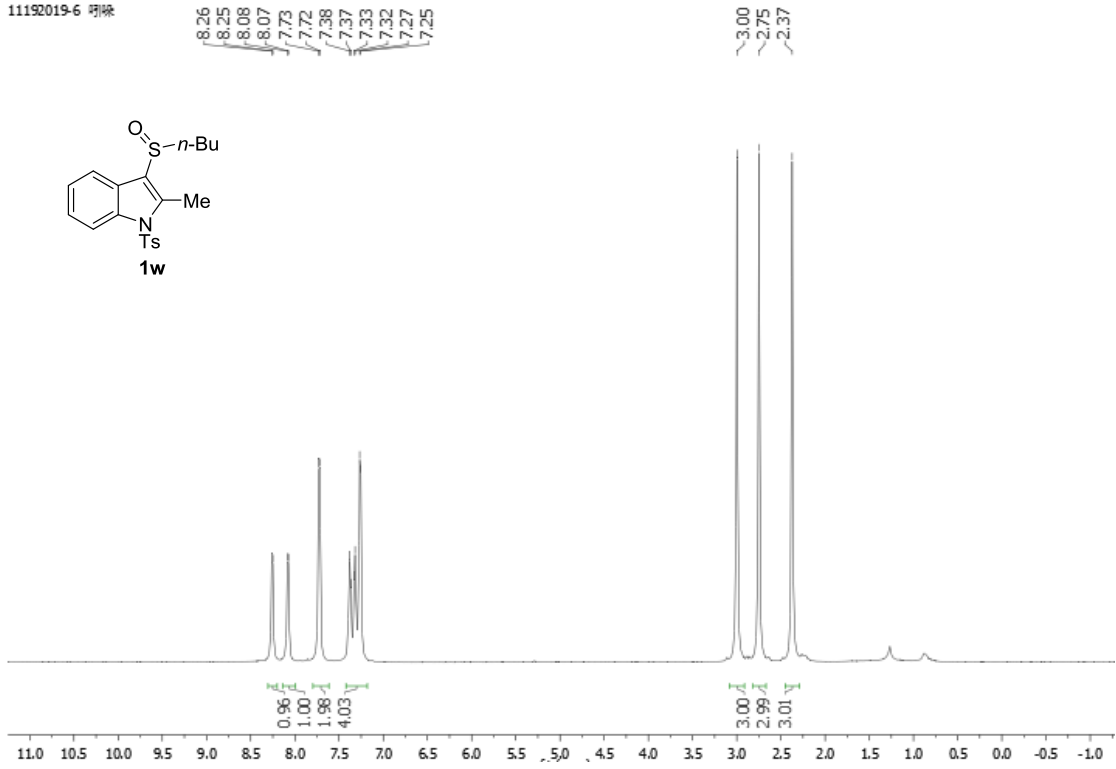

11192019-6 杂质

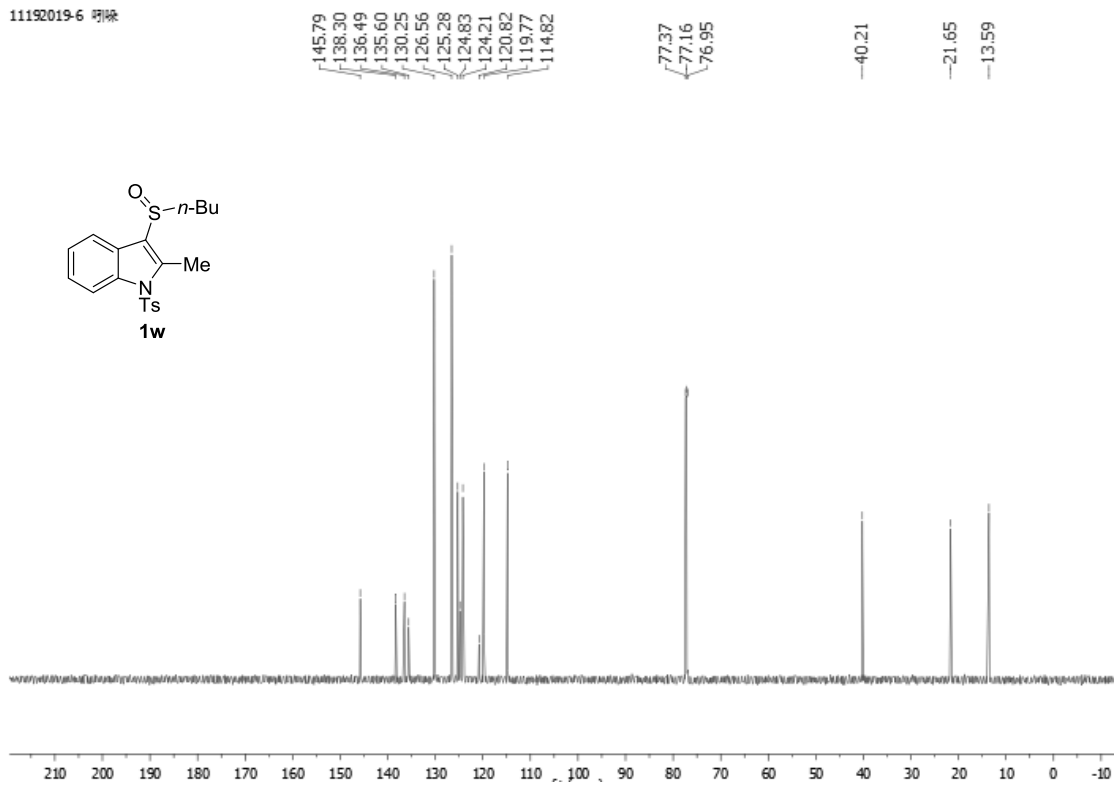

12192019-24 甲硫基中间体

7.63  
7.63  
7.62  
7.39  
7.38  
7.38  
7.38  
7.26  
6.05  
6.03  
5.89  
5.88  
5.87  
5.87  
4.72  
4.71  
-3.22  
2.15  
2.11  
1.59  
1.58

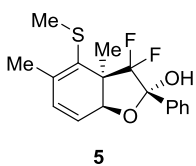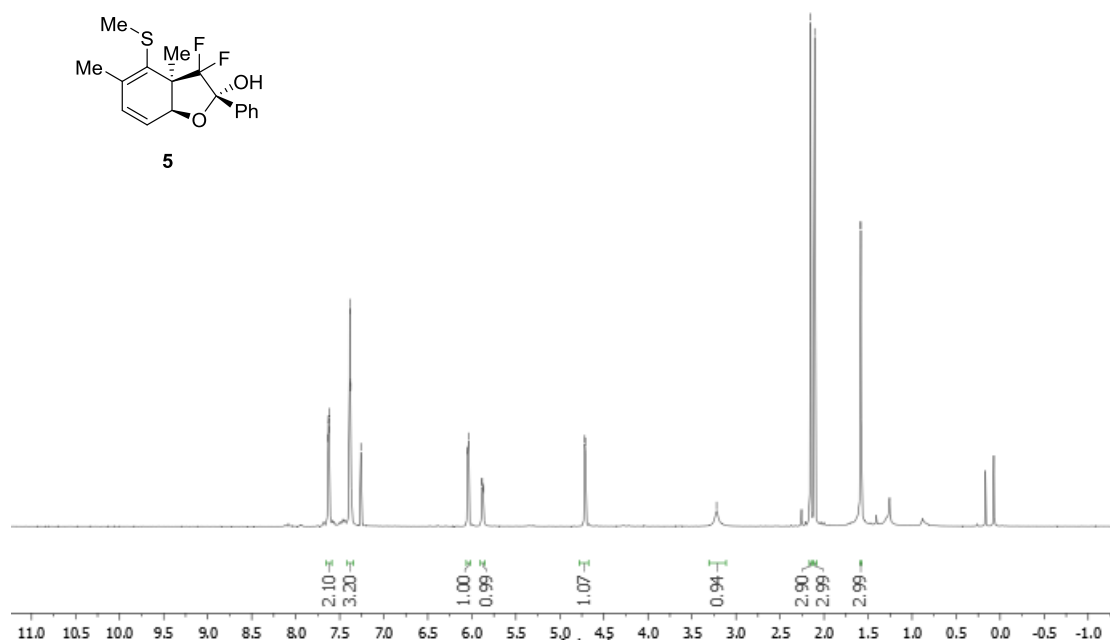

12192019-24 甲硫基中间体

136.80  
135.47  
131.06  
129.94  
129.52  
128.26  
127.56  
126.93  
125.89  
124.05  
121.82  
98.66  
98.50  
98.42  
98.26  
79.69  
79.66  
77.37  
77.16  
76.95  
50.14  
50.01  
49.87  
23.70  
21.05  
18.78

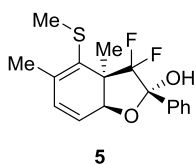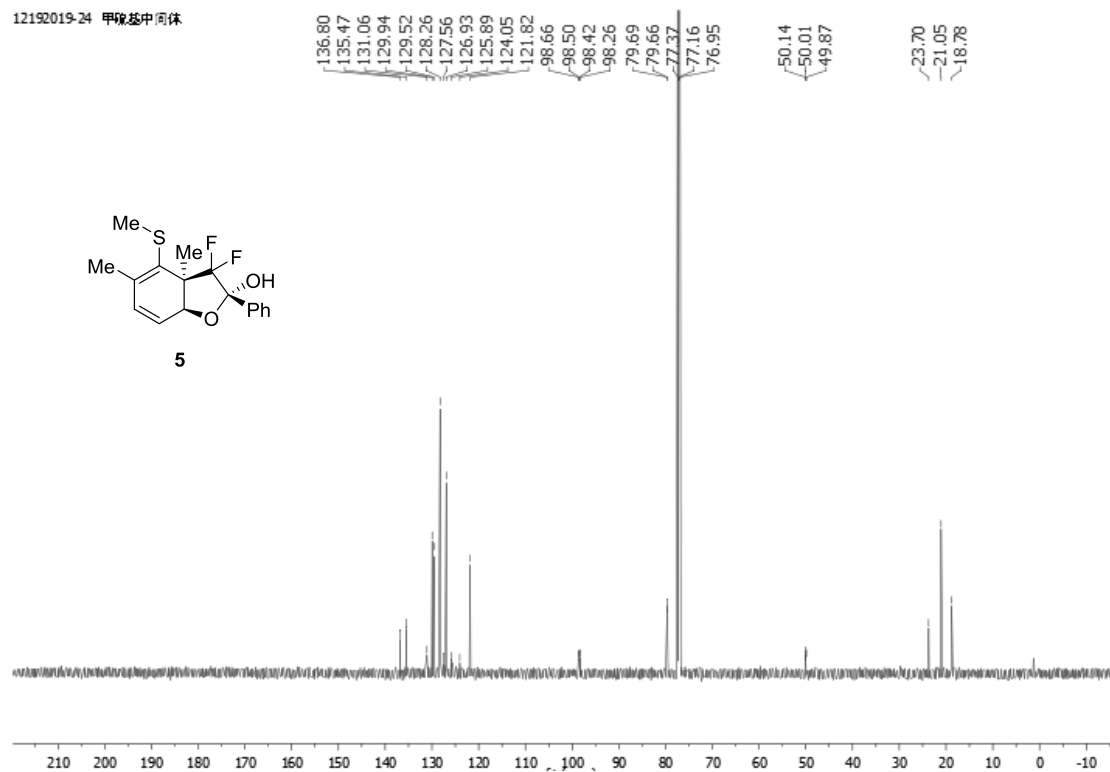

12192019-24 甲硫基中间体

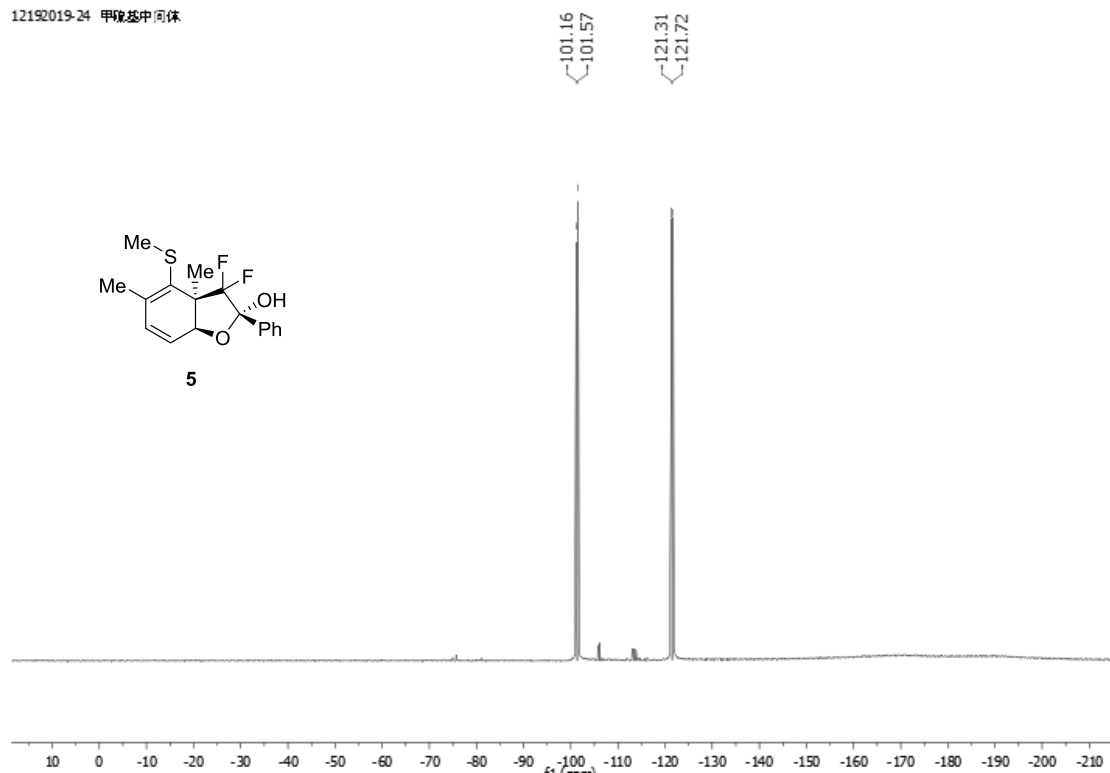

10252019-19 (查)

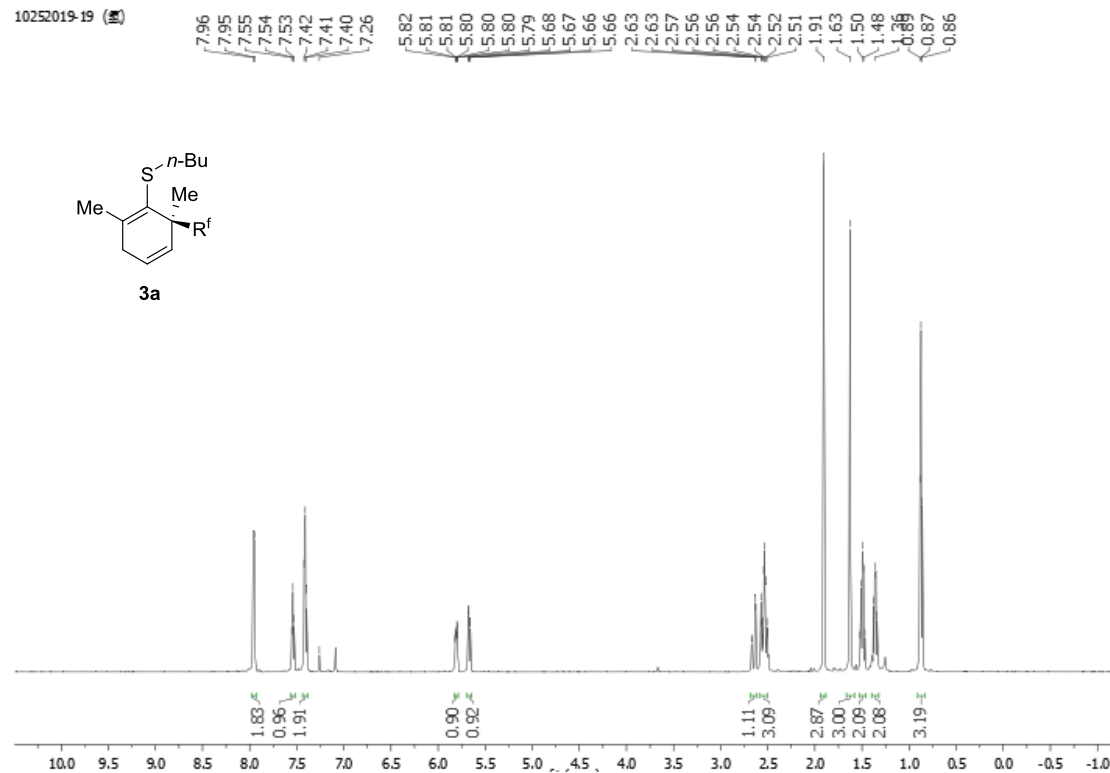

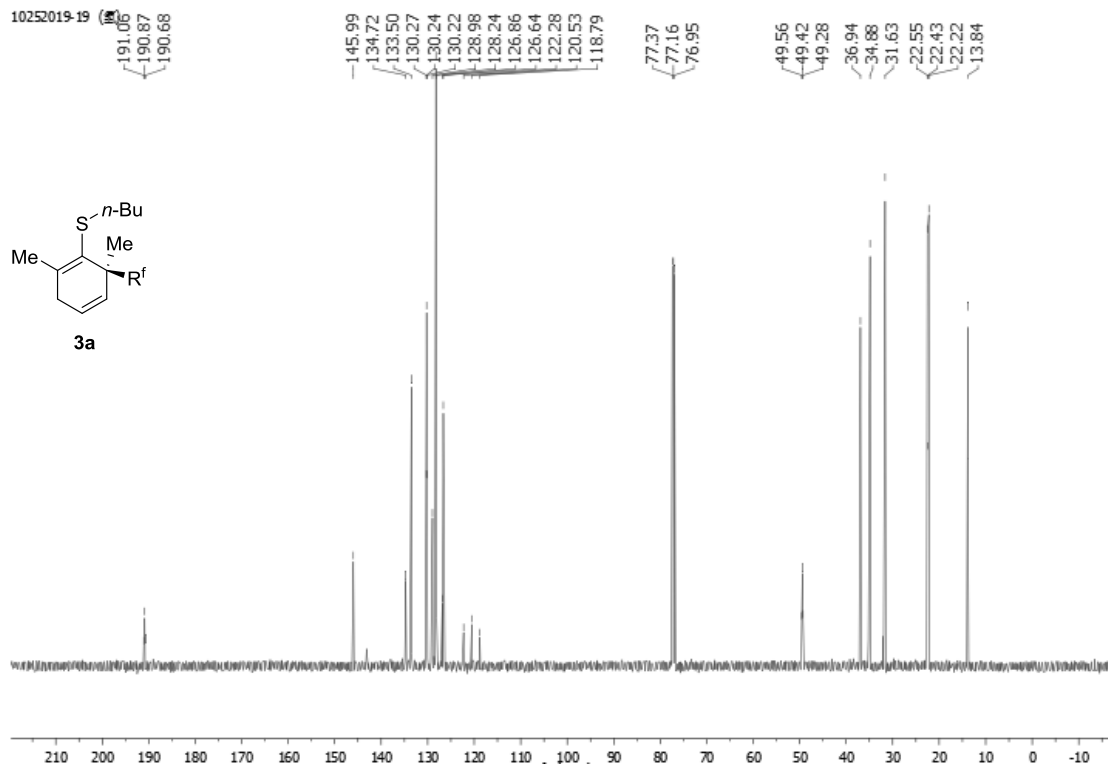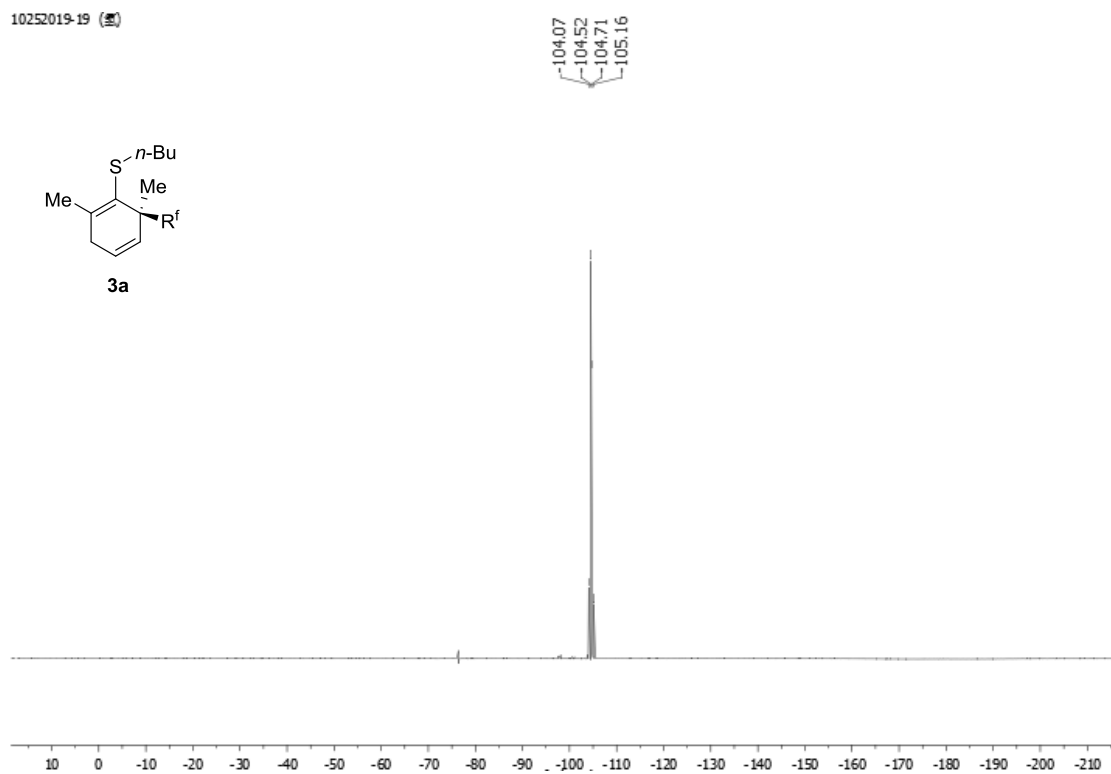



12122019-68 ZYG-05-161A +++ Me

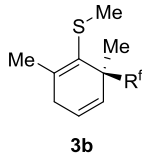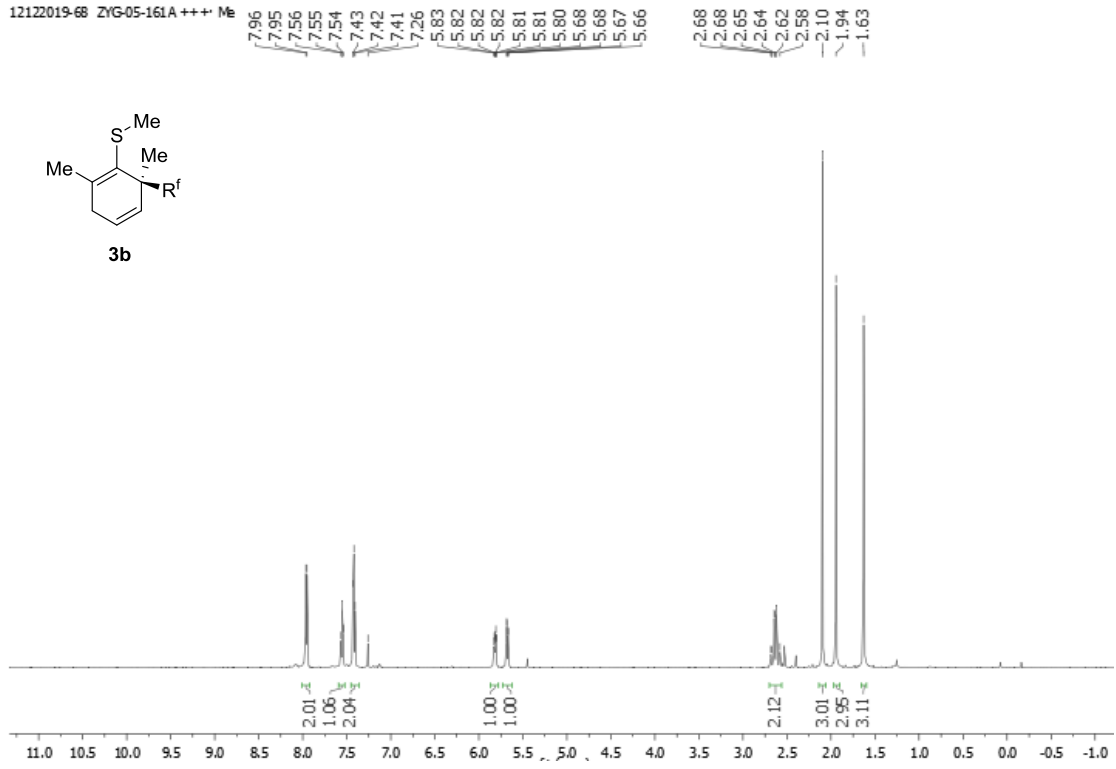

12132019-11

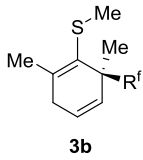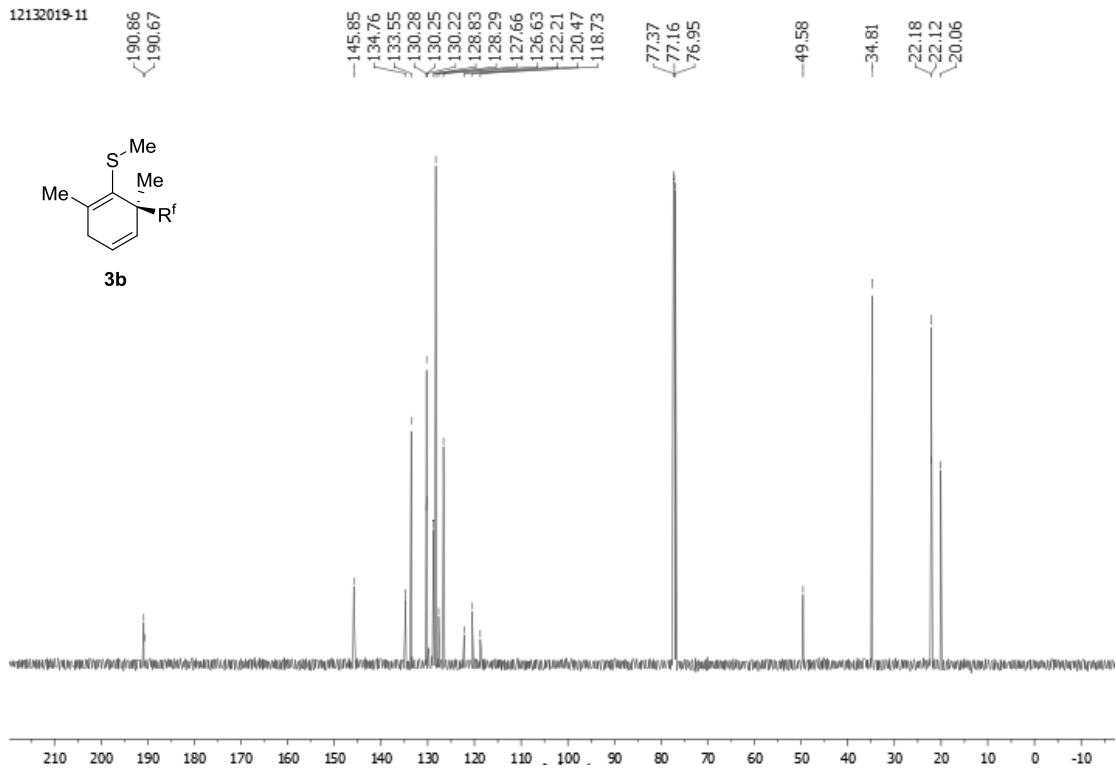

12132019-11

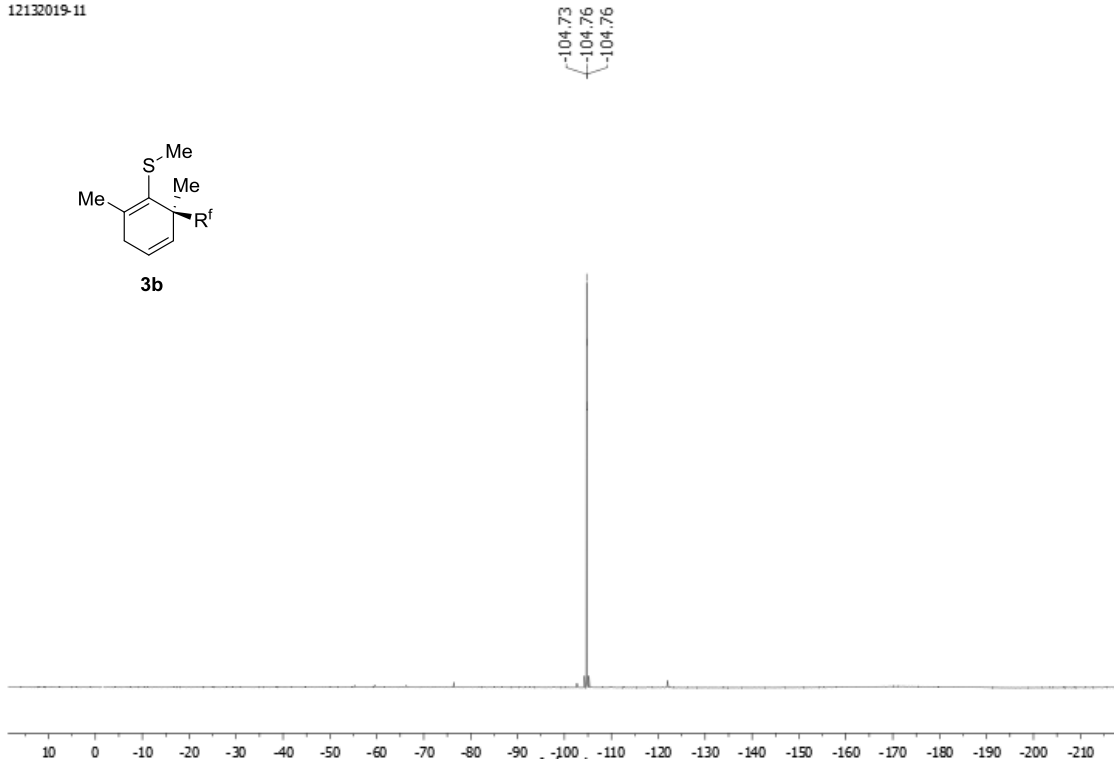

8.01, 7.99, 7.98, 7.58, 7.57, 7.46, 7.45, 7.44, 7.43, 7.31, 7.31, 7.30, 7.29, 7.28, 7.22, 7.21, 7.20, 7.19, 7.19, 7.18, 5.84, 5.84, 5.84, 5.72, 5.71, 5.70, 5.70, 2.67, 2.66, 2.64, 2.62, 2.62, 2.61, 2.60, 2.59, 2.59, 2.58, 2.58, 2.57, 2.56, 1.93, 1.73, 1.72, 1.71, 1.71, 1.70, 1.70, 1.69, 1.66, 1.62, 1.61, 1.60, 1.59

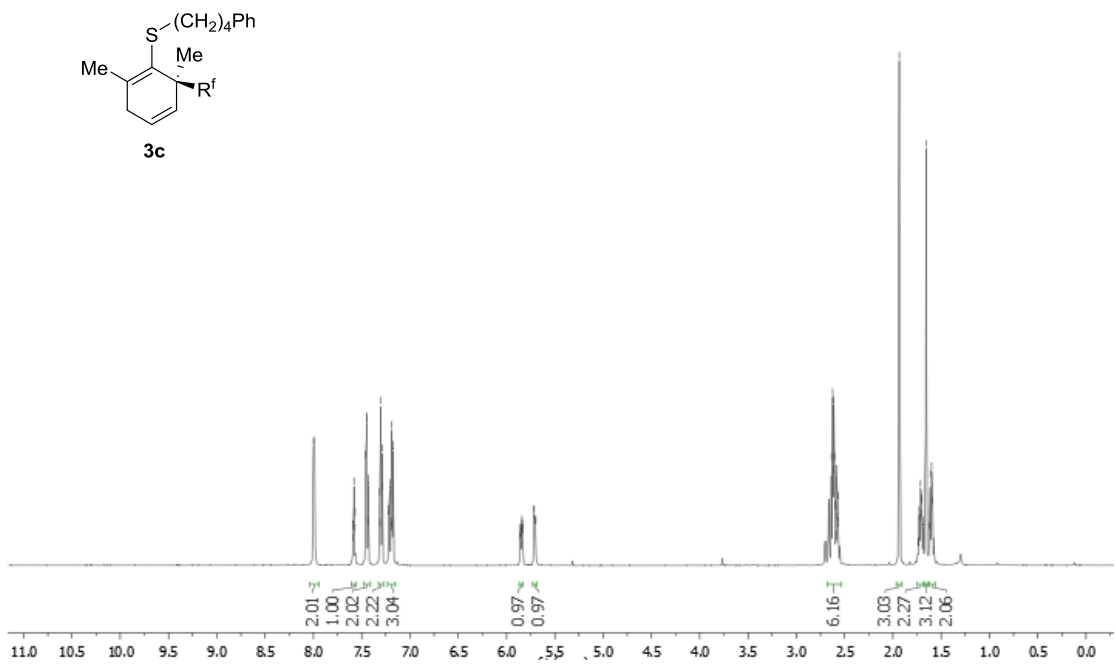

12132019-12 (+)

191.05  
190.86  
190.67

146.14  
142.27  
134.71  
133.53  
130.28  
130.26  
130.23  
128.95  
128.50  
128.40  
128.26  
126.73  
126.65  
125.85  
122.26  
120.52  
118.78

77.37  
77.16  
76.95

49.55  
49.40  
49.26  
36.97  
35.65  
34.88  
30.80  
29.09  
22.59  
22.46

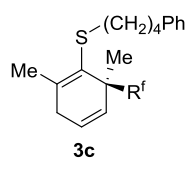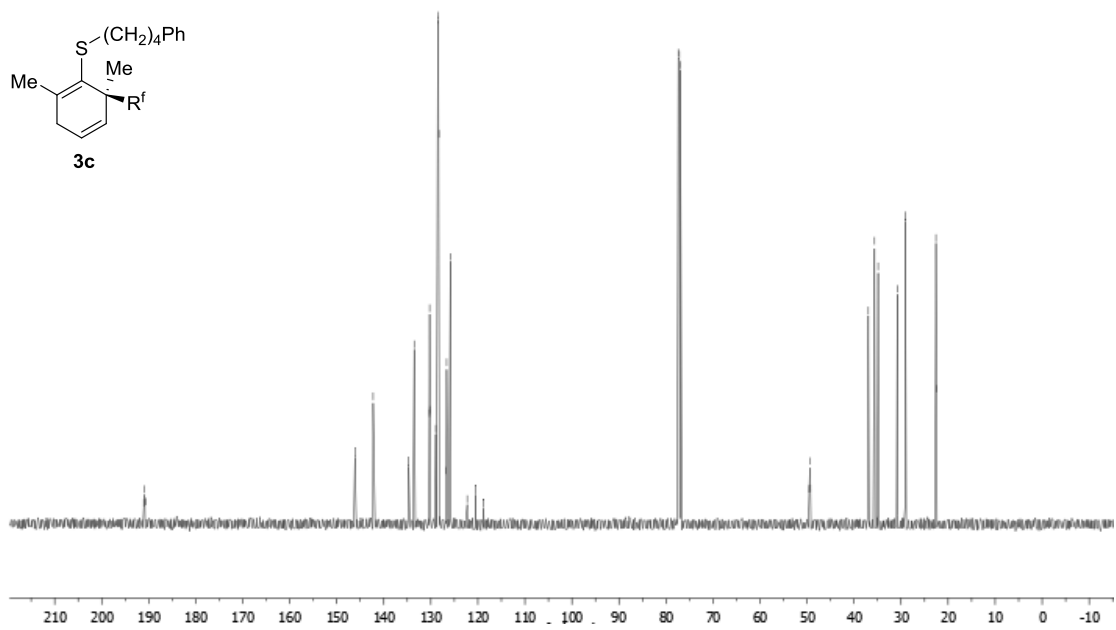

12132019-12 (l+)

104.07  
104.52  
104.67  
105.12

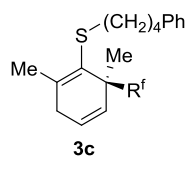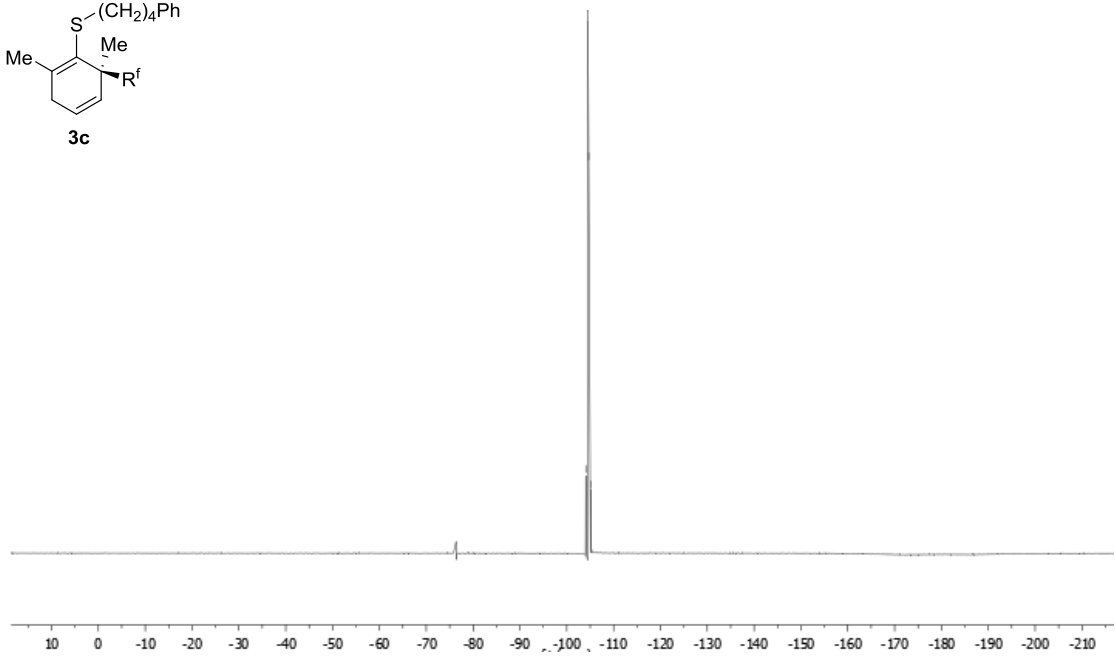

10292019-42 (ZYG-05-130A) 对甲基

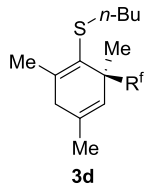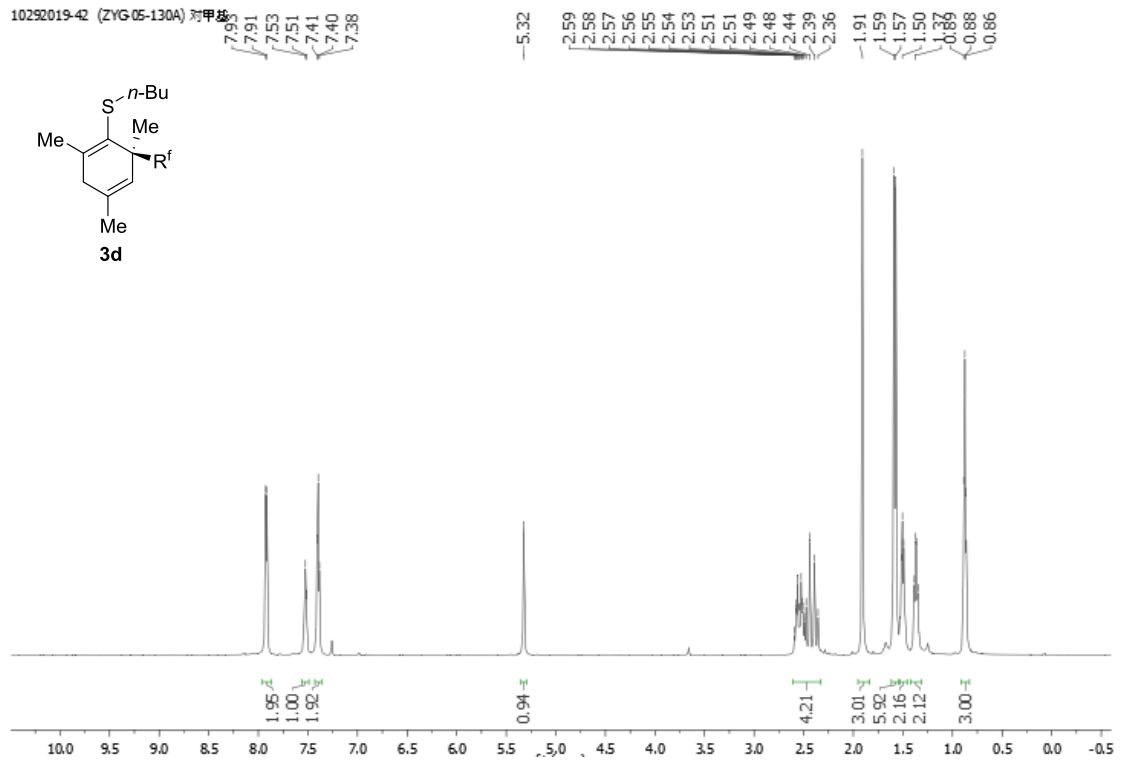

10292019-42 (ZYG-05-130A) 对甲基

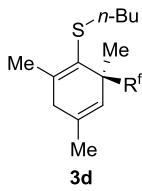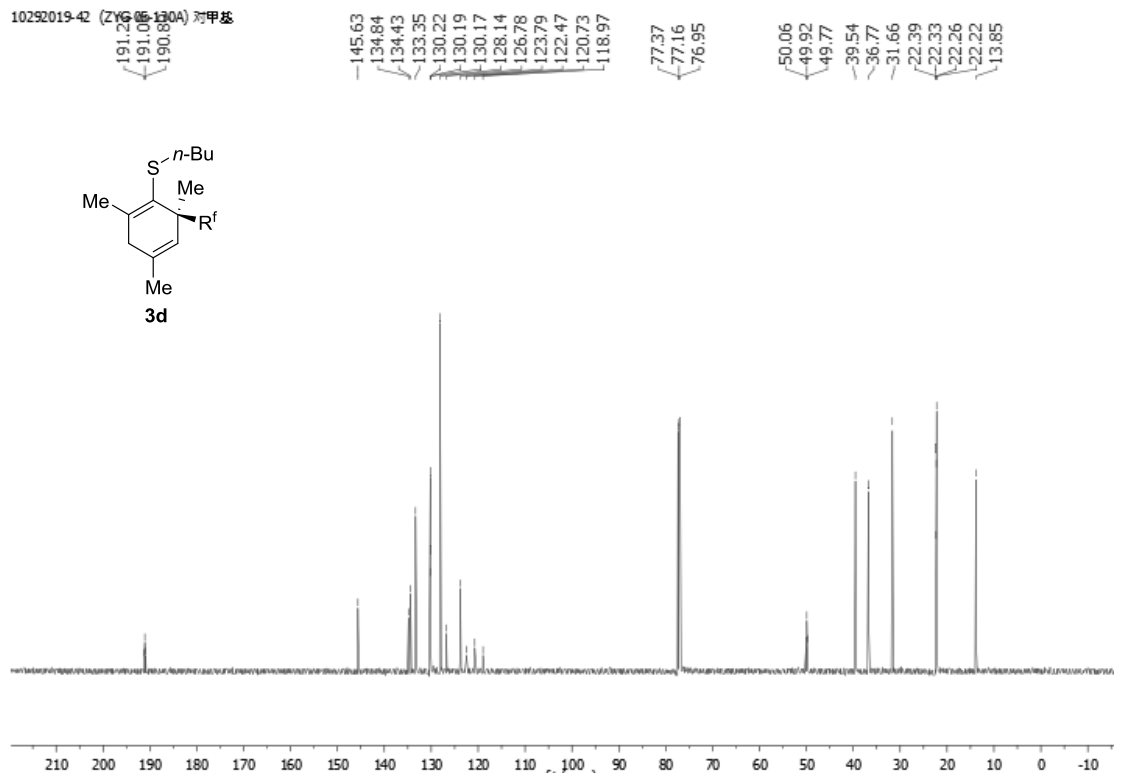

10292019-42 (ZYG-05-130A) 对甲基

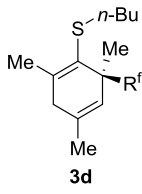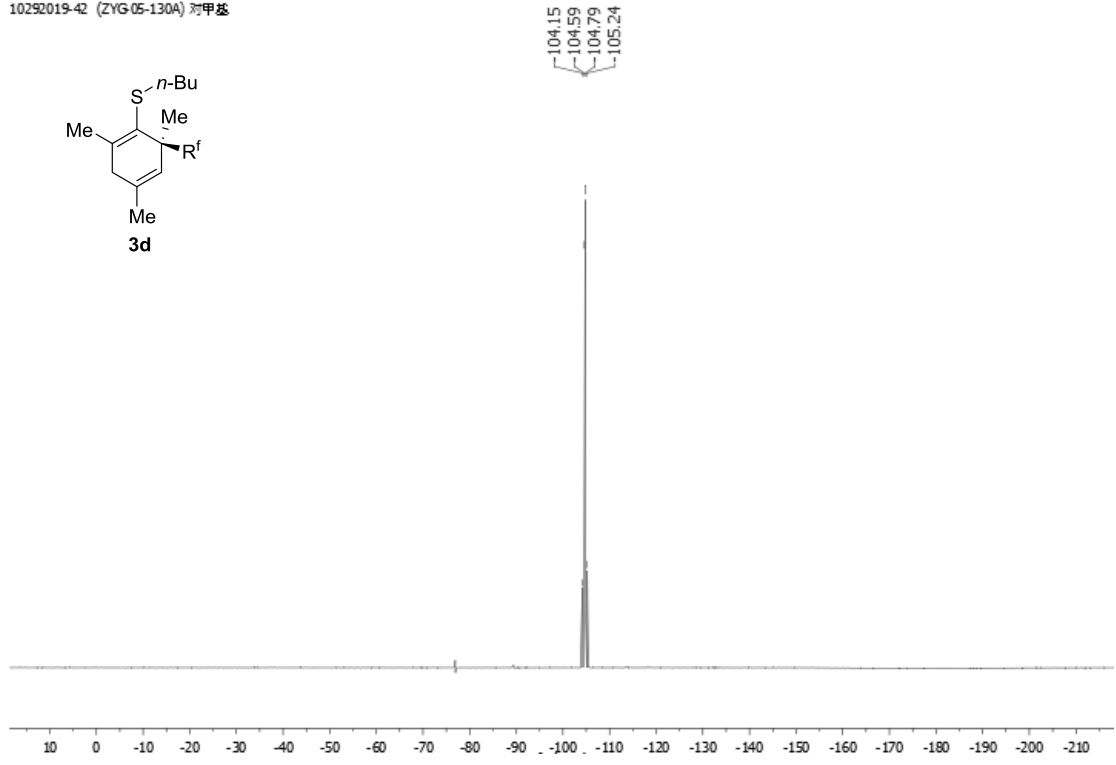

112.70, 79.91, 75.54, 75.14, 74.44, 7.37, 7.37, 7.36, 7.36, 7.35, 7.35, 7.32, 7.31, 7.31, 7.30, 7.30, 7.29, 7.29, 7.28, 7.28, 7.27, 7.27, 7.26, 7.26, 5.97, 5.96, 3.04, 3.01, 2.90, 2.89, 2.62, 2.62, 2.62, 2.61, 2.59, 2.59, 2.58, 2.56, 2.56, 2.02, 1.72, 1.55, 1.54, 1.53, 1.52, 1.51, 1.41, 1.41, 1.40, 1.39, 1.39, 0.91, 0.90, 0.88

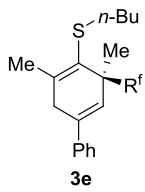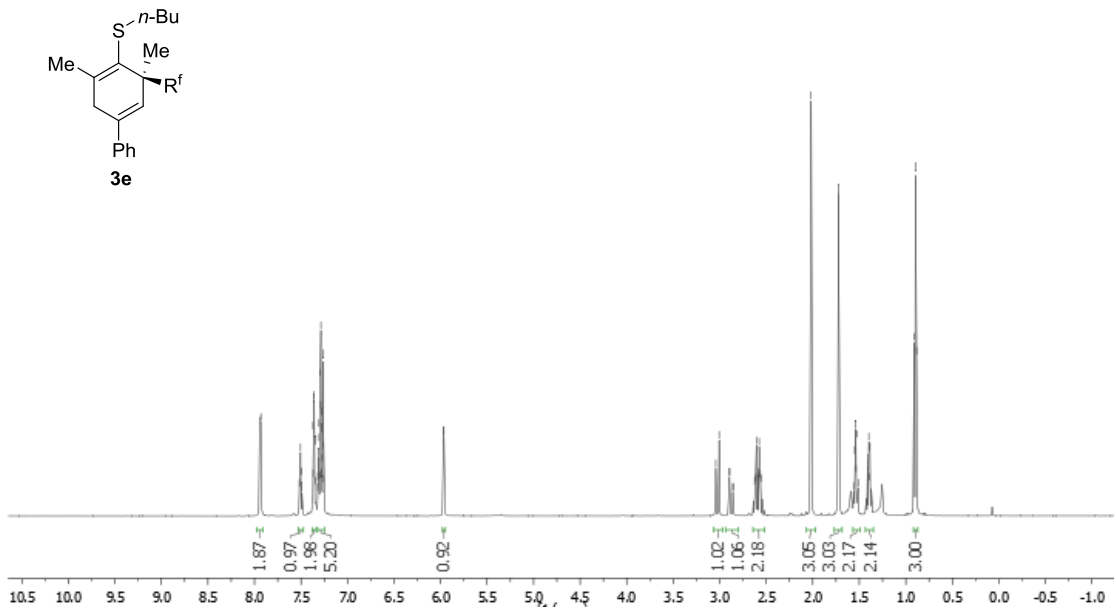

11272019-44 ZYG-05-141A

191.06  
190.85  
190.64  
145.75  
139.60  
136.57  
134.70  
133.47  
130.27  
130.24  
130.21  
128.47  
128.29  
127.85  
126.73  
125.63  
125.48  
122.43  
120.69  
118.93  
77.37  
77.16  
76.95  
50.59  
50.44  
50.30  
37.06  
36.92  
31.72  
22.71  
22.56  
22.27  
13.88

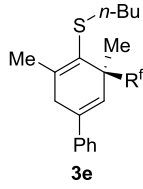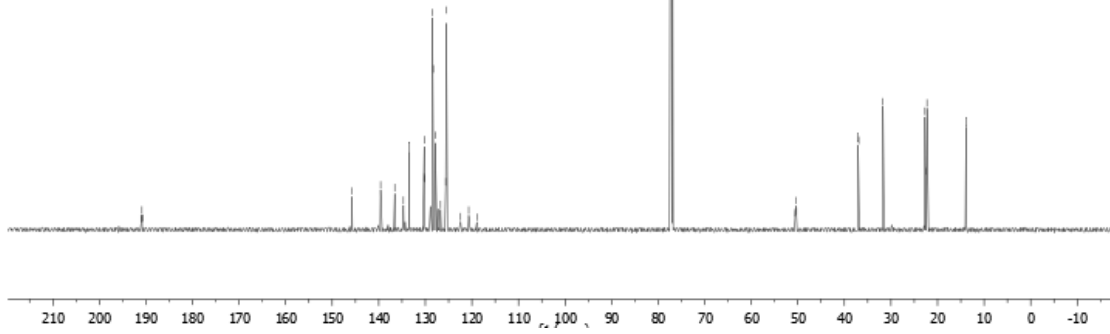

11272019-44 ZYG-05-141A

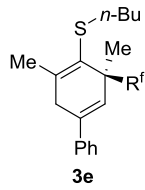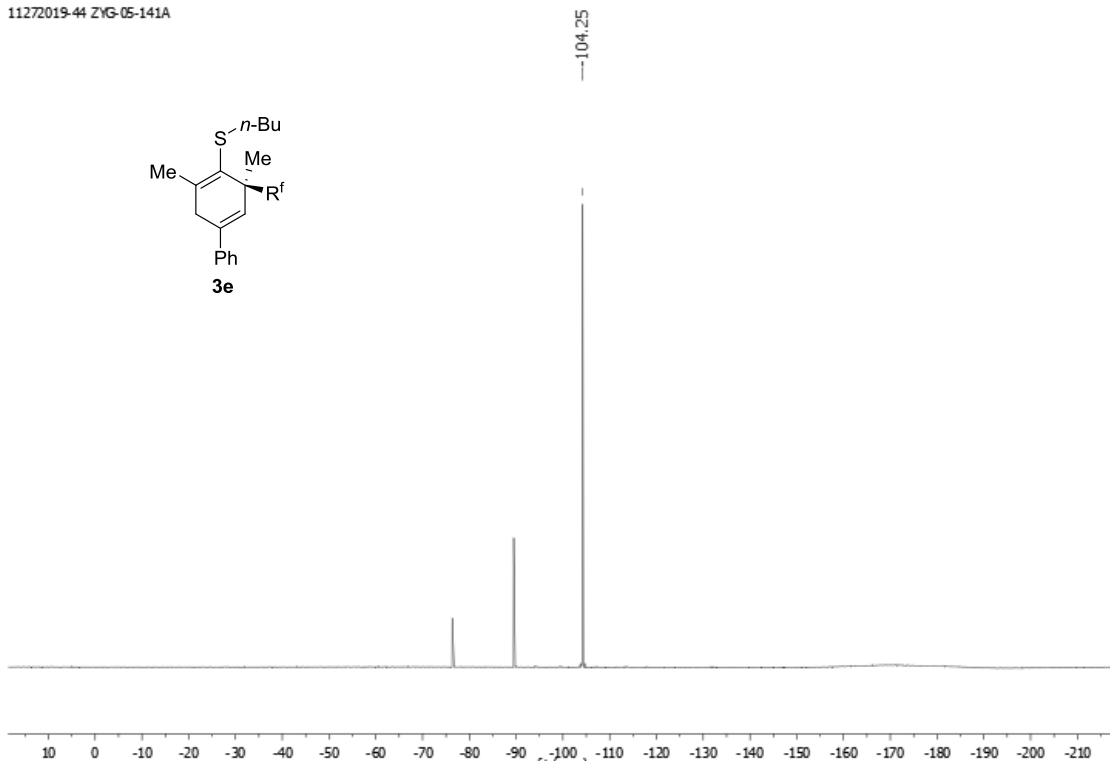

11082019-23 (ZYG-05-132F)

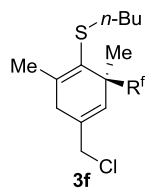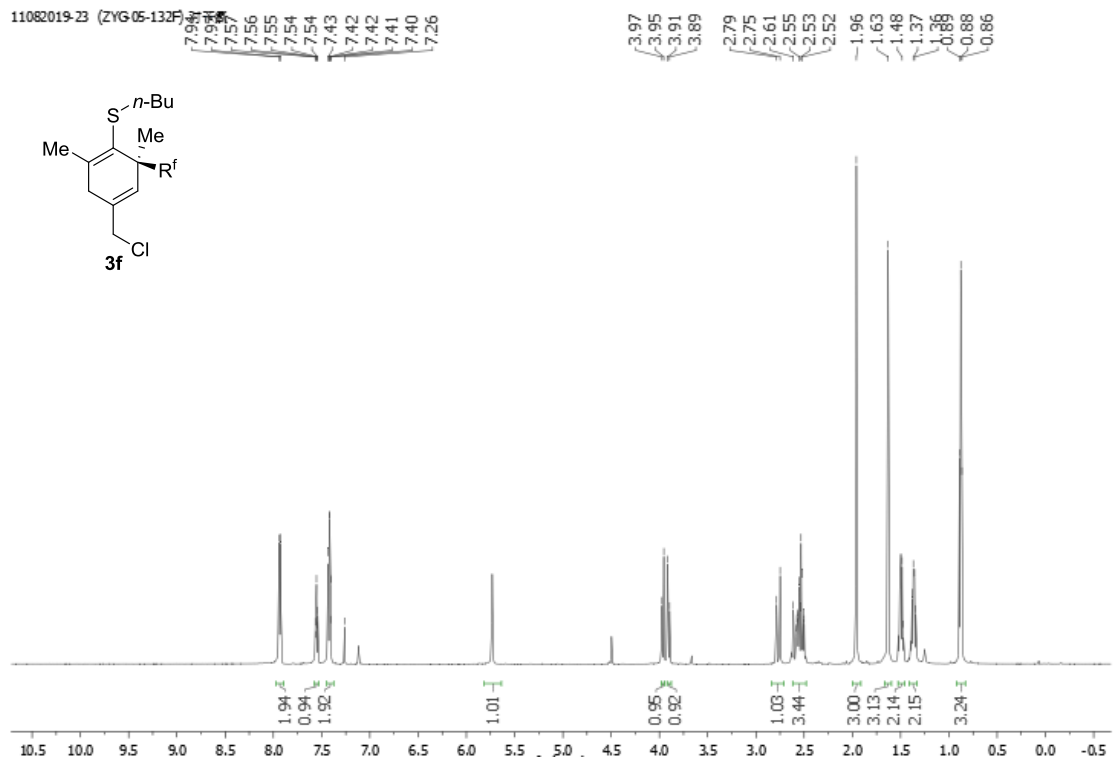

11082019-23 (ZYG-05-132F) 对苯基

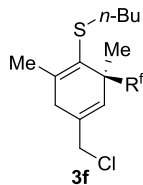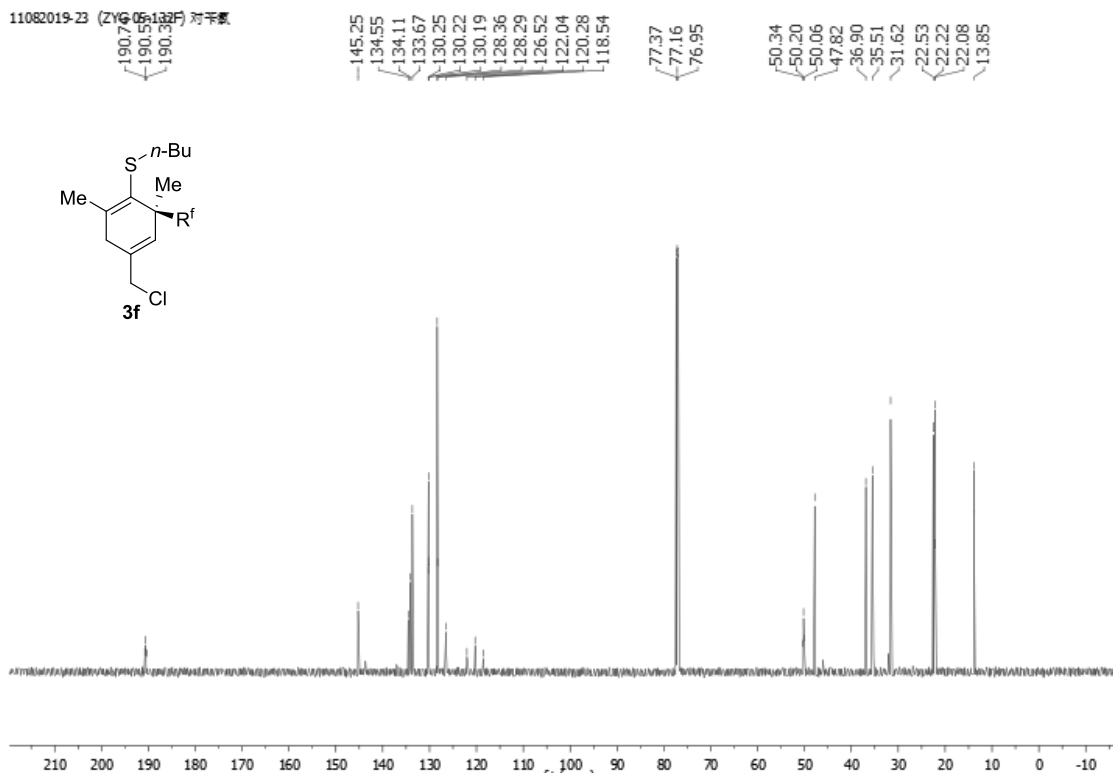

11082019-23 (ZYG-05-132F) 对干板

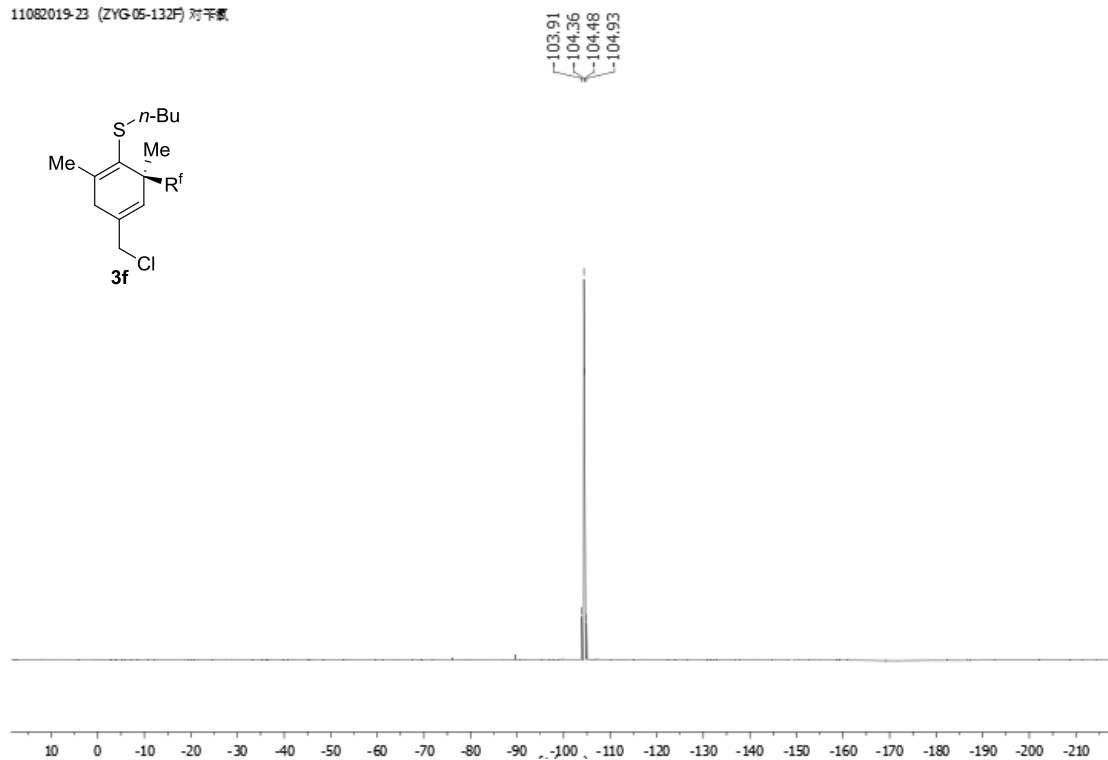

11012019-16 (ZYG-05-132C) 对干板

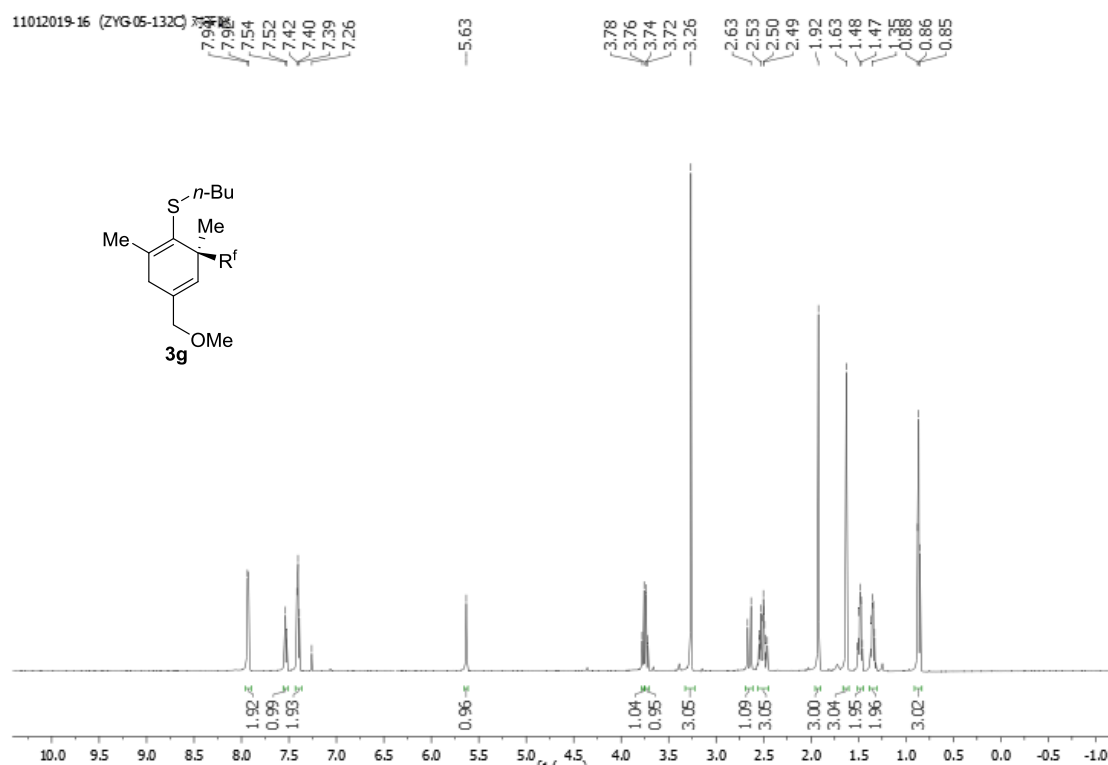



11012019-16 (ZYG-05-132C) 对干磁

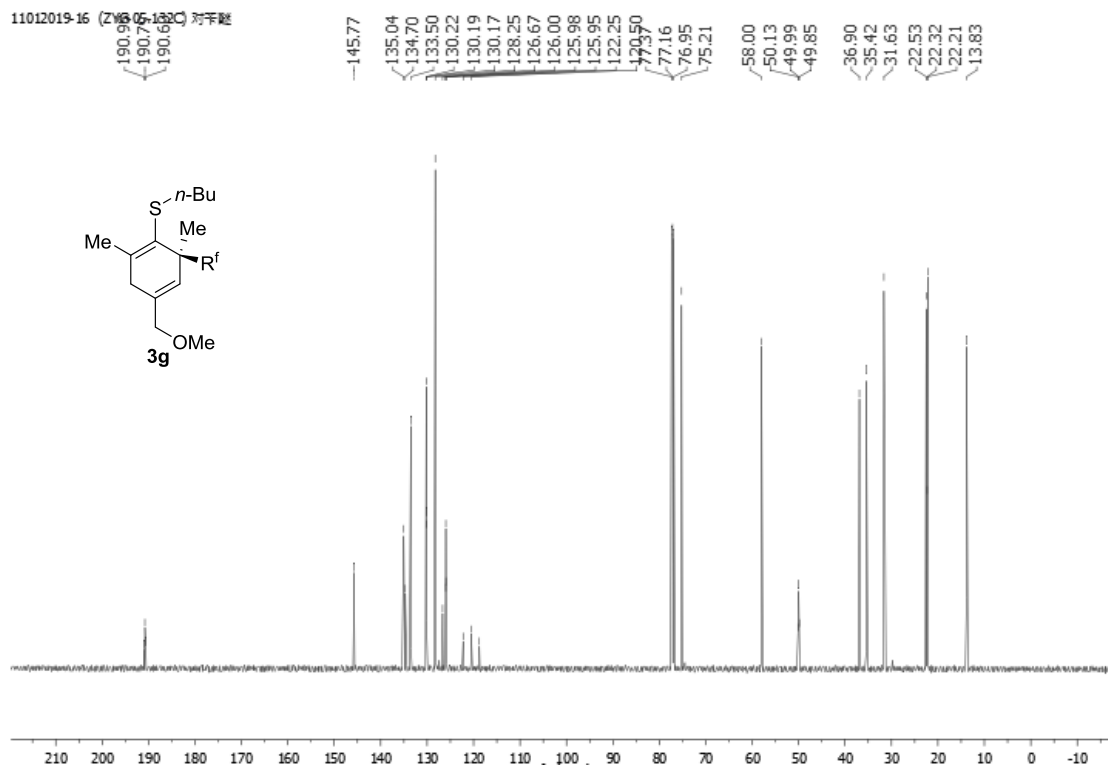

11012019-16 (ZYG-05-132C) 对干磁

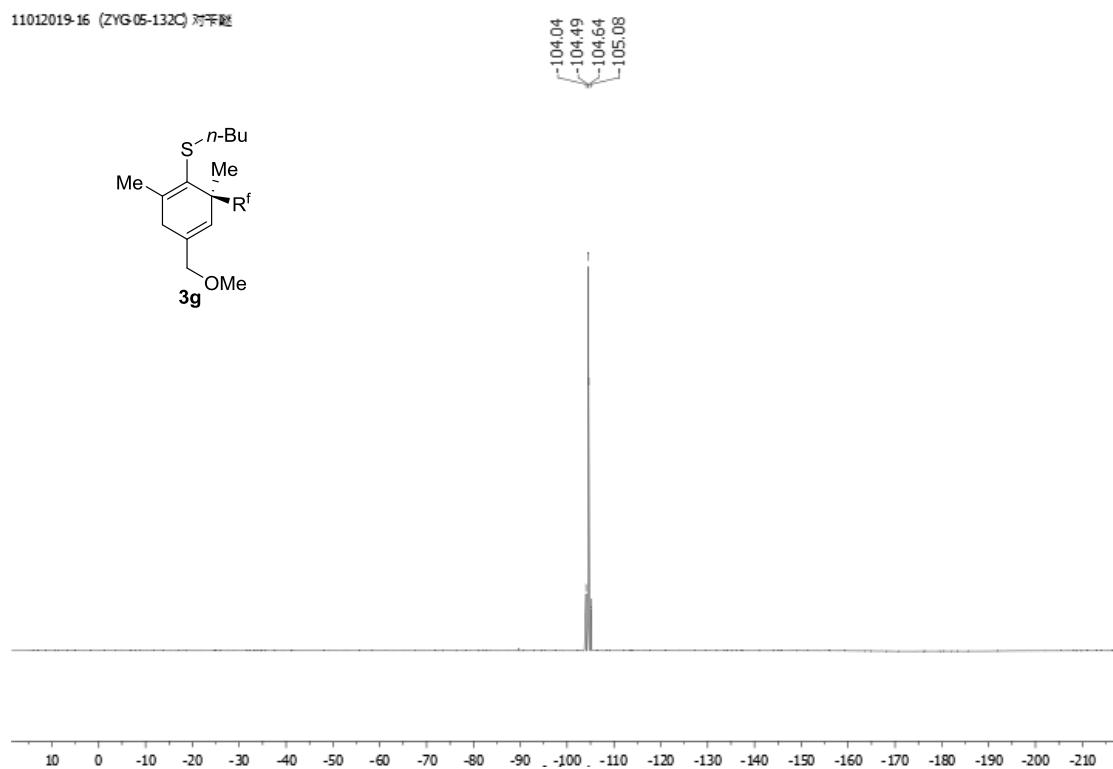

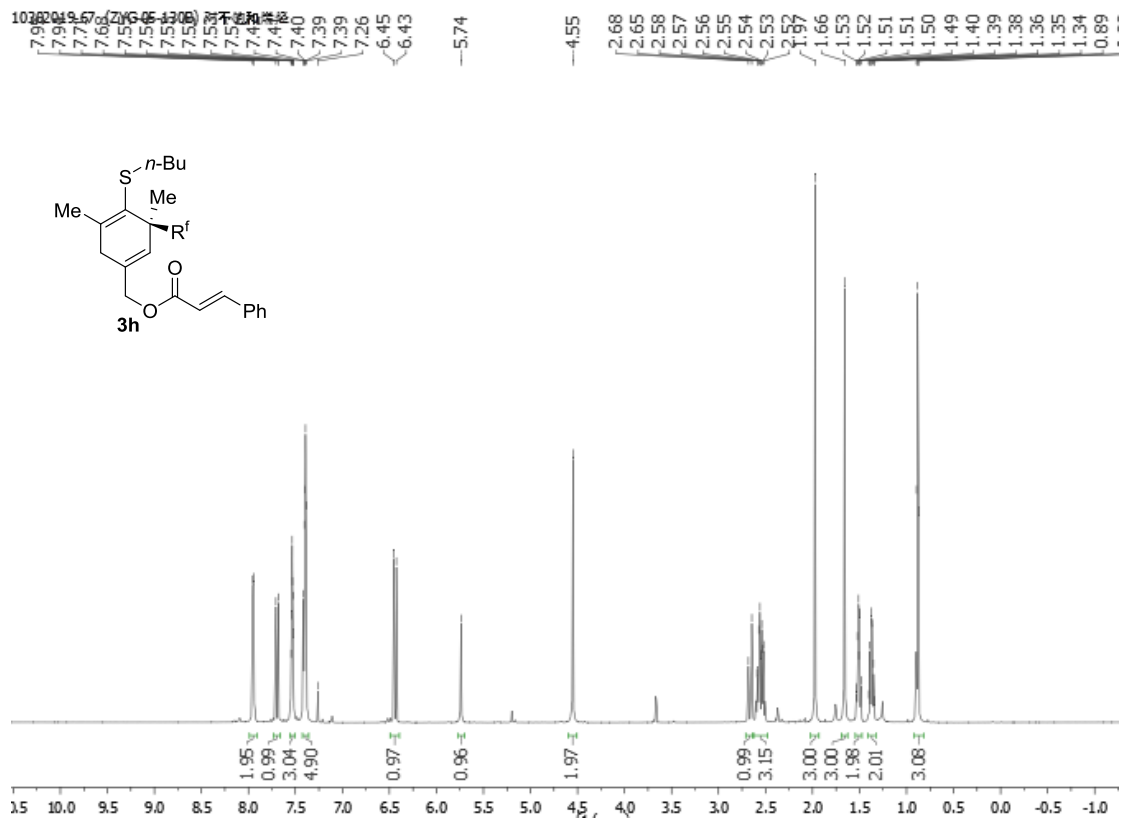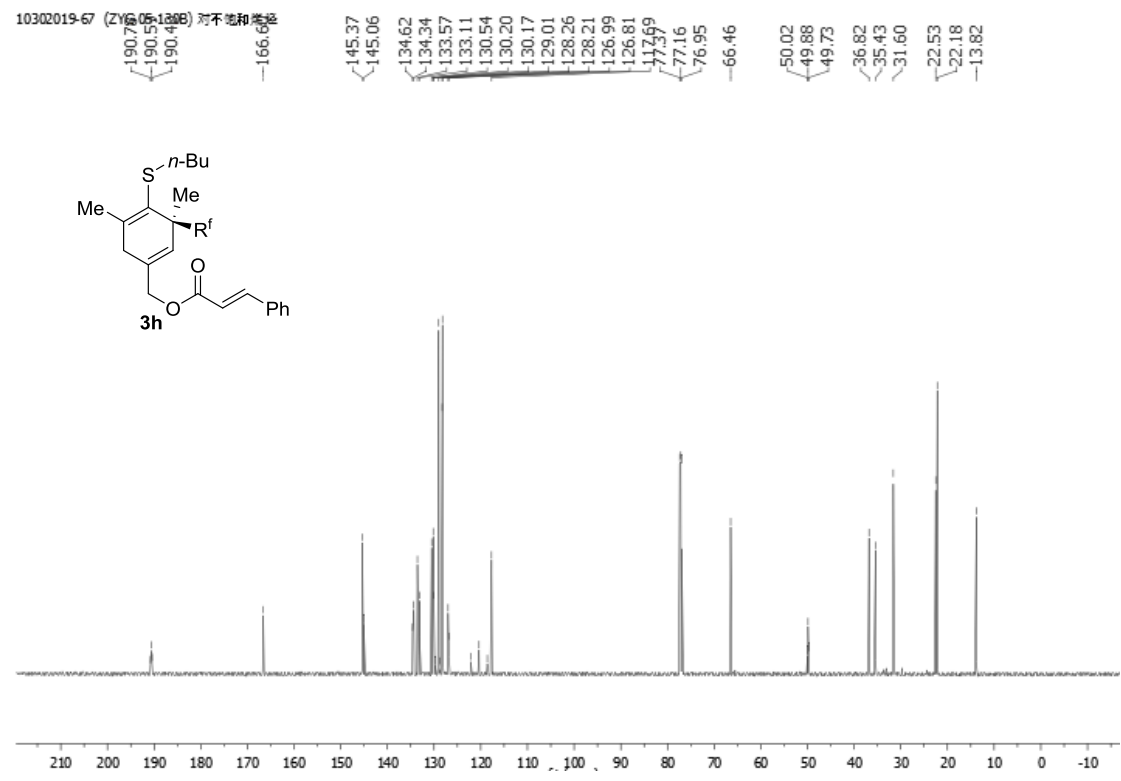

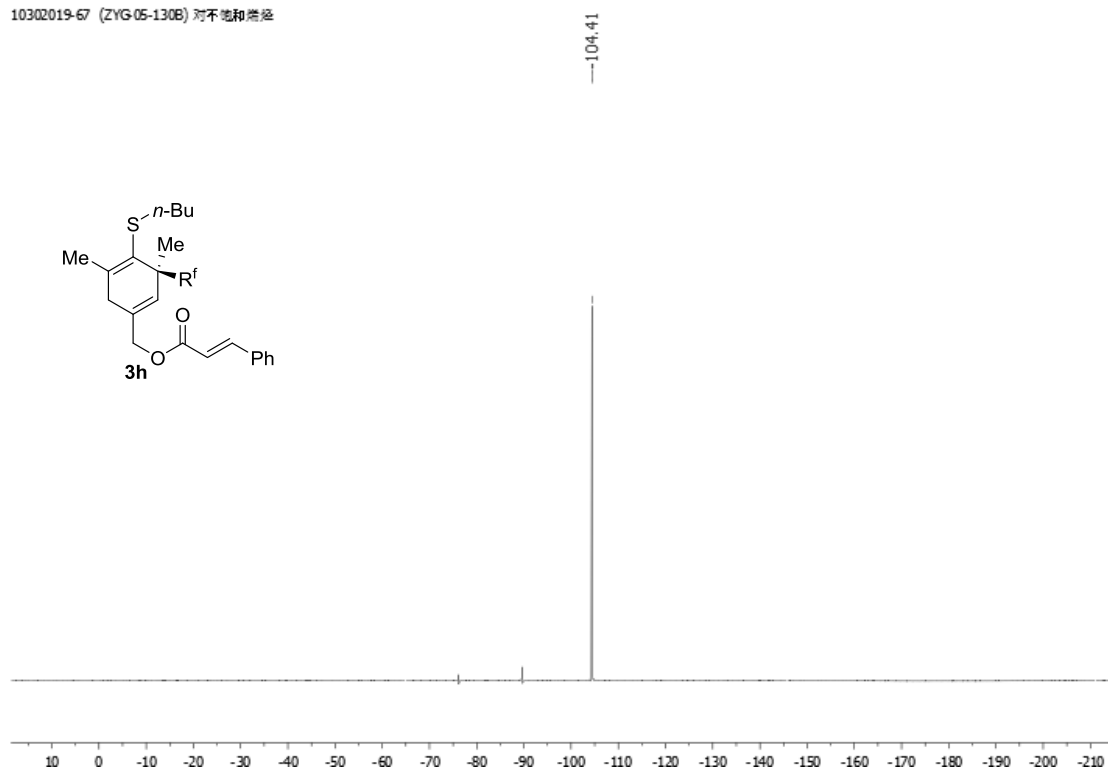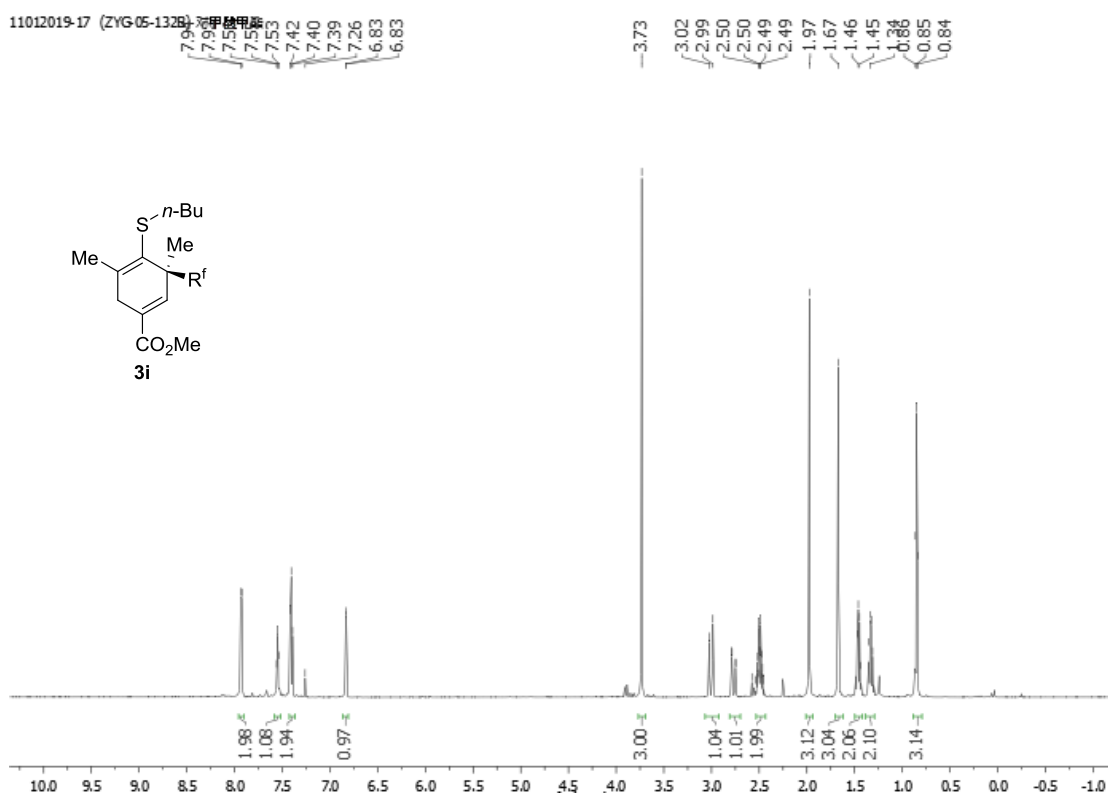

11012019-32

190.25  
190.06  
189.86

166.31  
145.82  
138.83  
138.81  
134.23  
133.77  
130.21  
130.19  
130.16  
129.41  
128.36  
125.71  
121.68  
119.92  
118.17

77.37  
77.16  
76.95

52.02  
50.93  
50.78  
50.64  
36.88  
34.02  
31.54  
22.59  
22.16  
21.88  
13.78

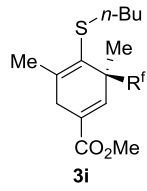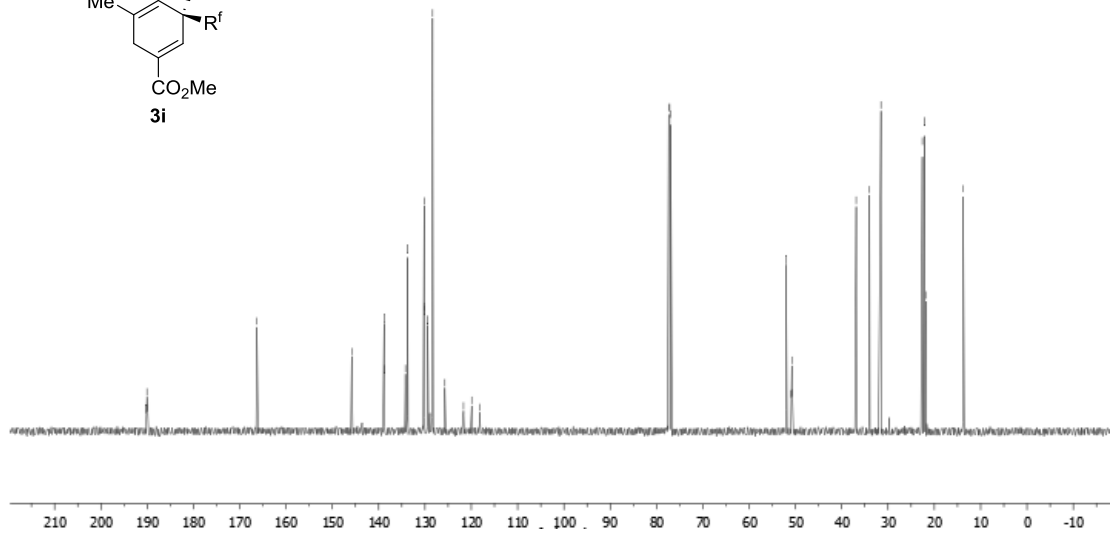

11012019-32

103.24  
103.70  
104.22  
104.68

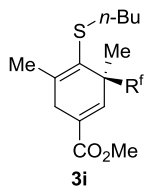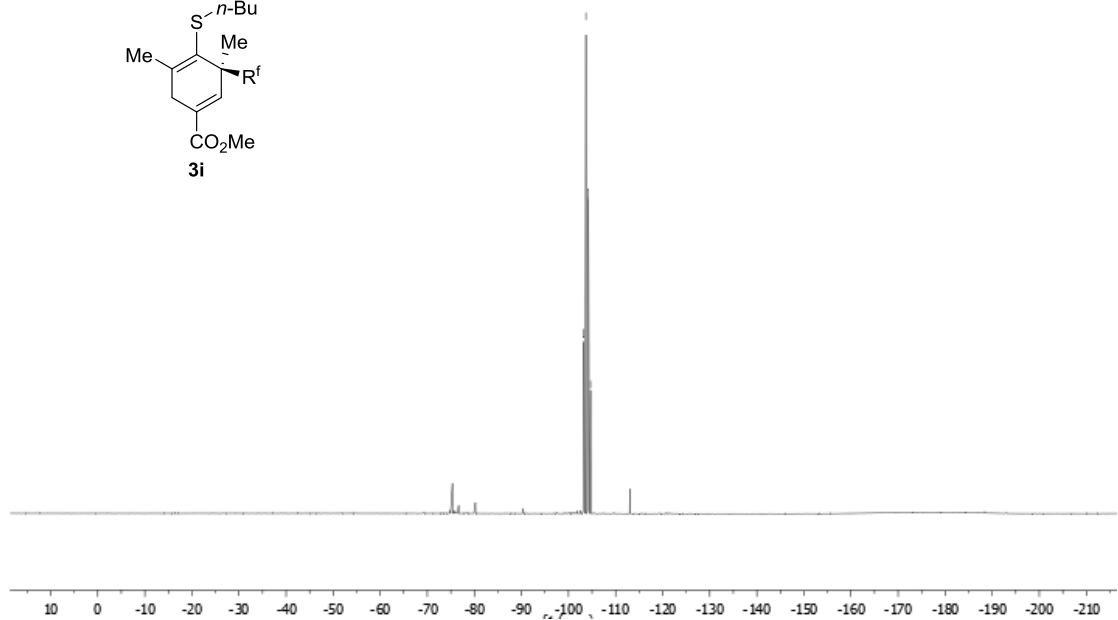

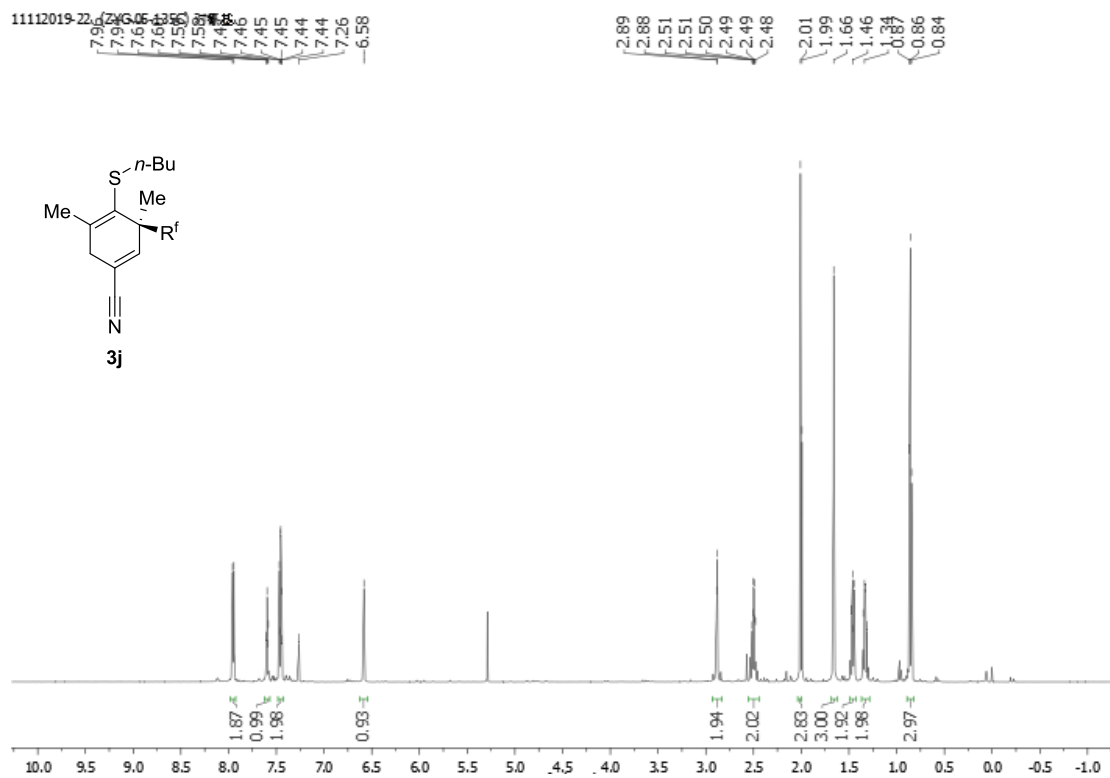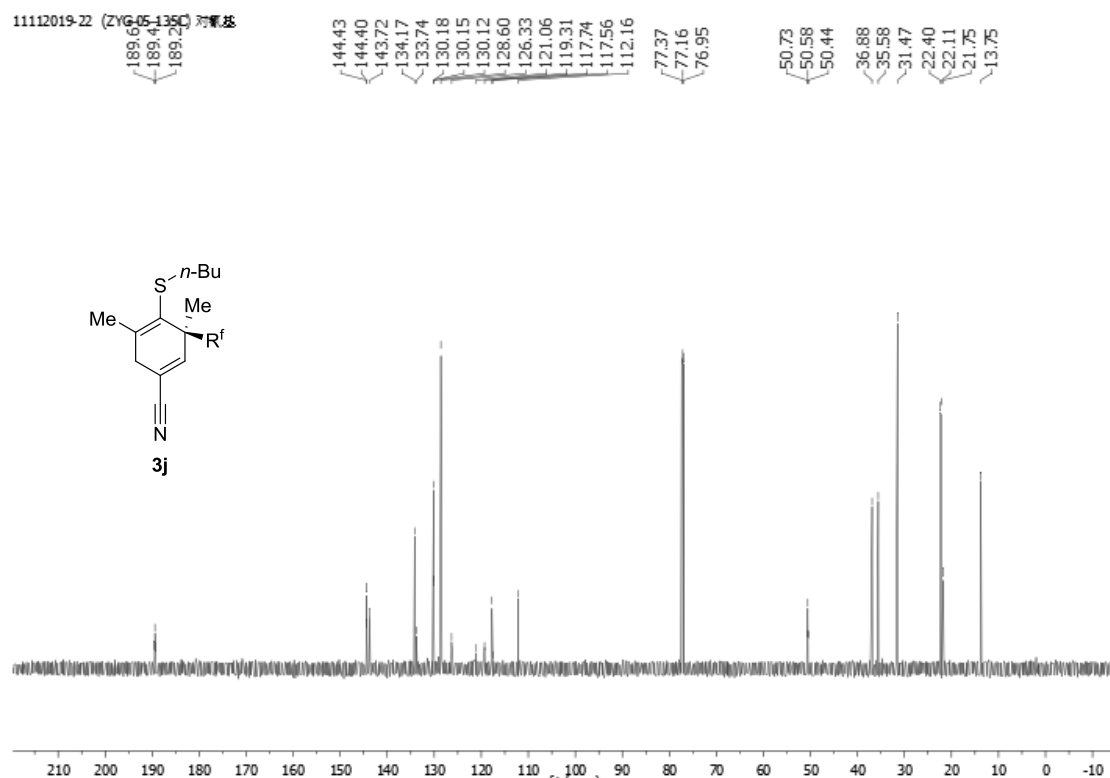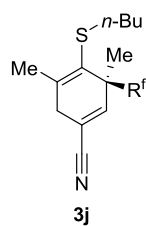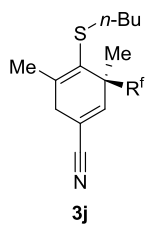

1112019-22 (ZYG-05-135C) 对苯基

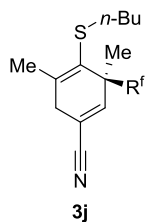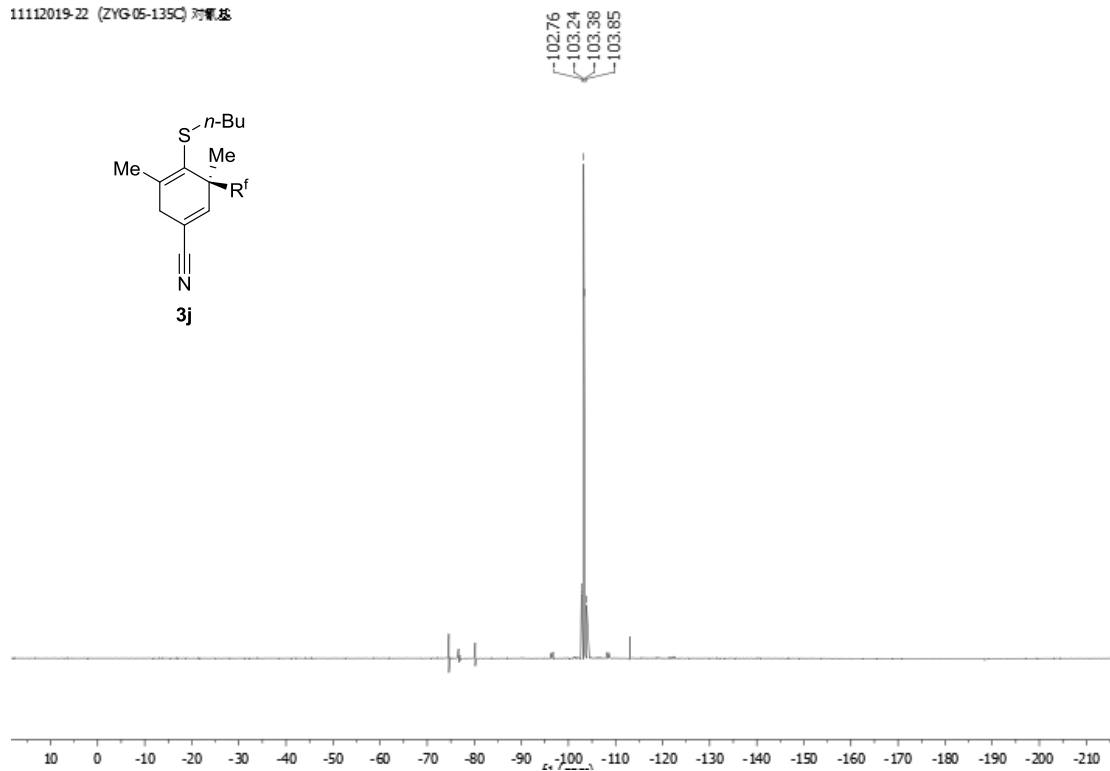

11152019-71 (ZYG-05-135B) 对苯基

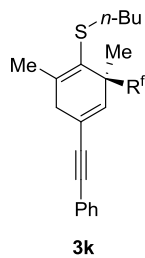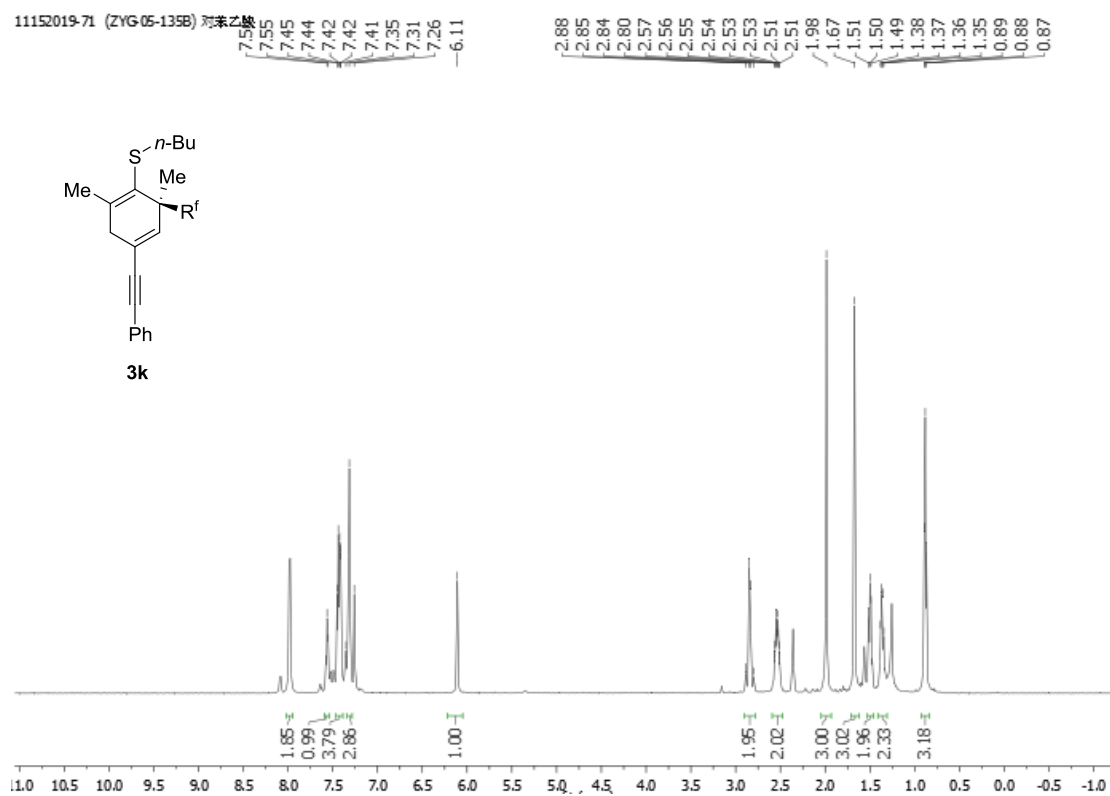

11112019-21 (ZYG-05-135B) 对苯乙炔

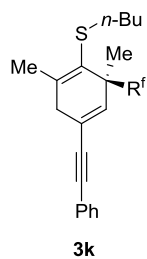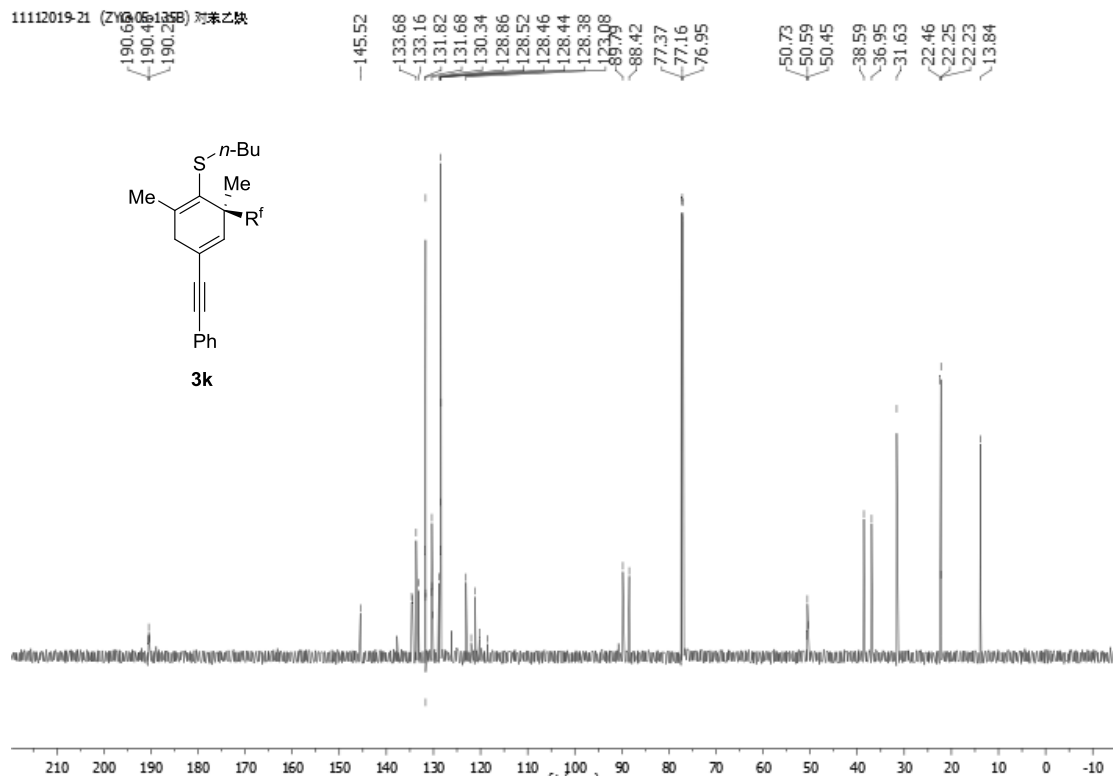

11152019-71 (ZYG-05-135B) 对苯乙炔

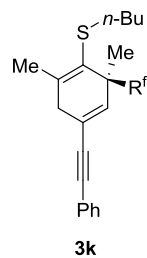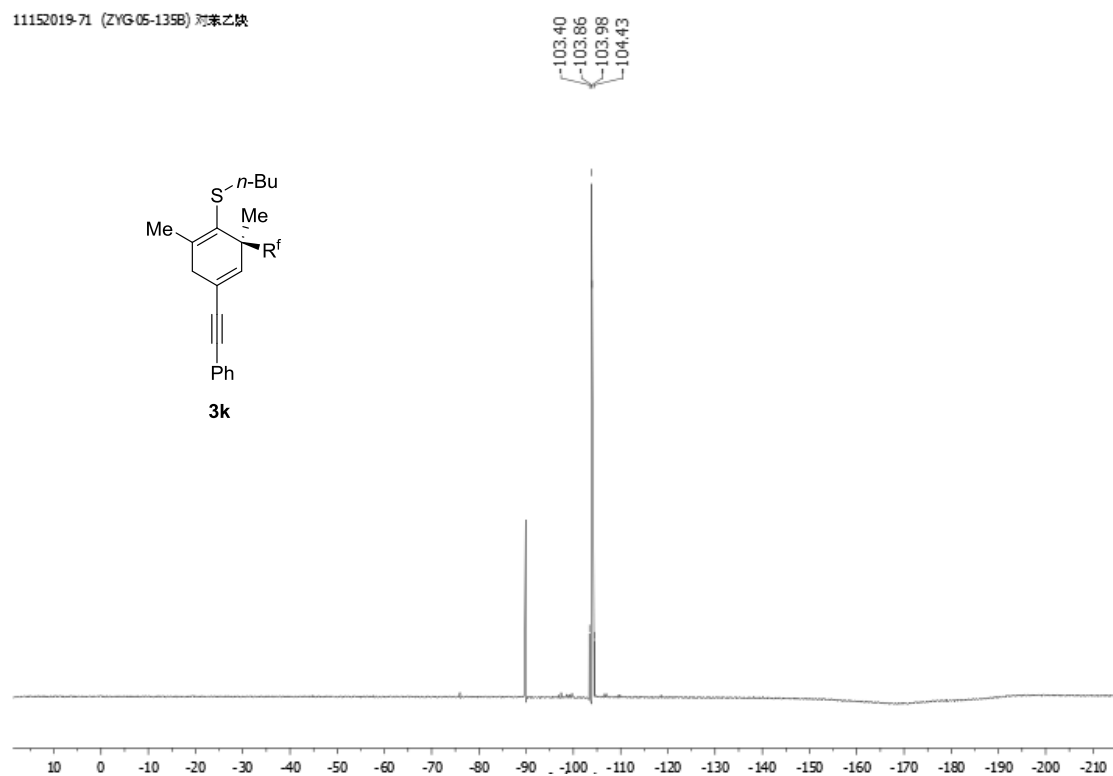

11052019-10 ZYG-05-1320 谱

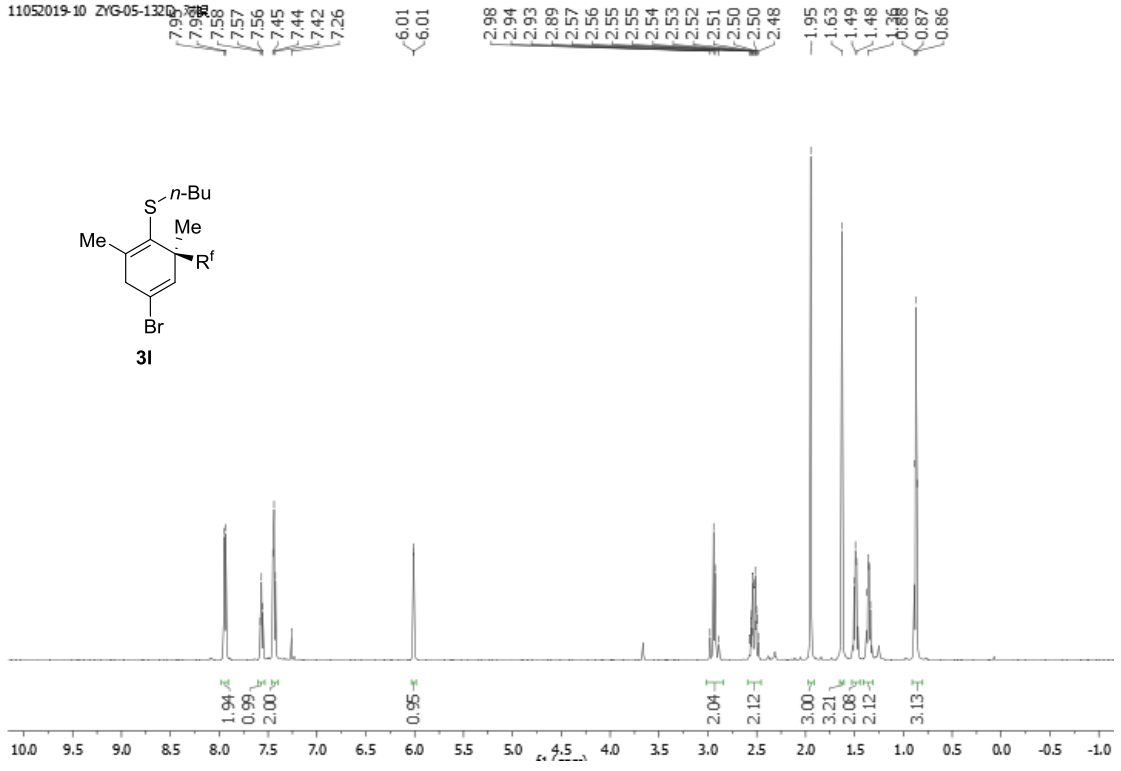

11052019-10 ZYG-05-1320 谱

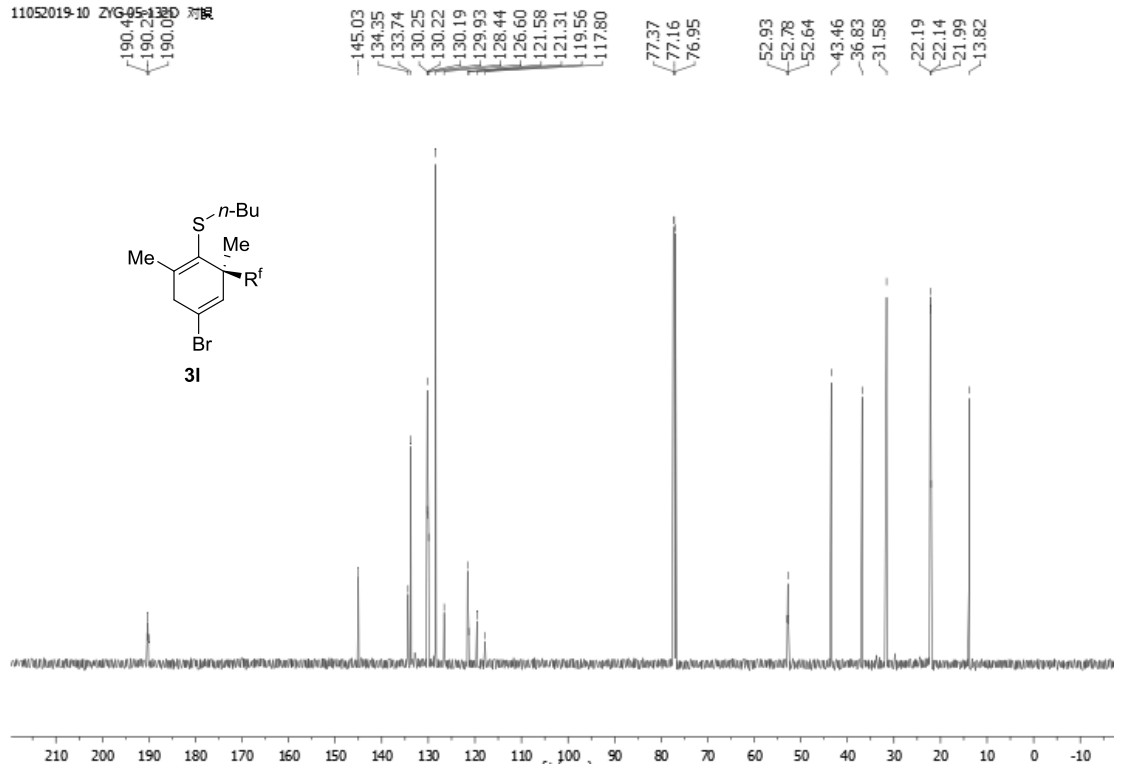



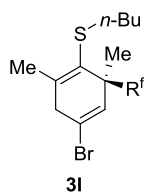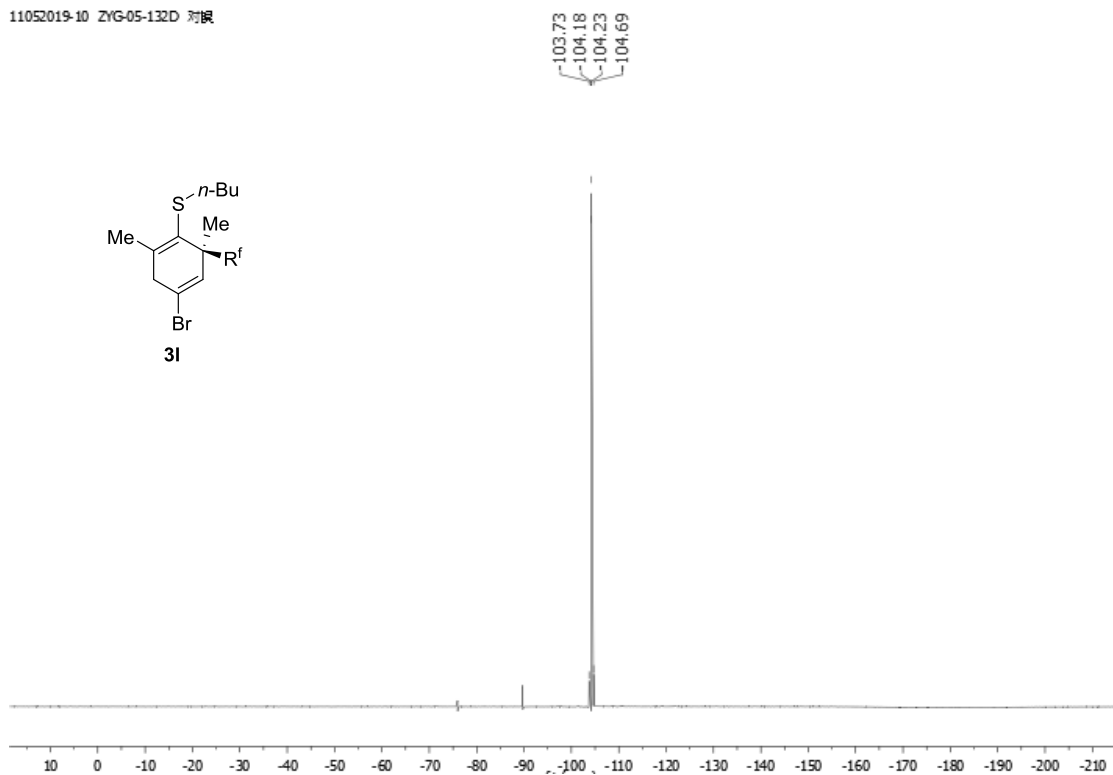

11052019-10 ZYG-05-132D 对照  
 7.99, 7.96, 7.94, 7.54, 7.52, 7.46, 7.45, 7.39, 5.89, 5.87, 5.85, 5.51, 5.50, 5.48, 5.48, 2.70, 2.68, 2.68, 2.65, 2.64, 2.62, 2.62, 2.62, 2.61, 2.60, 2.59, 2.58, 2.57, 2.56, 2.56, 2.55, 2.55, 2.54, 2.53, 2.53, 2.42, 2.40, 1.79, 1.77, 1.76, 1.54, 1.53, 1.52, 1.39, 1.38, 1.37, 1.35, 0.99, 0.97, 0.96, 0.90, 0.89, 0.87

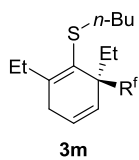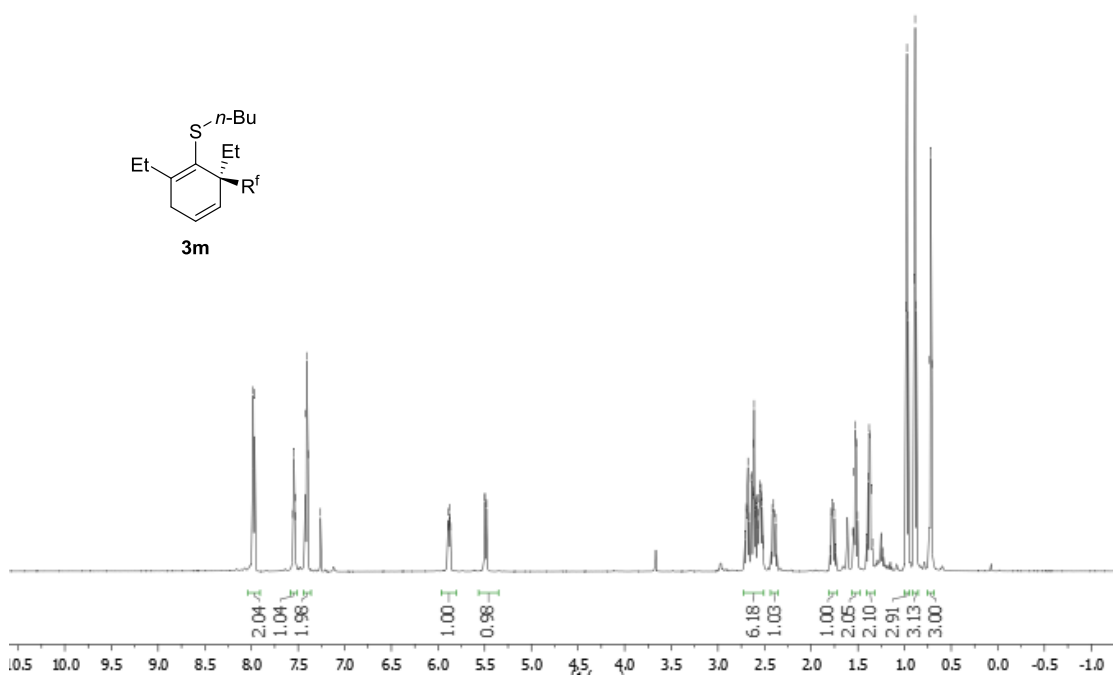

11052019-11 ZYG-05-132 二乙基

191.29  
191.06  
190.87

152.29  
134.93  
133.45  
130.42  
130.40  
130.37  
128.23  
127.09  
124.55  
122.24  
120.50  
118.74

77.37  
77.16  
76.95

53.96  
53.83  
53.69

37.04  
31.86  
31.81  
29.41  
25.17  
22.27  
13.89  
12.66  
8.94

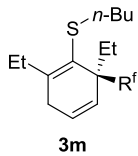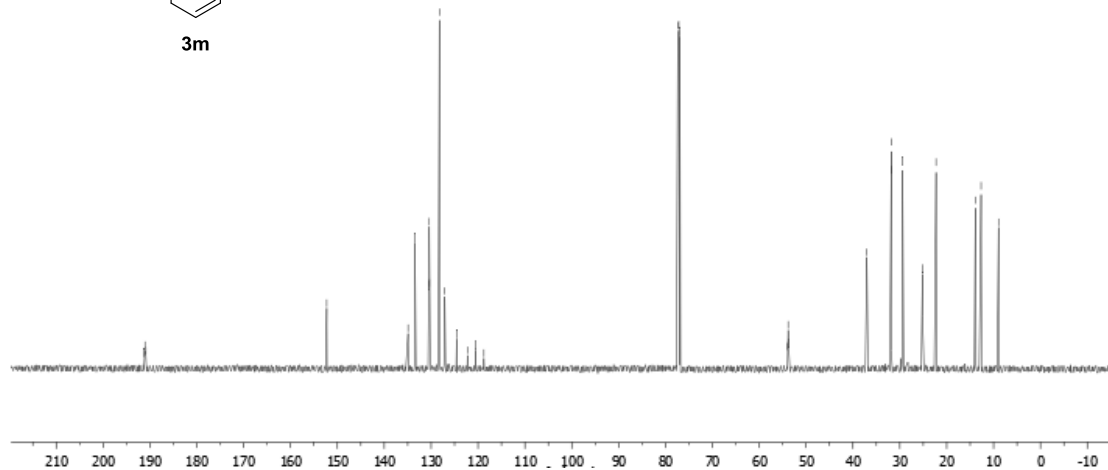

11052019-11 ZYG-05-132 二乙基

102.49  
102.94  
103.35  
103.80

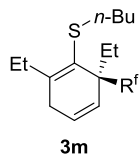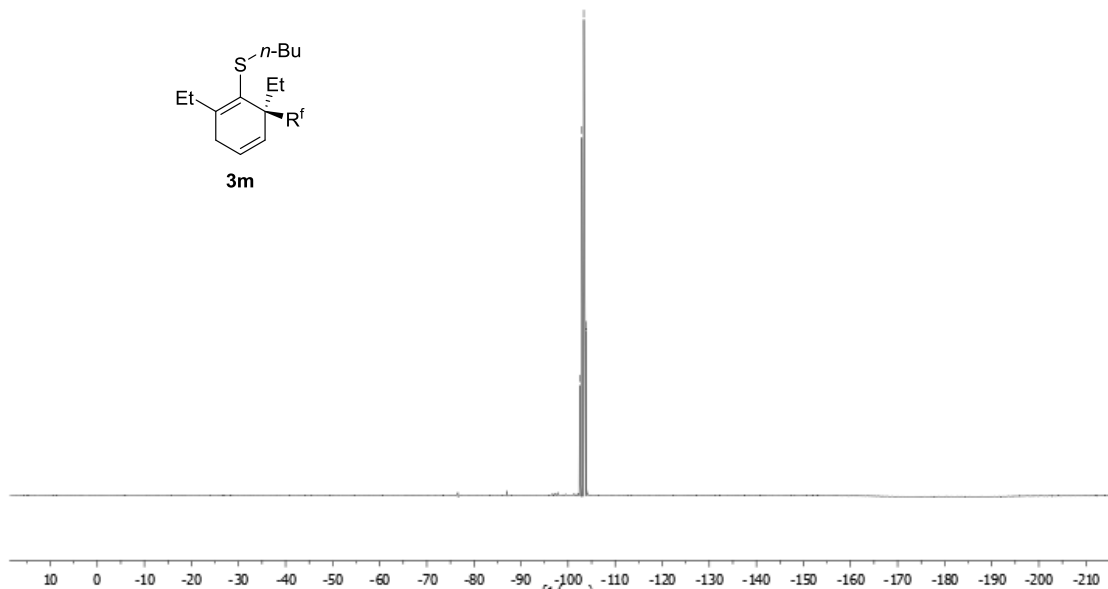

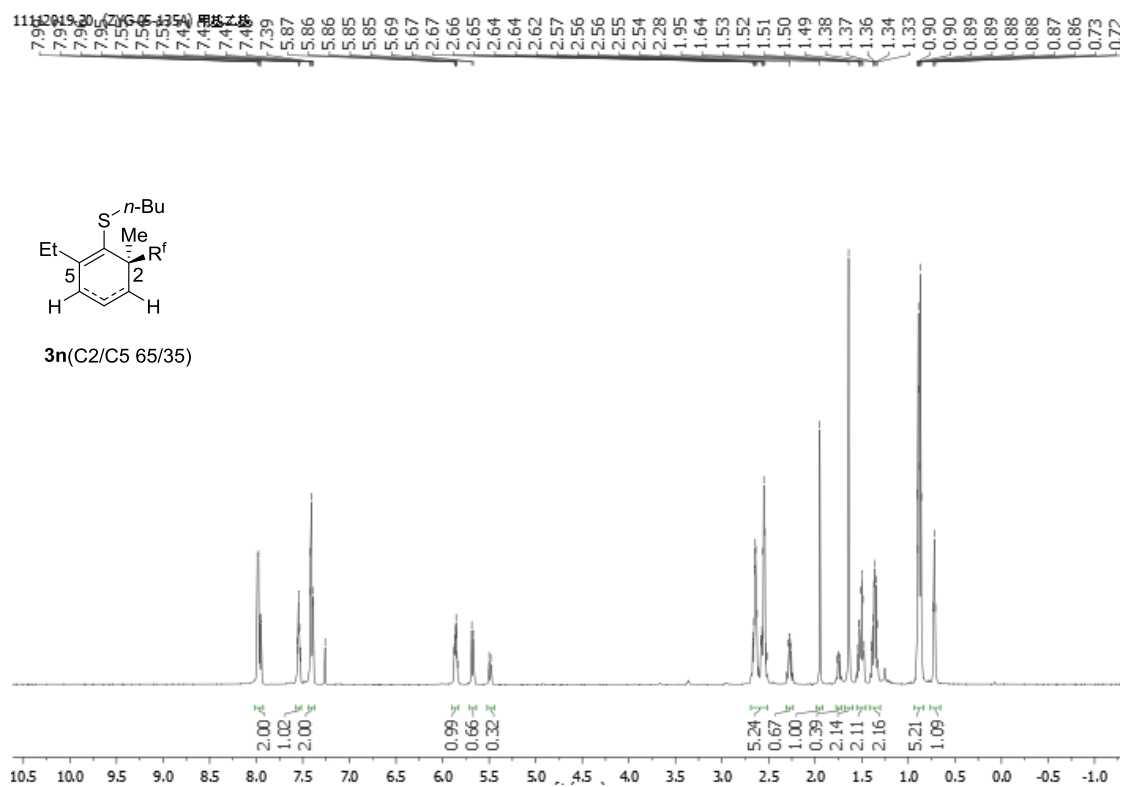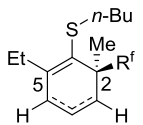

3n(C2/C5 65/35)

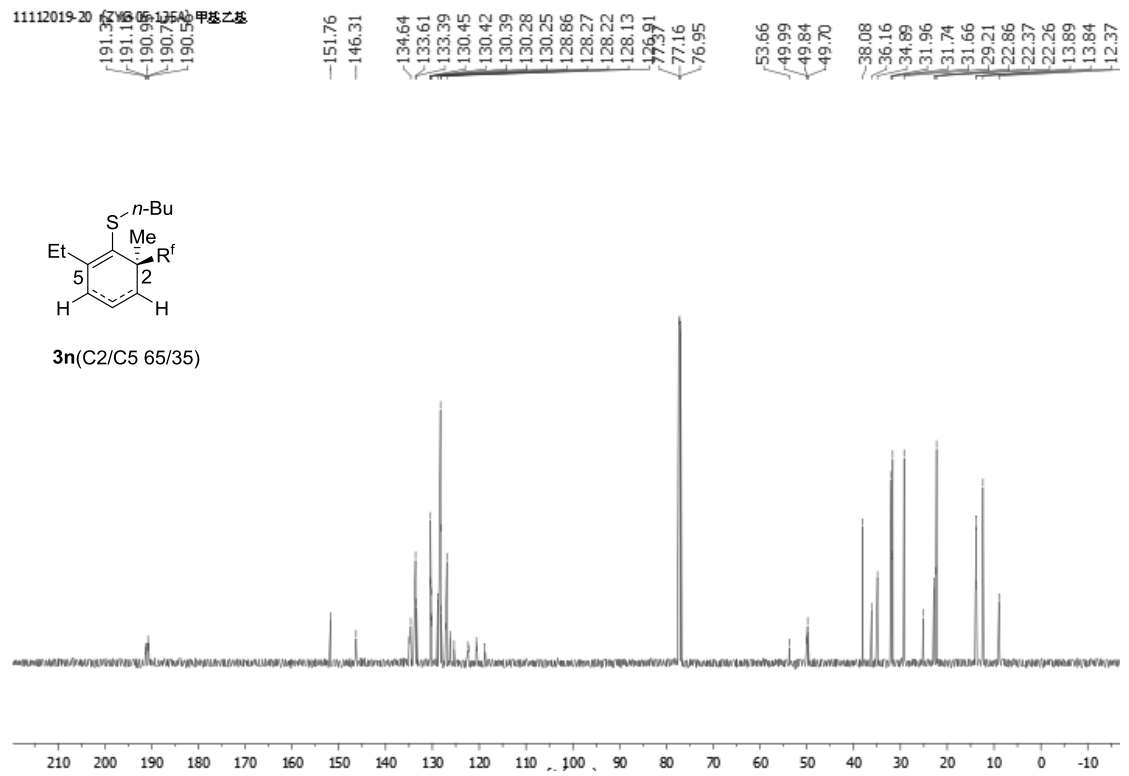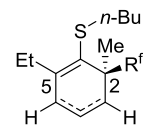

3n(C2/C5 65/35)

-103.03  
-103.48  
-103.64  
-103.71  
-104.09  
-104.16  
-104.33  
-104.78

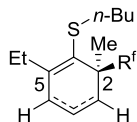

3n(C2/C5 65/35)

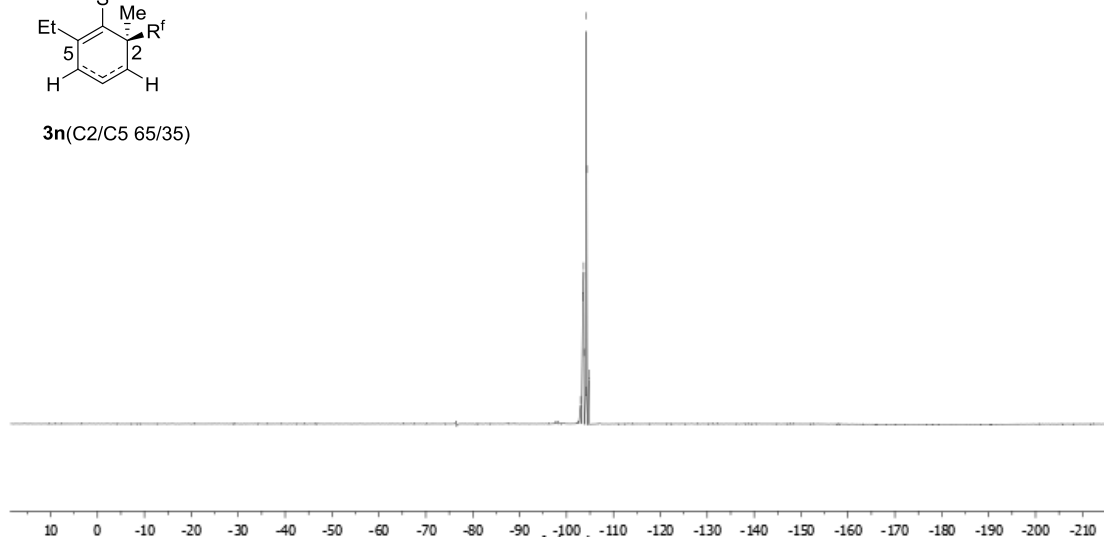

116.28, 8.1, 8.0, 7.9, 7.6, 7.5, 7.4, 7.4, 7.4, 7.3, 7.3, 7.2, 7.2, 7.2, 7.1, 7.1, 7.1, 5.8, 5.8, 5.7, 5.7, 5.7, 2.9, 2.9, 2.8, 2.8, 2.8, 2.8, 2.1, 2.1, 2.1, 2.1, 2.0, 2.0, 2.0, 1.7, 1.7, 1.5, 1.5, 1.1, 1.1, 1.1, 1.1, 1.0, 1.0, 1.0, 0.7, 0.7

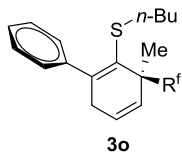

3o

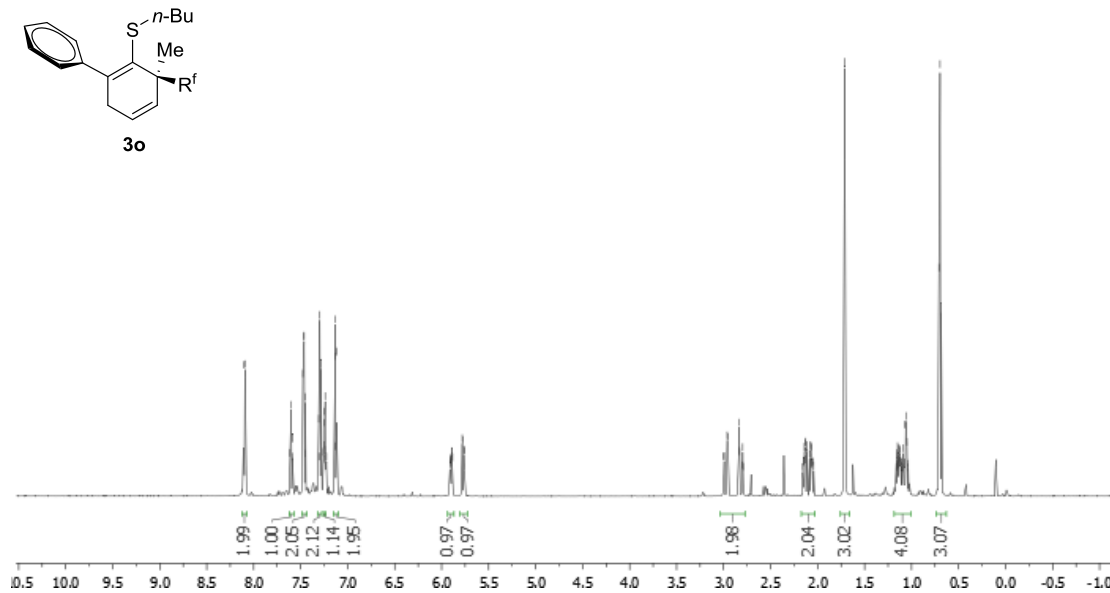

11072019-18 ZYG-05-132M 甲苯苯基

190.85  
190.61  
190.4

147.07  
142.63  
133.71  
130.46  
130.43  
130.40  
129.71  
128.66  
128.49  
128.09  
127.99  
127.73  
127.11  
126.85  
77.16  
76.95

49.59  
49.44  
49.30  
36.23  
36.19  
31.20  
22.51  
21.85  
13.64

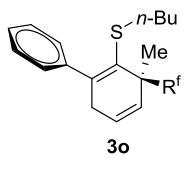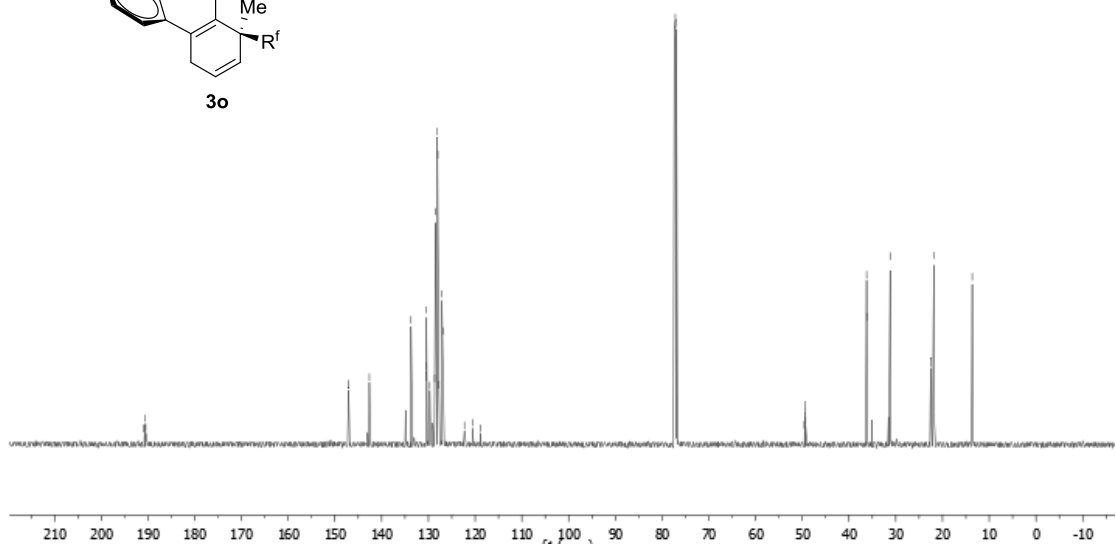

11072019-18 ZYG-05-132M 甲苯苯基

103.54  
104.00  
104.22  
104.67

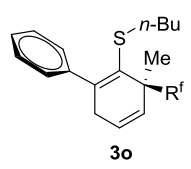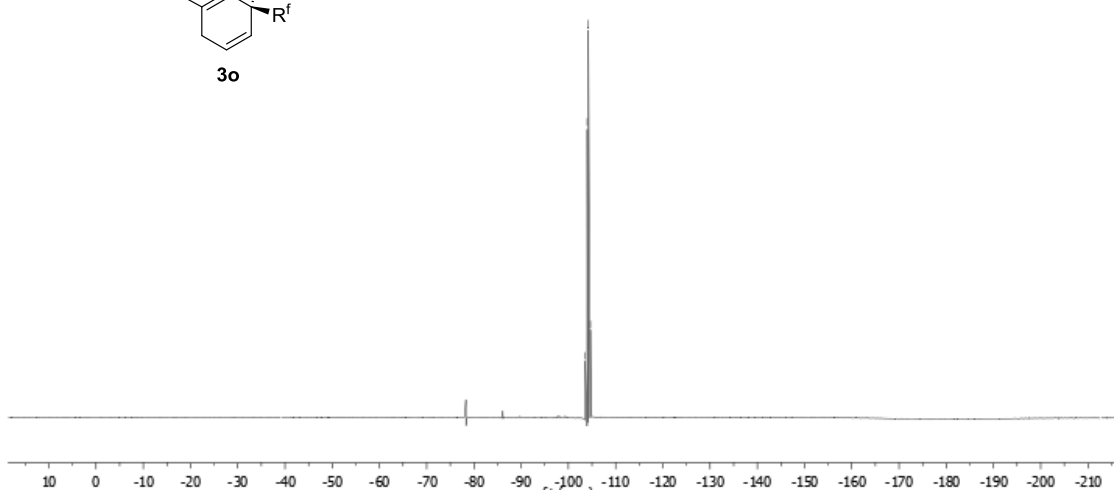

11082019-88 (ZYG-05-132G) 甲基干酪

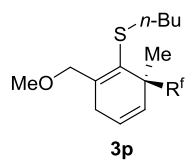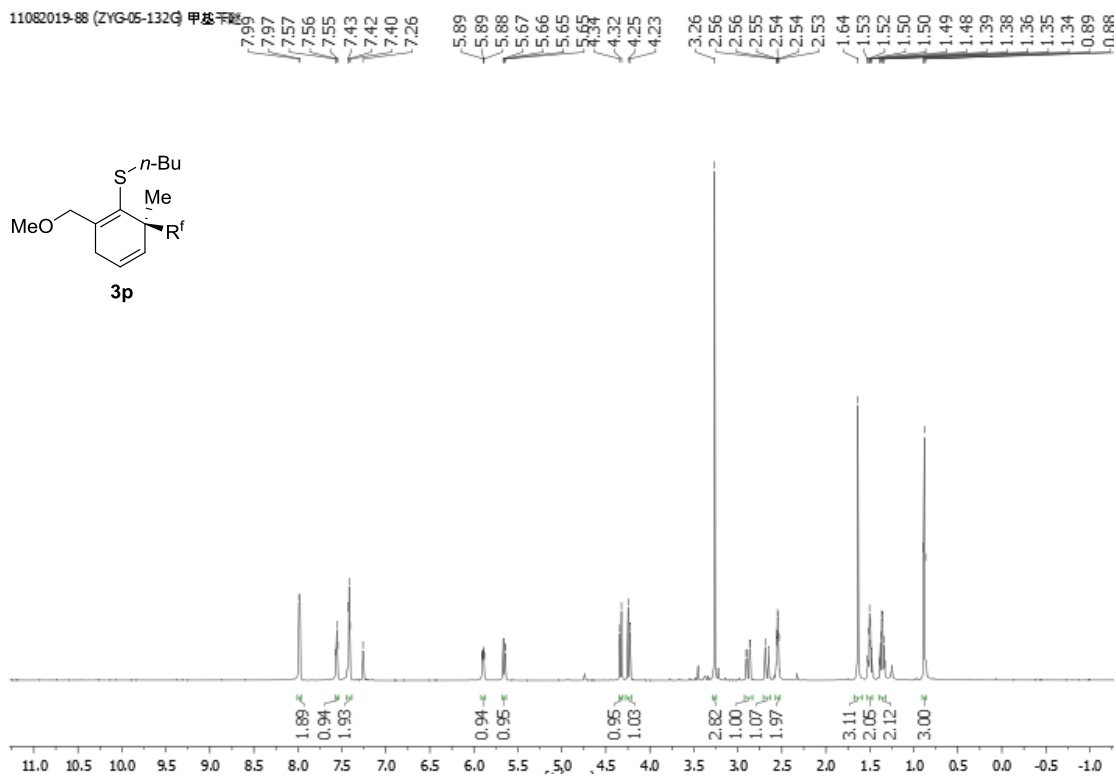

11112019-19

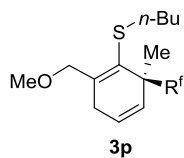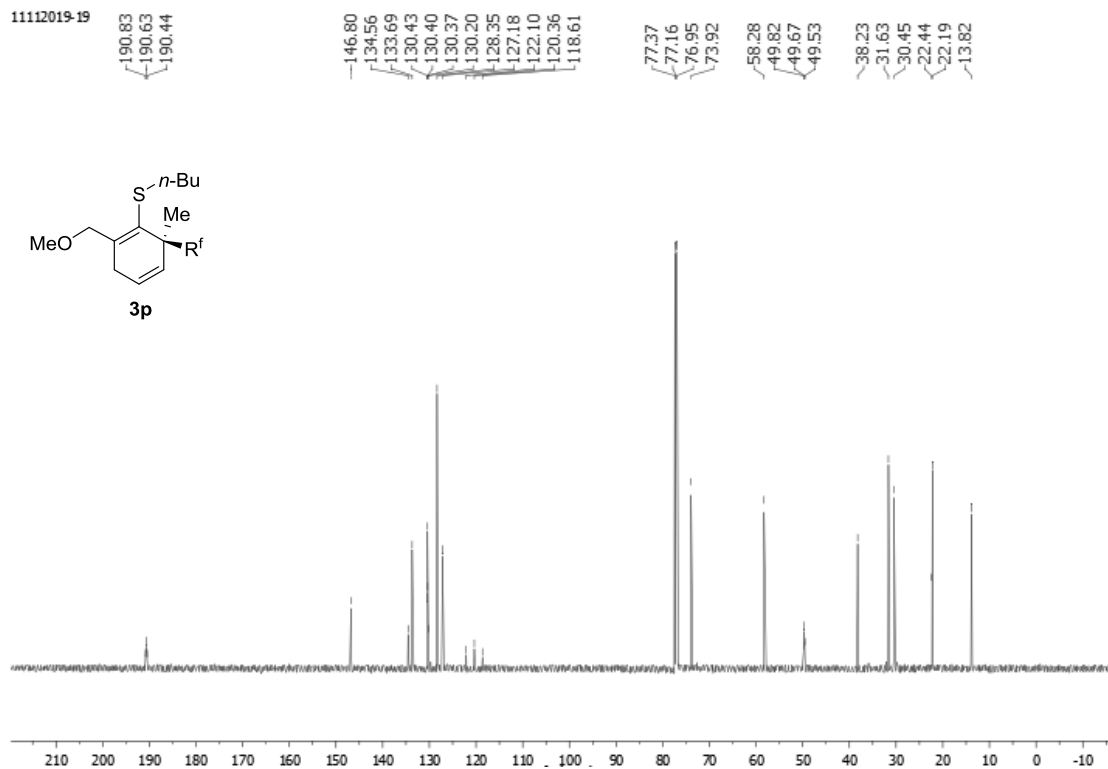

11082019-88 (ZYG-05-132G) 甲基干醇

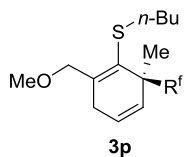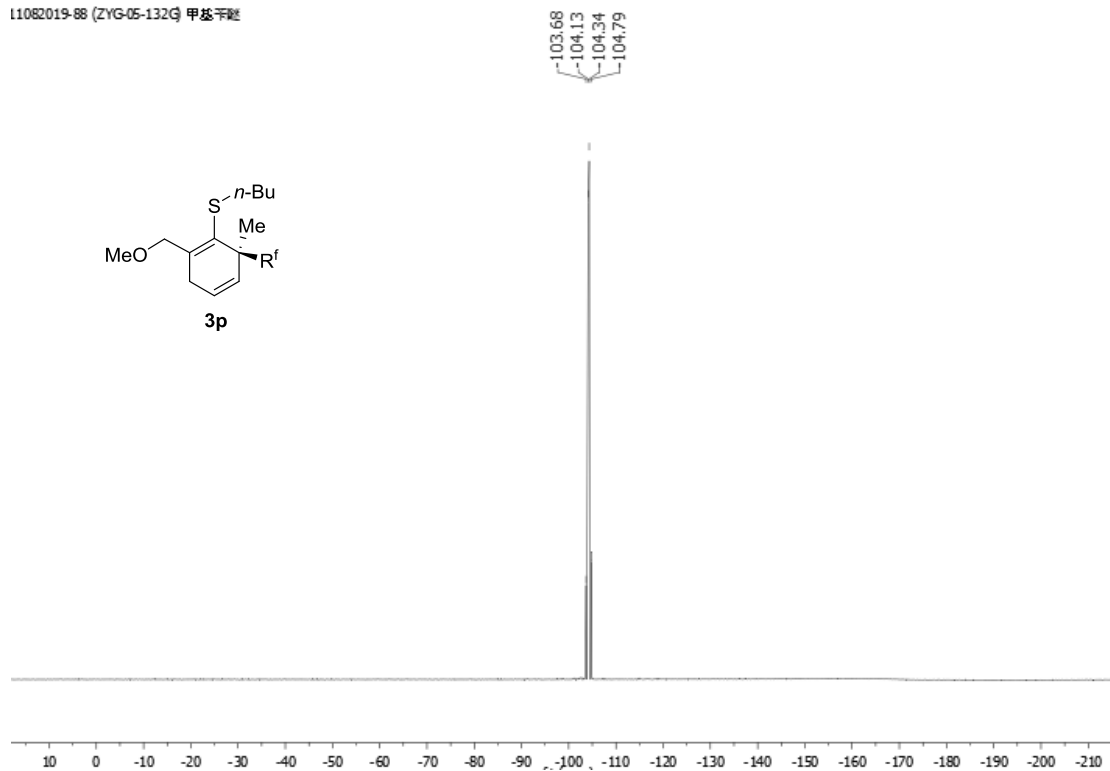

11152019-69 (ZYG-05-136G) 甲基干醇

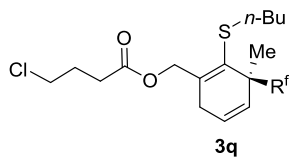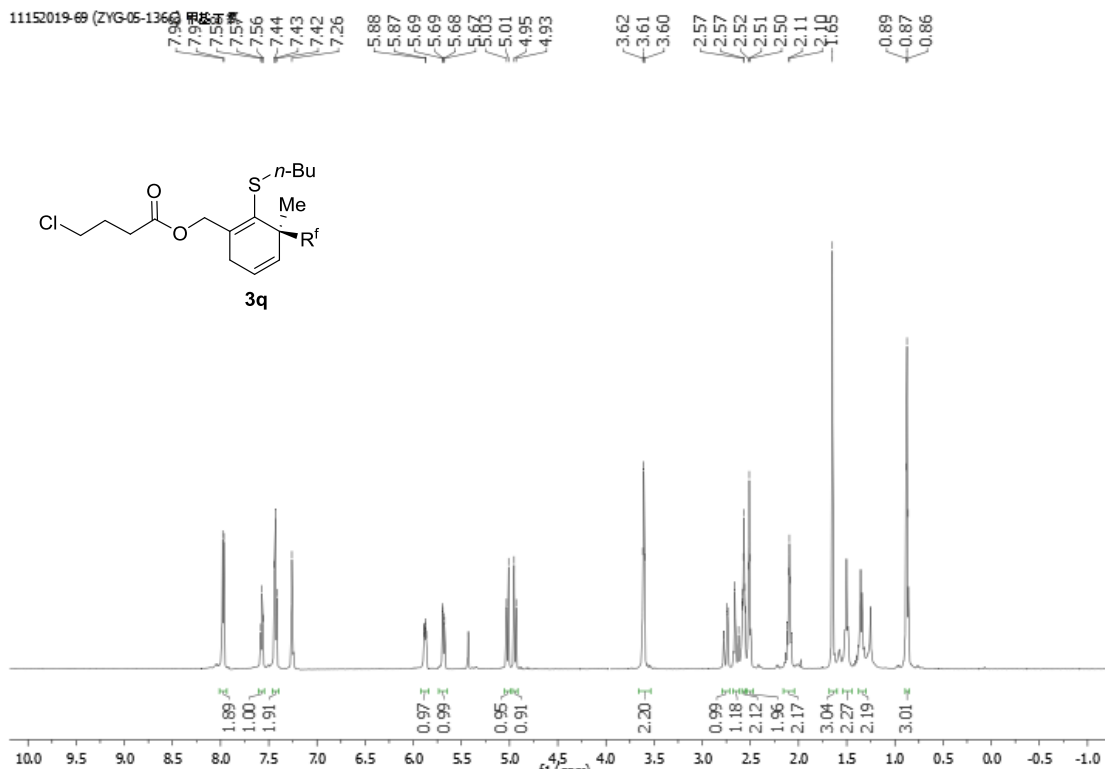

11152019-72

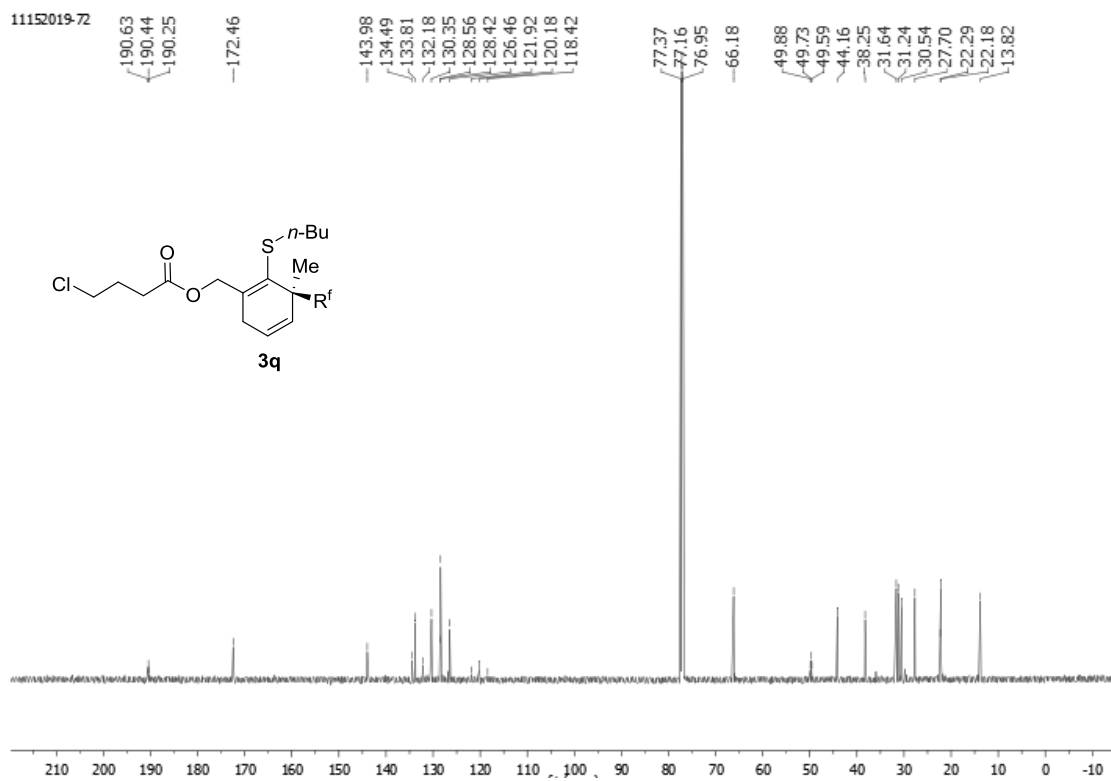

11152019-72

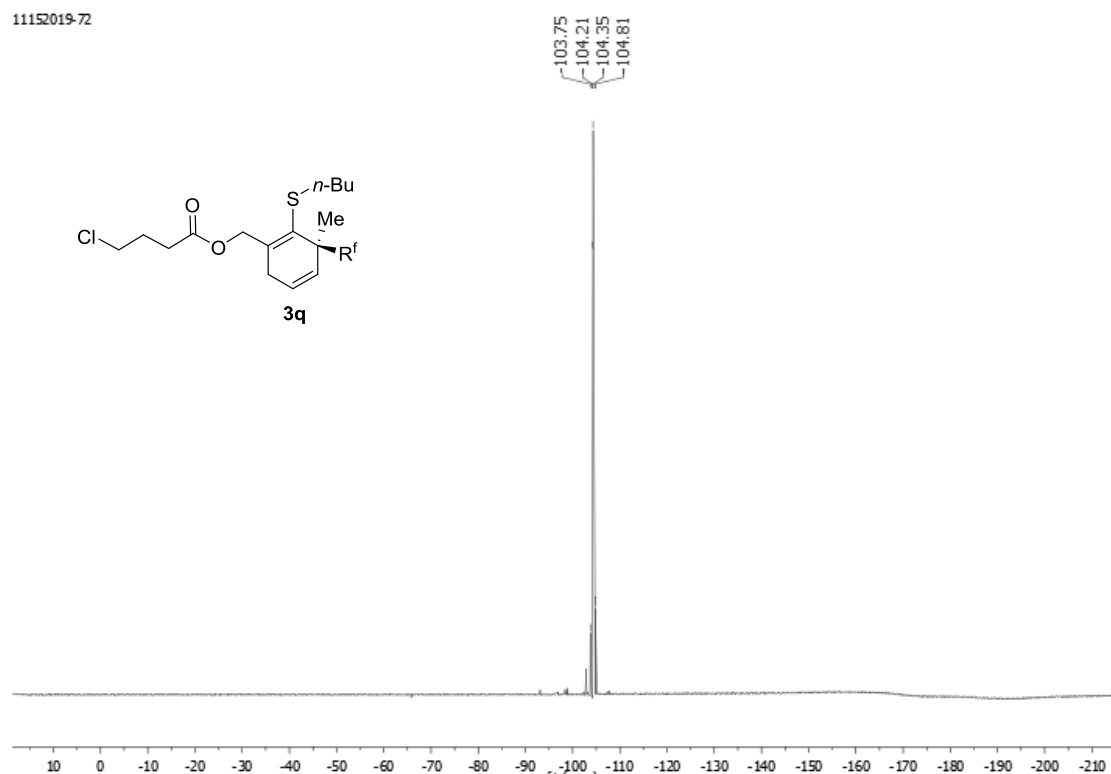



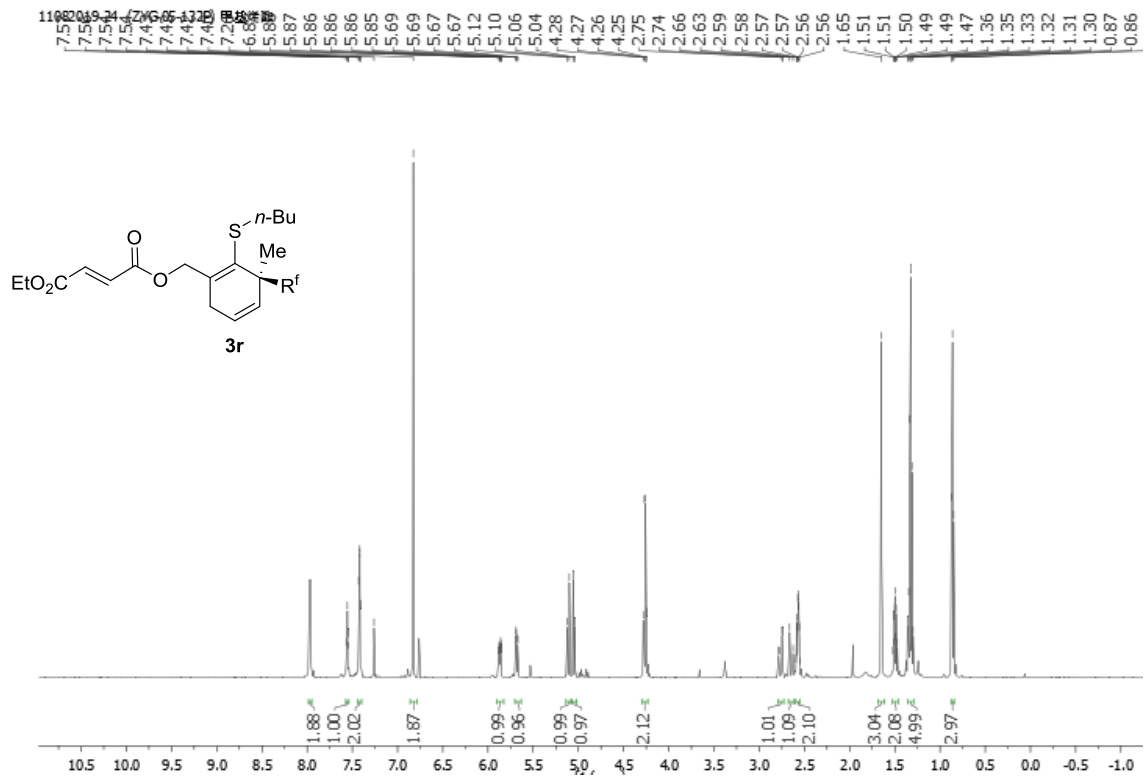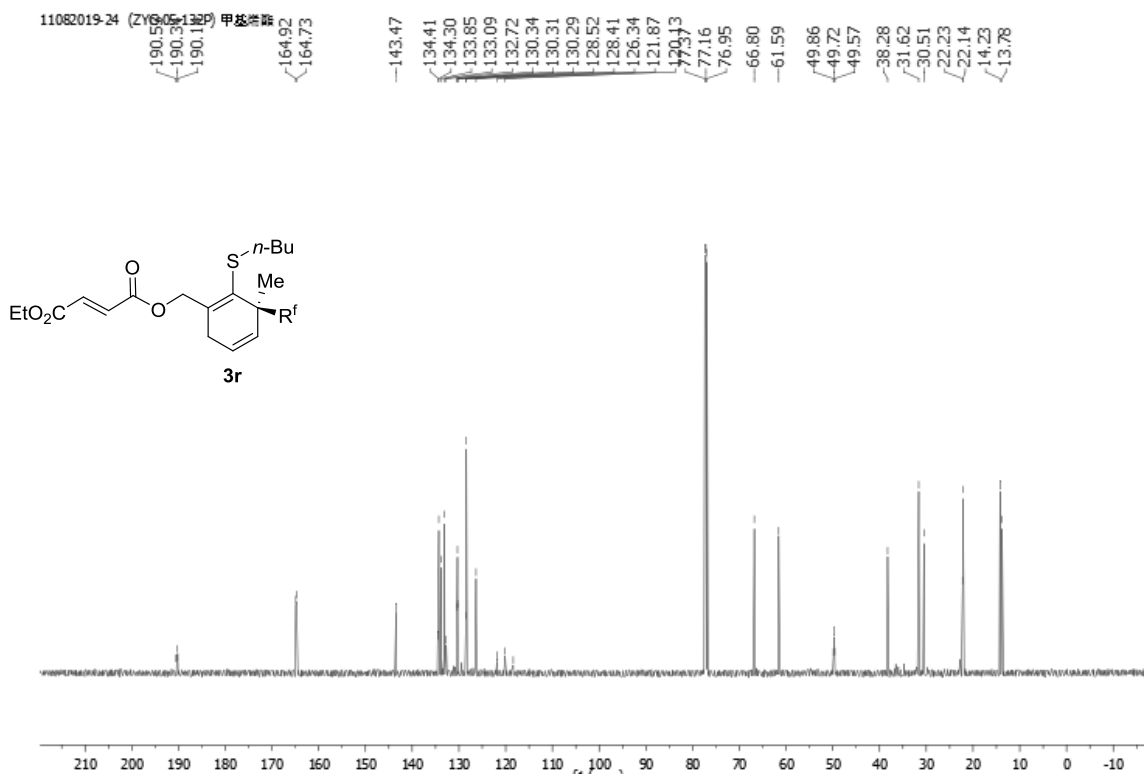

11082019-24 (ZYG-05-132P) 甲基苯胺

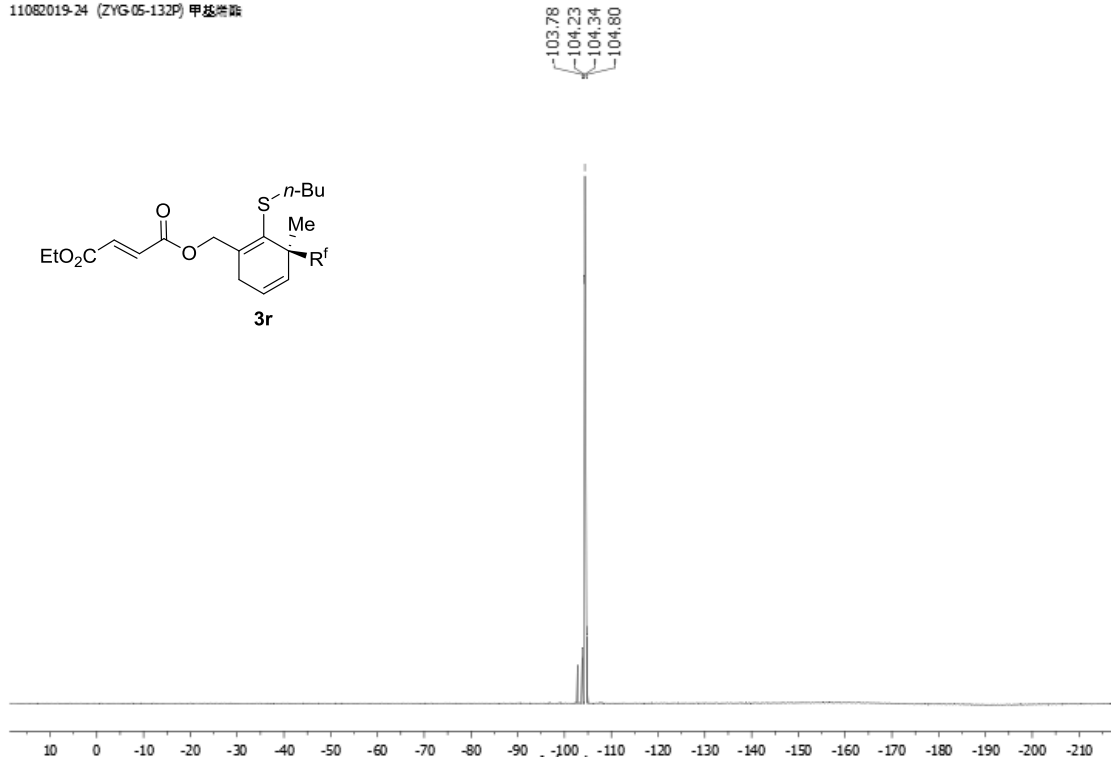

12162019-25 zyg-05-161C

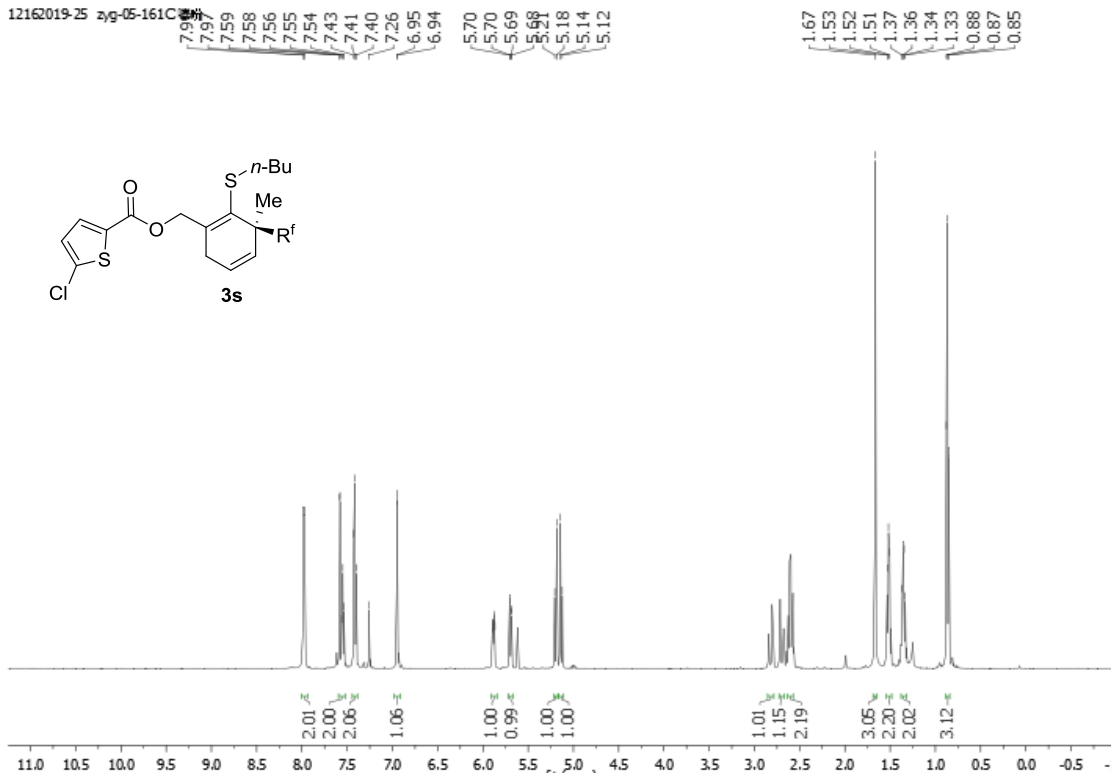

12162019-25 zy-05-161C 谱图

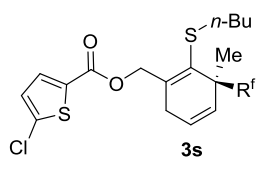

160.92  
143.79  
137.83  
134.46  
133.83  
133.39  
132.40  
131.45  
130.32  
130.30  
130.27  
128.51  
128.42  
127.50  
126.40  
121.90  
120.16  
118.41  
77.37  
77.16  
76.95  
66.68  
49.88  
49.74  
49.60  
38.24  
31.66  
30.50  
22.24  
22.16  
13.80

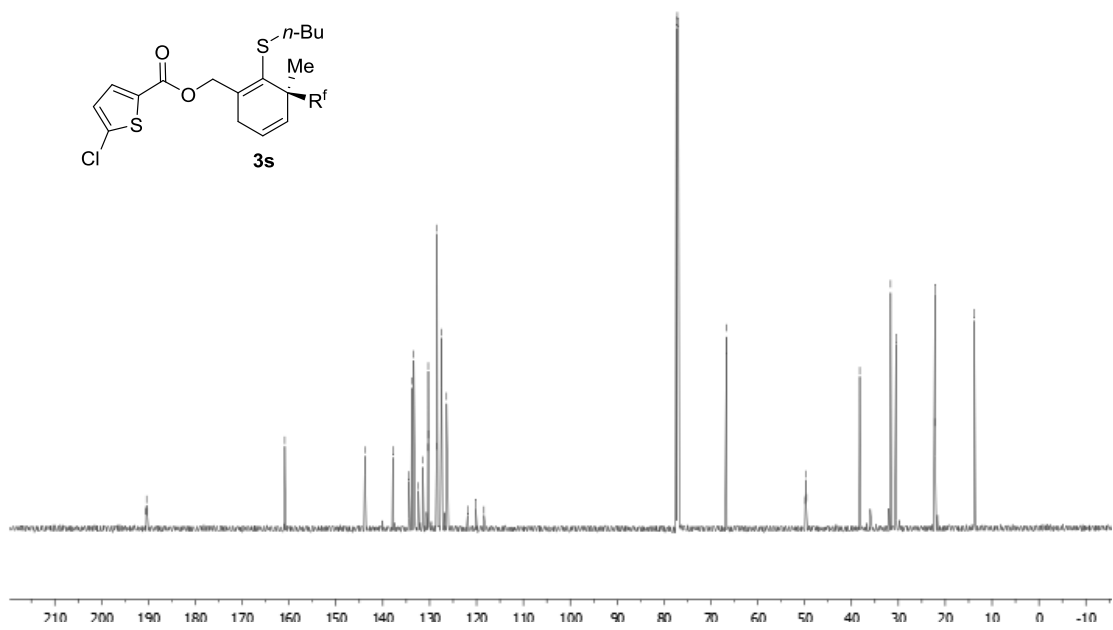

12162019-25 zy-05-161C 谱图

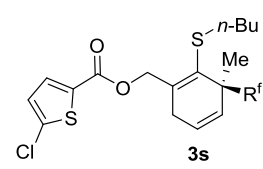

103.82  
104.27  
104.42  
104.88

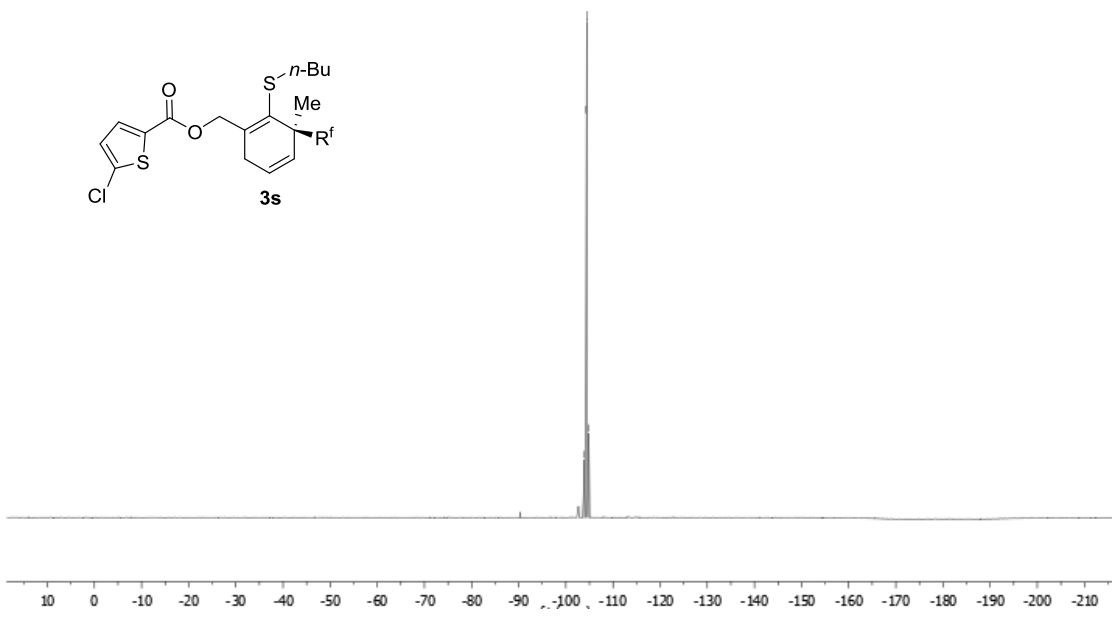

11062019-55 ZYG-5-132-2 甲苯

7.98  
7.97  
7.58  
7.55  
7.57  
7.46  
7.45  
7.43  
7.26

3.03  
3.02  
2.79  
2.78  
2.76  
1.64  
1.52  
1.51  
1.38  
1.37  
0.88  
0.87

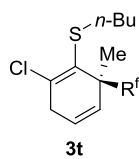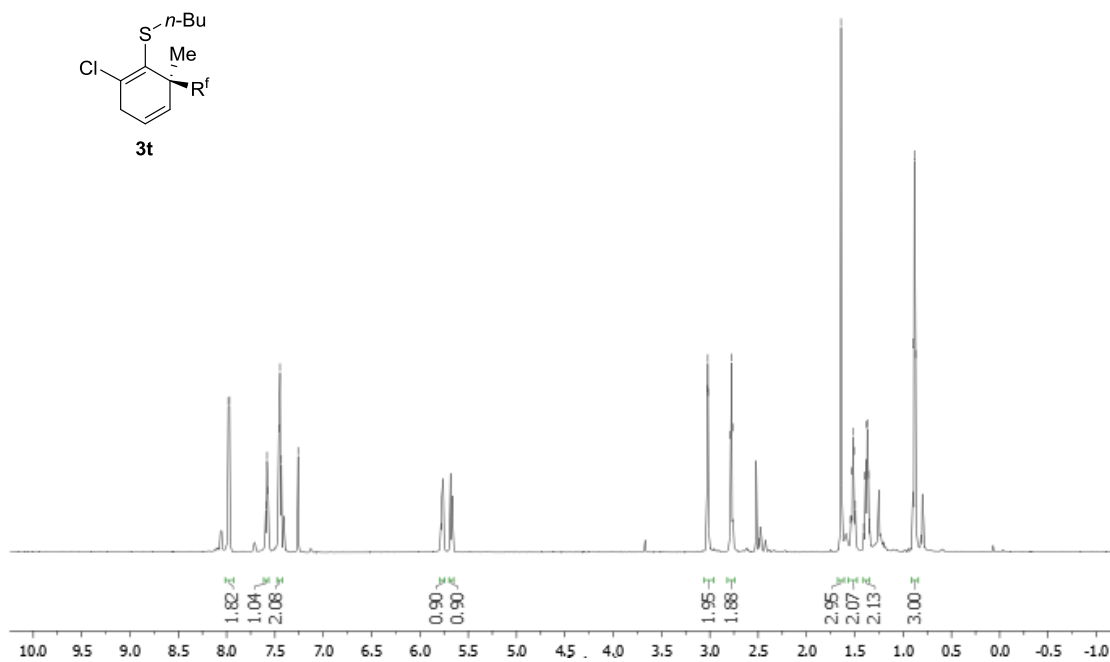

11062019-55 ZYG-5-132-2 甲苯

190.36  
190.13  
190.02

142.36  
134.28  
133.89  
130.32  
130.29  
130.27  
128.52  
128.35  
125.85  
121.33  
119.58  
117.83

77.37  
77.16  
76.95

51.27  
51.13  
50.98  
37.21  
35.71  
31.51  
22.40  
22.20  
13.84

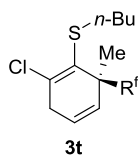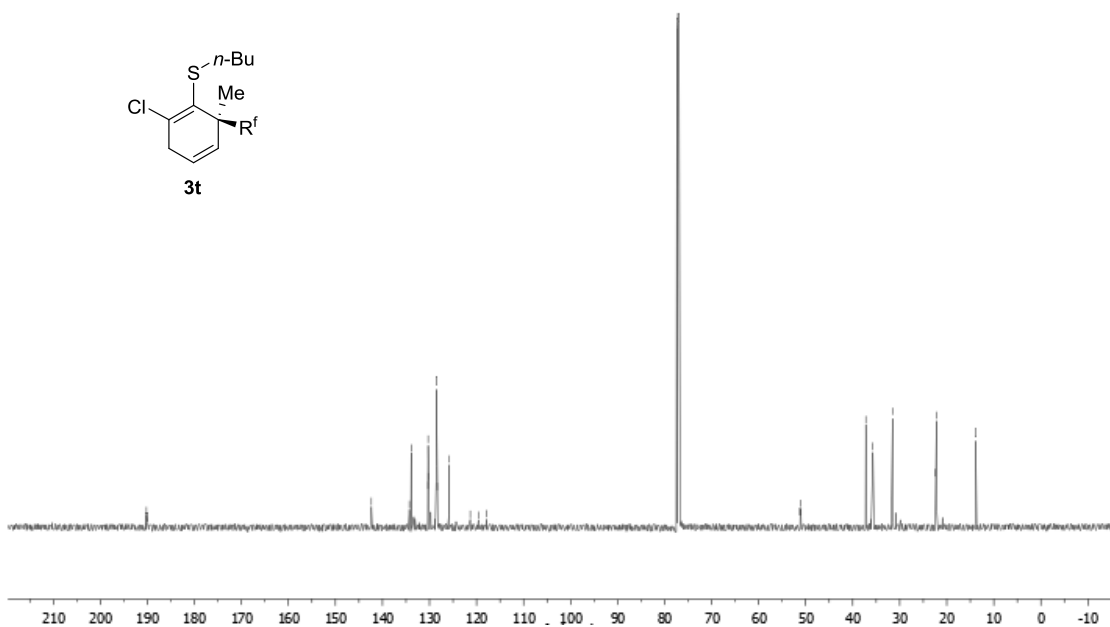

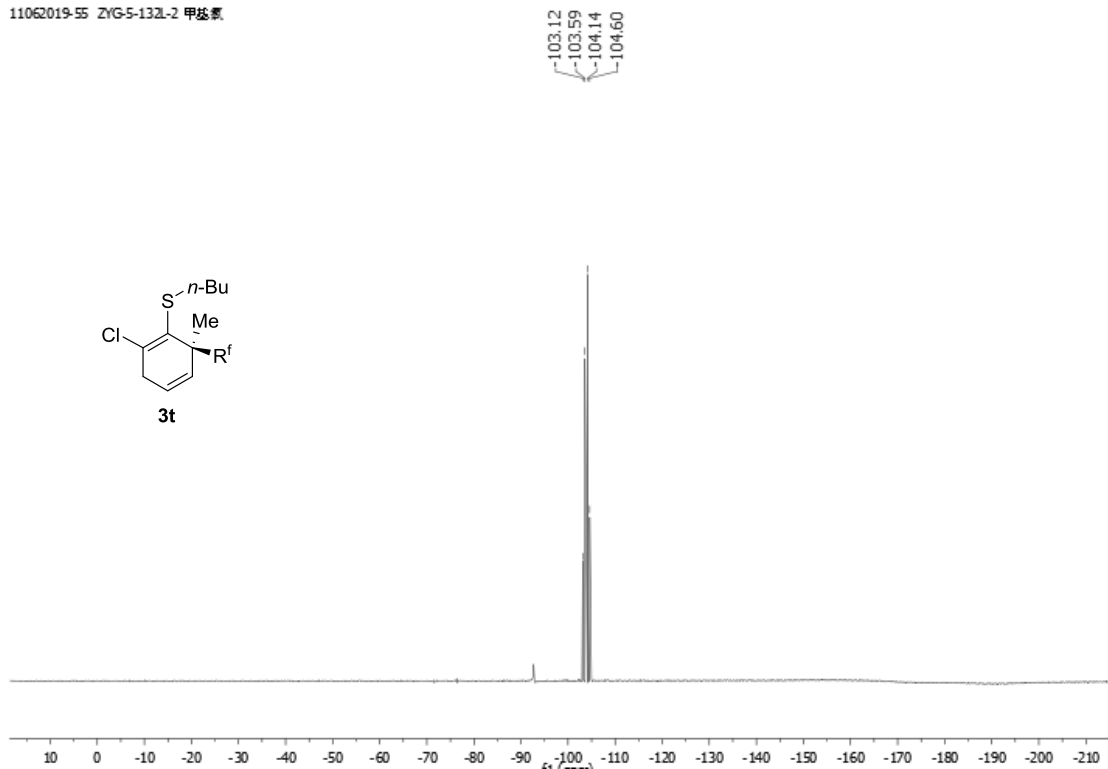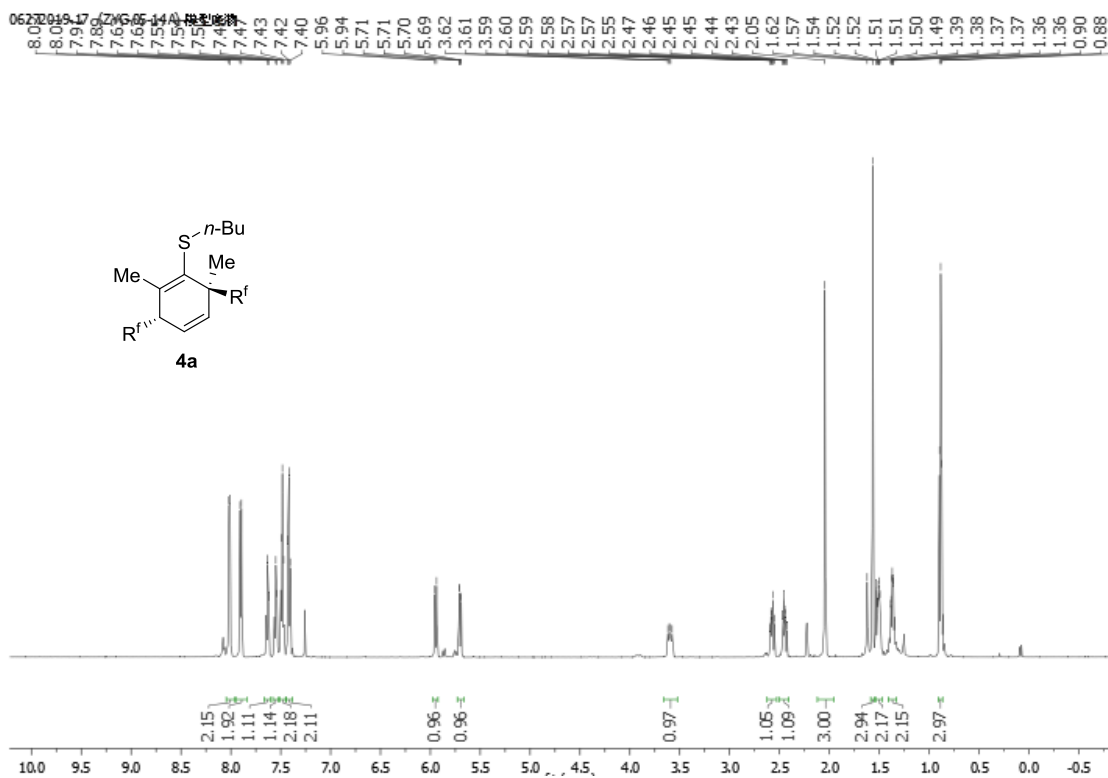

06272019-17 (Z)-6-14 雜種物

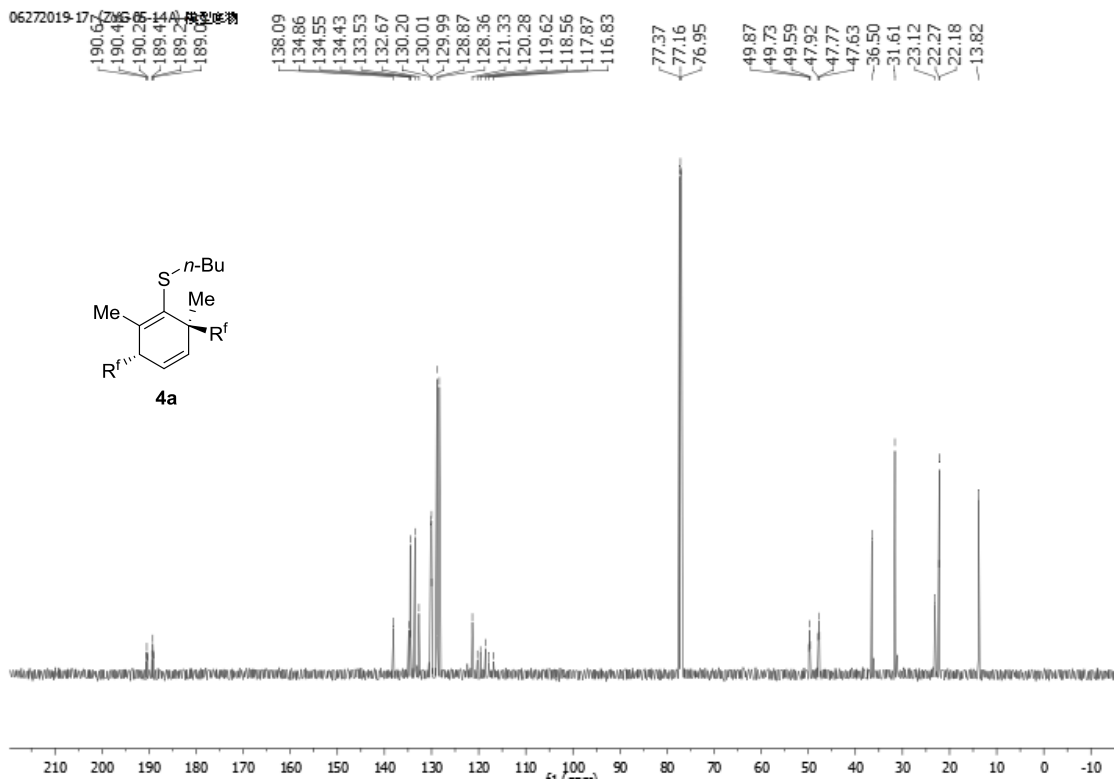

07012019-11 F

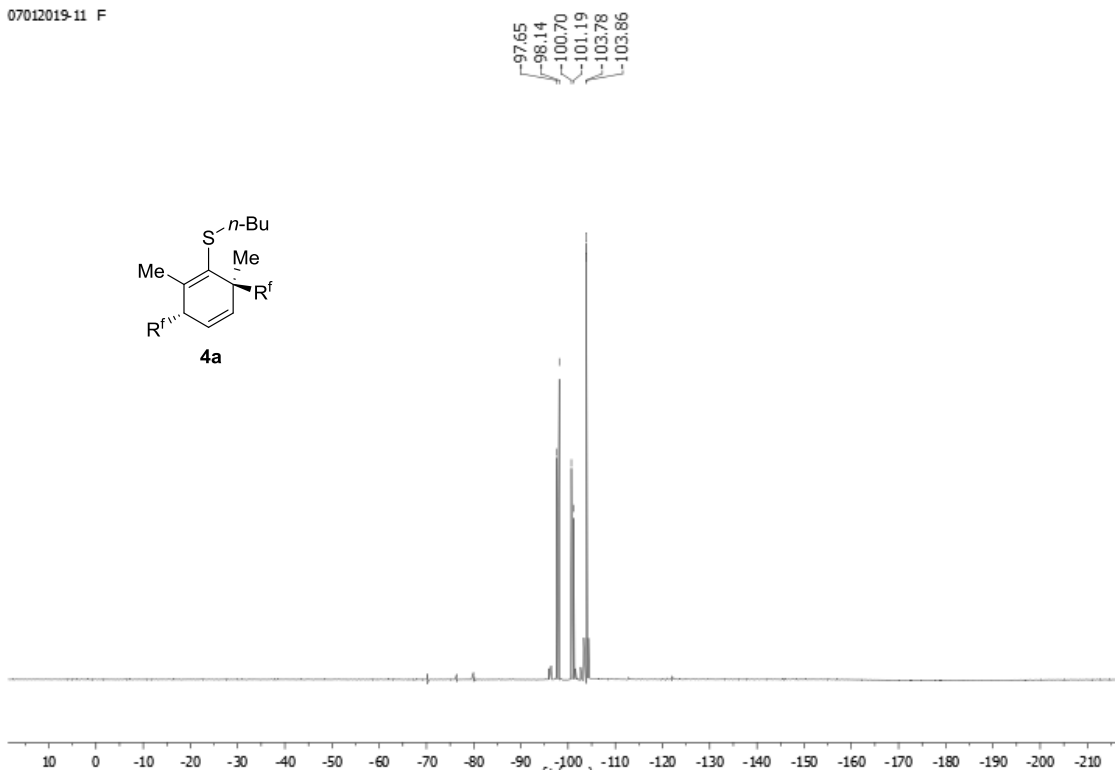

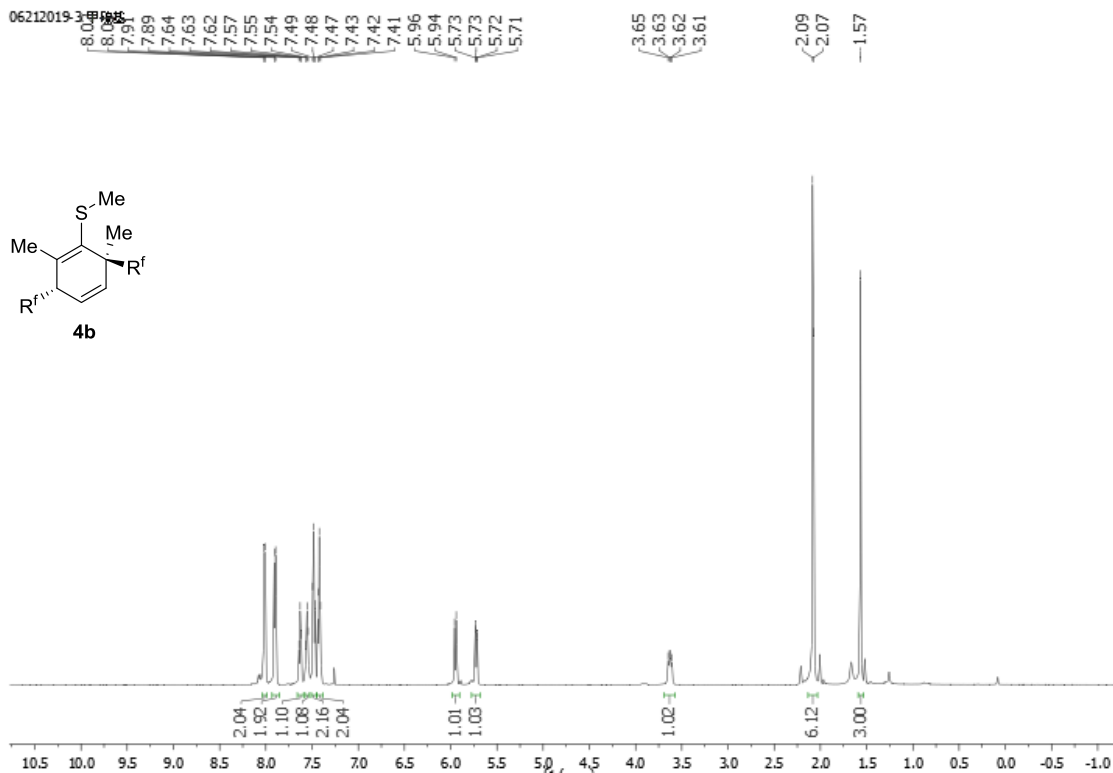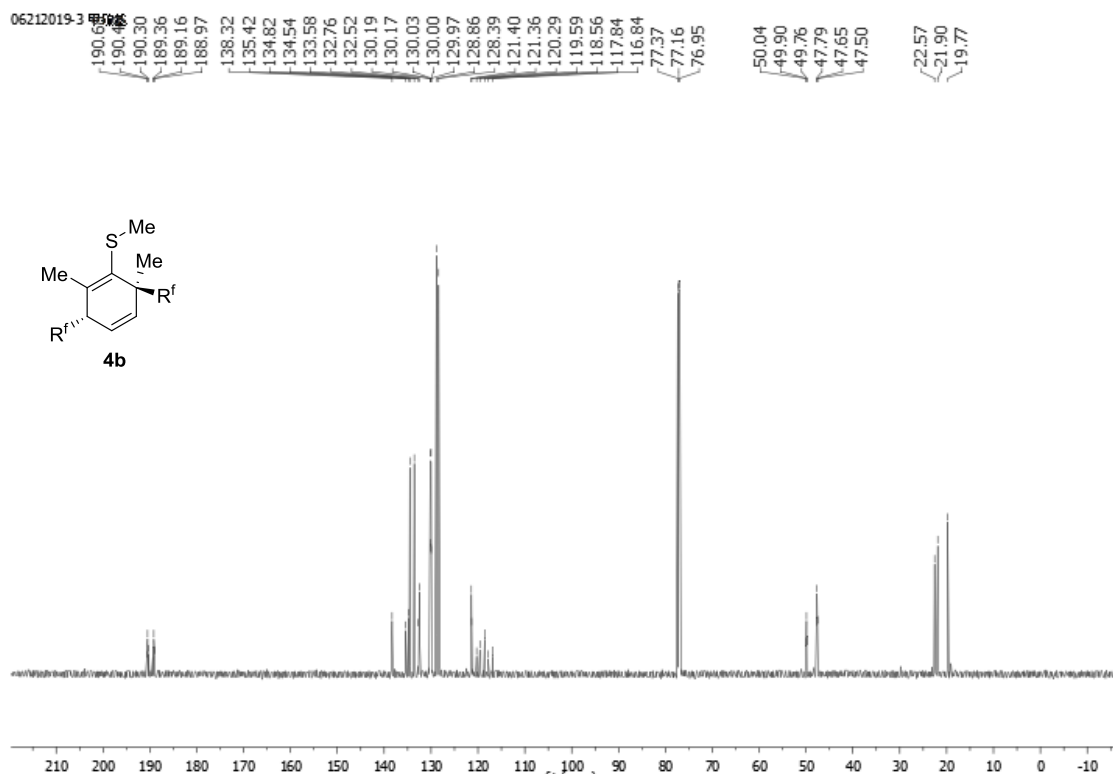

06212019-3 甲基基

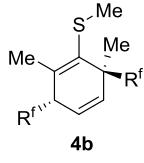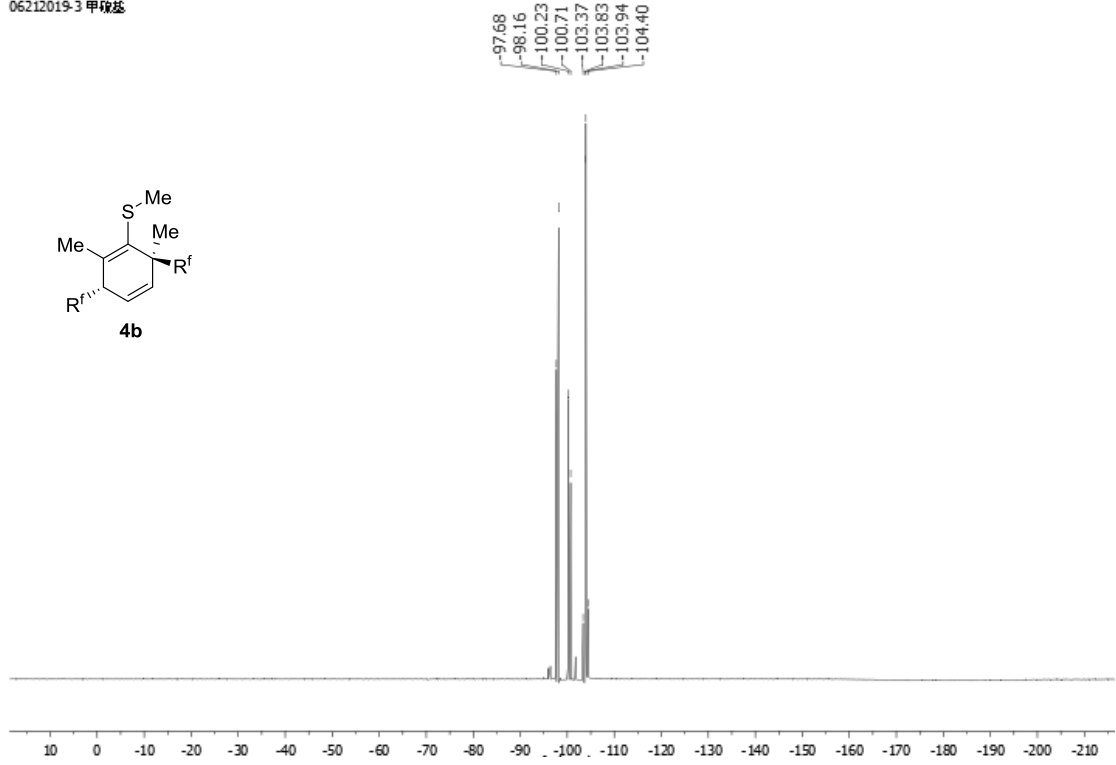

10162019-3 (716054126) 甲基基基基

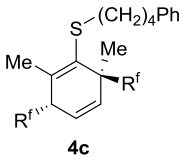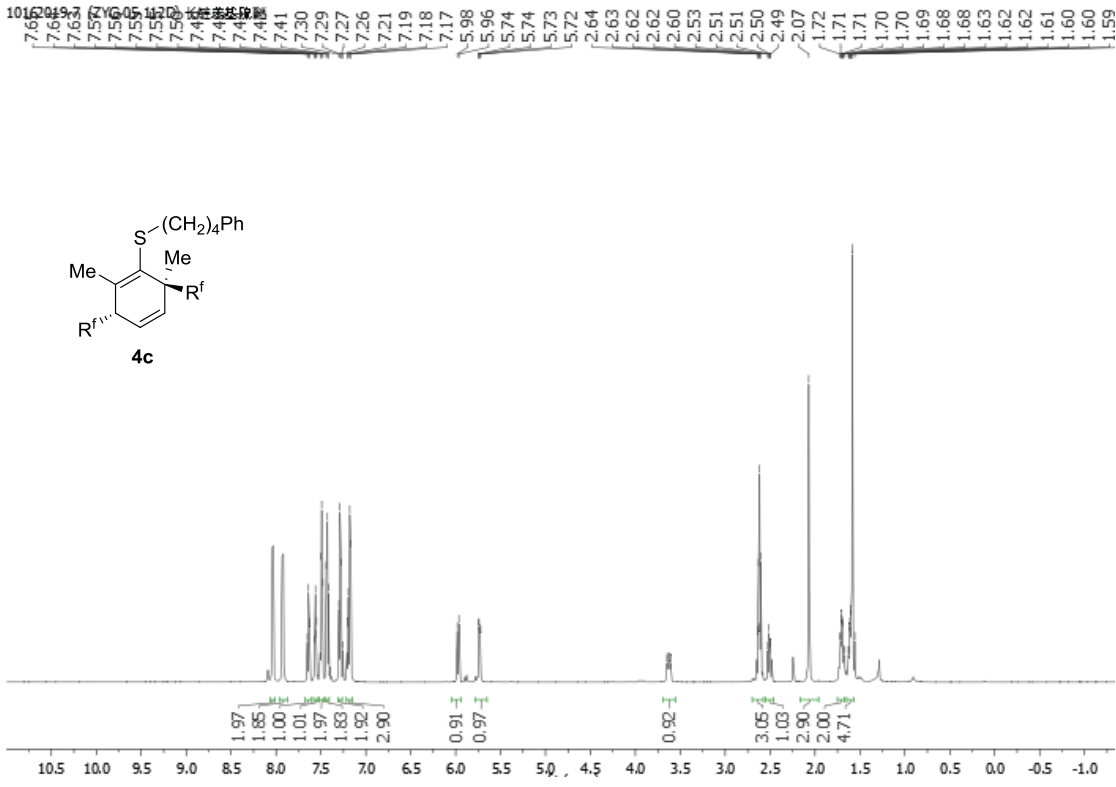



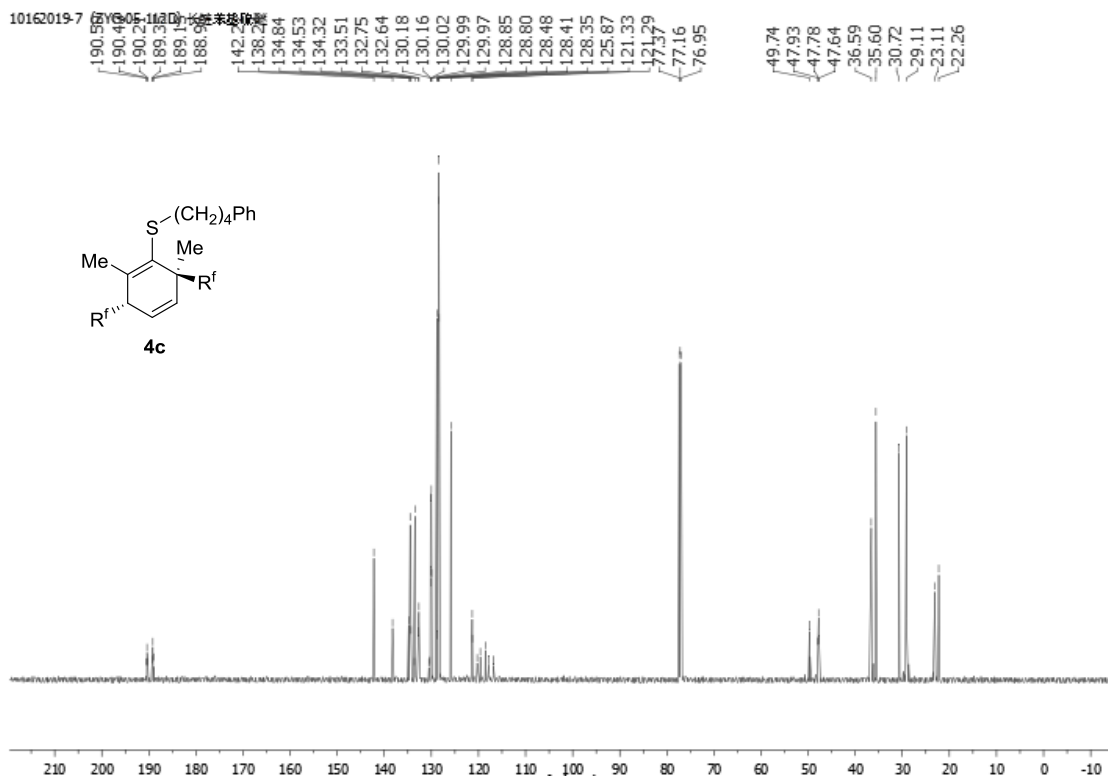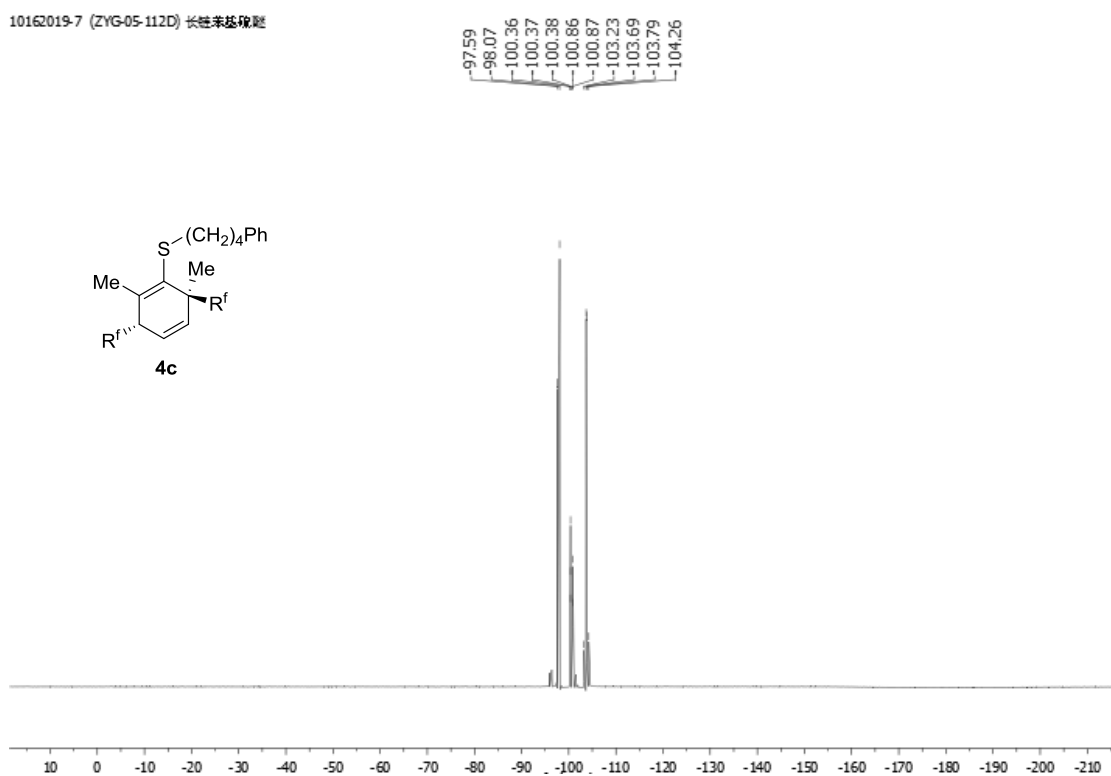

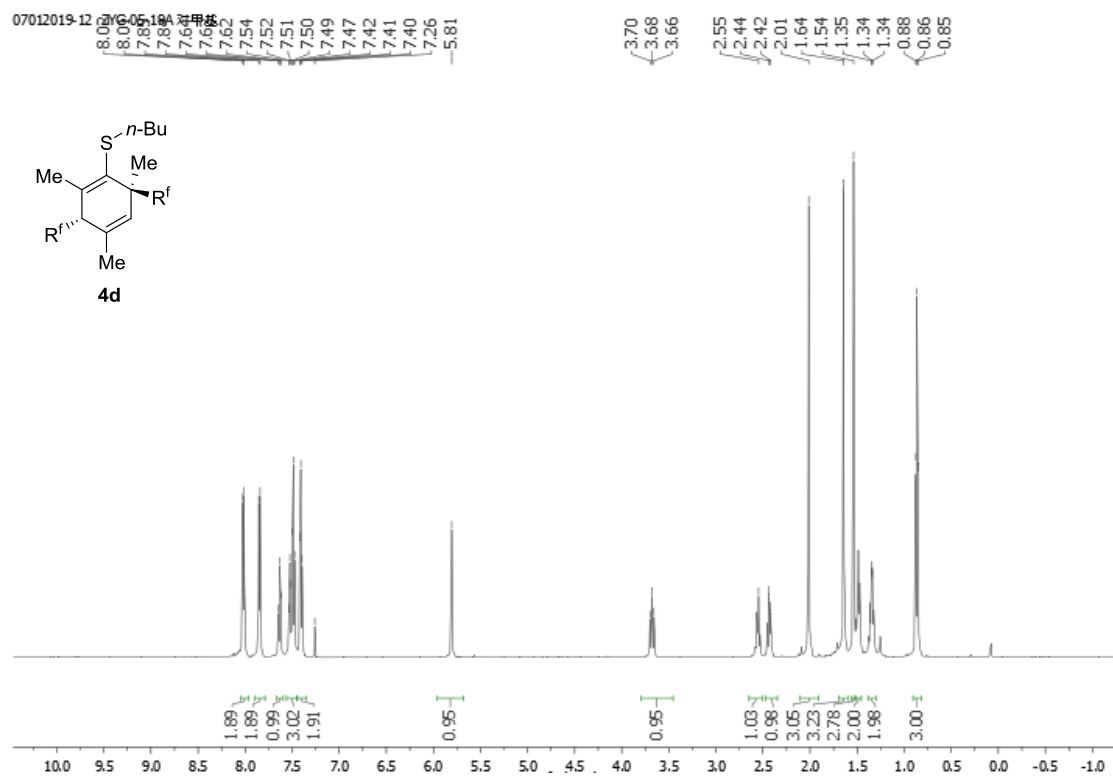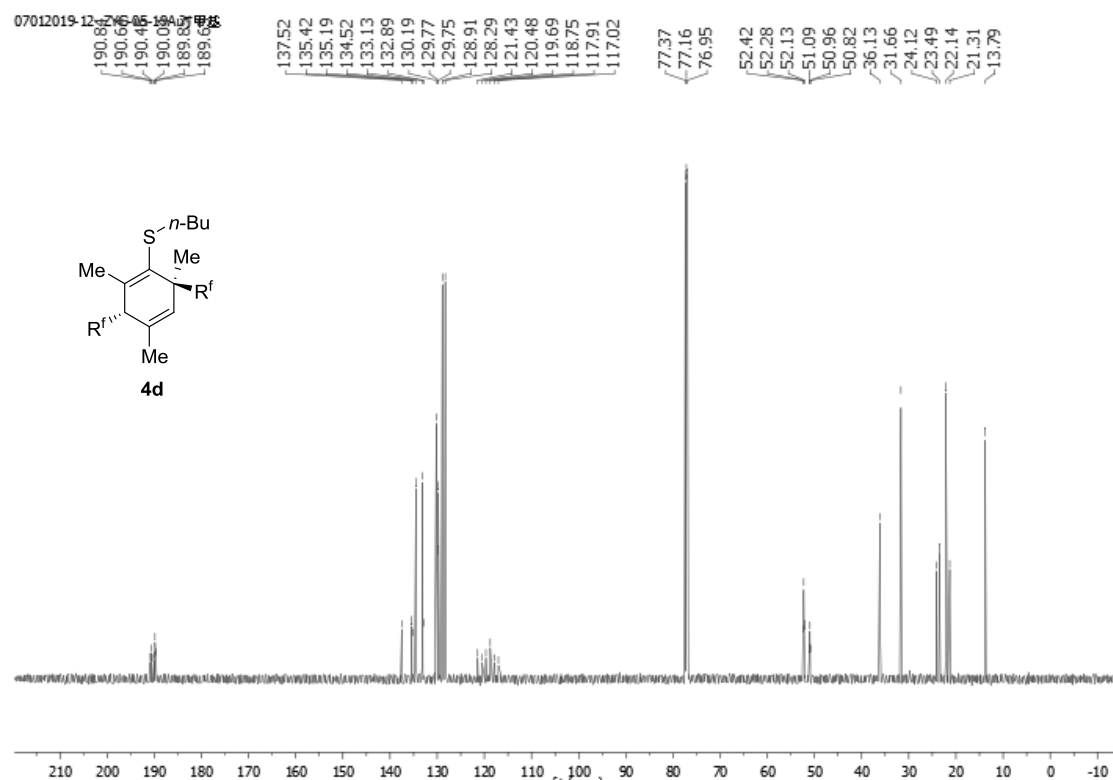

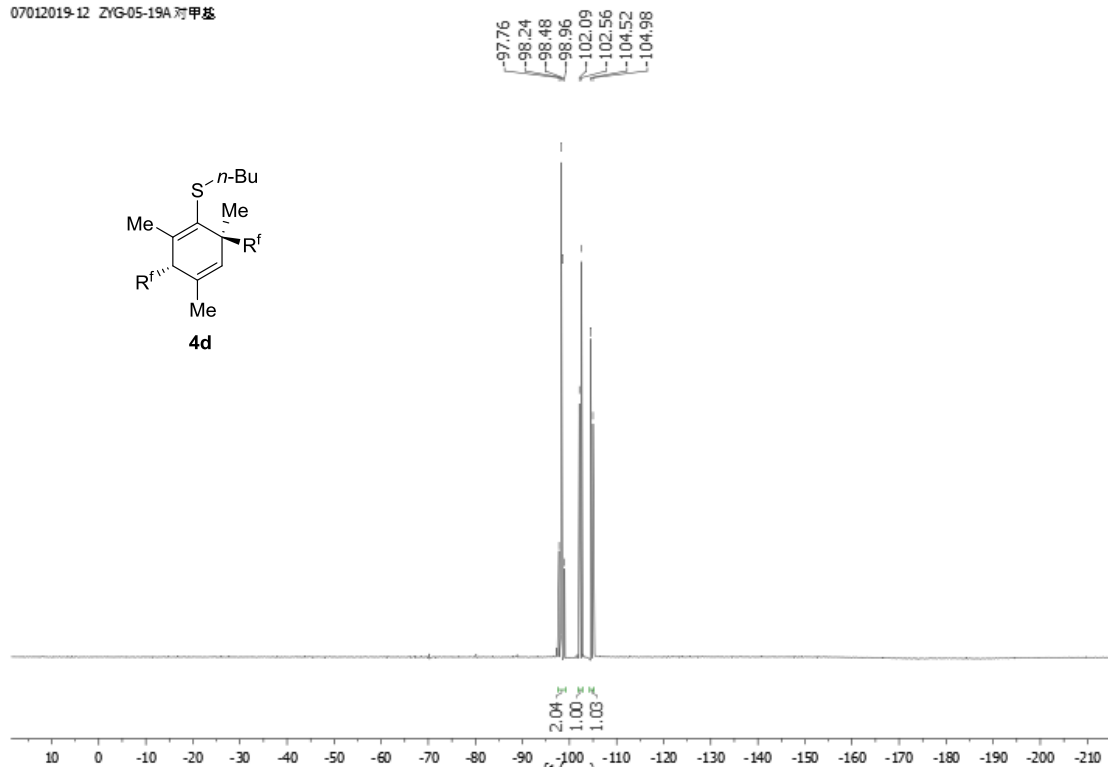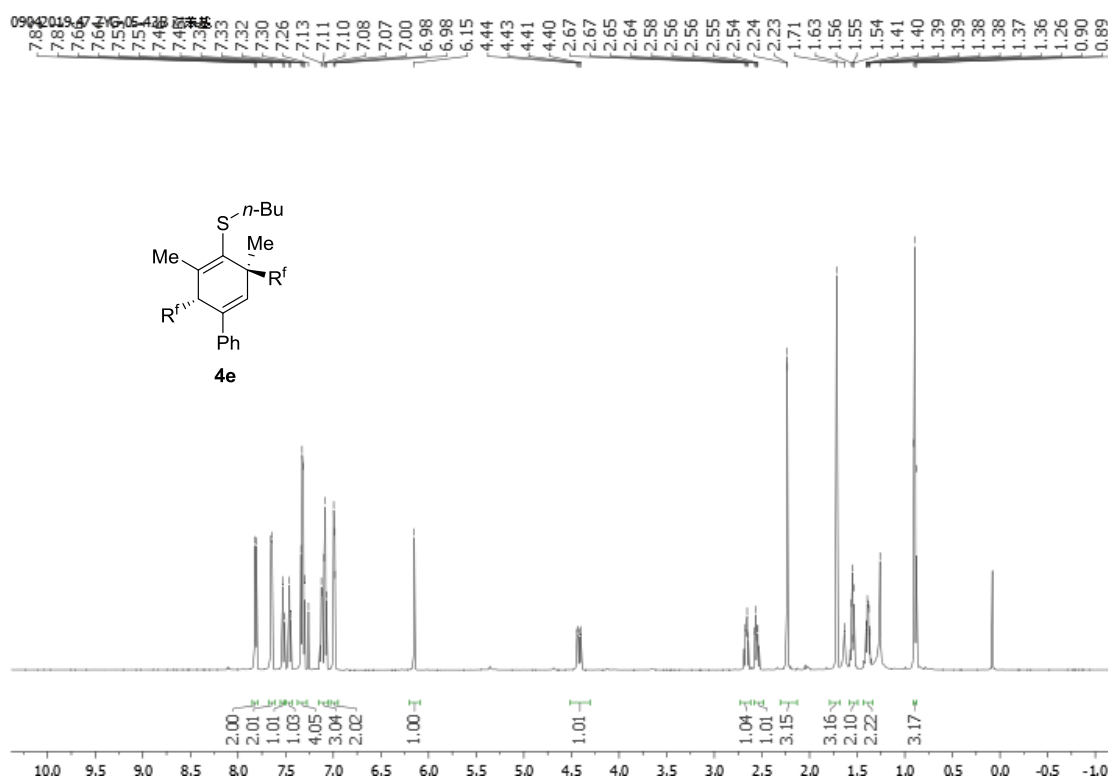

09042019-47

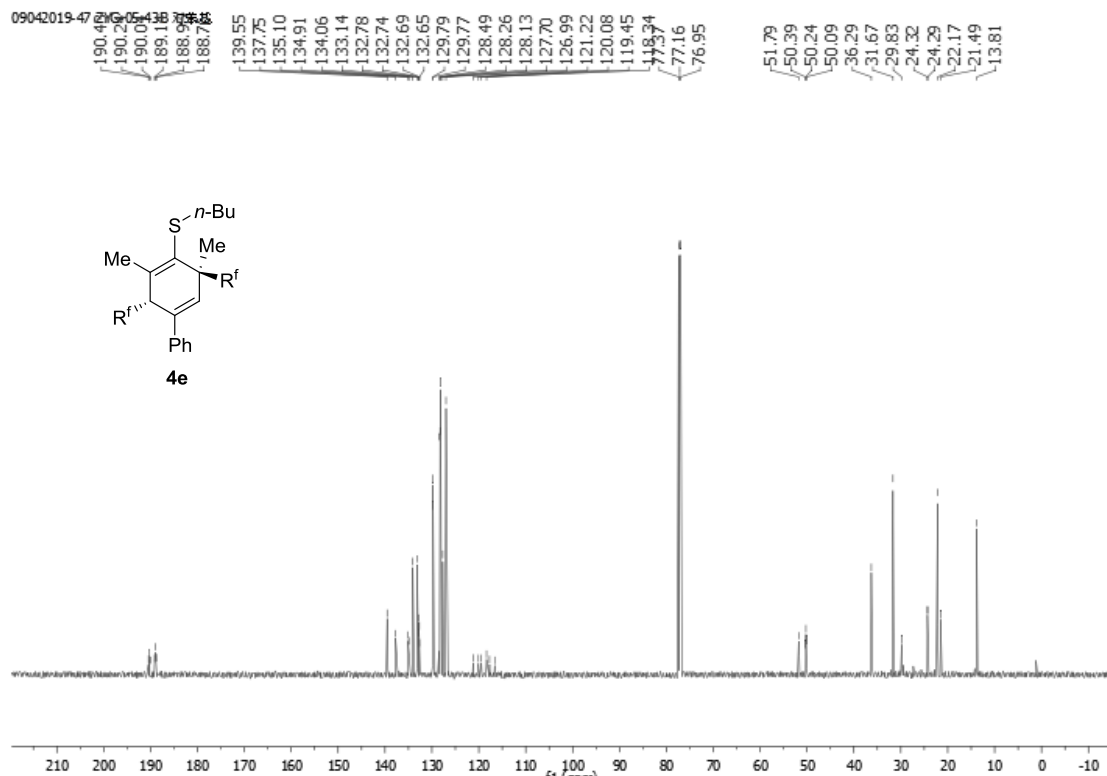

09042019-47 ZYG-05-43B 对苯基

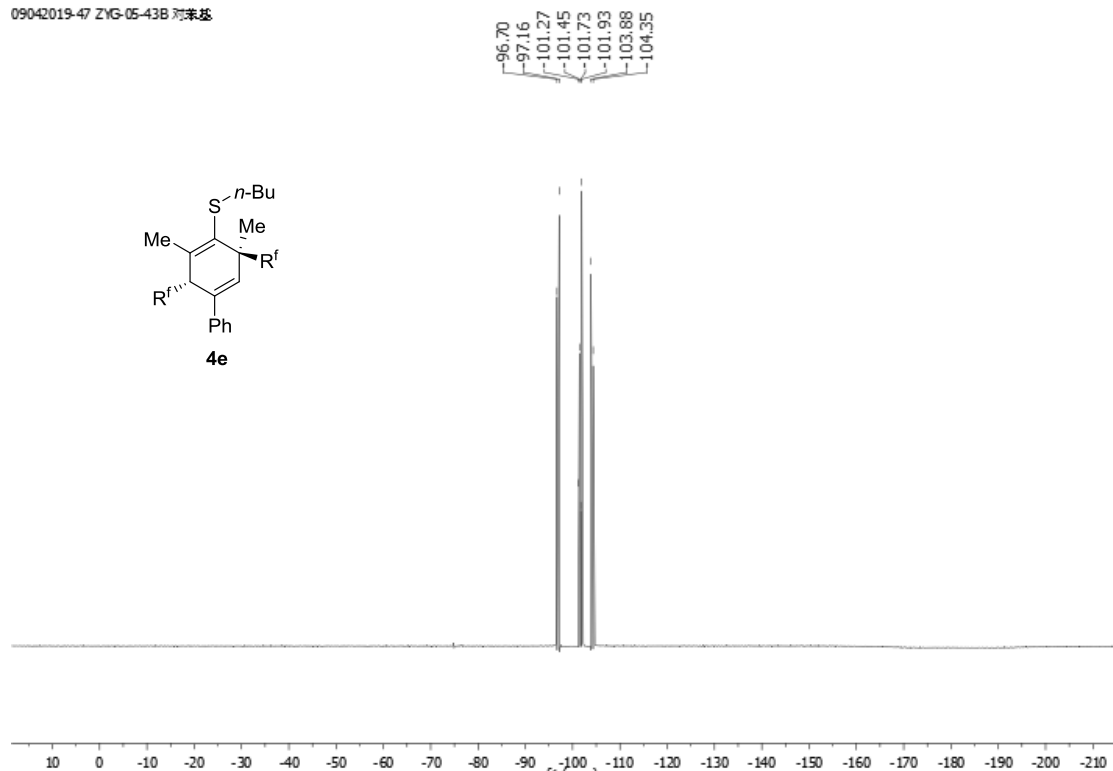

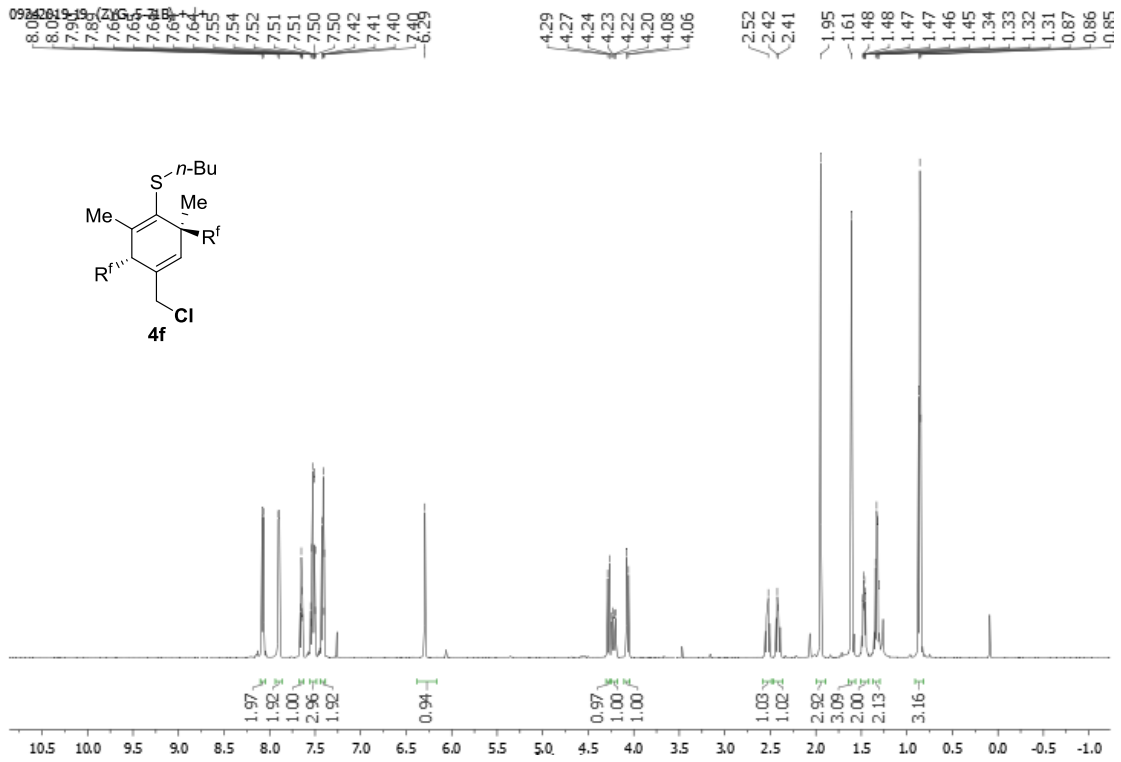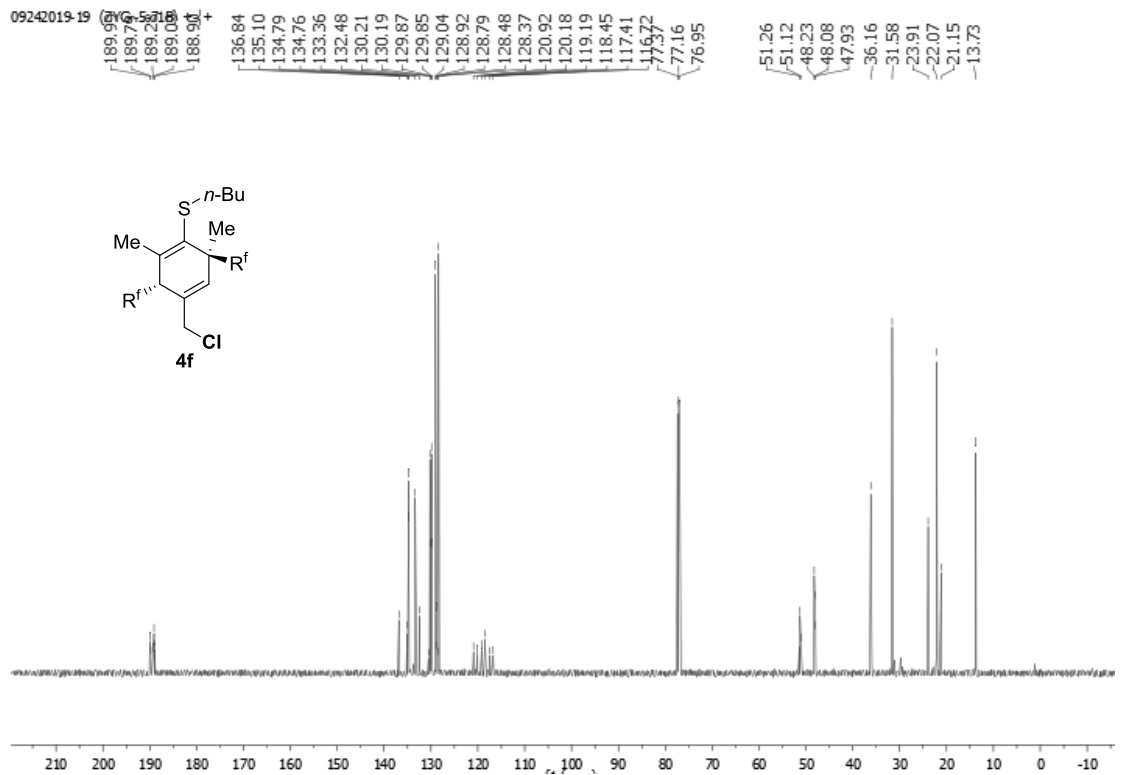

09242019-19 (ZYG-5-71B) +, -

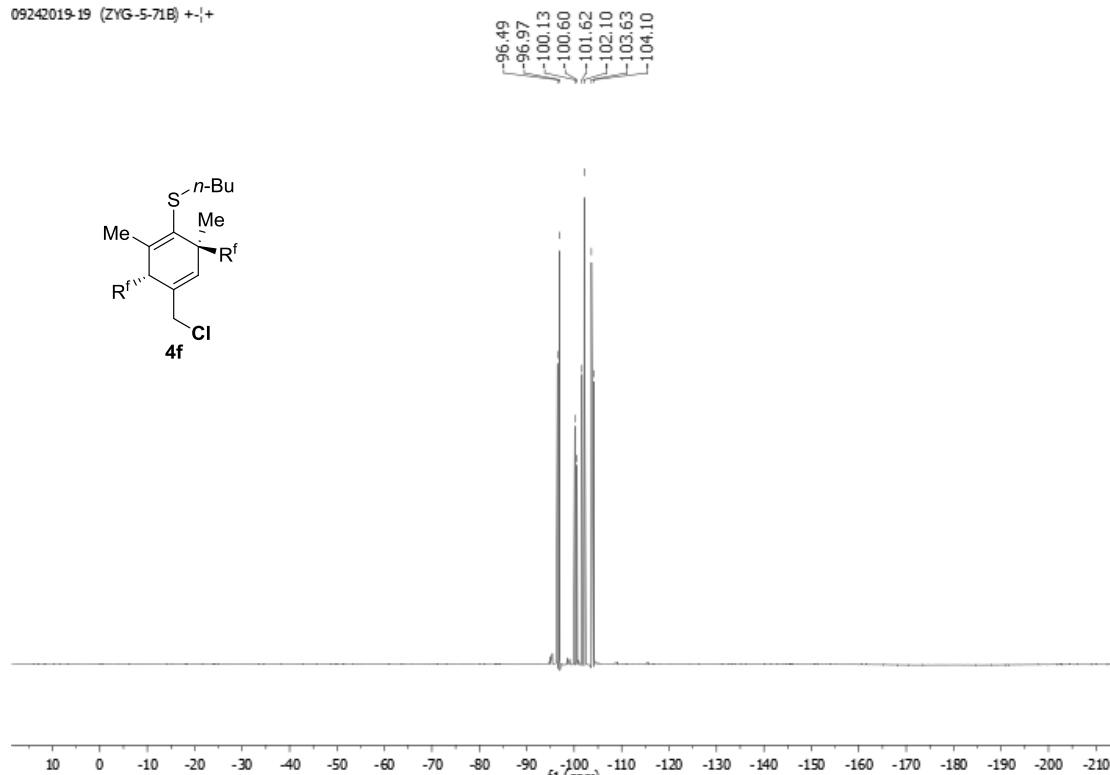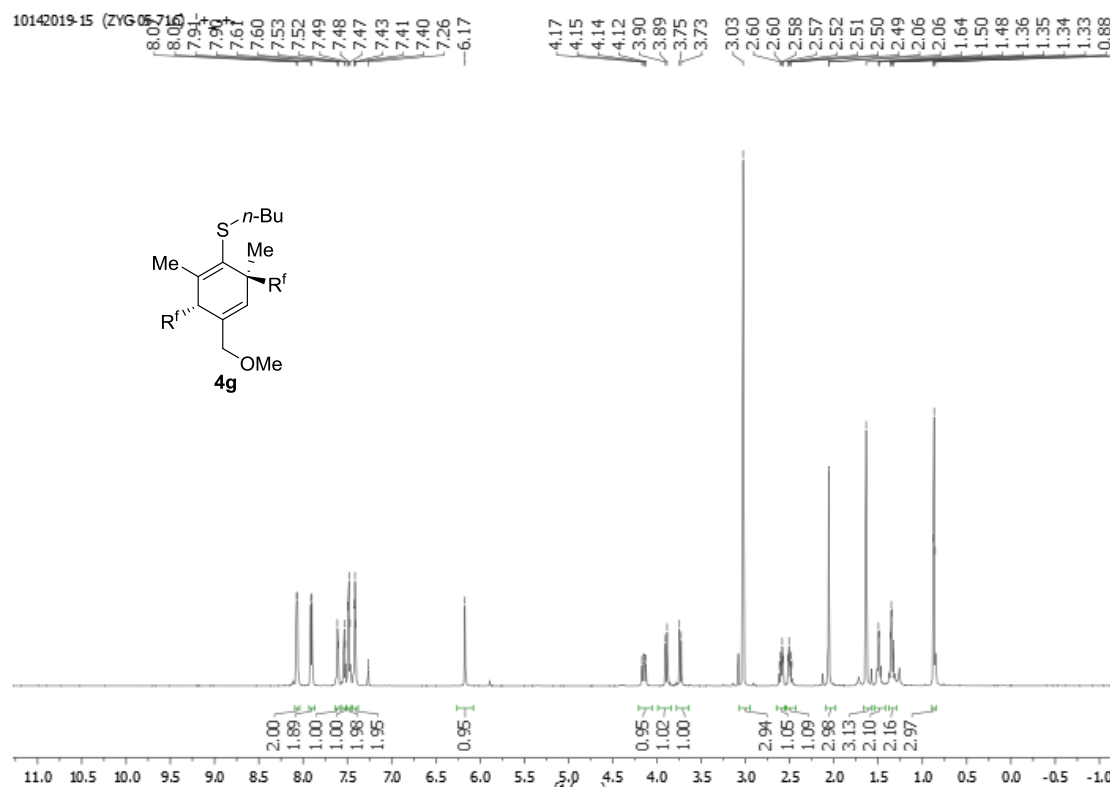

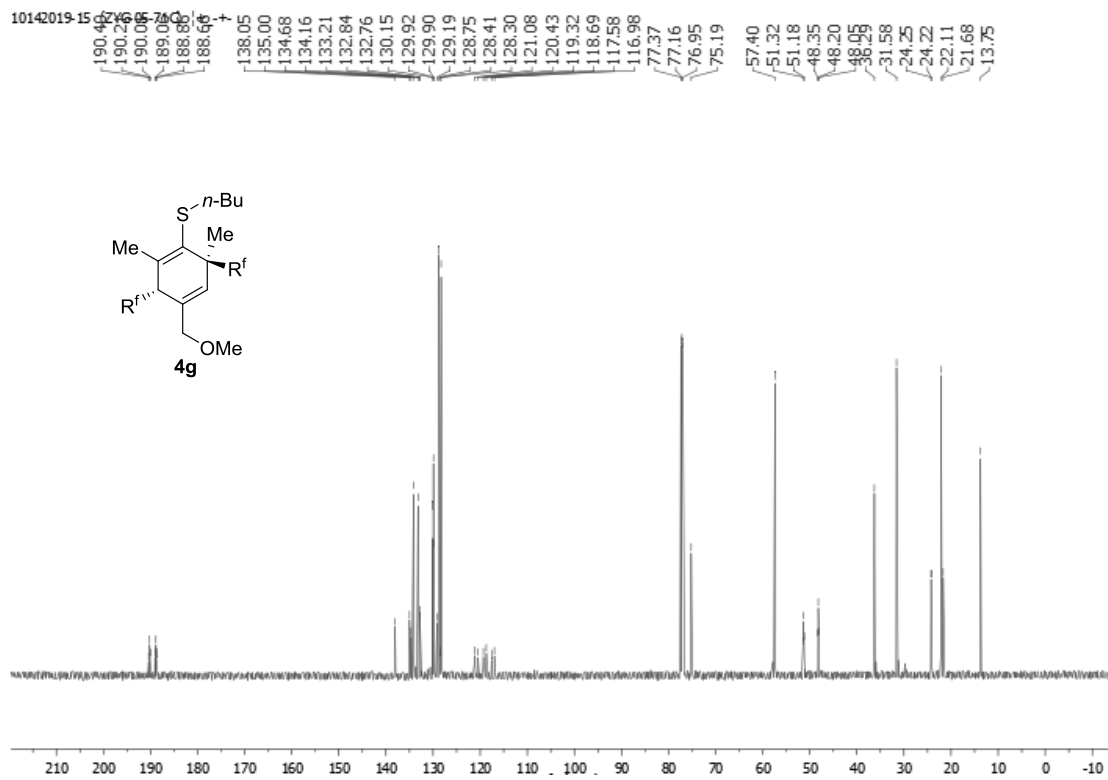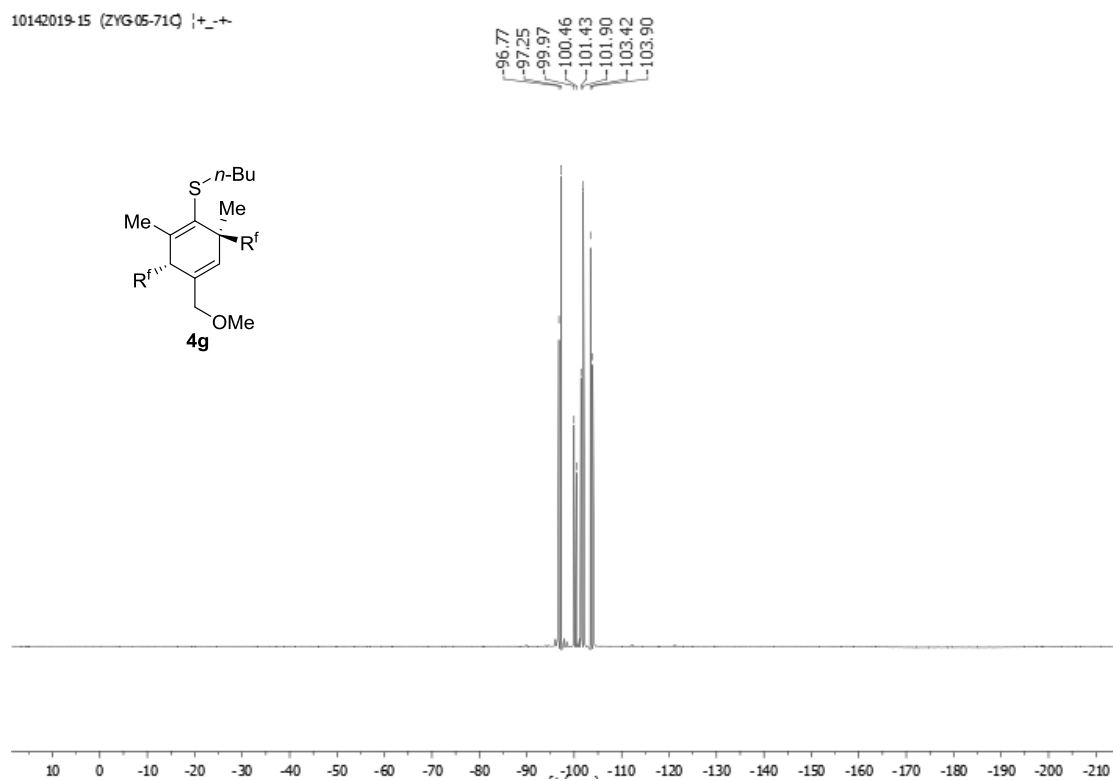

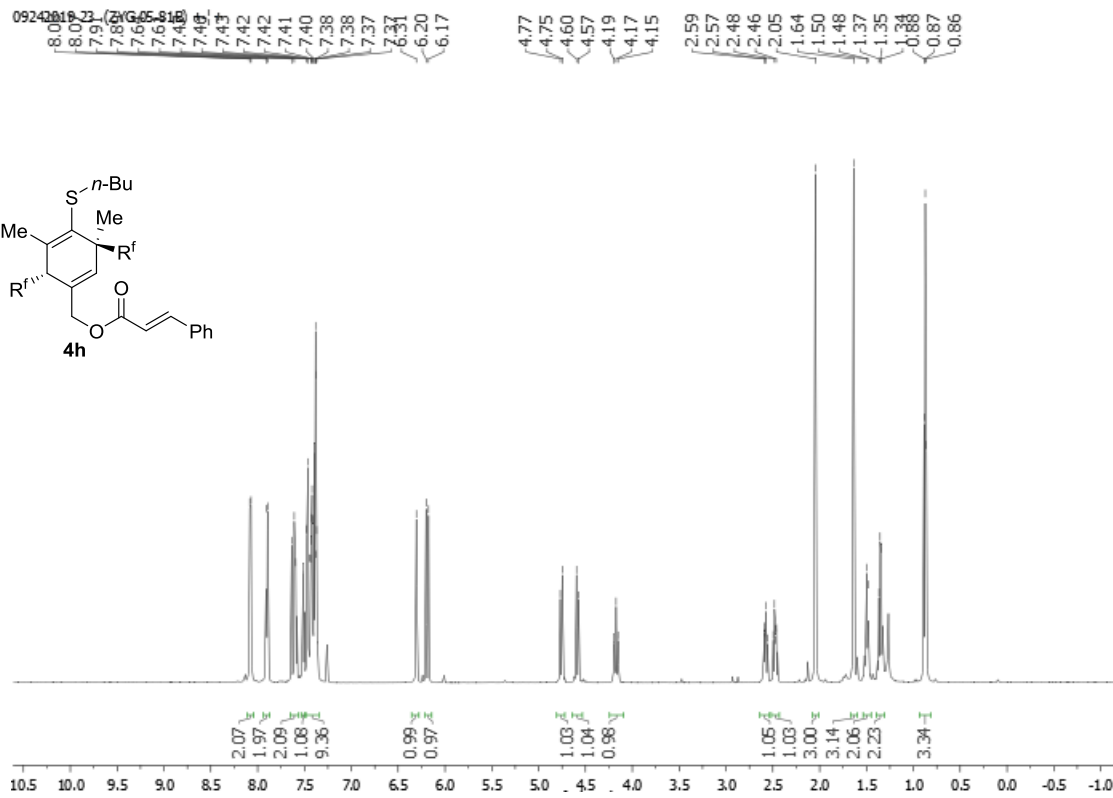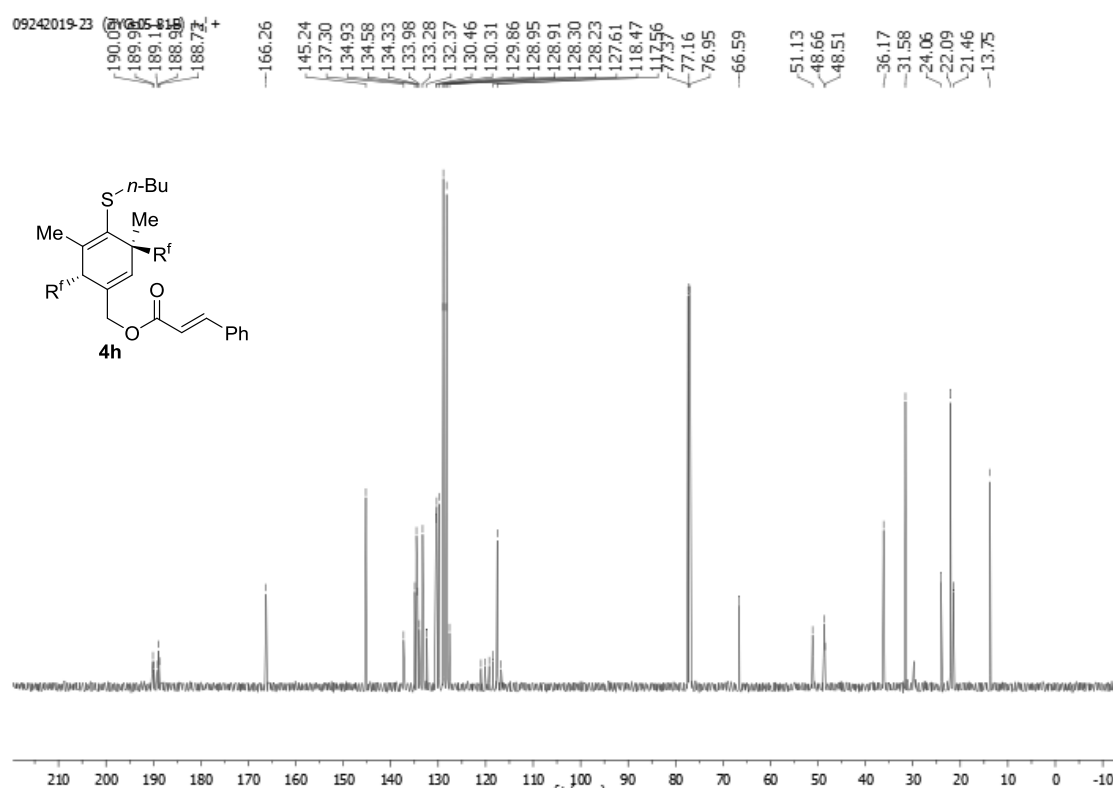



09242019-23 (ZYG 05-81B) +/-

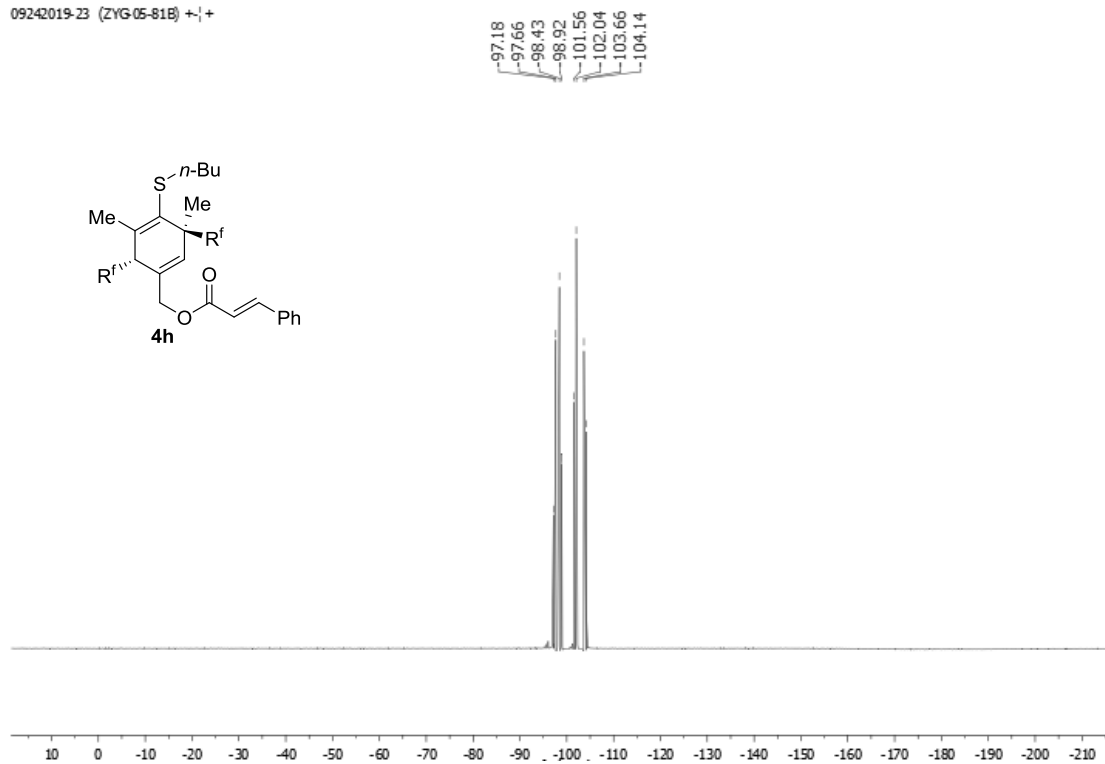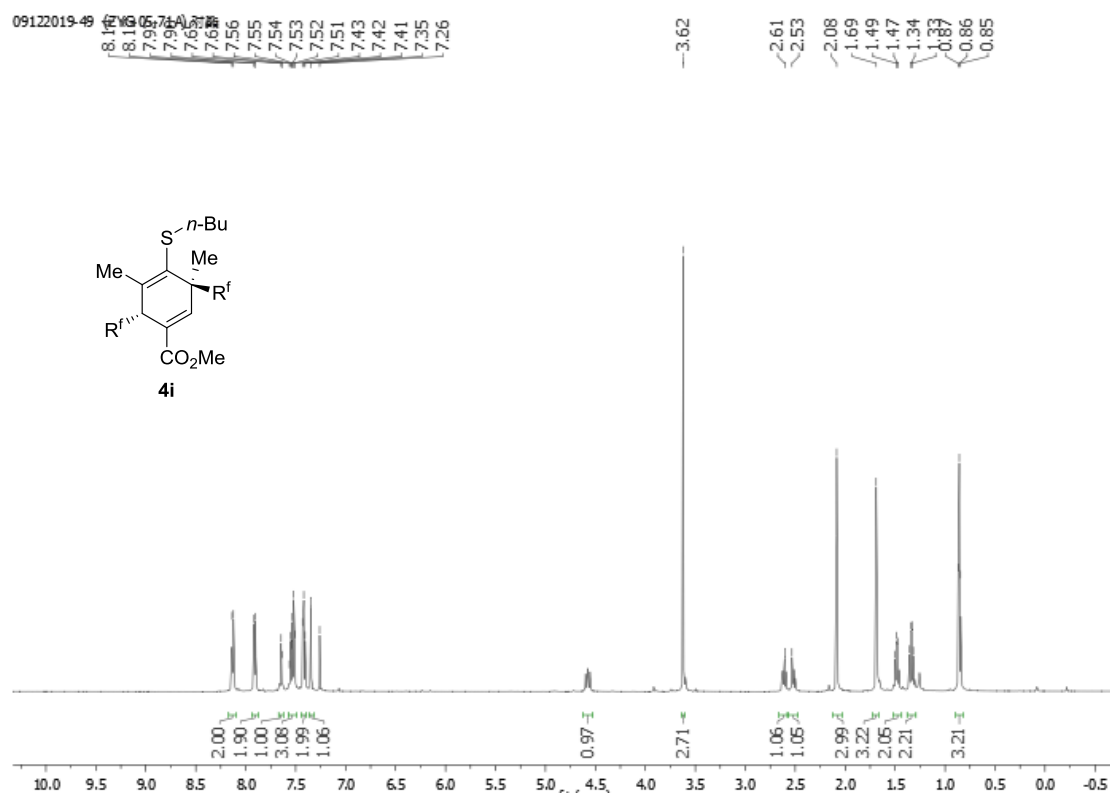

09122019-49 (ZYG-05-71A) 对照

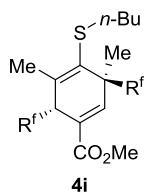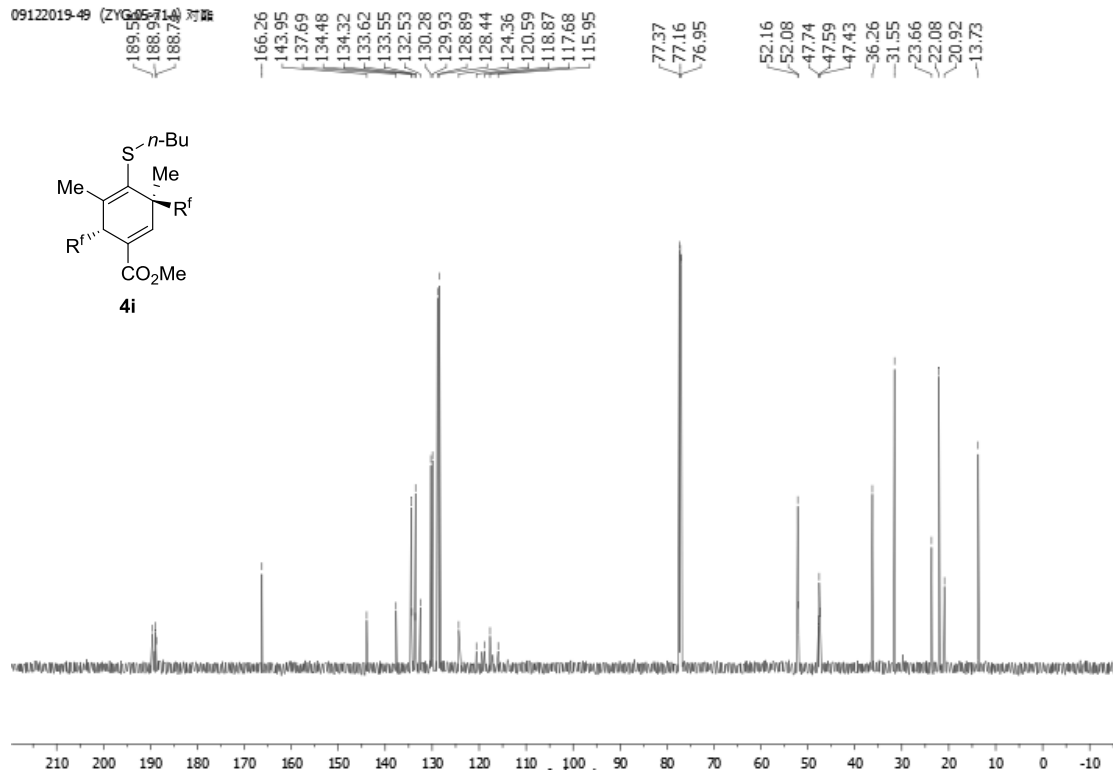

09122019-49 (ZYG-05-71A) 对照

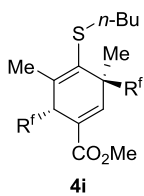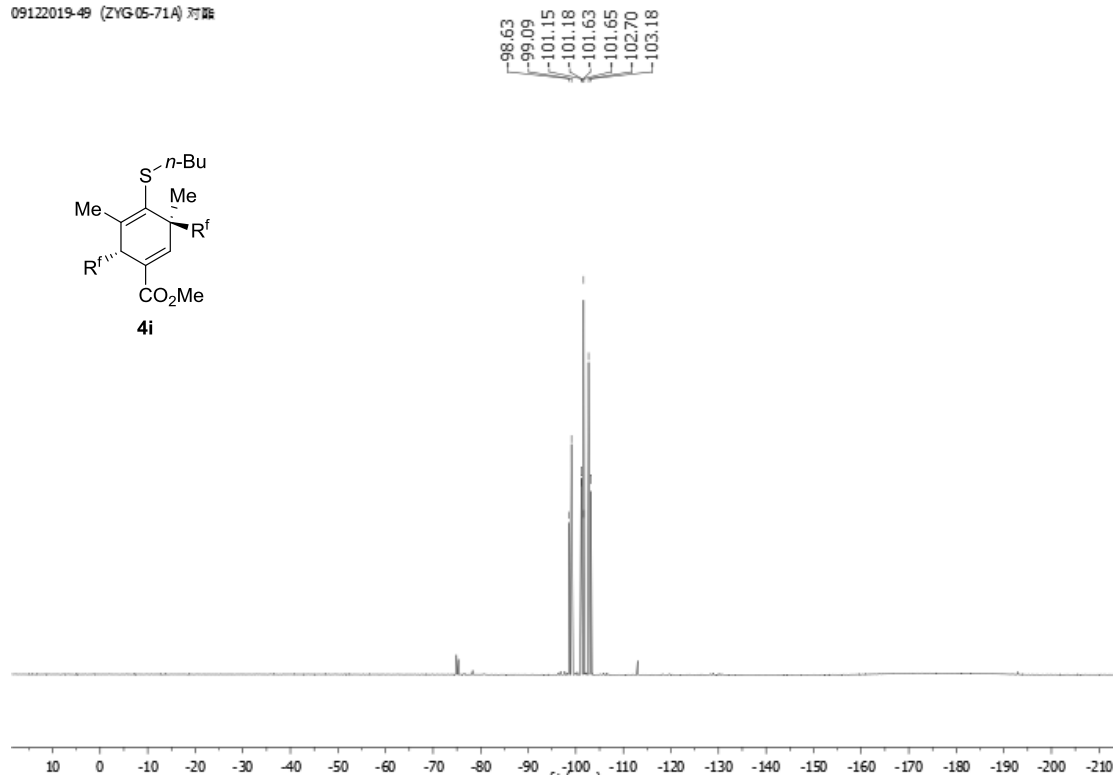

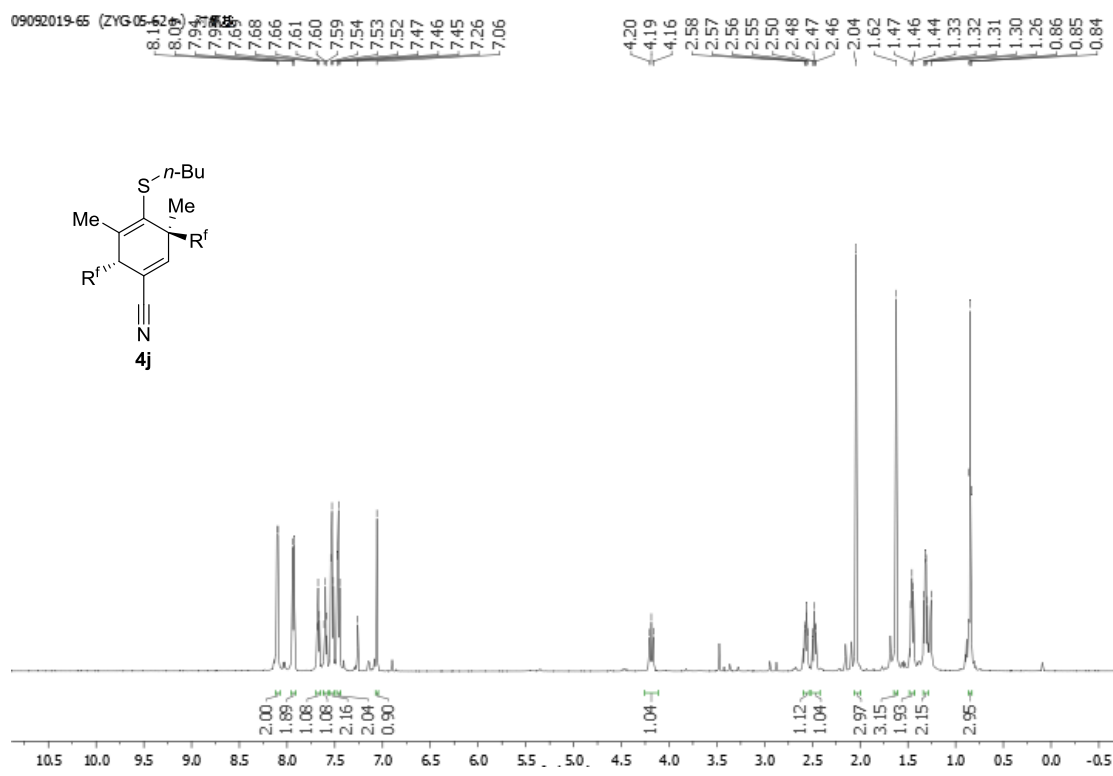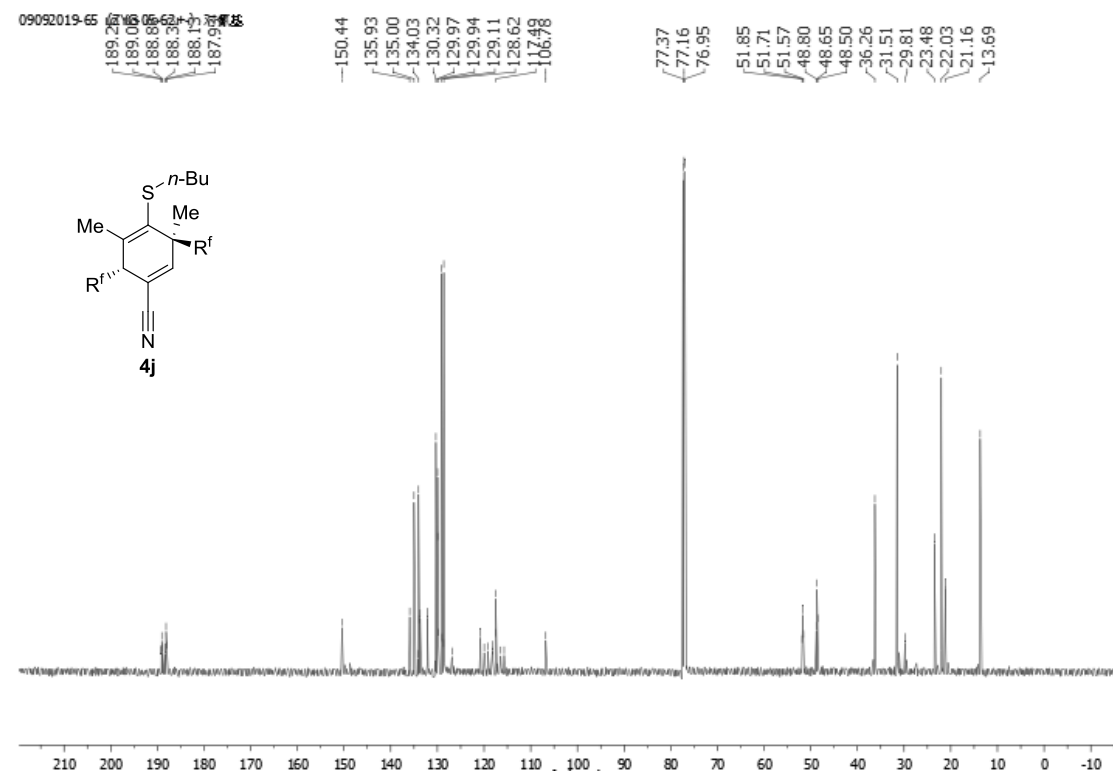

09092019-65 (ZYG-05-62+) 对苯基

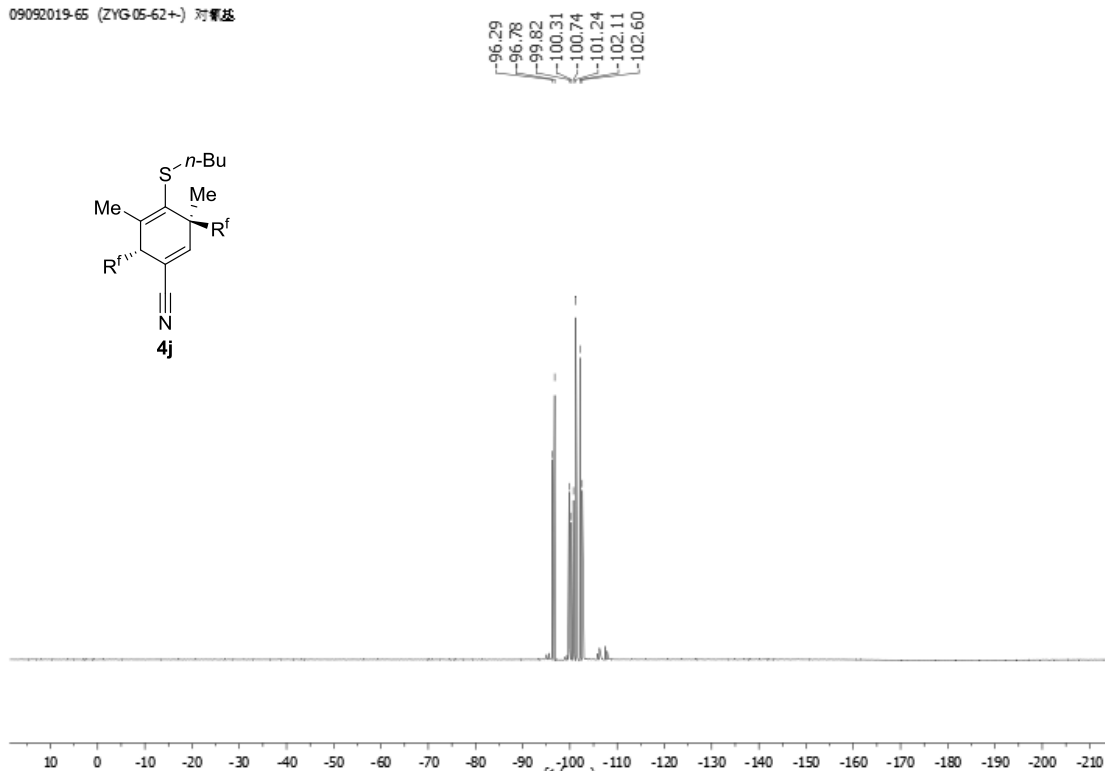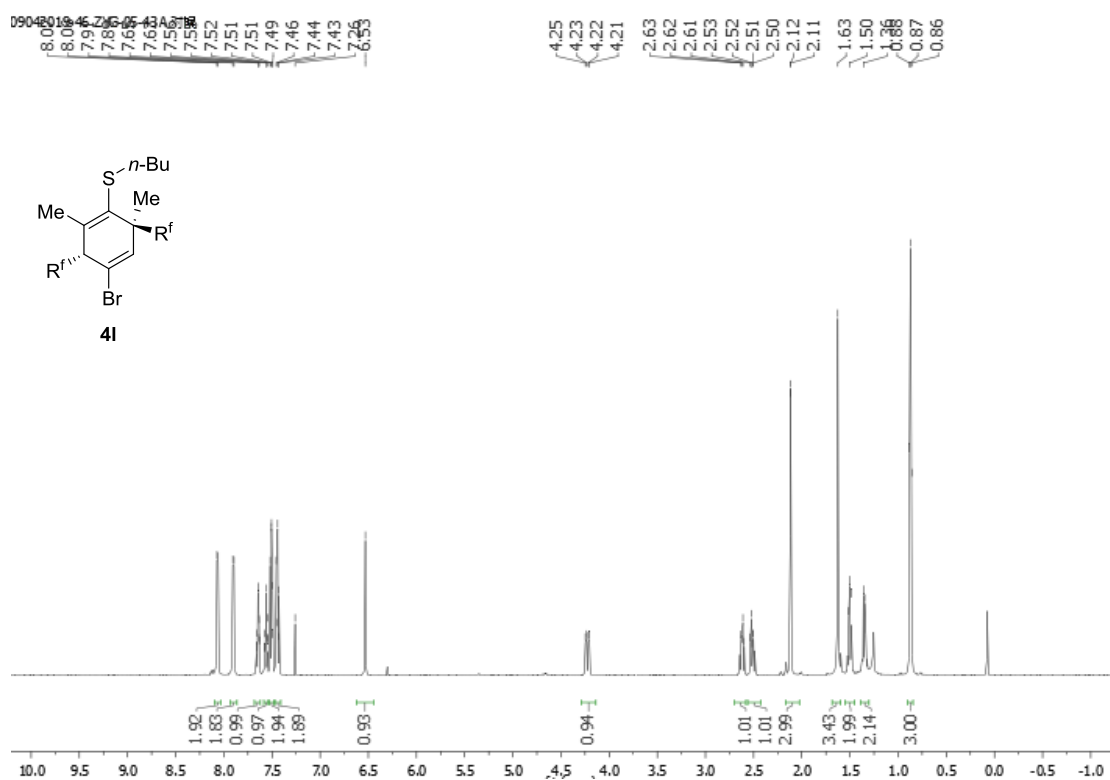

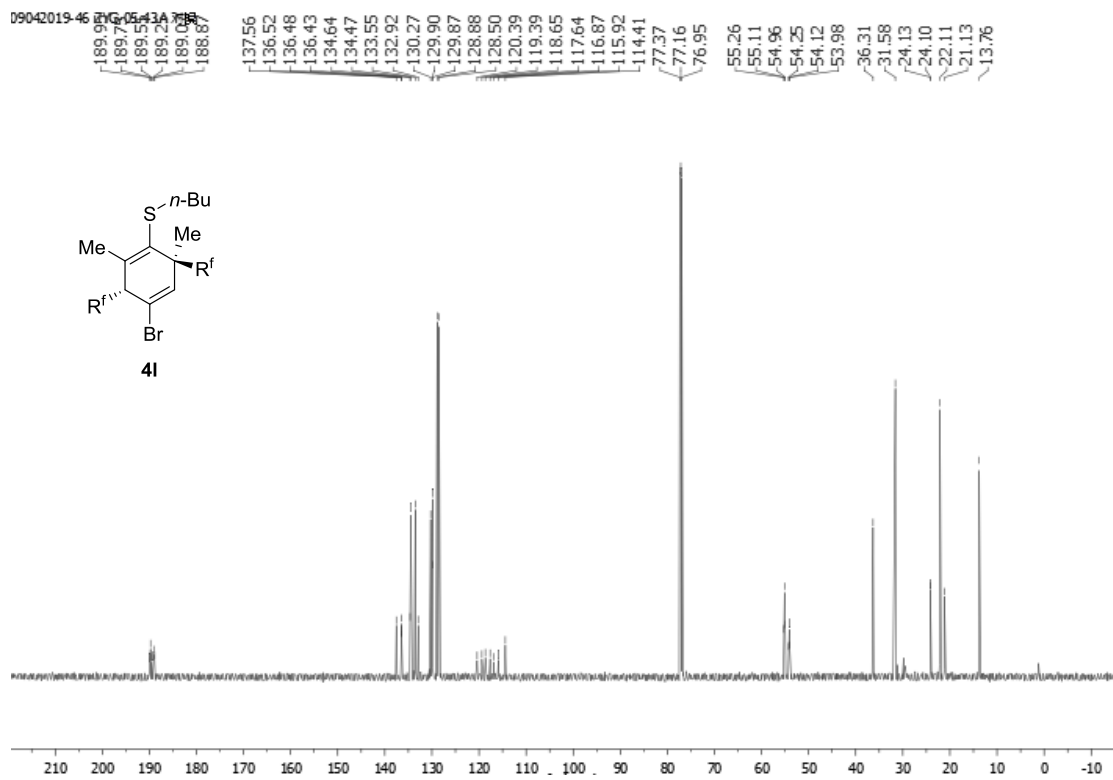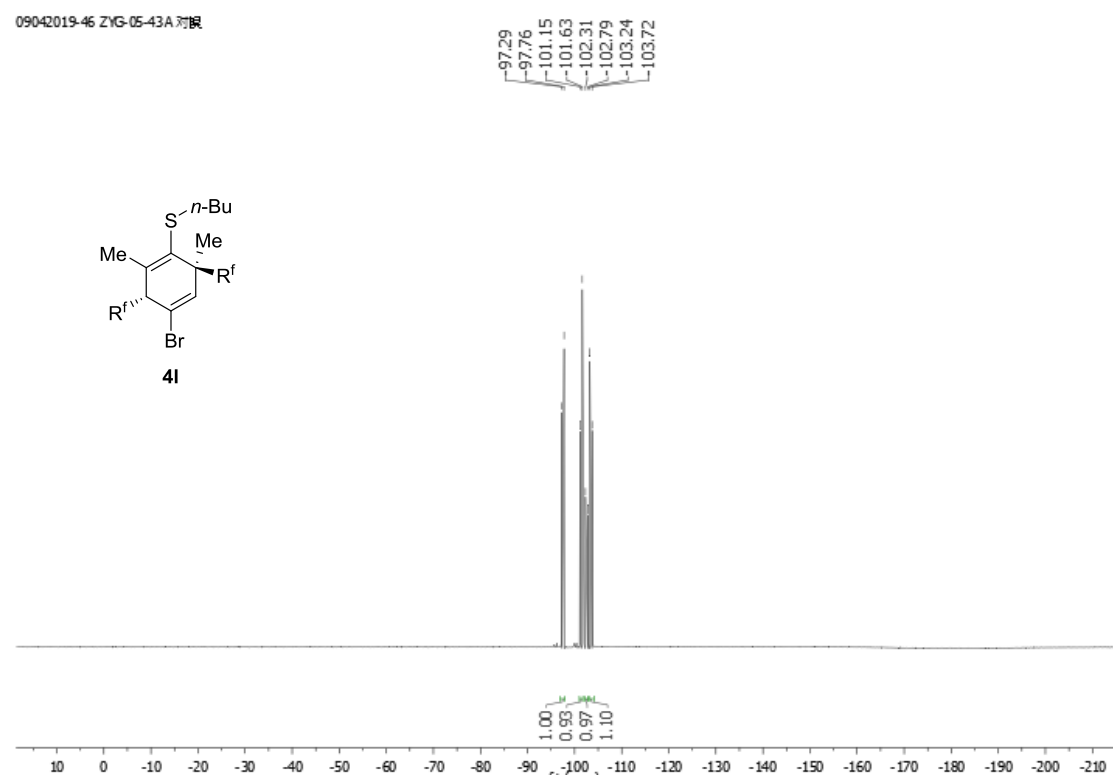

1122019-4  
 8.07  
8.04  
8.01  
8.00  
8.00  
7.97  
7.96  
7.63  
7.63  
7.62  
7.56  
7.54  
7.53  
7.50  
7.48  
7.47  
7.43  
7.41  
7.40  
7.38  
7.37  
7.37  
7.36  
7.26  
2.69  
2.68  
2.66  
2.55  
2.54  
2.54  
1.56  
1.55  
1.55  
1.54  
1.40  
1.39  
1.38  
1.36  
1.11  
1.10  
1.08  
0.92  
0.91  
0.90  
0.90  
0.89  
0.89  
0.88  
0.78  
0.77  
0.76  
0.61

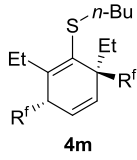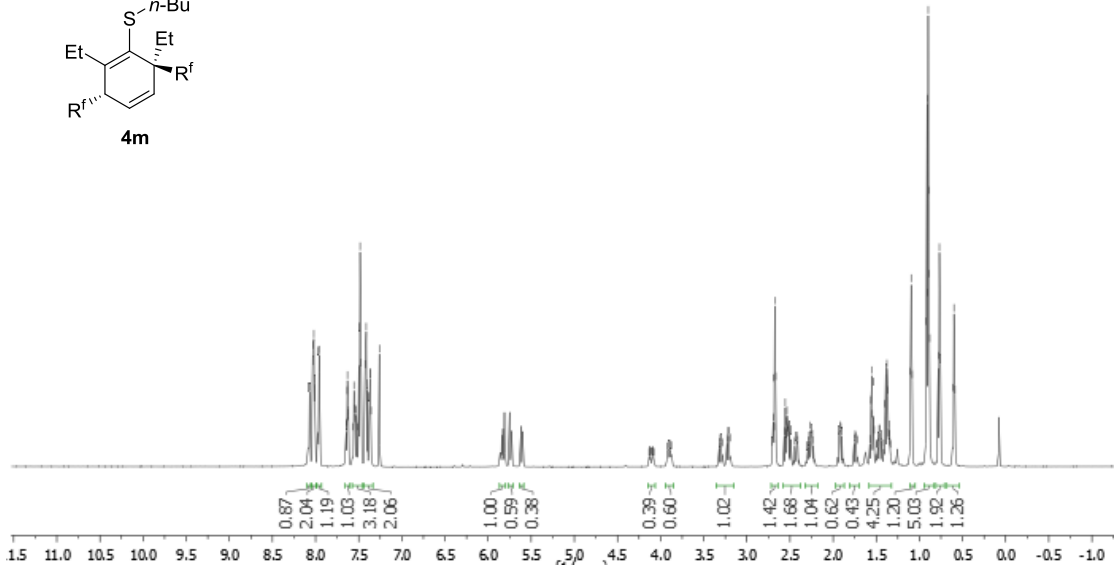

1122019-4  
 190.2  
189.2  
189.2  
145.3  
145.0  
134.7  
134.51  
134.47  
133.67  
133.58  
132.80  
132.29  
131.82  
130.81  
130.63  
130.35  
130.33  
130.22  
128.88  
128.83  
128.37  
124.77  
123.21  
118.73  
77.37  
77.16  
76.95  
55.22  
55.08  
54.45  
54.32  
54.18  
43.46  
43.31  
43.16  
43.05  
42.91  
42.75  
37.85  
36.74  
31.75  
31.27  
28.46  
28.09  
26.02  
25.49  
22.29  
22.21  
13.91  
13.86  
12.96  
12.46  
9.03

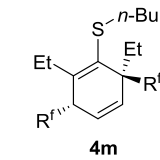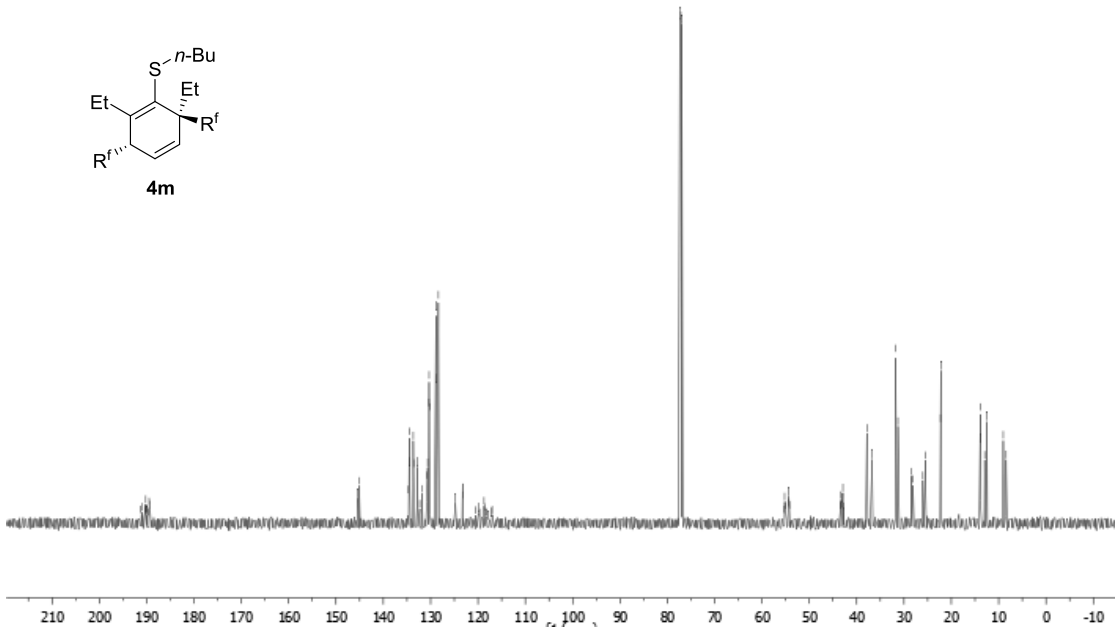

11272019-42 二乙基

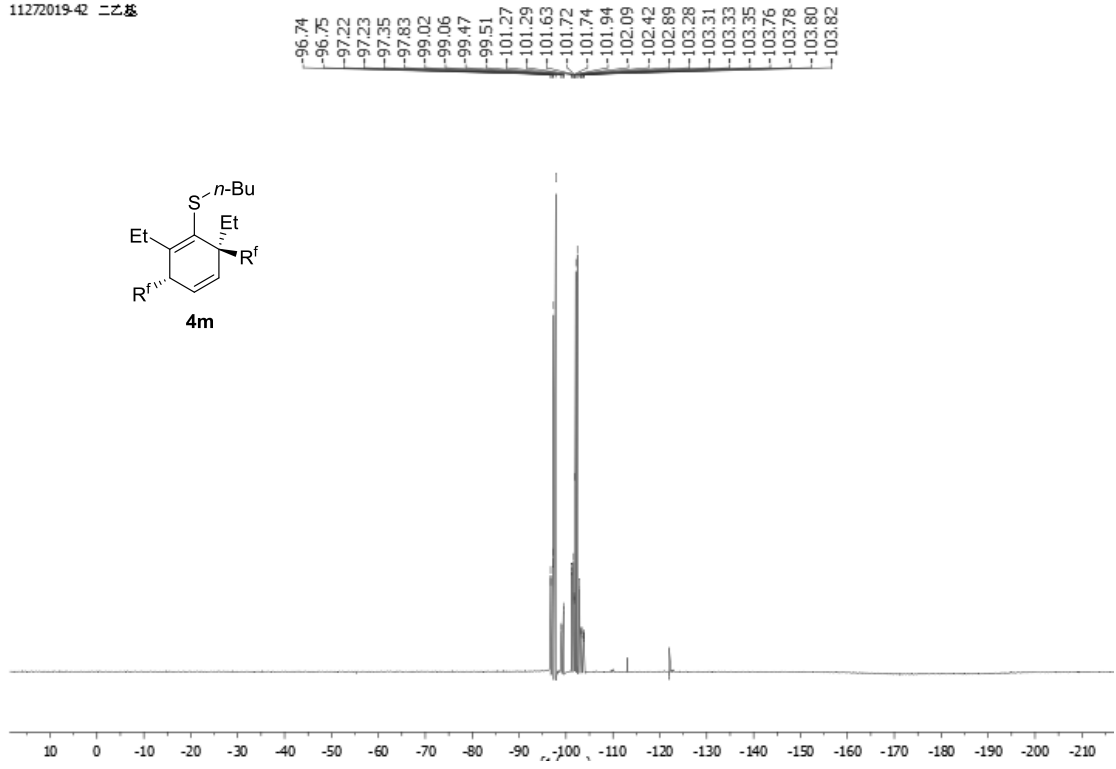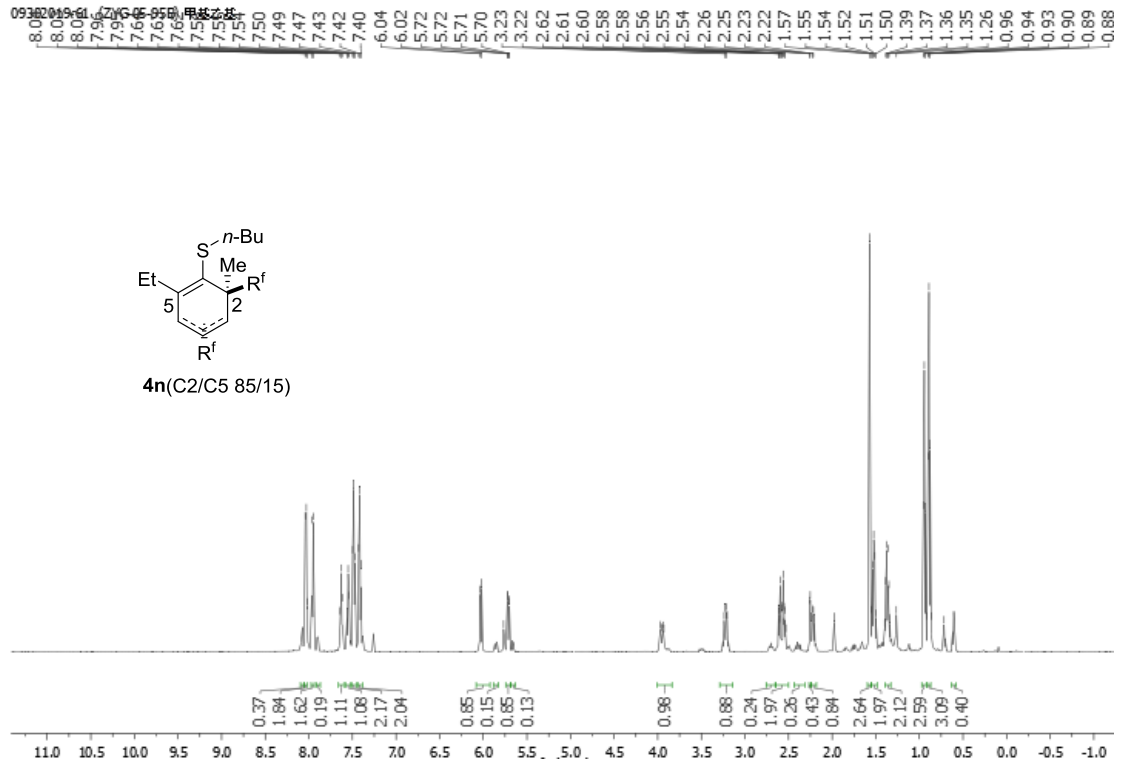

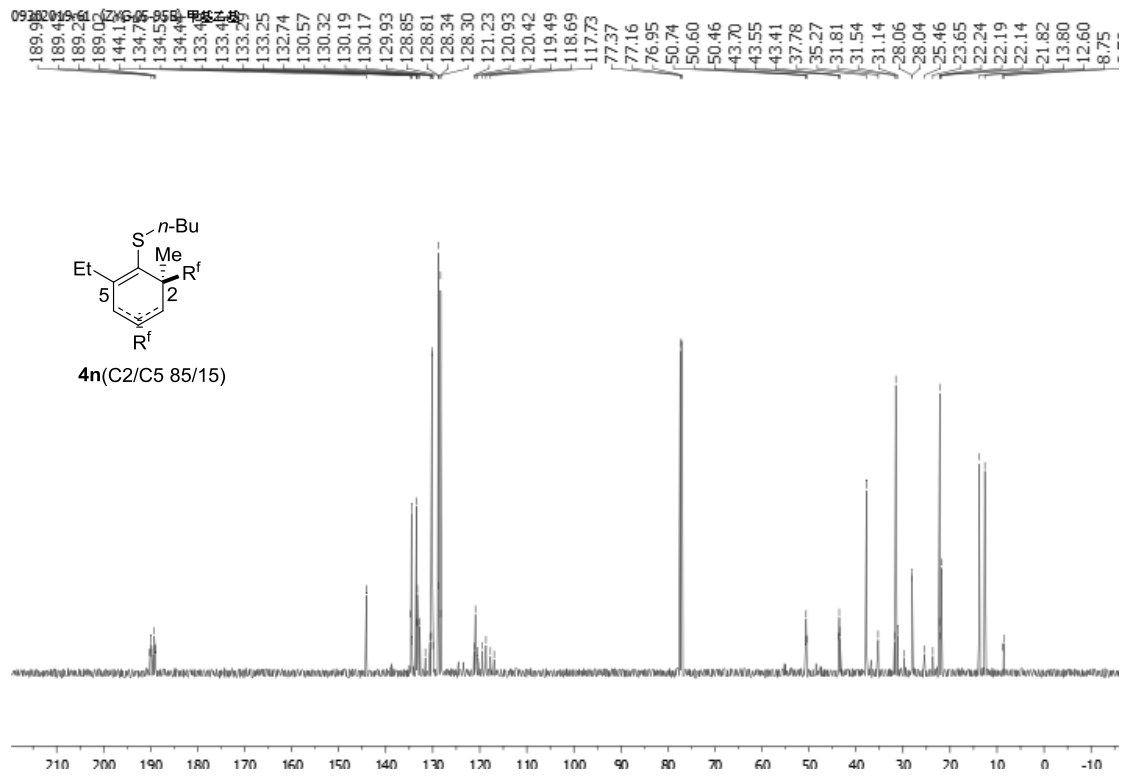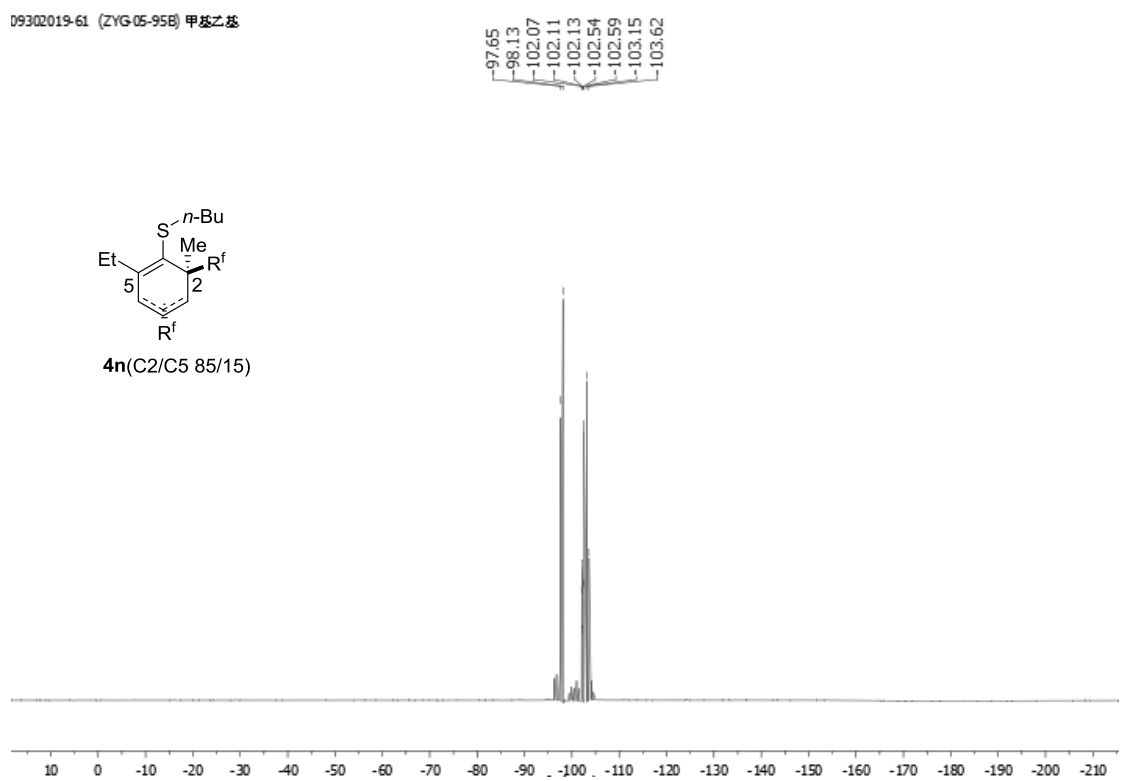



10222019-8 (ZYG-05-121) 77.37 76.95 51.58 51.44 51.30 48.29 48.15 48.00 36.19 30.63 23.39 21.87 13.50

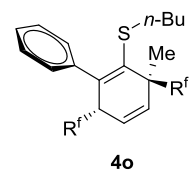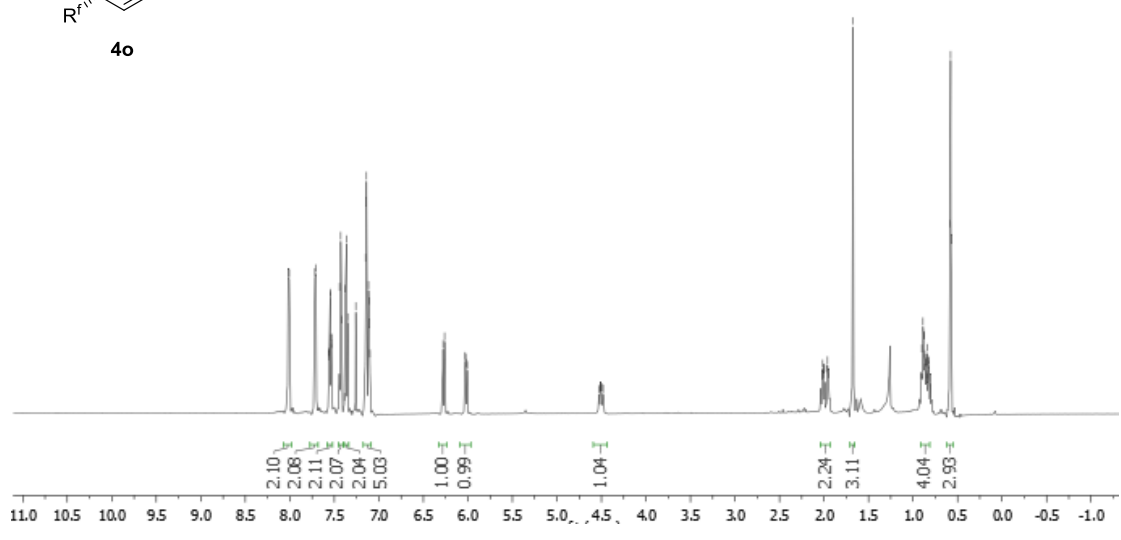

10222019-8 (ZYG-05-121) 189.55 189.38 189.15 188.75 188.55 188.33 140.39 140.20 135.97 134.65 134.01 133.36 132.47 130.09 130.07 129.76 129.59 128.43 128.05 127.40 120.91 120.57 119.94 119.16 119.16 118.20 117.44 116.50 77.37 77.16 76.95 51.58 51.44 51.30 48.29 48.15 48.00 36.19 30.63 23.39 21.87 13.50

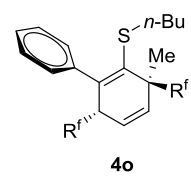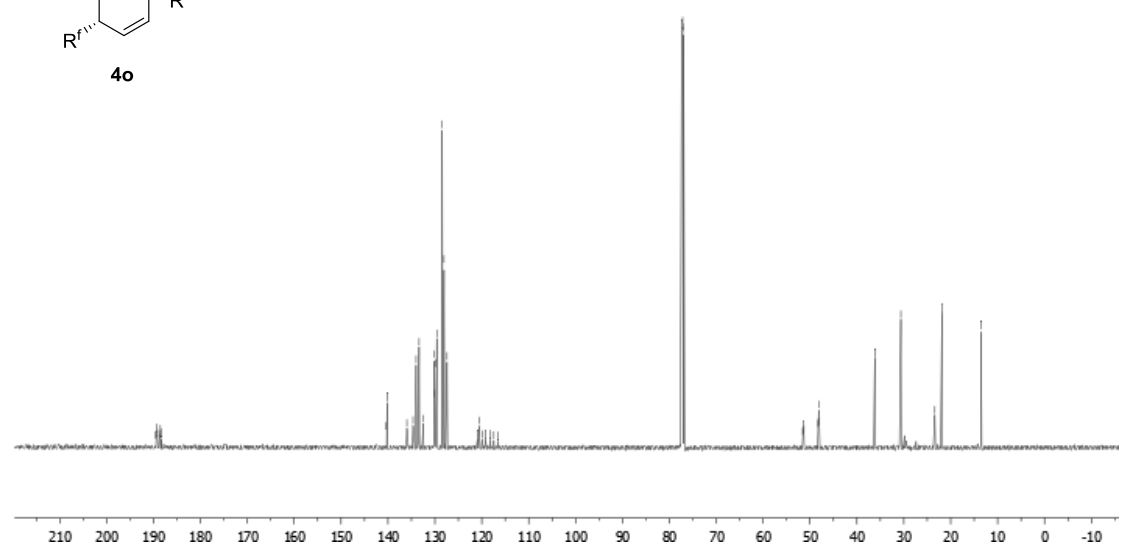

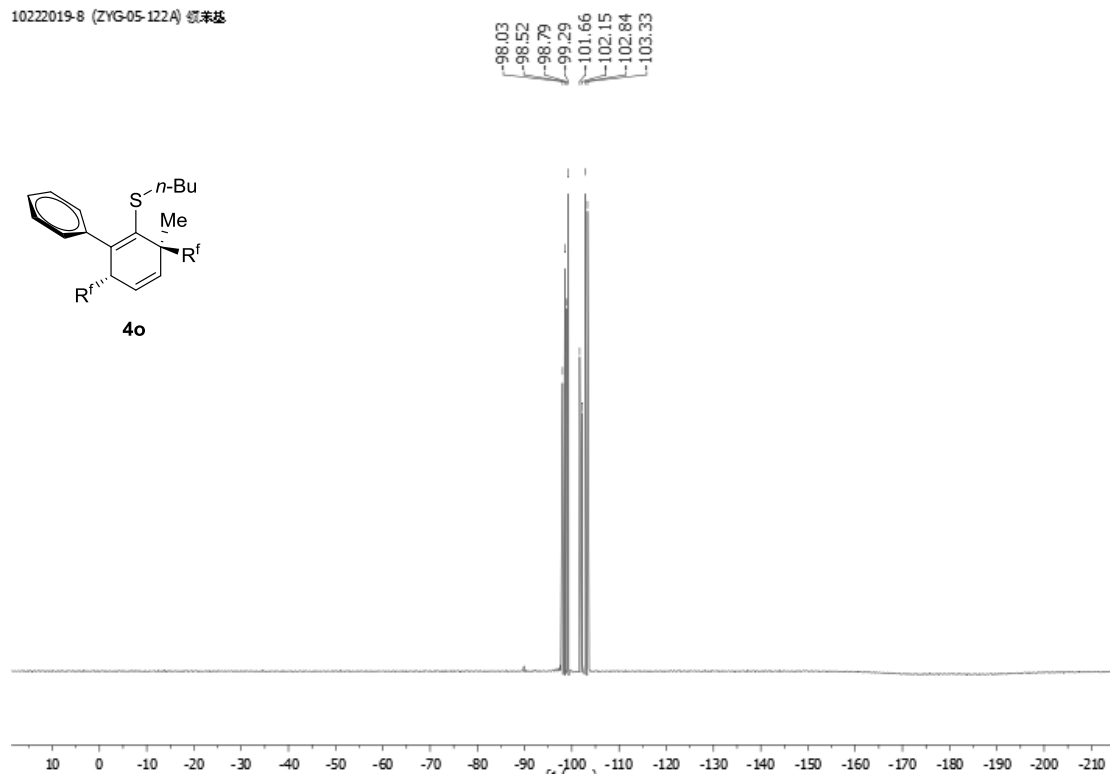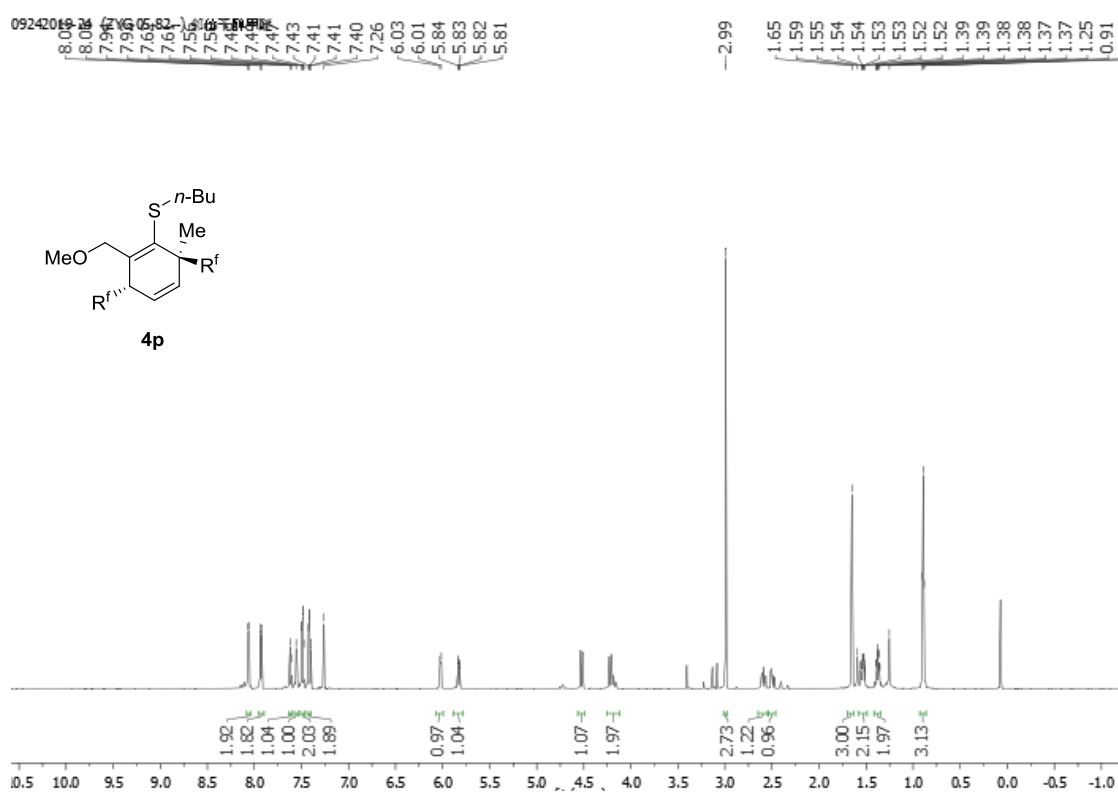

09242019-24 (ZYG-05-82-) 邻位干醚甲醚

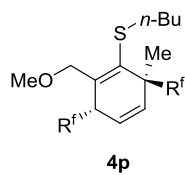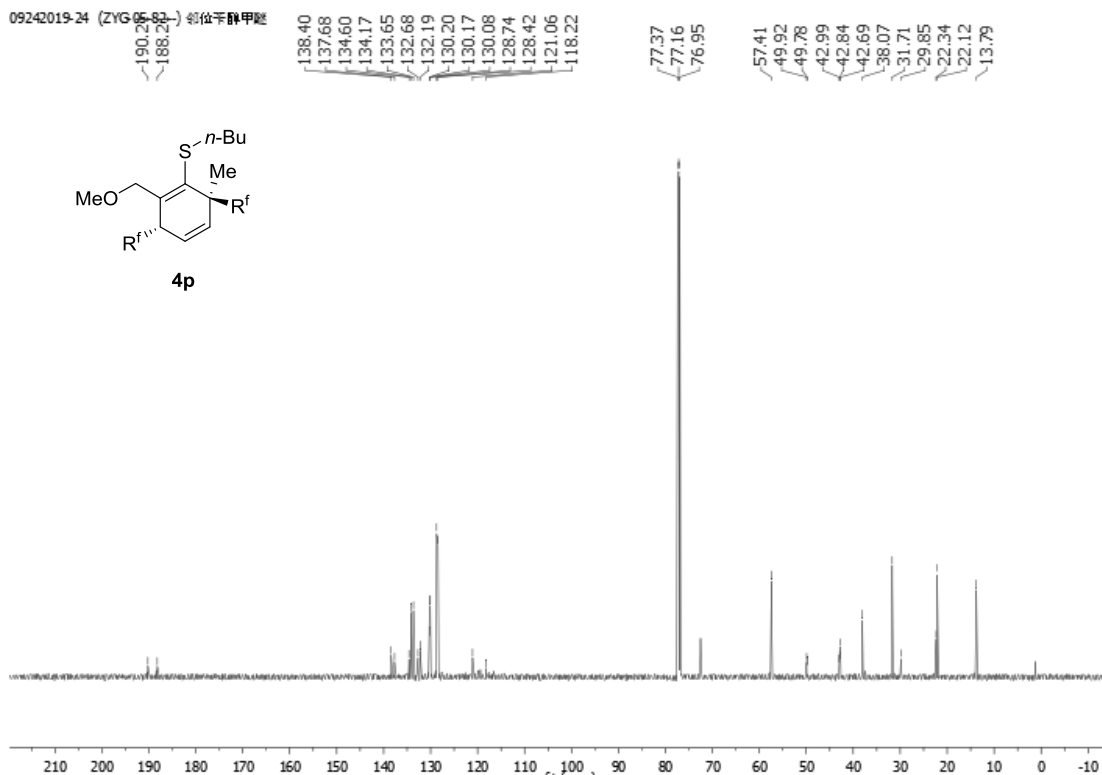

09242019-24 (ZYG-05-82-) 邻位干醚甲醚

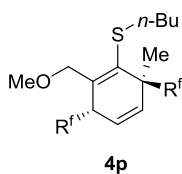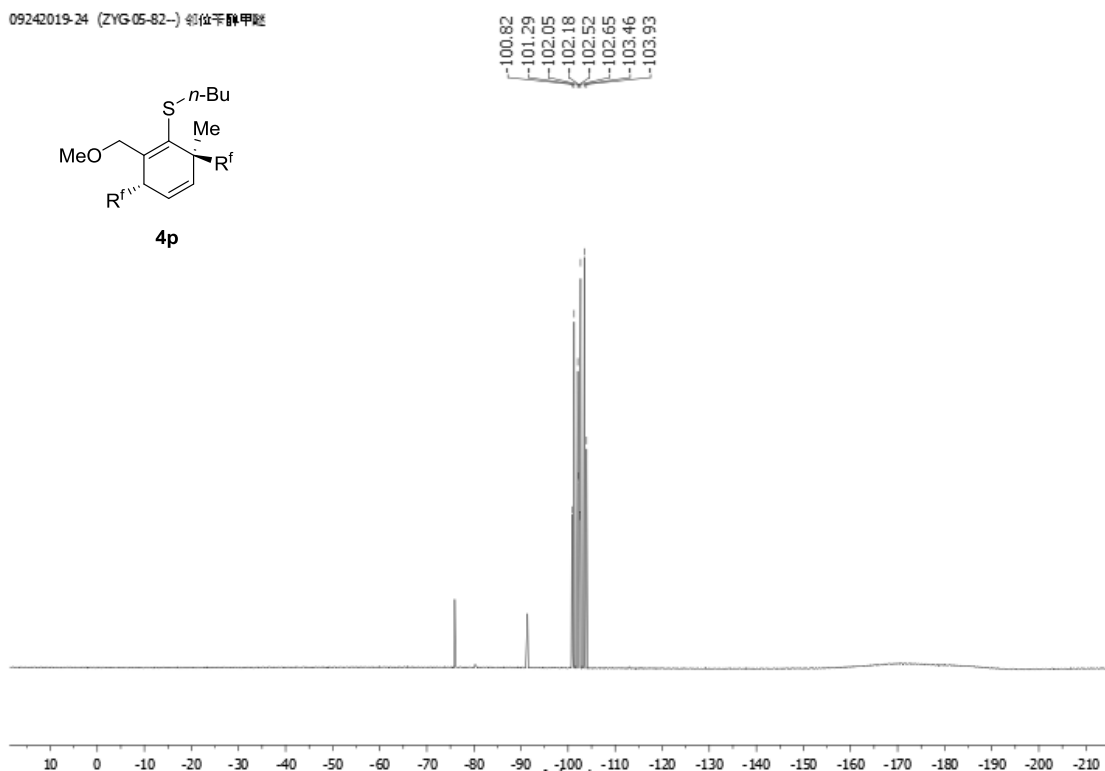



10142019-16 (ZYG-05-96B) 邻位长链羧

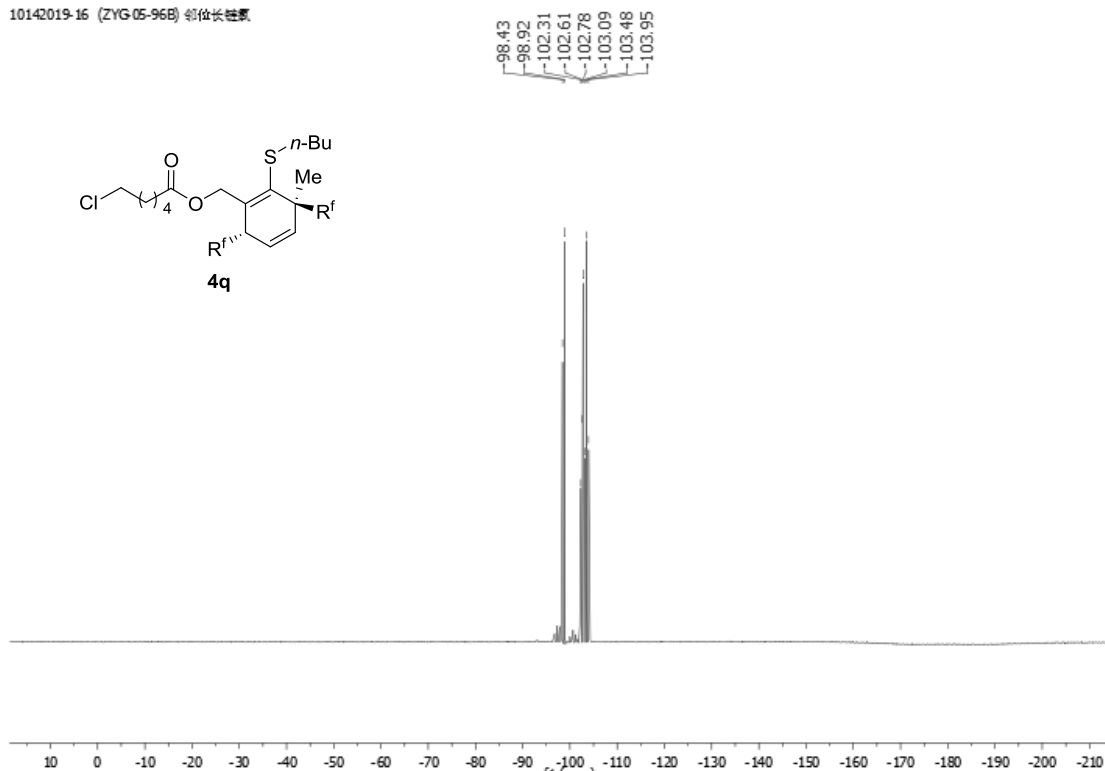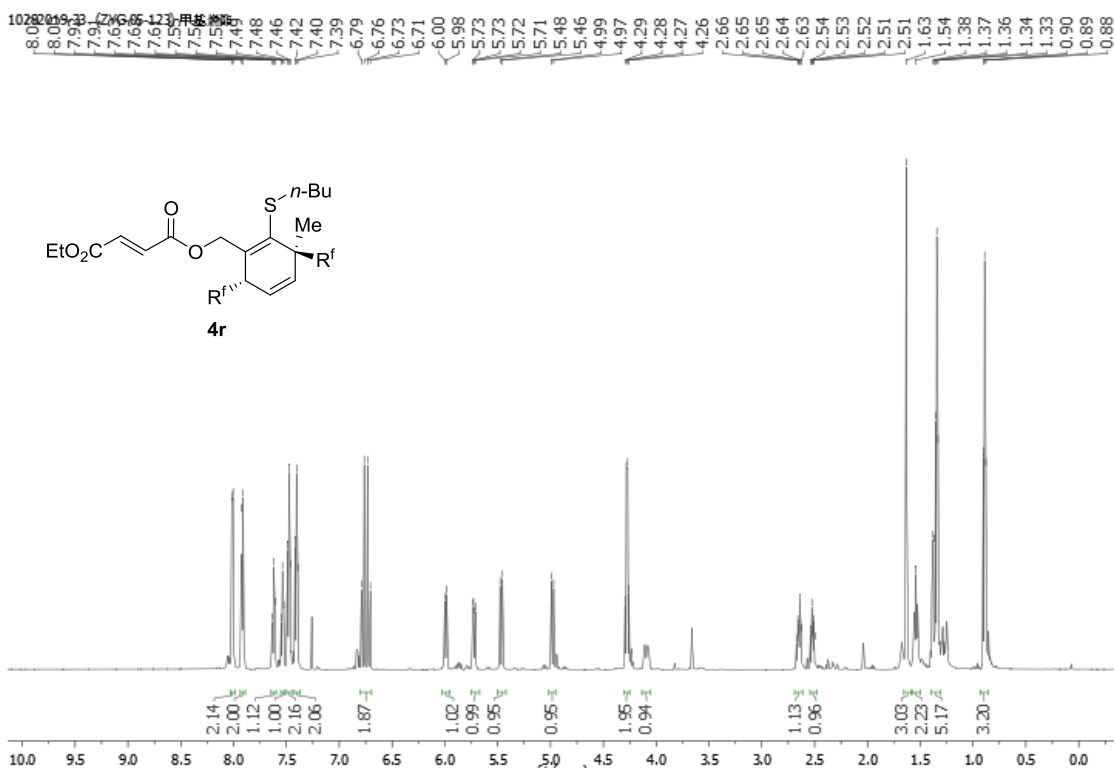

10282019-33 (ZYG-05-123) 甲基噻吩  
 190.07, 189.89, 189.66, 188.63, 188.4, 188.2, 164.87, 164.10, 140.91, 135.06, 134.74, 134.44, 134.12, 133.80, 132.89, 132.47, 132.27, 130.17, 130.07, 130.05, 128.96, 128.87, 128.48, 128.44, 120.52, 77.16, 76.95, -66.12, -61.55, -50.03, -49.89, -43.23, -43.08, -42.93, -38.26, -31.76, -22.07, -14.27, -14.22, -13.80, -13.75

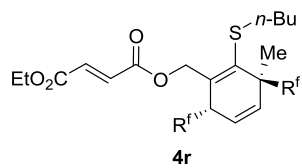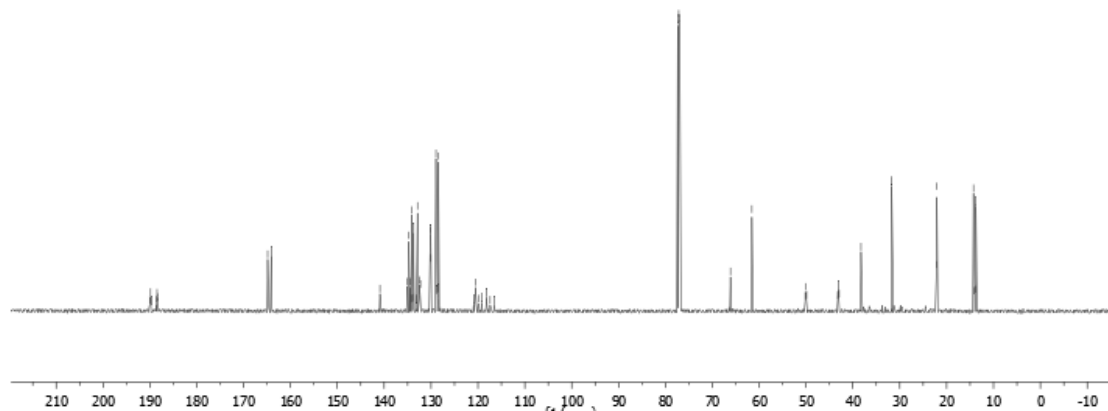

10282019-33 (ZYG-05-123) 甲基噻吩

98.87, 99.35, 102.52, 102.60, 102.99, 103.09, 103.62, 104.09

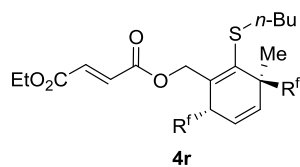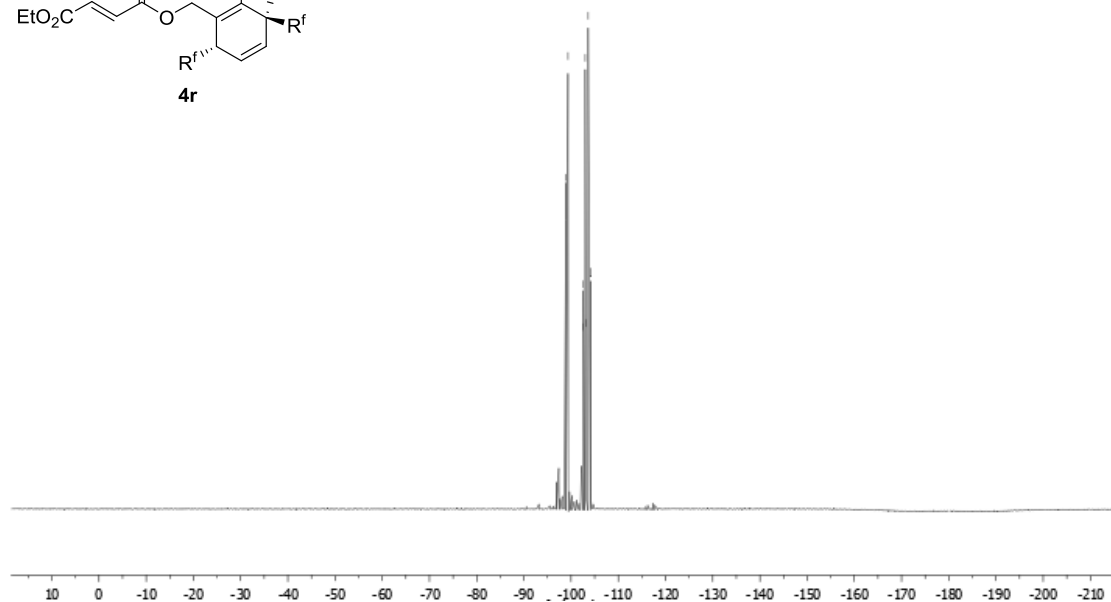

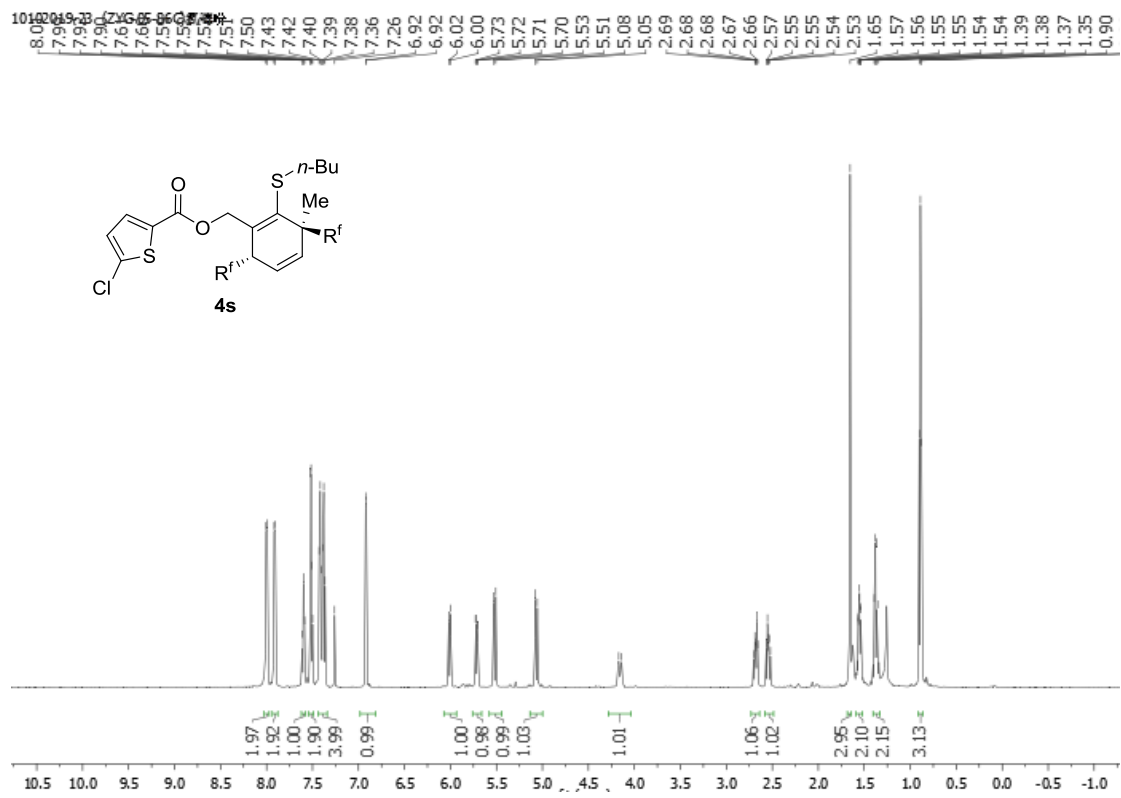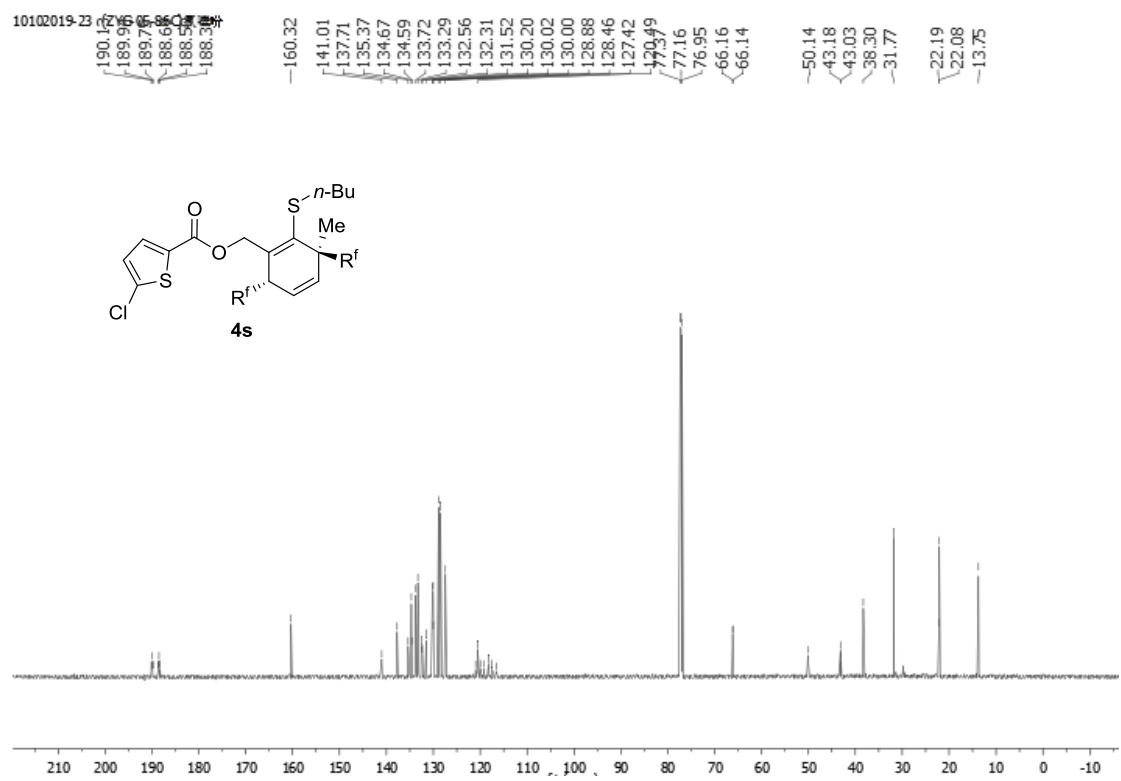

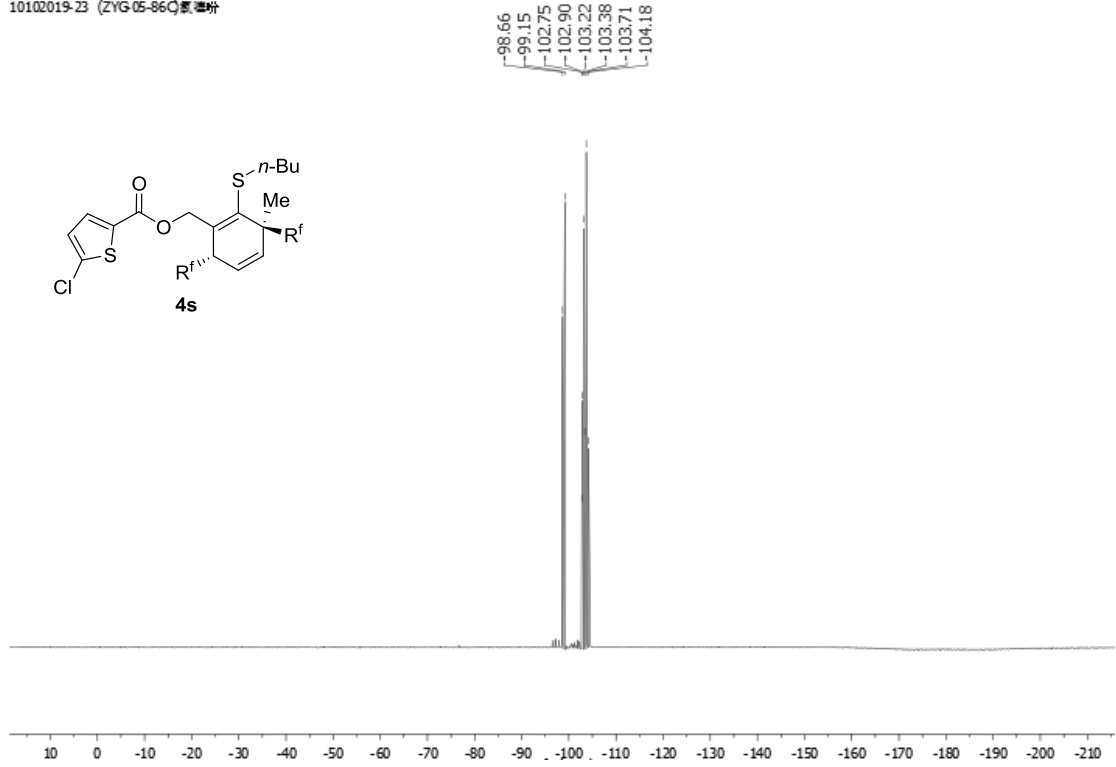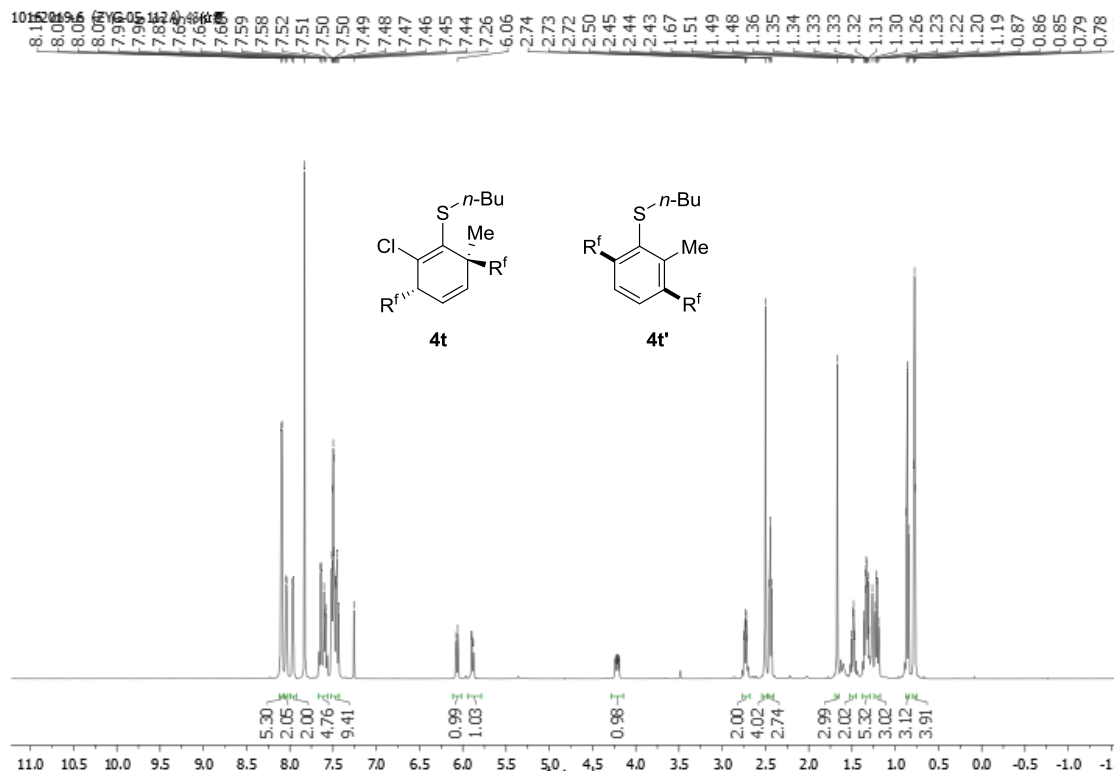



10162019-42

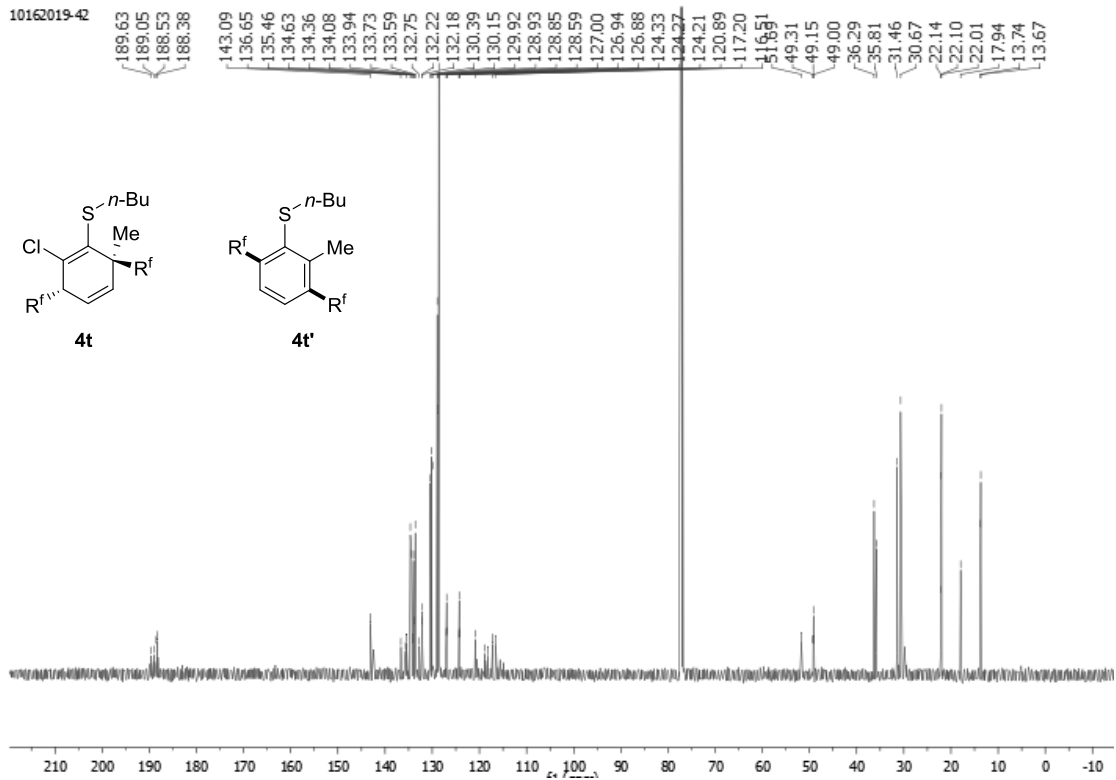

10162019-42

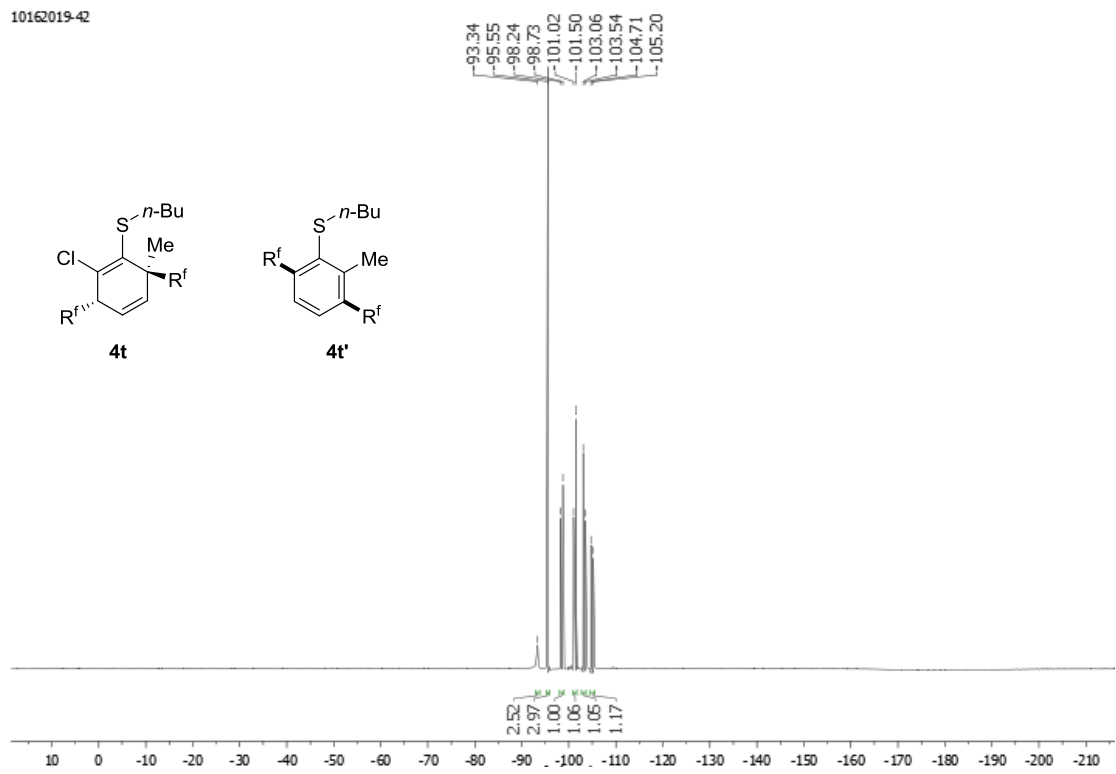

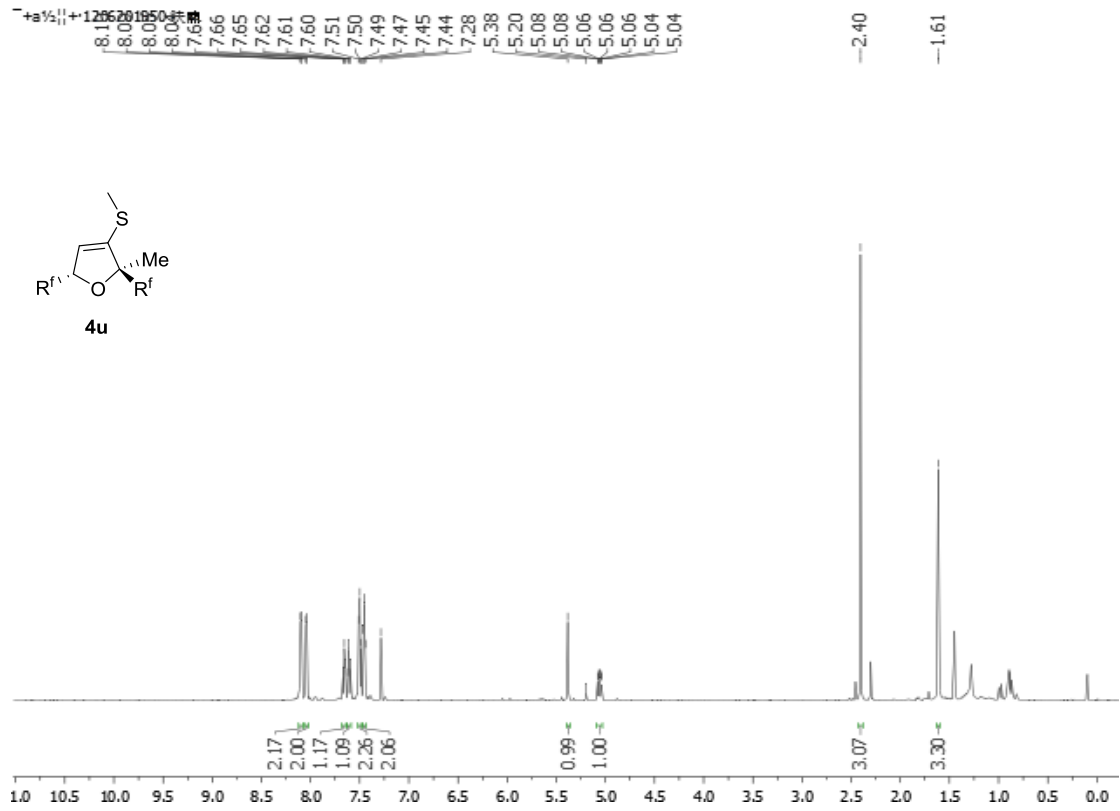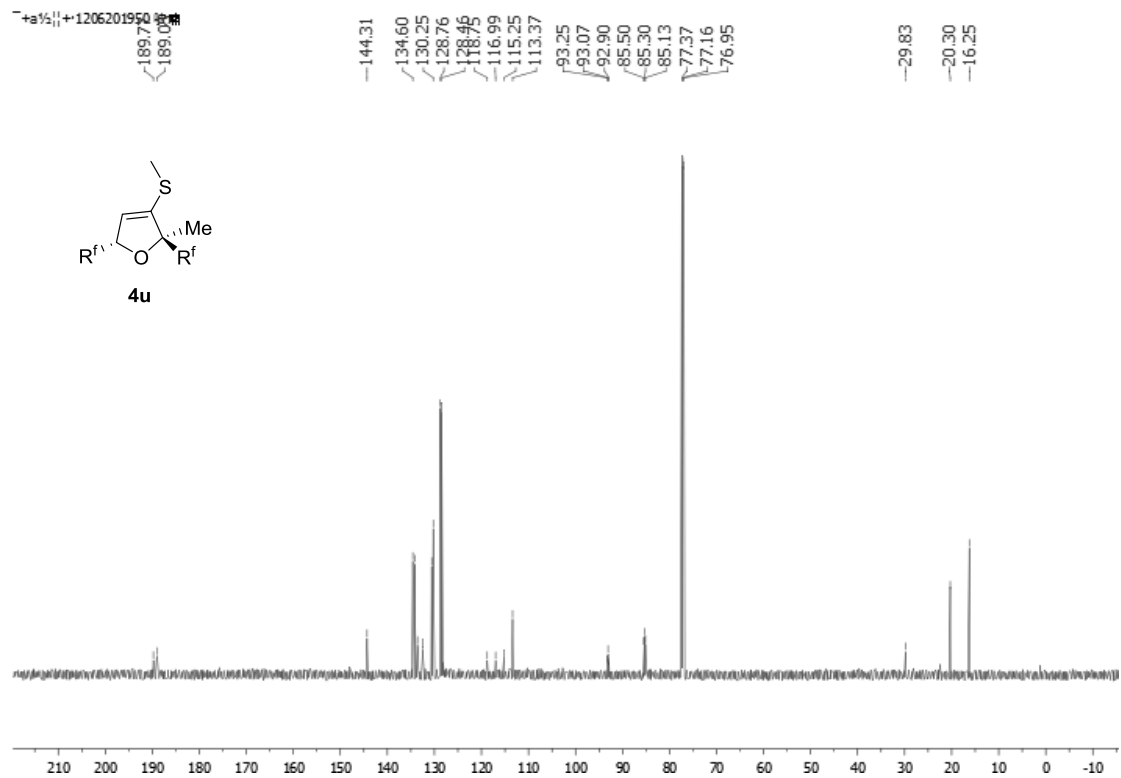

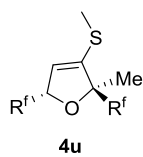

106.23  
106.70  
108.70  
108.92  
109.17  
109.42  
113.06  
113.57

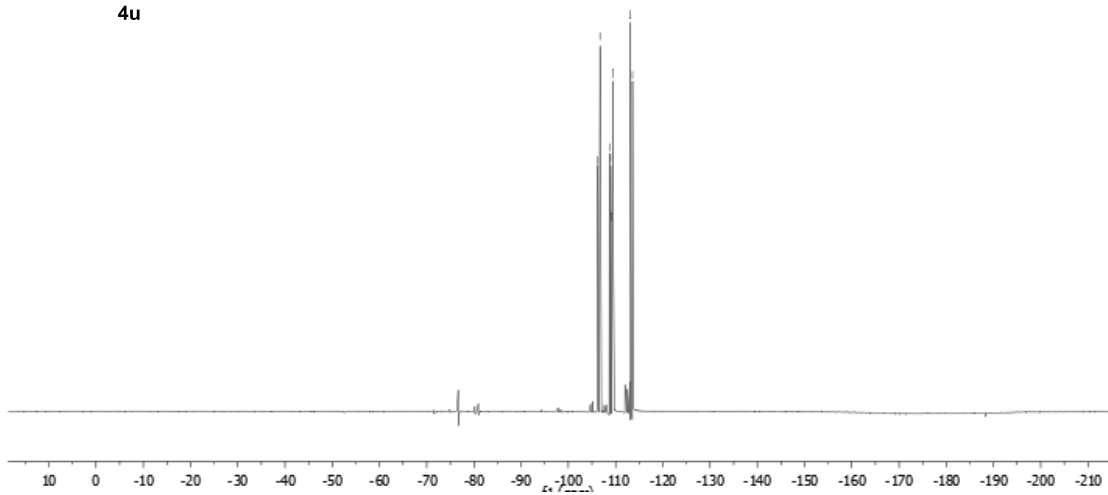

112.20, 80.05, 75.54, 74.40, 74.05, 74.17, 72.26, 58.86, 58.66, 58.85, 58.81, 58.80, 57.9, 57.8, 57.7, 57.6, 56.6, 56.6, 50.2, 50.1, 4.98, 4.95, 2.77, 2.76, 2.76, 2.75, 2.74, 2.58, 2.56, 2.55, 2.55, 2.54, 2.52, 2.51, 2.51, 2.50, 2.49, 2.49, 2.10, 2.02, 2.01, 2.00, 1.99, 1.98, 1.58, 1.36, 1.35, 1.34, 1.33, 0.88, 0.87, 0.86

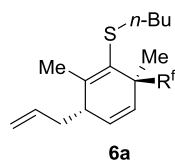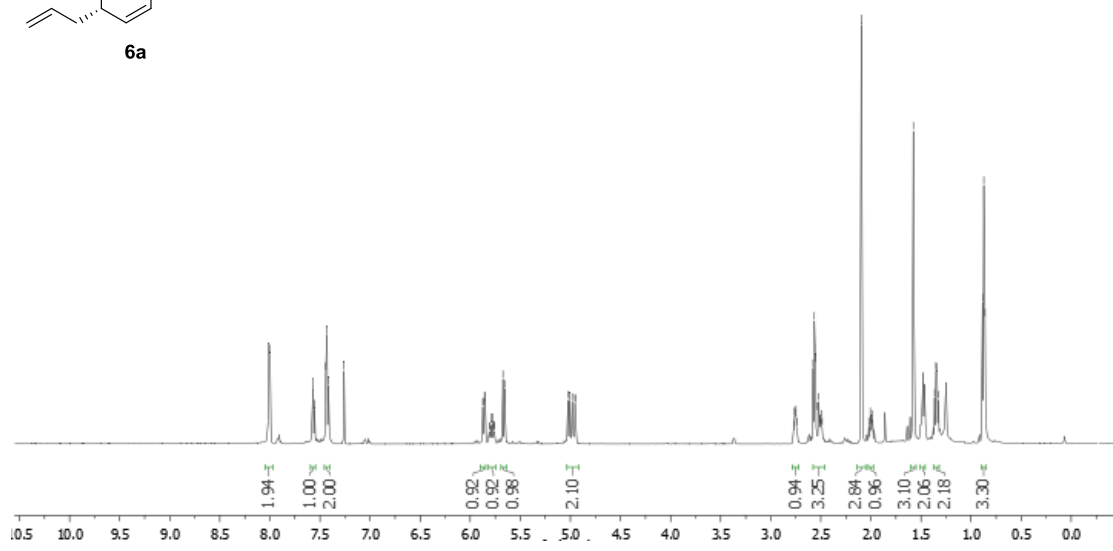

11222019-80

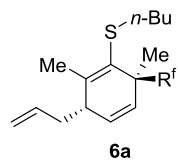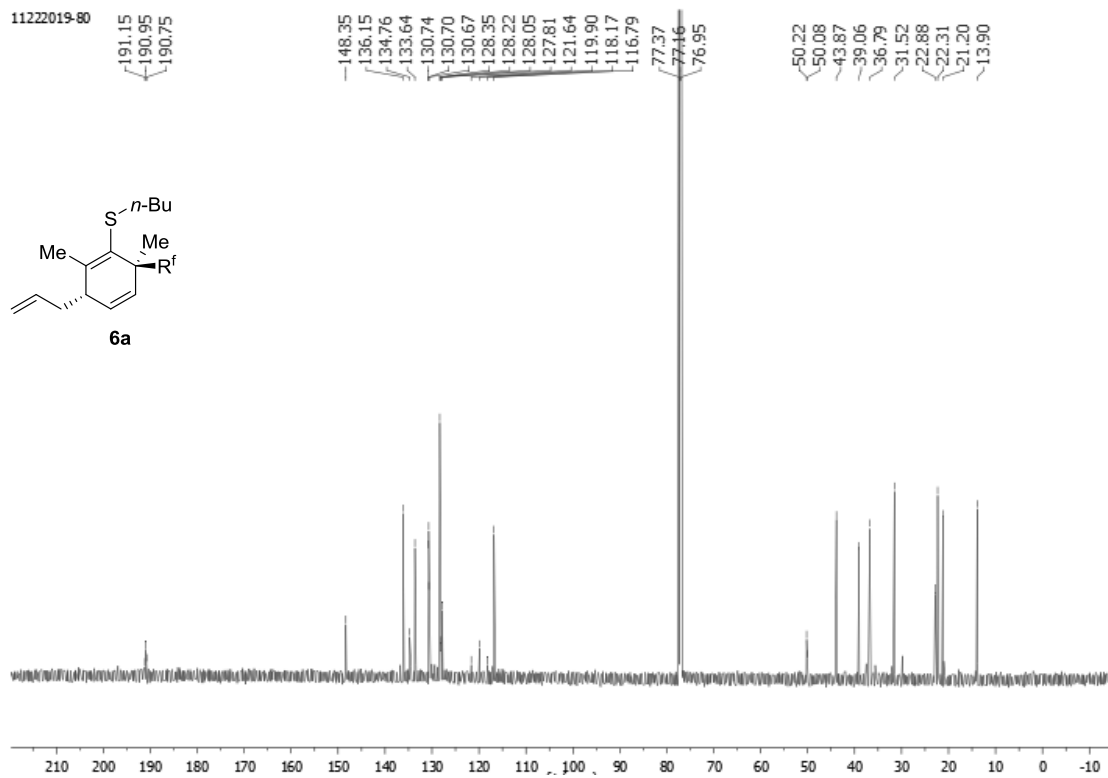

11222019-80

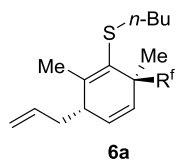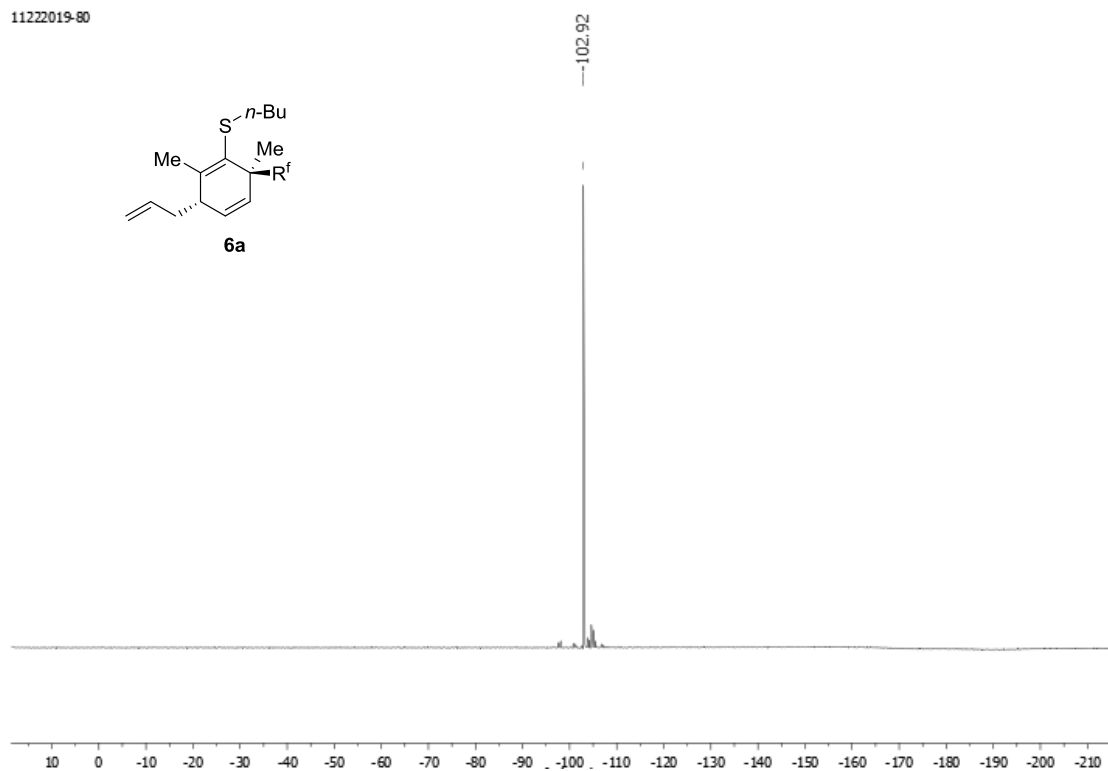

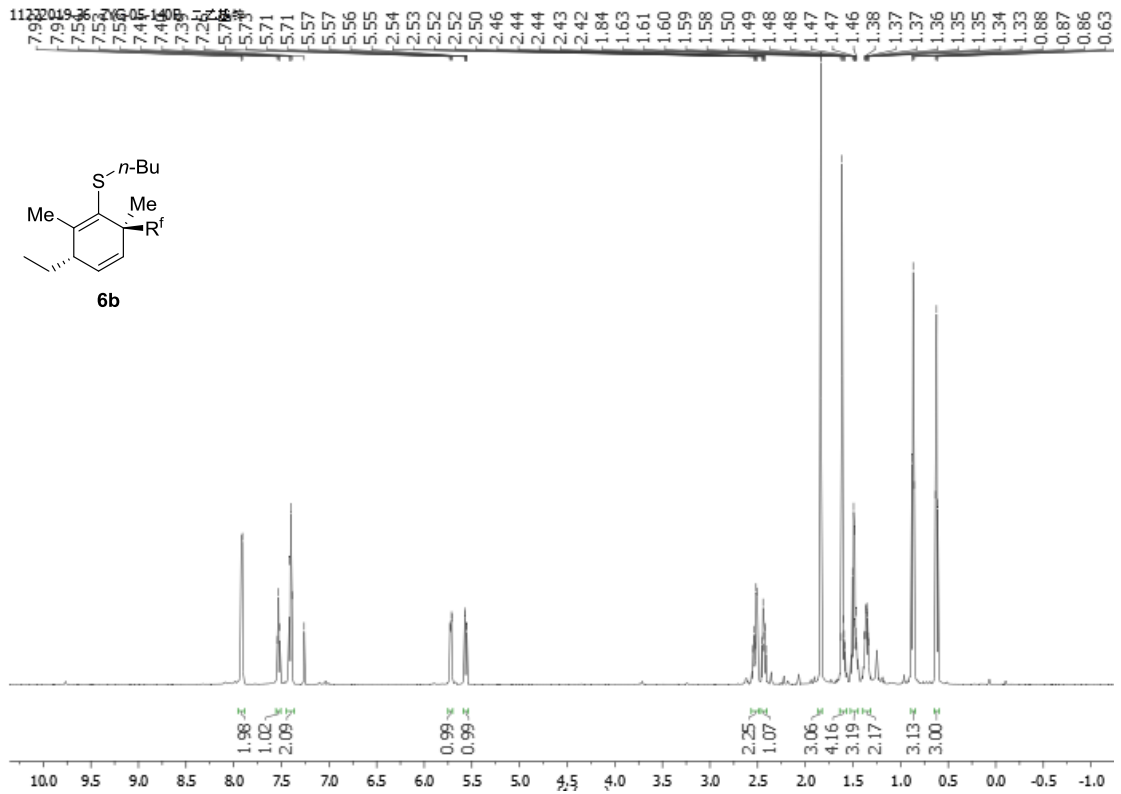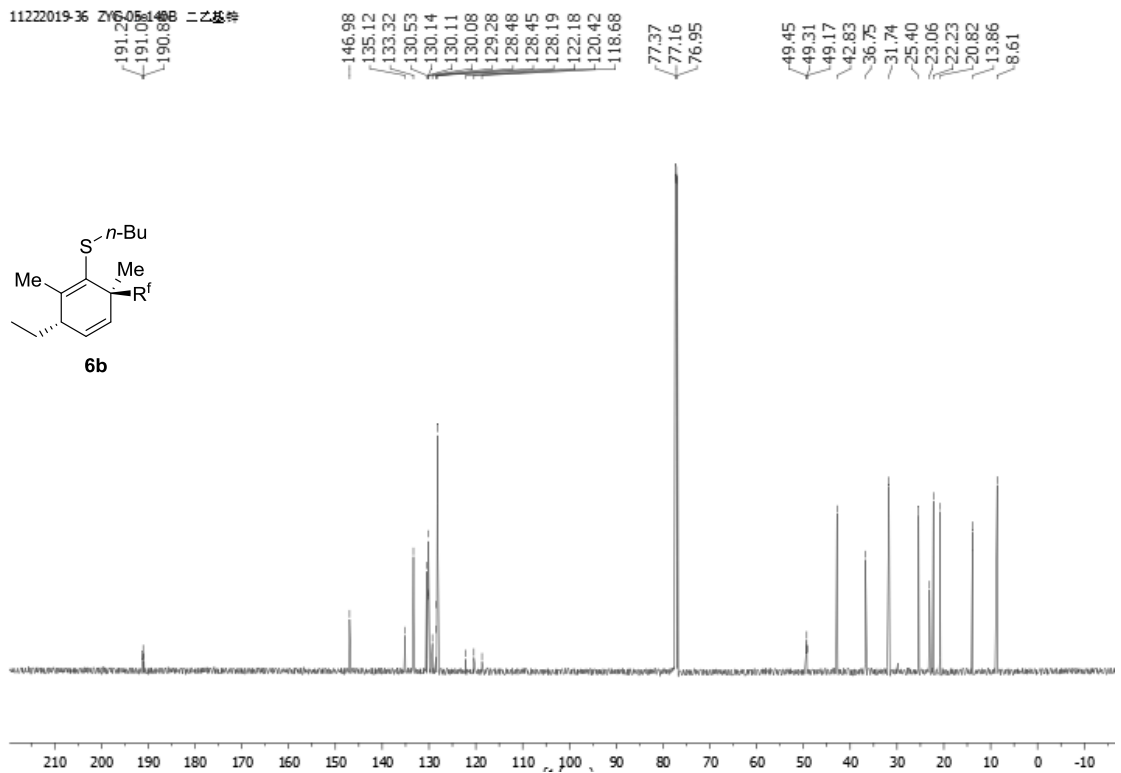

12232019-44 ZYG-05-164C Nu=谱粉

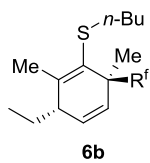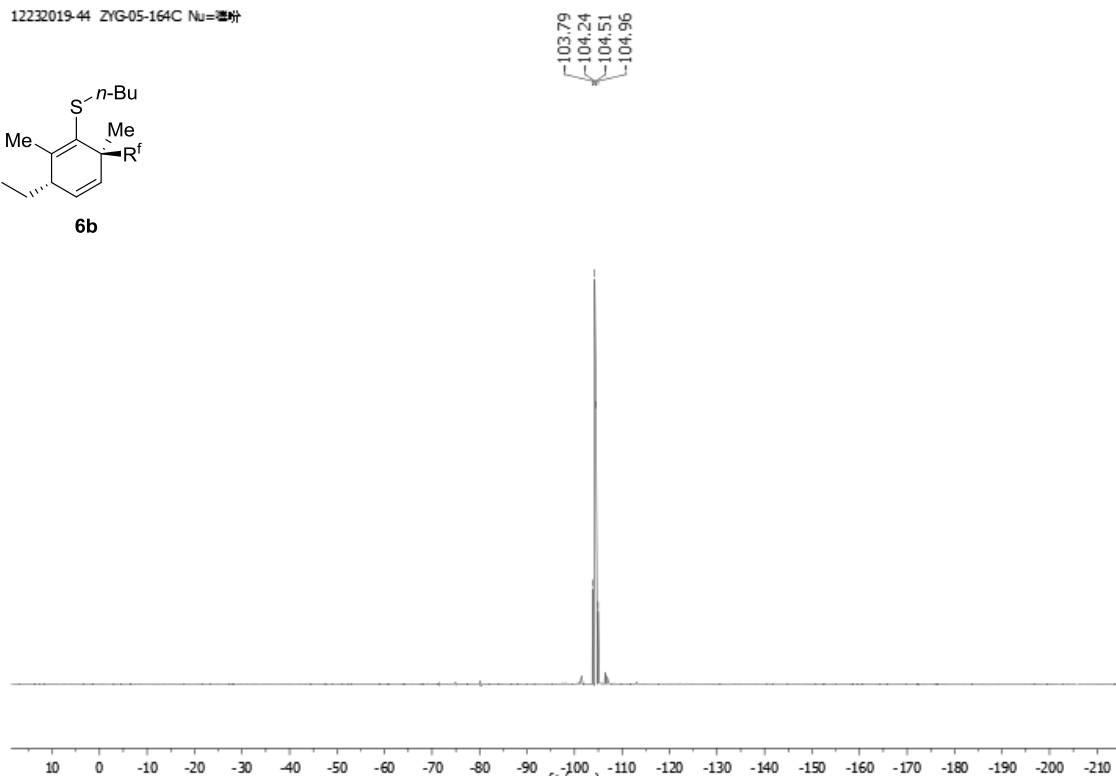

6d 乙腈-CDCl<sub>3</sub>

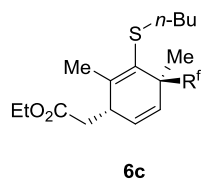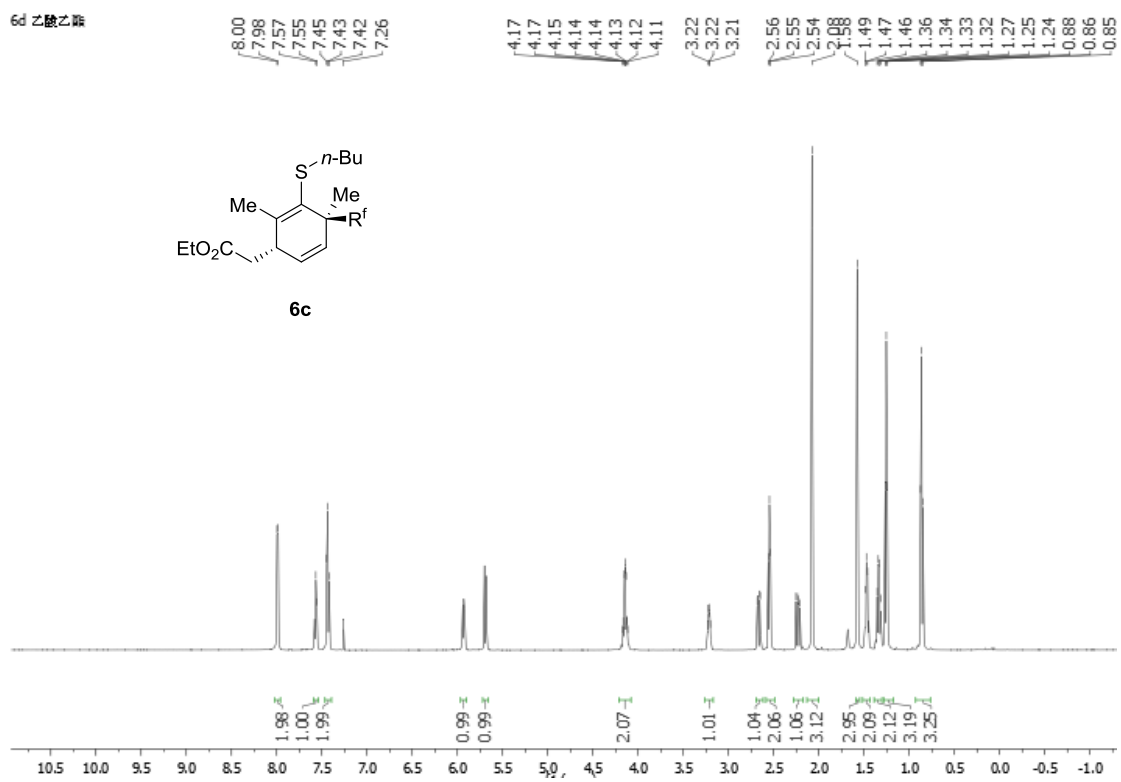

6d 乙腈-乙腈

-190.57

-172.27

-147.29  
-134.56  
-133.73  
-130.56  
-130.53  
-130.05  
-129.11  
-128.66  
-128.43  
-121.46  
-119.73  
-118.00

77.37  
77.16  
76.95

-60.77  
-50.11  
-49.96  
-49.82  
-40.49  
-39.08  
-36.72  
-31.51  
-22.73  
-22.25  
-20.93  
-14.35  
-13.84

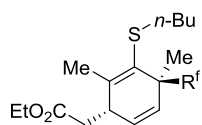

6c

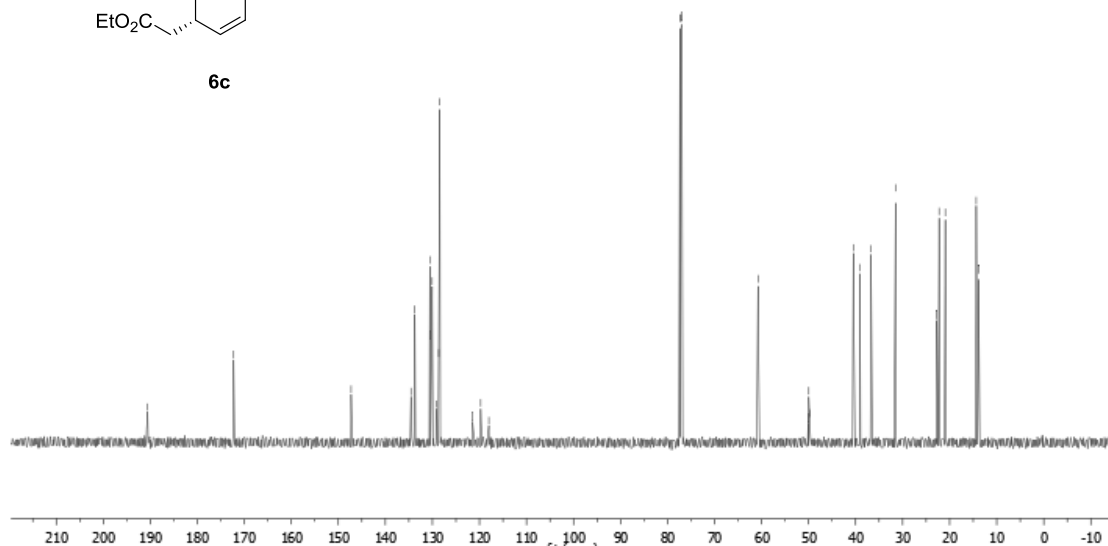

6d 乙腈-乙腈

-102.69  
-103.14  
-103.20  
-103.66

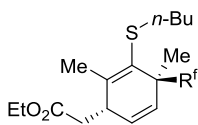

6c

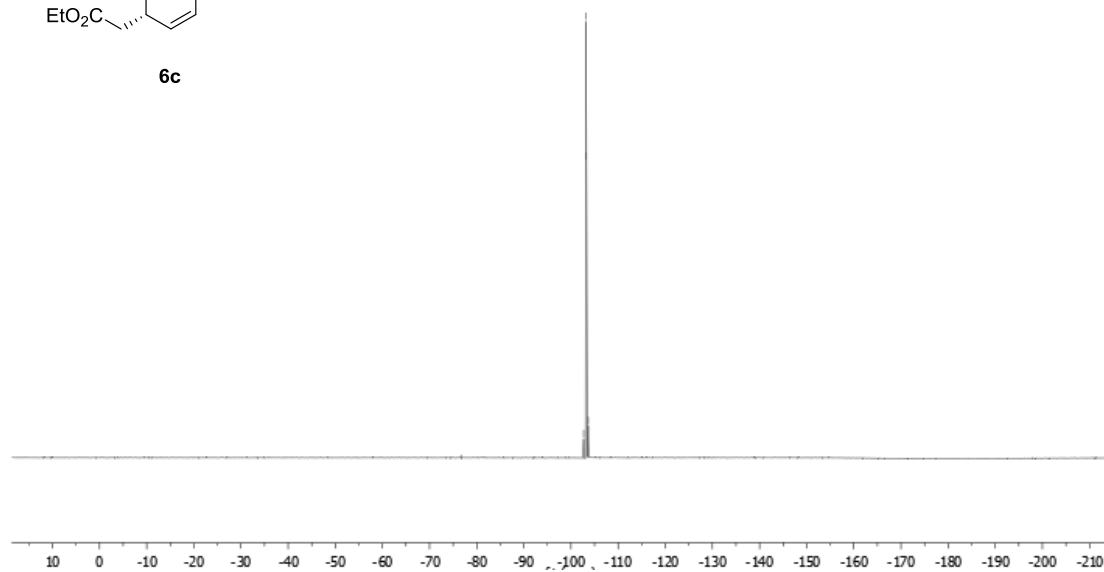

11222019-81

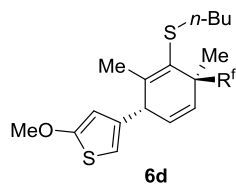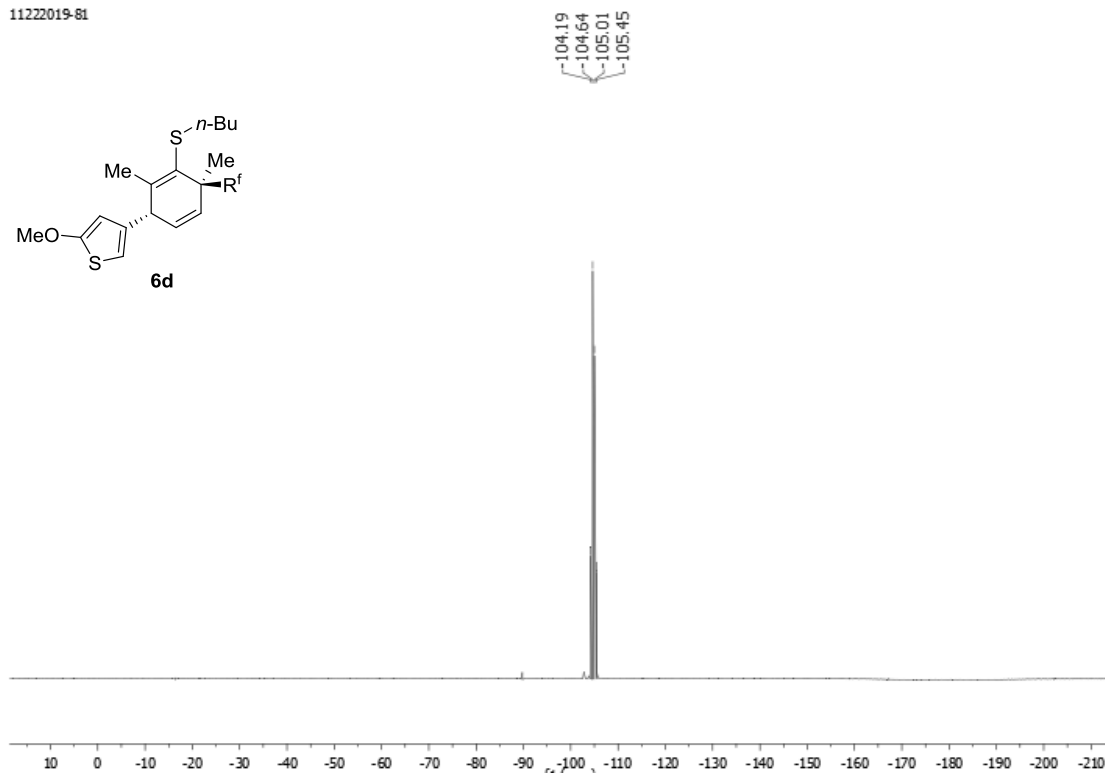

12232019-44 ZYG-05-164C

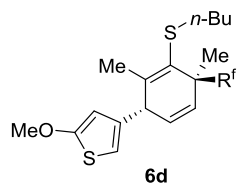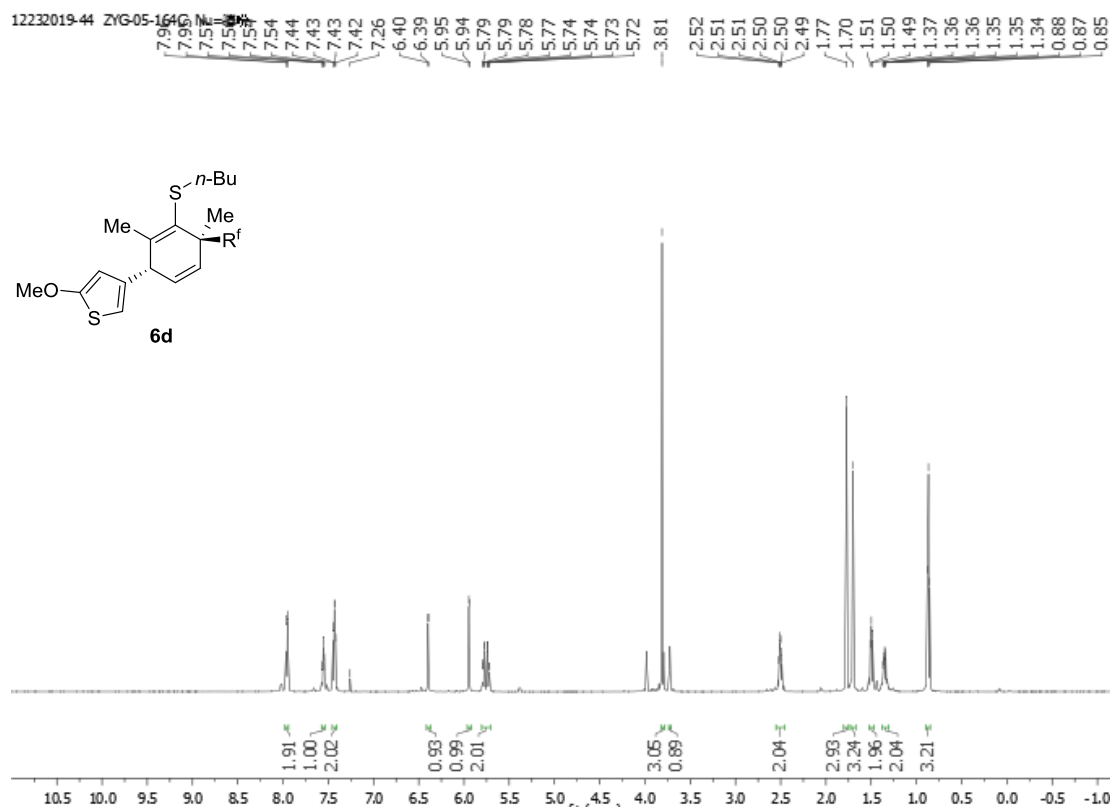



12232019-44 ZYG-05-164C Nu=谱

190.75  
165.89

146.05  
133.50  
132.84  
130.10  
130.07  
130.03  
128.30  
127.01  
103.63

77.37  
77.16  
76.95

60.14  
49.27  
49.13  
48.99  
45.48  
36.48  
31.67  
22.73  
22.16  
21.86  
13.83

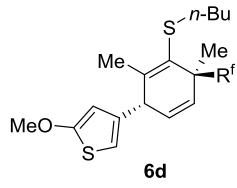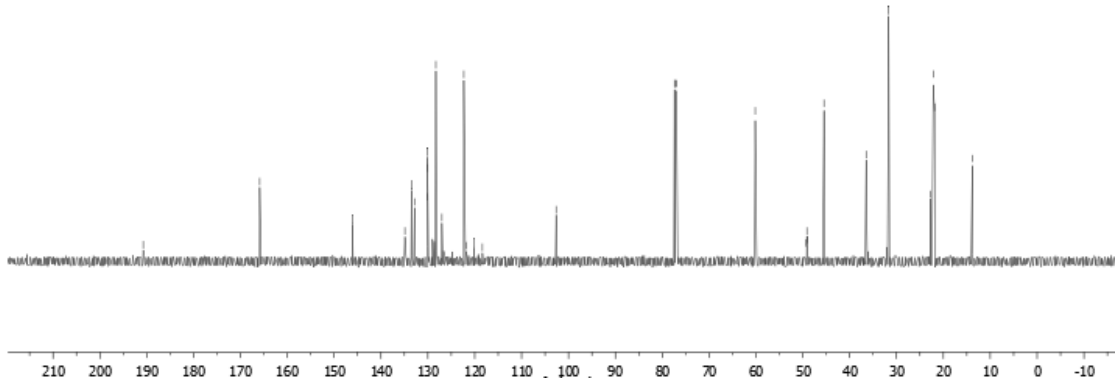

07.72019-24 ZYG-05-164C Nu=谱

8.172  
8.0  
8.02  
7.55  
7.46  
7.44  
7.45  
7.44  
7.43  
7.36  
7.35  
7.26  
7.19  
7.18  
7.05  
7.05  
7.04  
6.95  
6.85  
6.85  
5.85  
5.84  
5.83  
5.79  
5.78  
5.77

3.88

2.53  
2.52  
2.51  
1.84  
1.71  
1.52  
1.51  
1.49  
1.35  
1.34  
1.34  
1.33  
1.32  
1.30  
0.86  
0.84  
0.83

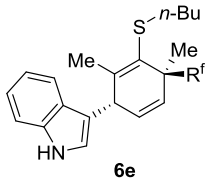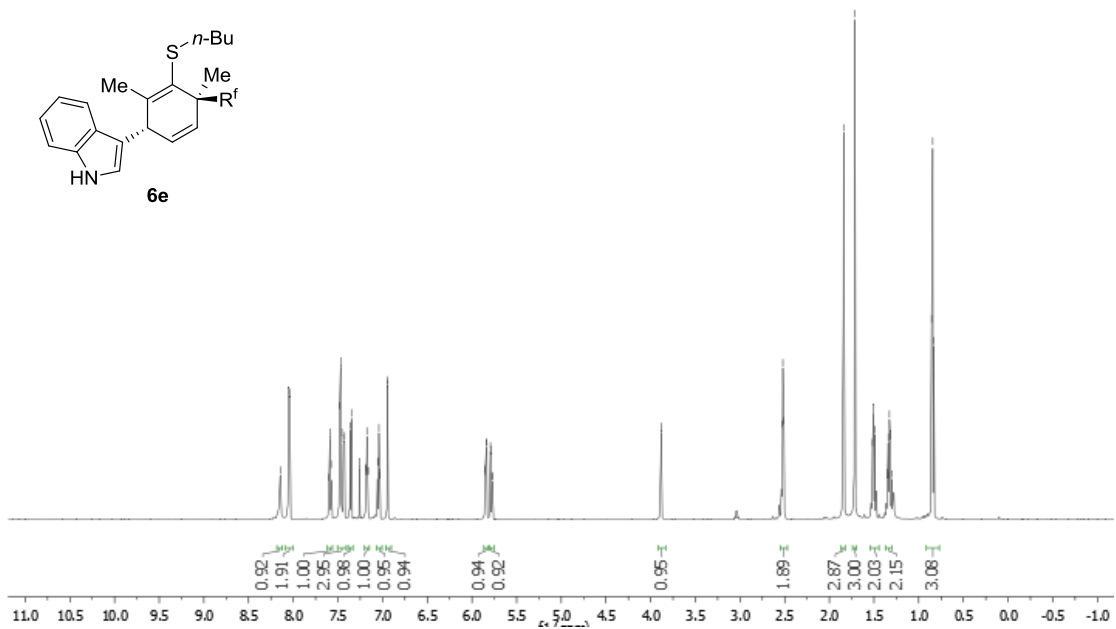

07172019-24 (ZYG-05-24B) 明اء

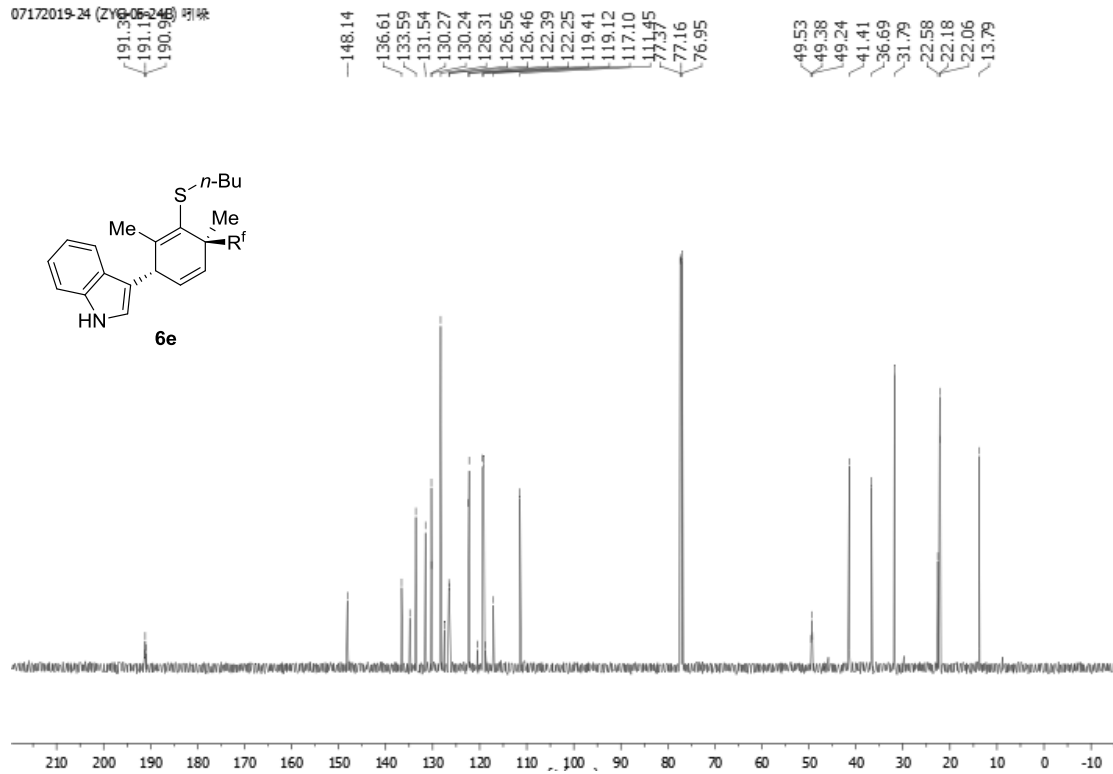

07172019-24 (ZYG-05-24B) 明اء

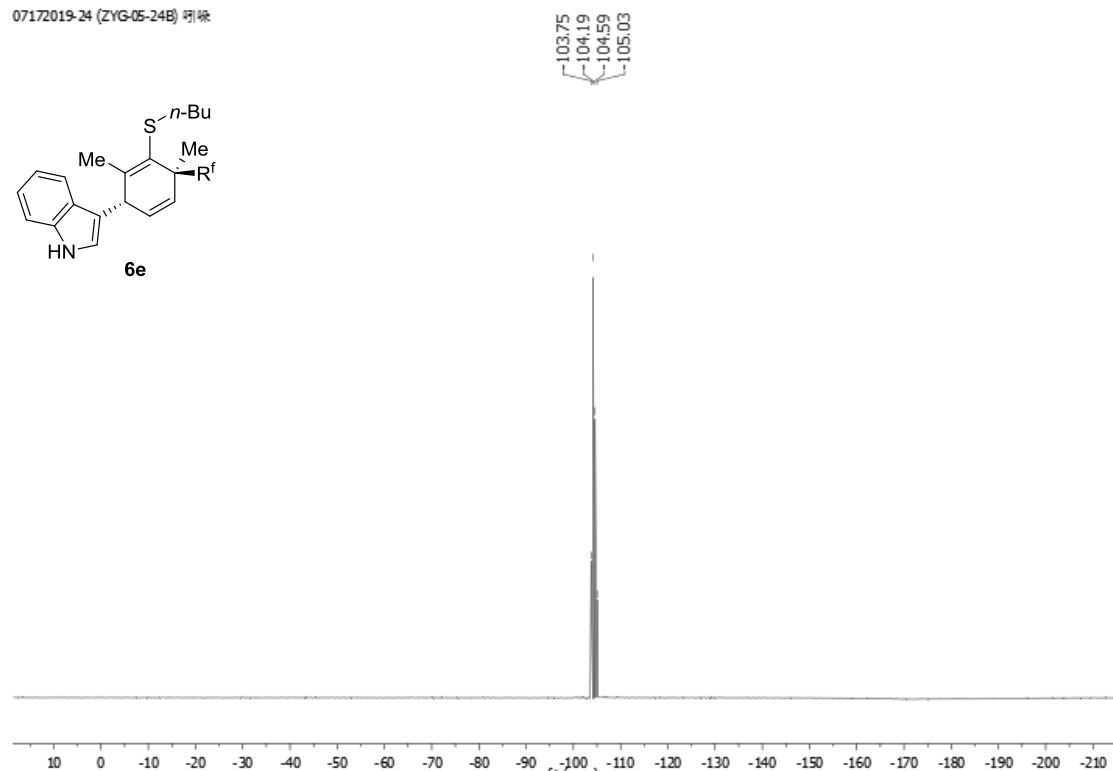

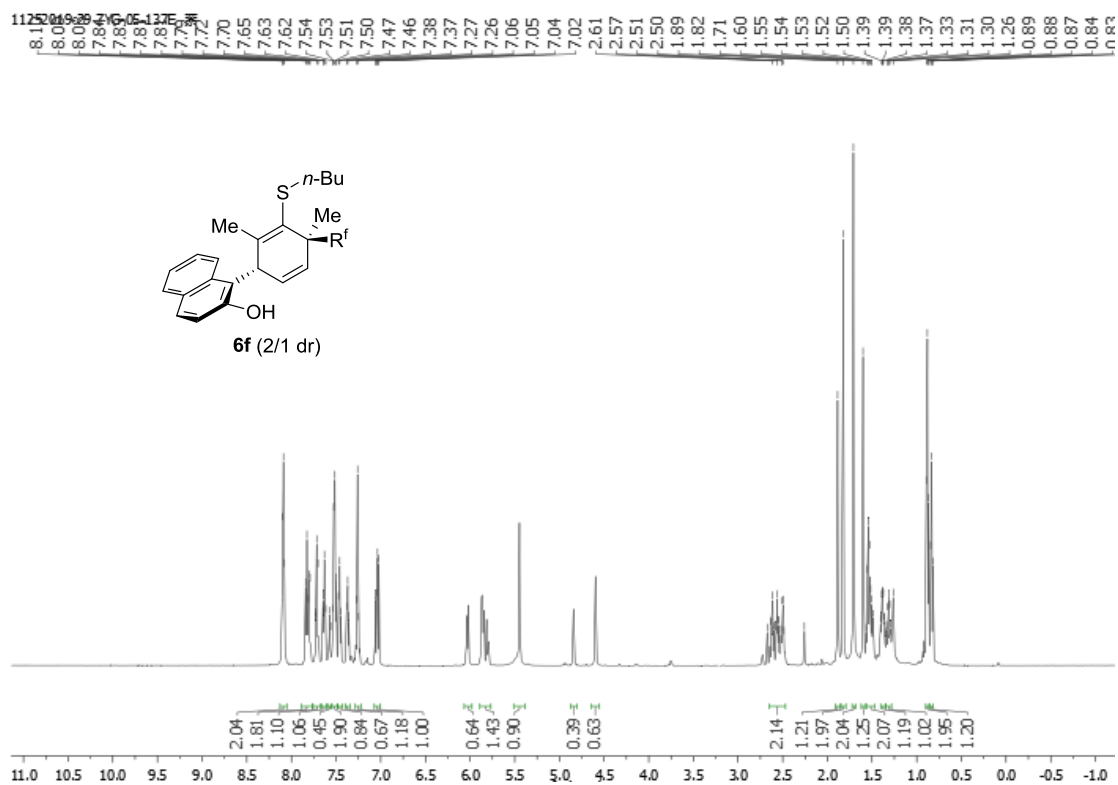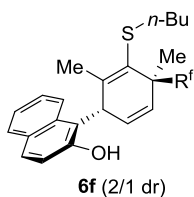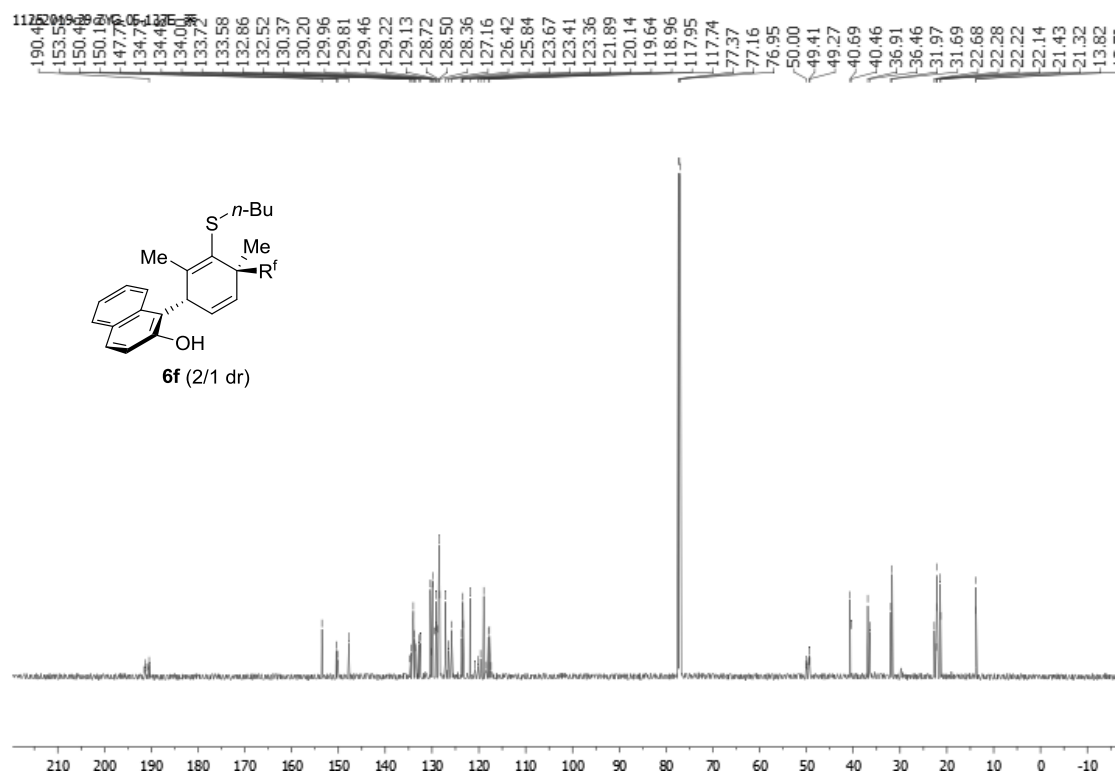

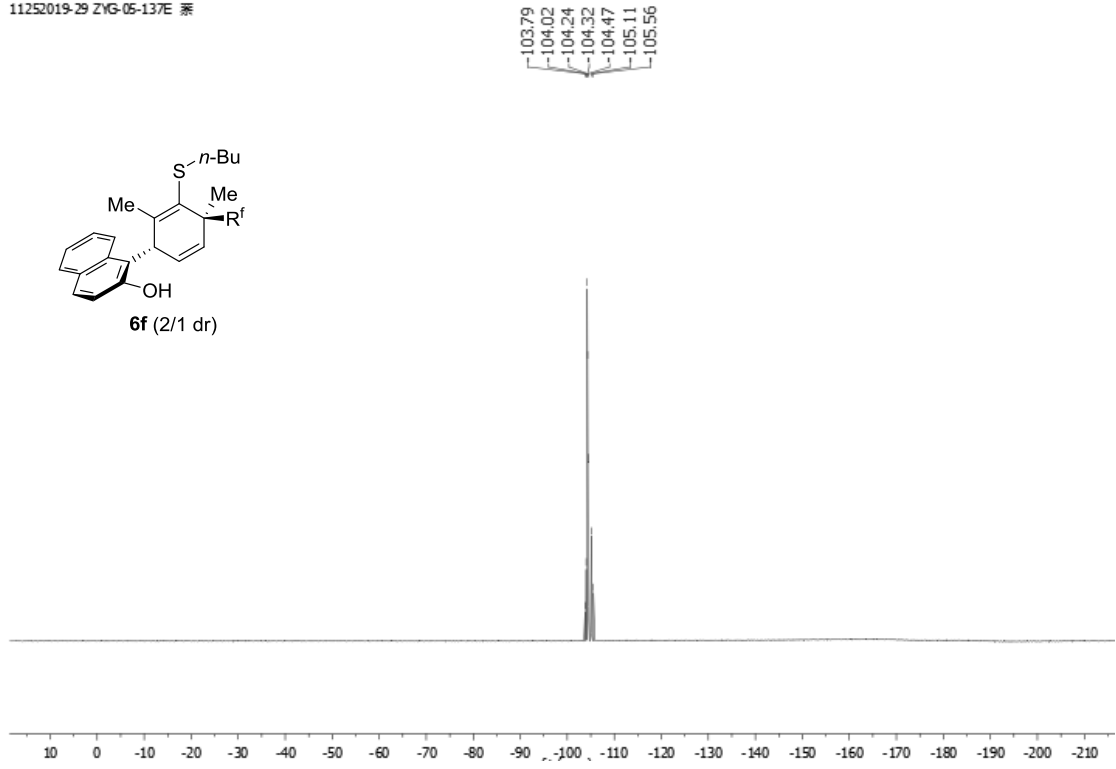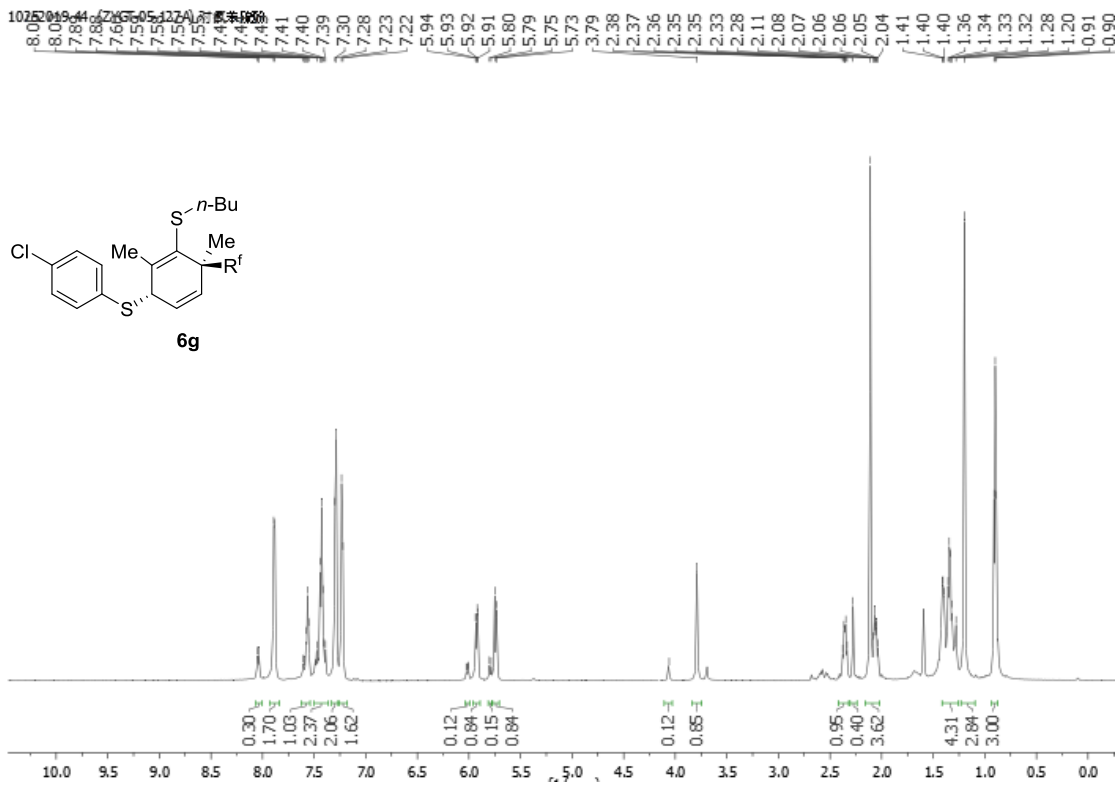

10252019-72

190.66  
190.47  
190.28  
142.55  
136.95  
135.17  
135.02  
134.41  
133.70  
133.50  
133.01  
130.73  
130.02  
129.99  
129.97  
129.84  
129.29  
129.17  
128.76  
128.39  
128.33  
128.00  
127.76  
121.31  
119.55  
77.16  
76.95  
52.57  
51.54  
49.41  
49.27  
49.13  
36.93  
31.61  
31.49  
22.39  
22.25  
22.20  
21.87  
21.66  
13.84

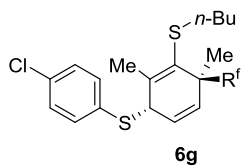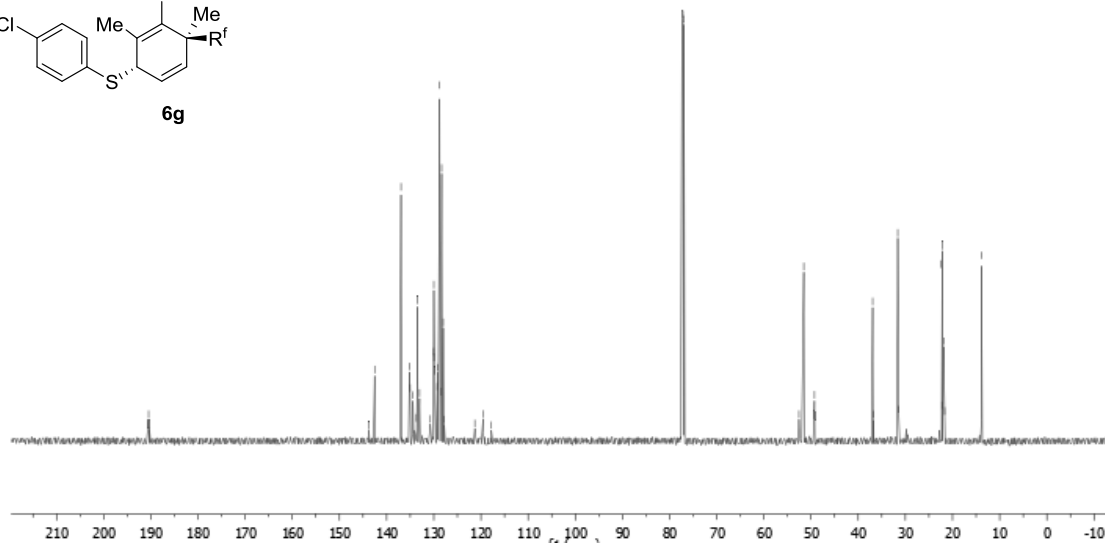

10252019-72

101.32  
101.77  
102.33  
102.78  
104.20  
104.20

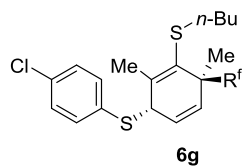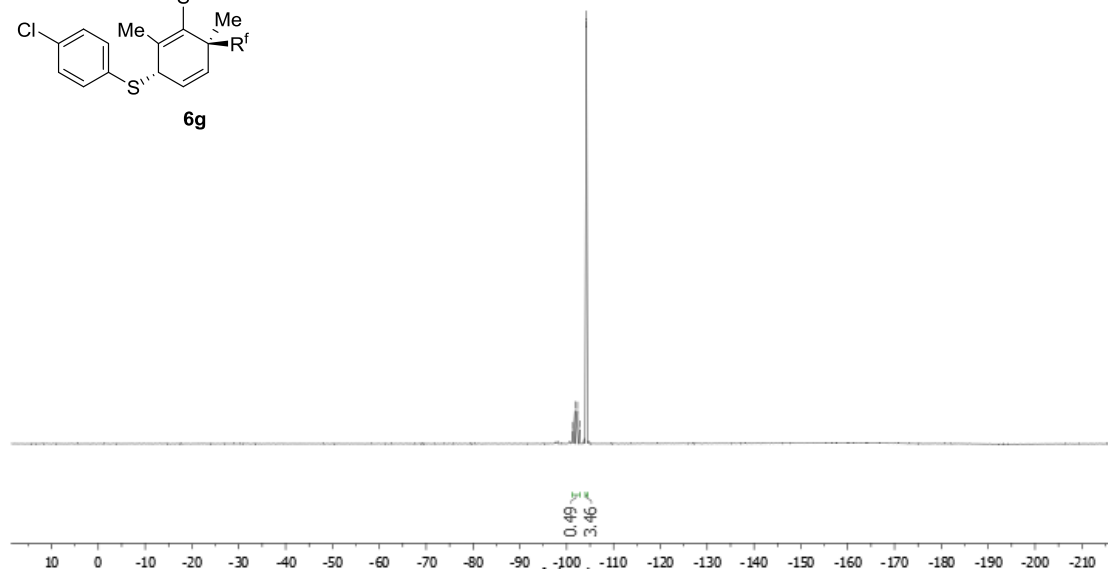

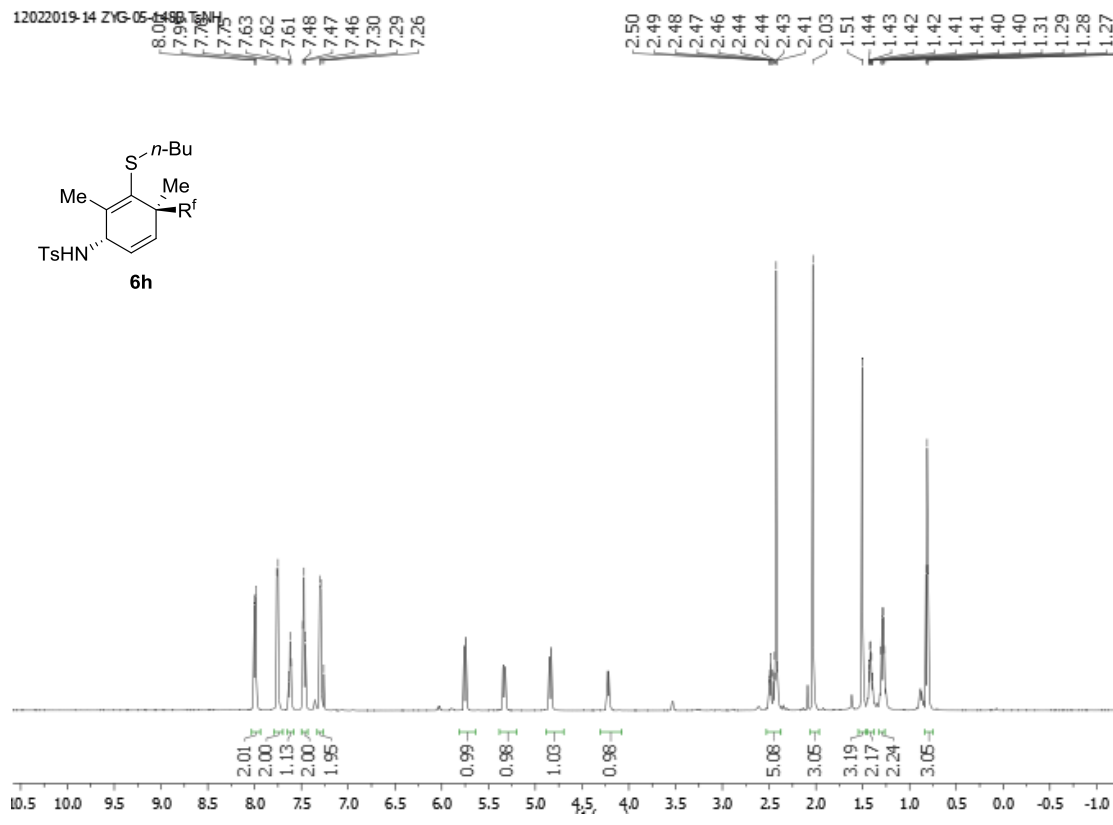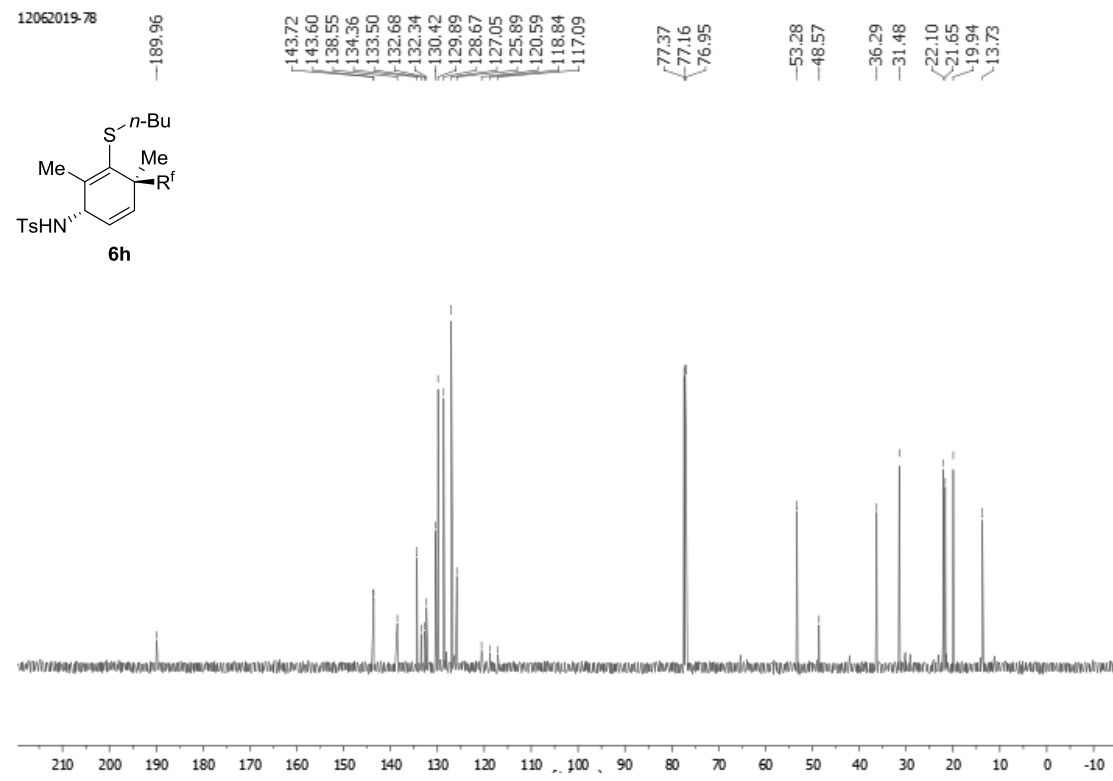

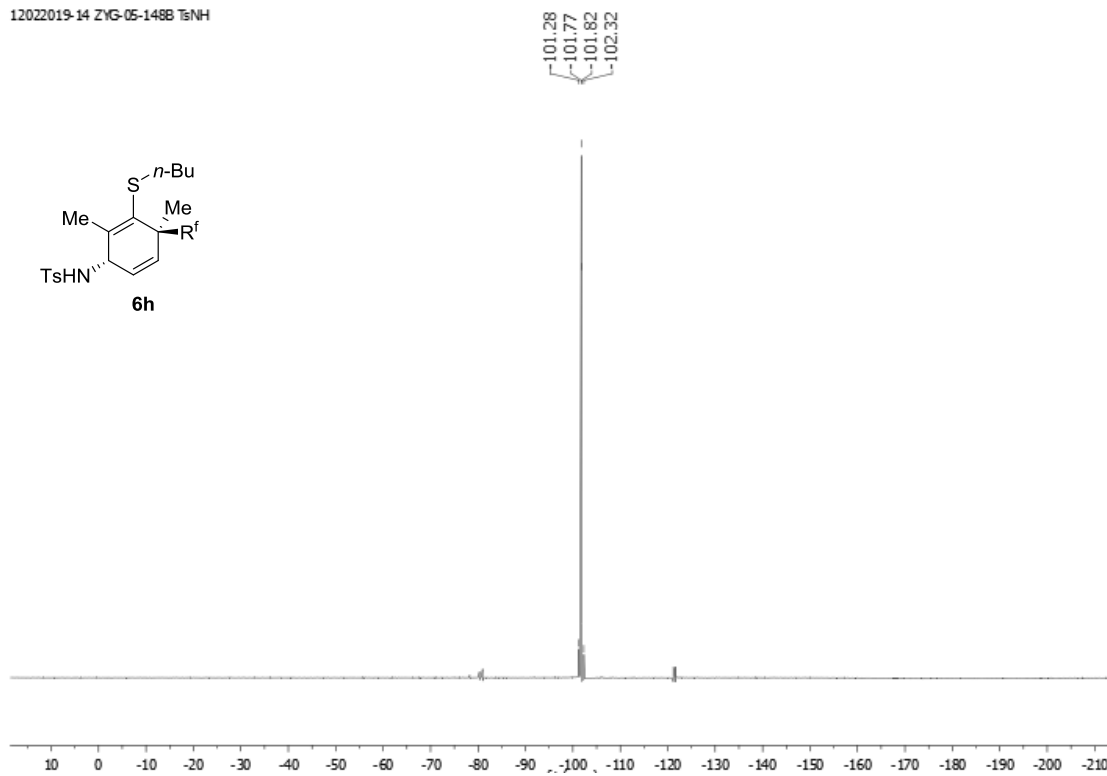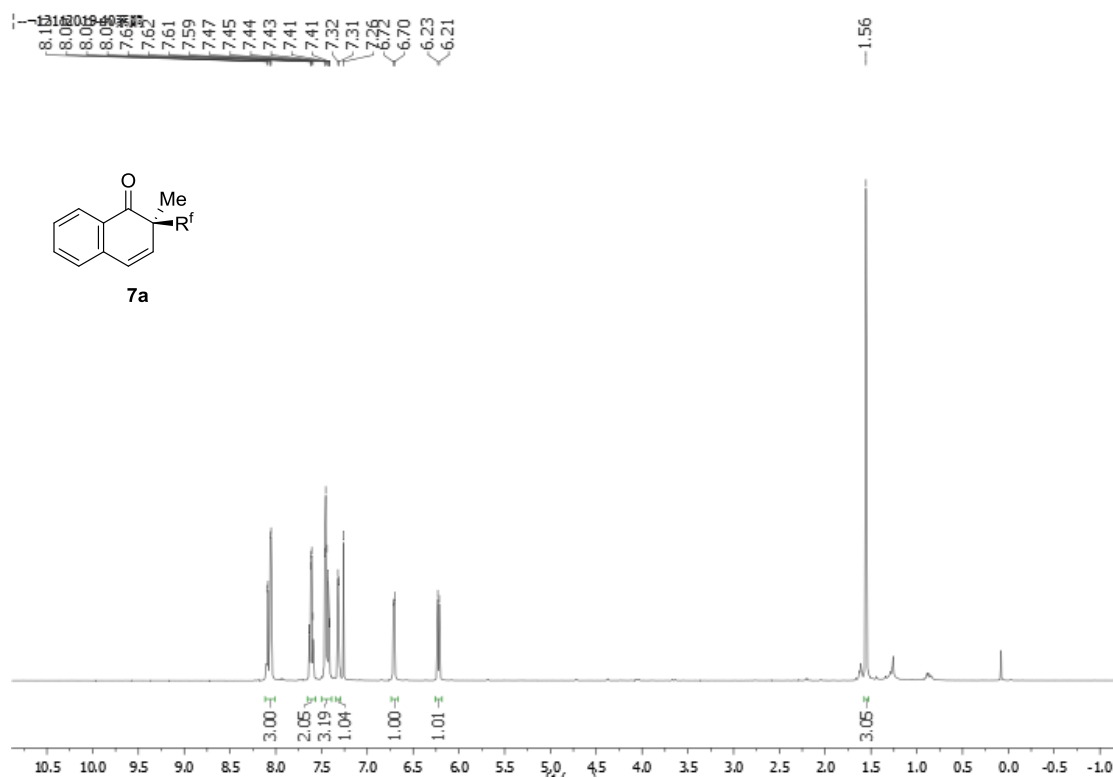

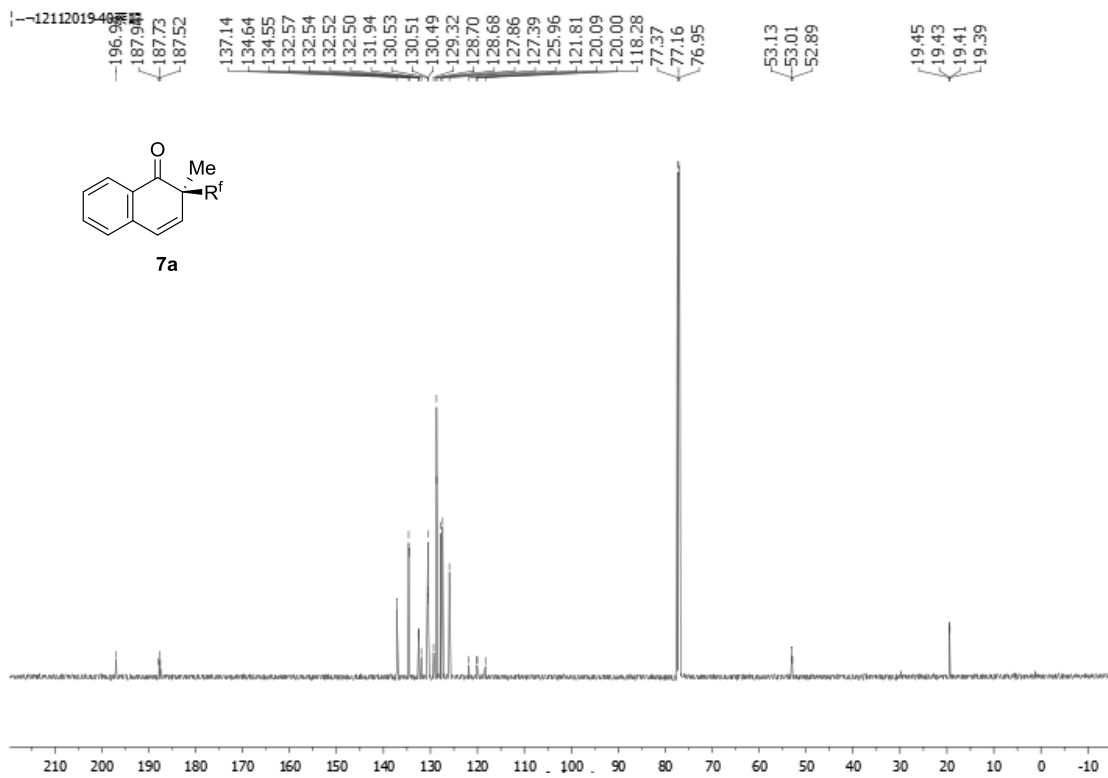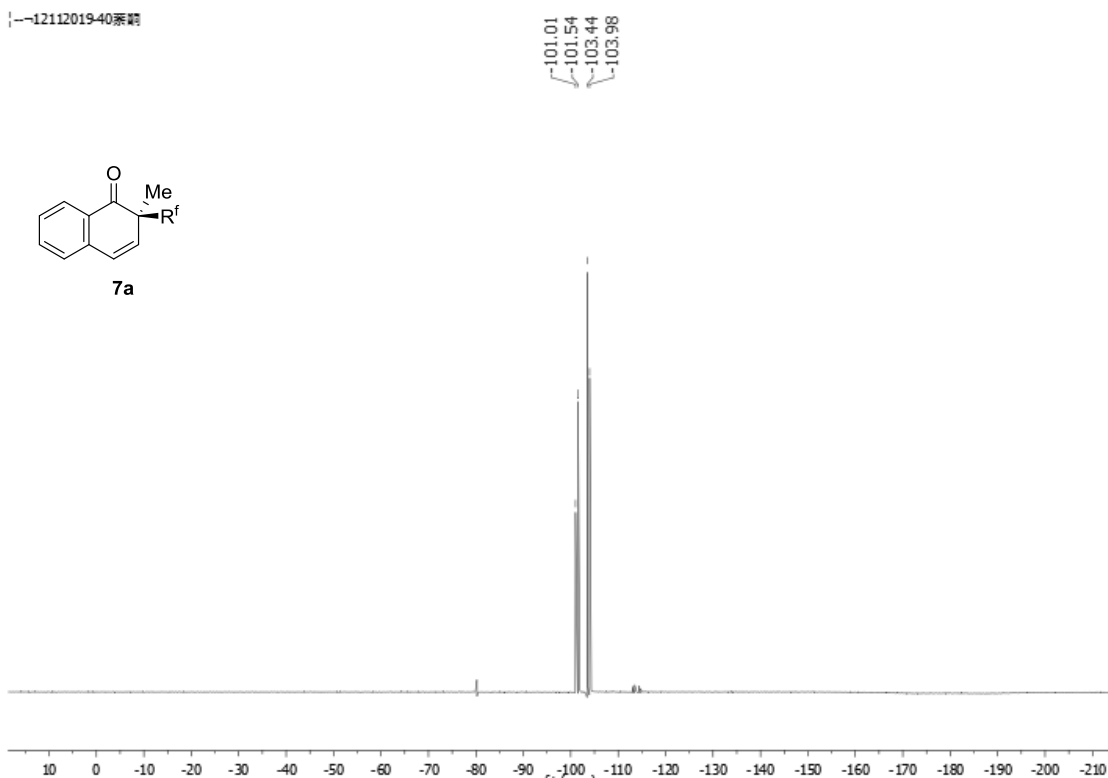



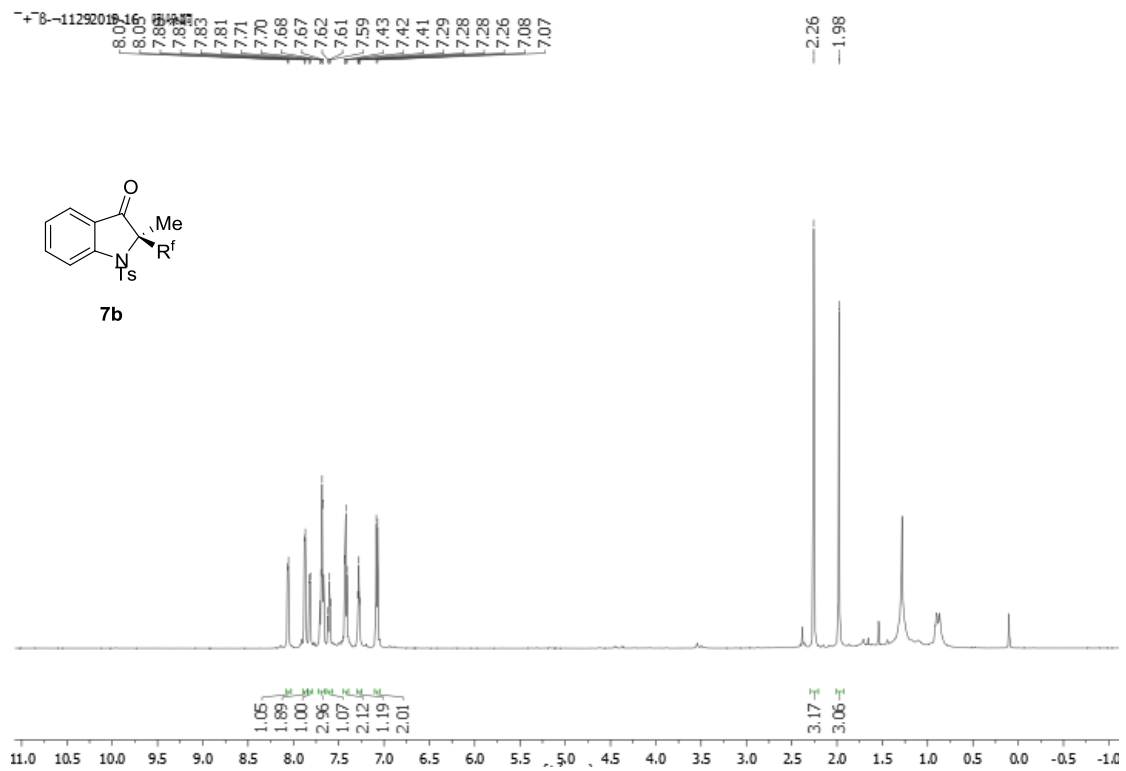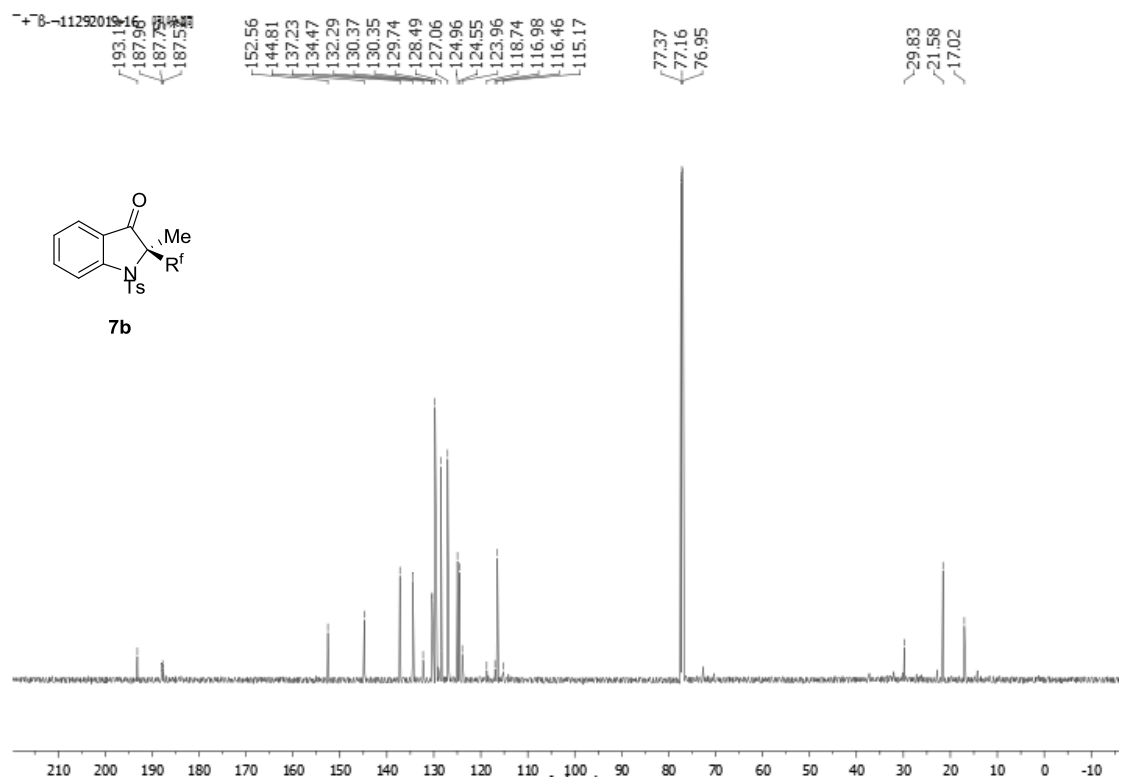

12172019-16 明绿酮

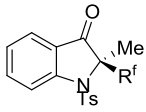

7b

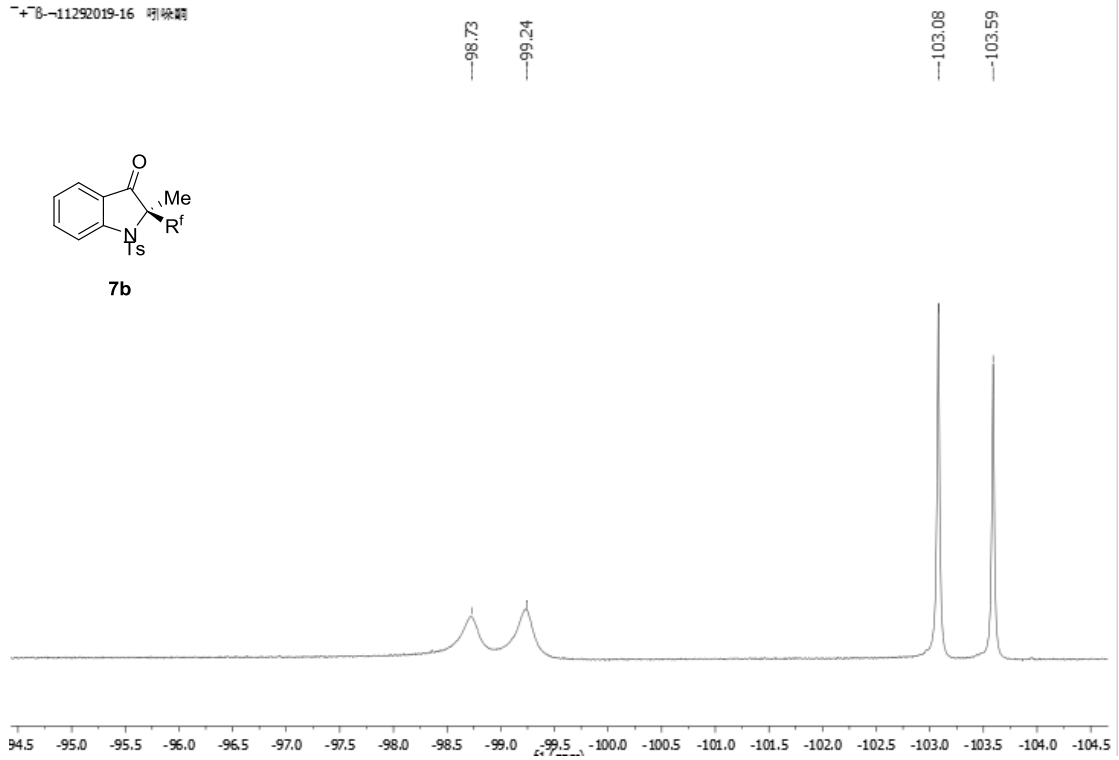

12172019-16 二次重排产物

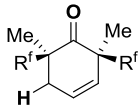

8a

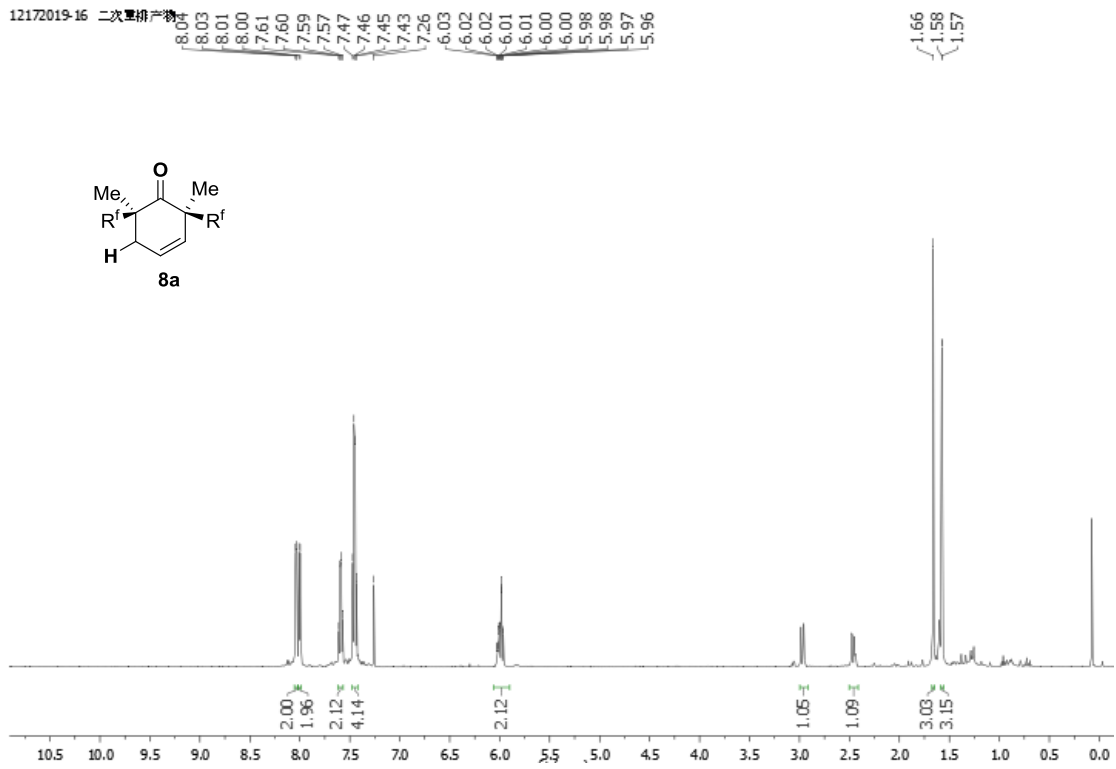

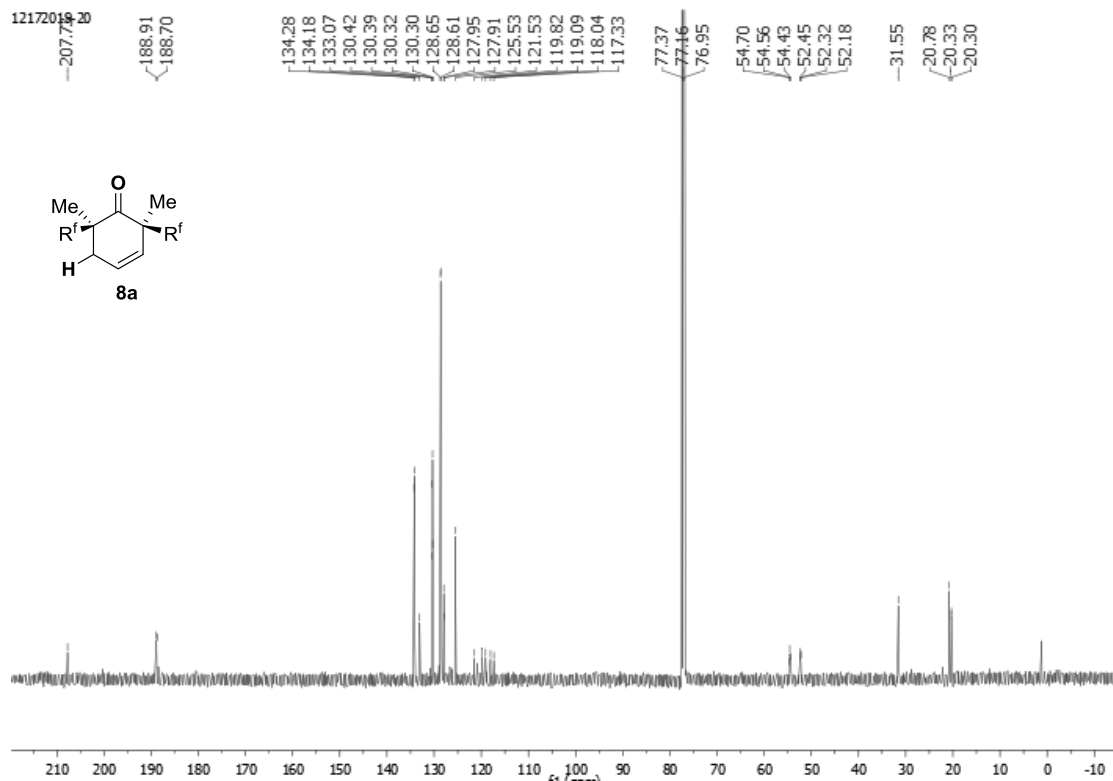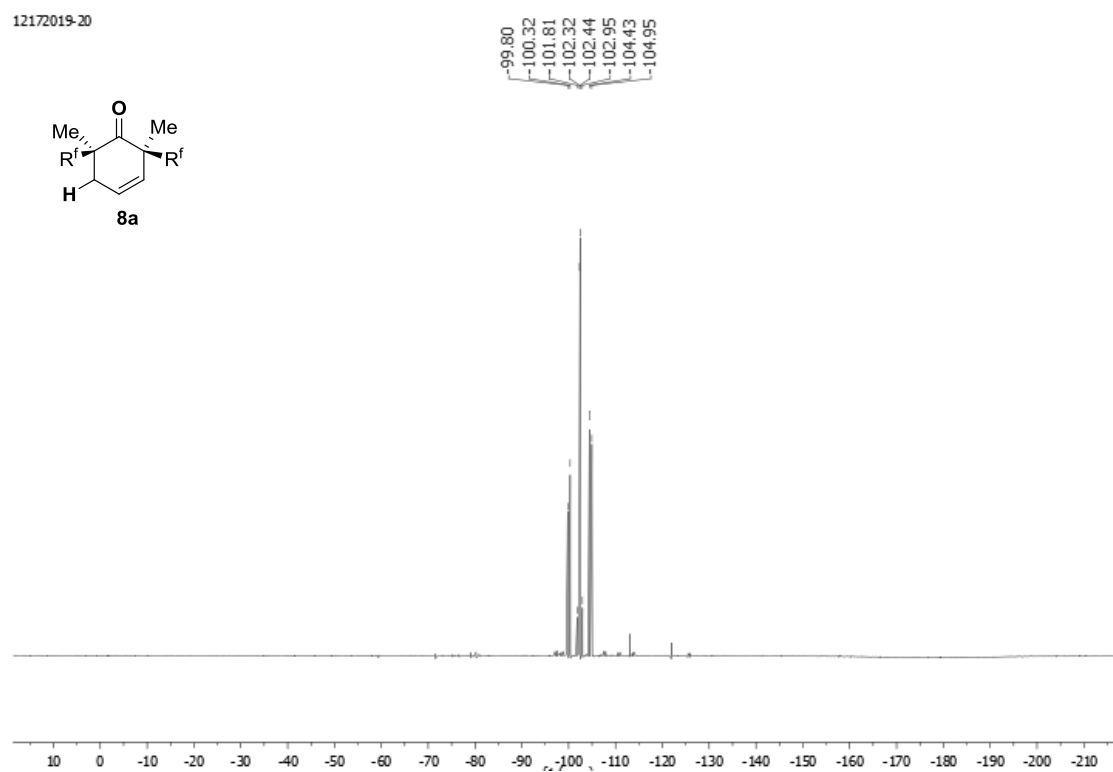

12232019-65 有机磷

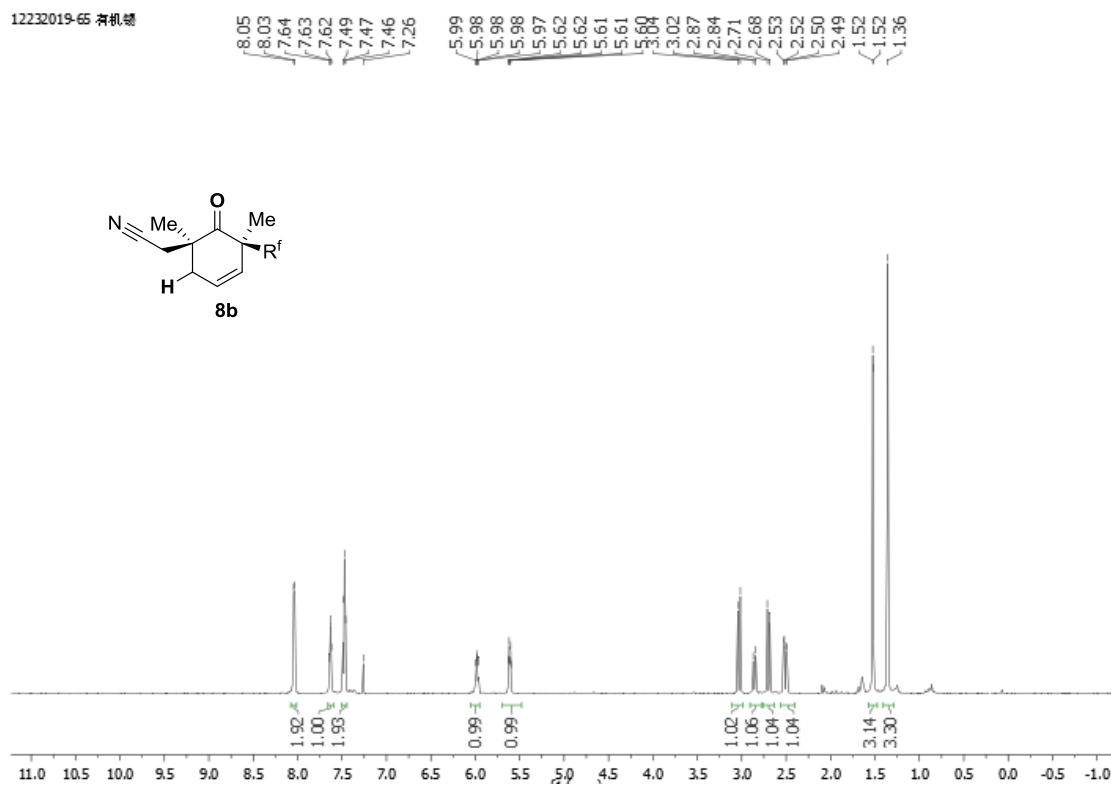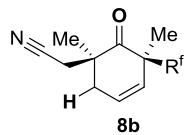

12232019-65 有机磷

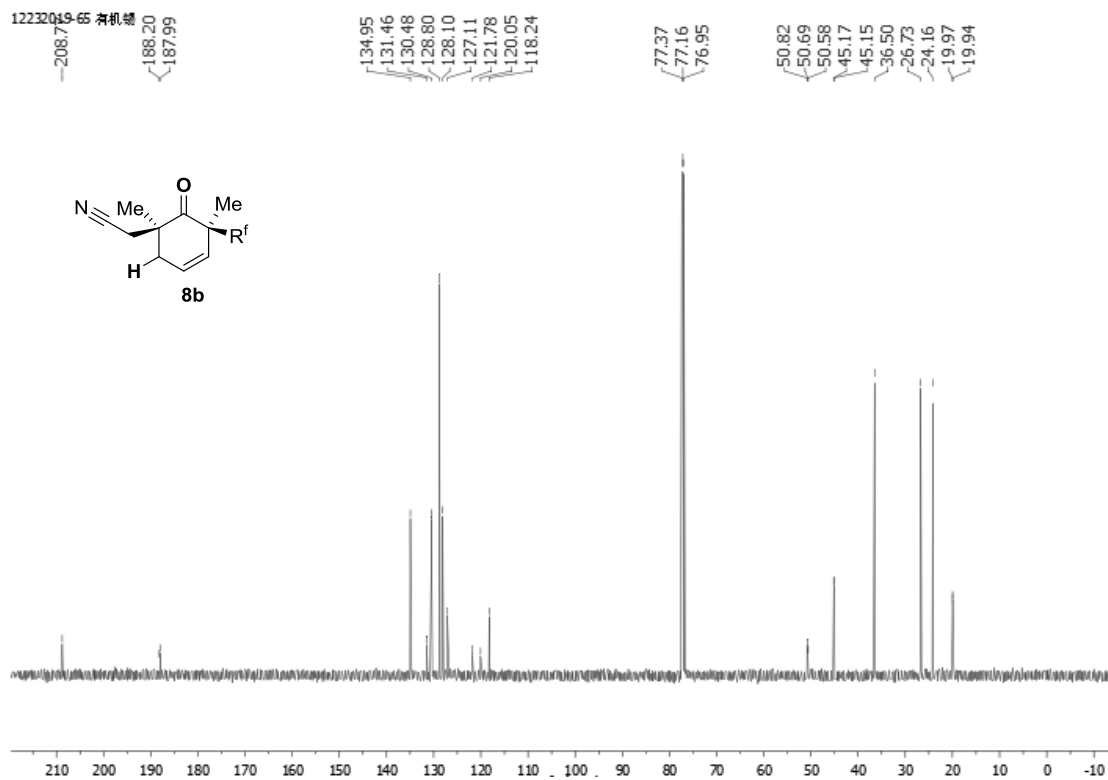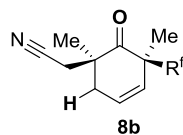

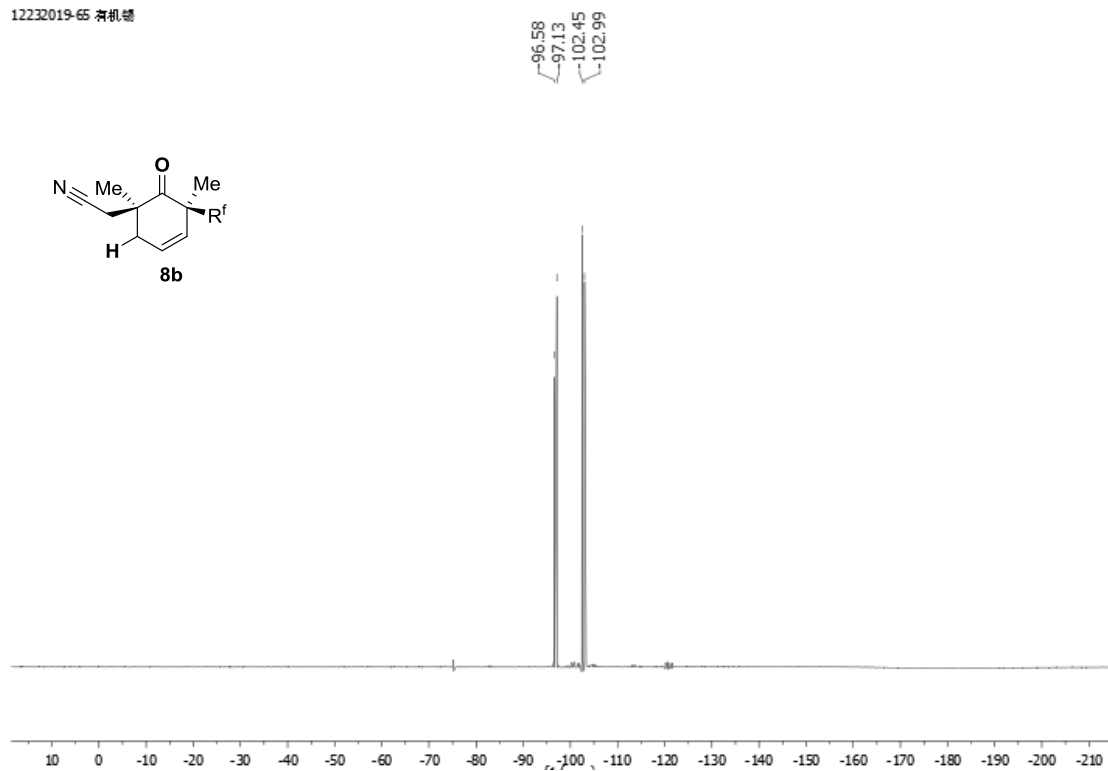

Supplement: d0sc00244e1.pdf [file d0sc00244e1.pdf]
